# Supplementary material
Source: ML conference proceedings conference paper supplement (https://openaccess.thecvf.com/content/ICCV2021/html/Tan_Instance-Level_Image_Retrieval_ICCV_2021_paper.html)
Supplement: Supplementary file 2 [file Tan_Instance-Level_Image_Retrieval_ICCV_2021_supplemental.zip]

Archive with 3 entries (2 files):
- 03114_supp/
- 03114_supp/image_names.txt
- 03114_supp/03114_supp.pdf
