# Supplementary material
Source: ML conference proceedings conference paper supplement (https://openaccess.thecvf.com/content/ICCV2021/html/Tan_Instance-Level_Image_Retrieval_ICCV_2021_paper.html)
Supplement: Supplementary file 2 [file Tan_Instance-Level_Image_Retrieval_ICCV_2021_supplemental.zip › 03114_supp/image_names.txt]

d/1/8/d1803eb9bf28f557.jpg
d/5/e/d5eeed0558eb4a2e.jpg
0/4/e/04e6fafeaa6699de.jpg
9/8/c/98ca79f1d96c50b4.jpg
1/0/c/10c7117edfc4f88e.jpg
a/3/f/a3f6121f07ec67f8.jpg
3/e/b/3ebc51f14328b399.jpg
e/4/6/e46d8871be9913c5.jpg
3/1/b/31bca7c0b98e3377.jpg
f/6/b/f6ba87dc63b302ef.jpg
1/c/c/1cc5006da857bbb5.jpg
7/8/3/783b9bb3c6873861.jpg
2/2/3/22341477b7115724.jpg
6/b/2/6b2ce9c493e705eb.jpg
a/f/d/afd610434e403f8f.jpg
b/a/5/ba5f125507318a5b.jpg
f/b/e/fbe9fbf7ffb1be49.jpg
2/0/0/20006112512633f0.jpg
b/9/f/b9f029ee47efbbf8.jpg
4/0/3/4037a23606e18e51.jpg
e/9/b/e9b4083aeab34b45.jpg
c/c/9/cc9d86f411f3e3f0.jpg
c/a/1/ca161d40f6878125.jpg
3/7/5/375007df558b289c.jpg
1/9/8/198a950bd364947c.jpg
a/b/1/ab137aa1b5b61cd4.jpg
b/3/c/b3c9be73cbfa7b81.jpg
a/1/9/a19e4499d8e5fdfb.jpg
9/d/2/9d27a8a697ce39cd.jpg
8/f/5/8f5c7d56d39bc983.jpg
c/6/a/c6aa9ed1b0e8f769.jpg
3/c/1/3c1424bb103e0c93.jpg
0/0/9/00943f21844a4861.jpg
d/6/a/d6ae259041a1124e.jpg
7/1/8/718dc1888875d41f.jpg
e/2/a/e2abb5d7851df0fa.jpg
2/f/6/2f655f6df6ff2fc1.jpg
b/d/1/bd1e6fc79fe26273.jpg
6/8/a/68a56b701ea2d28b.jpg
8/2/a/82abeb18e4cc391d.jpg
1/7/9/179e97ee5d359226.jpg
2/6/a/26ad6fd4a21d984c.jpg
4/1/8/418afc3460267fdd.jpg
2/a/2/2a2272224ffc0b89.jpg
d/1/7/d17b31cf788c283a.jpg
e/e/3/ee35054414ca0571.jpg
1/0/7/107fd37ae80df564.jpg
a/c/8/ac8fc0ab412c79f4.jpg
c/1/c/c1cb3aafe7e77fe9.jpg
3/f/9/3f90e003d653c83f.jpg
a/1/9/a192042294888af6.jpg
7/8/f/78f9daaa9efaab7d.jpg
7/3/9/739663a7a6f24fdb.jpg
8/c/2/8c2a3157ed7dfb63.jpg
9/9/a/99ad5e8a8c0b8021.jpg
4/b/a/4ba3b558b2737d38.jpg
c/1/e/c1e6aedfec54b174.jpg
9/6/a/96a37dd88f328db3.jpg
4/0/3/4038a0c5ddcaf0e4.jpg
9/1/b/91b11258910d20df.jpg
a/4/8/a487d9597118b809.jpg
8/3/d/83d8a93e4d9d5a95.jpg
3/e/e/3eeffddd9866448c.jpg
d/3/9/d3923cace064ca0b.jpg
b/0/3/b03803724f1c42b5.jpg
f/a/1/fa1206da4bd26d3a.jpg
d/1/9/d19408461b142cb7.jpg
4/3/5/435a1c33a51f98a8.jpg
d/5/b/d5bc25affe2c206d.jpg
1/0/7/1072ec1c580c1ff9.jpg
8/2/b/82b5937a9743977a.jpg
f/9/1/f91ca6c3e49d340d.jpg
0/3/e/03e1124c6ffed51d.jpg
a/0/2/a029167a20493ebd.jpg
e/a/4/ea4f6ca05d92ed58.jpg
5/0/c/50ce976e812293fd.jpg
8/9/b/89bc7efcb81a366e.jpg
1/d/e/1de314c1499b6b82.jpg
0/b/6/0b61ffd2c9a8703c.jpg
4/d/9/4d9351a60f671e8e.jpg
0/6/3/063b7681abda53c9.jpg
1/9/4/194e73d6bbbf2cdb.jpg
f/b/f/fbf1ec7623c2692b.jpg
5/0/c/50cbe5e47b432b89.jpg
d/3/c/d3cd932e3153220e.jpg
0/e/4/0e4d918544883142.jpg
c/a/6/ca6ead96c664fff9.jpg
e/e/7/ee70f321c38ddcdb.jpg
f/a/c/facdba123840058c.jpg
5/c/4/5c409032e991e053.jpg
0/5/b/05b8d9b14bd5e6c1.jpg
d/f/5/df5c162f7e73b0d6.jpg
e/1/d/e1dfe34bfc81e4fd.jpg
4/d/c/4dcf320855d46bfd.jpg
f/a/9/fa9006ceb7589906.jpg
e/b/4/eb47ce0eb6f2dfdc.jpg
e/a/5/ea5fd84c95aa1545.jpg
5/b/7/5b7c761b42e7887a.jpg
6/8/1/681bc4a6b6359ddc.jpg
c/0/d/c0dc061f0dd90127.jpg
d/6/a/d6a7173597f8bfa3.jpg
d/2/6/d26ce62ed8a502d3.jpg
2/4/c/24c5552e074064c6.jpg
5/3/6/5367773e31cc5a07.jpg
5/3/0/530bc57cafef8764.jpg
3/e/6/3e6b3ffb81748deb.jpg
c/1/7/c17d53eadd1993c4.jpg
3/b/6/3b609a7b57db089b.jpg
8/7/0/870517aee2955701.jpg
3/9/d/39d53c262d2d4a9b.jpg
f/6/4/f6441c8c4fa5e8b3.jpg
4/5/9/4598bcc48753b471.jpg
4/e/8/4e87250be84769a2.jpg
9/0/b/90b3346b682e5136.jpg
5/5/d/55db381feefd8ebd.jpg
7/a/4/7a4117510f2096f2.jpg
e/3/9/e39d34a805f5886b.jpg
d/c/2/dc28fe6e6e1ec7ed.jpg
e/d/e/edefffb869bac581.jpg
0/a/8/0a8bdae1c572c503.jpg
5/5/f/55fcc1f8975e87bc.jpg
5/c/b/5cb0c3b394f3fc1e.jpg
8/b/7/8b7a0da8d4a8d108.jpg
e/c/4/ec445cbecc6d2891.jpg
1/3/c/13c927e380af453d.jpg
c/7/9/c79ade3bd3ea70a1.jpg
b/d/0/bd0933cd88195121.jpg
f/7/8/f784a3d615824db0.jpg
0/f/3/0f3a16c739642606.jpg
2/5/4/2545f9ccefe11872.jpg
b/f/9/bf94d95c19c17872.jpg
b/3/d/b3d5e081daf34377.jpg
f/4/7/f47e0bbb857b035c.jpg
8/5/e/85e35955fedd1ba9.jpg
f/4/f/f4f4ec3470625a93.jpg
2/6/8/26832f4049e74226.jpg
4/4/a/44ab88c81b11d442.jpg
f/2/b/f2b110ff36dccb36.jpg
d/6/f/d6faac96788f9bac.jpg
a/7/3/a73395eb0e08972f.jpg
3/0/1/301ddf25674aa3de.jpg
6/9/a/69a096f8d3c7261b.jpg
7/0/a/70a07e4b4dcdfa78.jpg
0/a/3/0a3d42de5c94b35a.jpg
0/7/1/0710893634494795.jpg
6/f/c/6fc14b3122e502b8.jpg
e/a/0/ea049acef19fa261.jpg
4/0/7/407241652cbded2c.jpg
c/f/f/cff64531fbc01011.jpg
9/5/3/9537519f1d6369f1.jpg
2/5/5/255c2864acc3e1ba.jpg
c/9/2/c92c3f04371e2e31.jpg
f/6/b/f6bad181aa81f72d.jpg
4/7/3/473e414b68798a56.jpg
4/9/0/490a126b1779c6de.jpg
c/2/8/c28187f1f1fd638b.jpg
7/1/e/71e58a63ae6df5ea.jpg
f/2/9/f294a2513c4a301a.jpg
1/a/3/1a3a7f43e2124086.jpg
c/7/a/c7ac3fae678de4f2.jpg
d/a/2/da2ed74cc1d215eb.jpg
2/9/e/29e6b91519f730ad.jpg
b/1/3/b138dd1e5cf094d9.jpg
9/6/c/96cd9324518128db.jpg
2/2/a/22a4a749bff608f8.jpg
9/6/8/96841c5e7f23a667.jpg
5/5/8/5581513f52cf4d88.jpg
4/6/9/469517ec66460c7d.jpg
d/2/e/d2efa499101e4e57.jpg
9/0/0/900583dccebc17a8.jpg
6/a/9/6a967027bf422831.jpg
1/8/c/18c4cbb396394e53.jpg
5/a/c/5ac4ec4b2383f67e.jpg
7/6/8/768b38f12ae7753f.jpg
c/a/6/ca6697e085d39248.jpg
d/8/1/d81a436e94ab8392.jpg
1/b/d/1bd4cea6ce7dd34e.jpg
0/a/c/0acbfce85ad35d4e.jpg
5/0/a/50af3652d89905a8.jpg
9/4/c/94ce6495791099fb.jpg
e/5/2/e523aa13aa5a7239.jpg
b/0/2/b02db54fbd759bf8.jpg
d/e/1/de116e36fc3f05c8.jpg
c/7/d/c7d185d525b0cc50.jpg
8/9/d/89de2880dc57980b.jpg
e/6/7/e671a426809bcc7b.jpg
1/3/9/139f7cc2926cd3ae.jpg
c/8/e/c8e002dfc58bdbf6.jpg
0/f/0/0f0b4a790c6a7976.jpg
7/c/9/7c9ca74e0ac5768c.jpg
7/d/4/7d40d0c34e03b089.jpg
5/4/7/547f011d40291f5c.jpg
a/5/f/a5fd996ada589f5b.jpg
4/a/6/4a64058ed6ea5fb5.jpg
3/e/b/3eb74b057fce0df4.jpg
9/a/1/9a12baec15195cd7.jpg
b/8/0/b808b223dfbbbab7.jpg
6/c/2/6c2298d8e7b5966b.jpg
a/0/c/a0c98d7736928bc3.jpg
8/7/d/87d1d1e51d2522c6.jpg
3/b/4/3b49a7d79c6c21d5.jpg
c/b/7/cb79e860430c6f2a.jpg
7/0/f/70f3607b76668e20.jpg
5/6/3/563d1887603e67e0.jpg
9/7/2/9721ca8aca2bd512.jpg
8/4/6/8464142c1466dafe.jpg
e/3/8/e38c85e2494bd2ea.jpg
7/2/9/729e9806d349973f.jpg
4/c/d/4cd36ec0dedb9980.jpg
a/7/f/a7f3f1999fee55dc.jpg
6/d/f/6df72a8c77fef25f.jpg
b/1/5/b1506e934f43affd.jpg
b/6/7/b678fe9dd39e3633.jpg
8/4/5/84502685d199be6c.jpg
a/3/1/a31885602a13f085.jpg
c/9/1/c91e971287275cec.jpg
7/b/8/7b8937ef29b0115c.jpg
7/6/8/768e6d3797bf5801.jpg
a/1/2/a12e5047ac00ebee.jpg
4/7/e/47ee25869fe323e5.jpg
0/1/9/0197af97410ee2df.jpg
b/f/3/bf3960534f0428cb.jpg
4/e/5/4e5e0a878bed3f20.jpg
e/0/2/e0201ff50e2238e4.jpg
6/1/d/61dd7654c6b043e3.jpg
6/8/f/68f42d9f2d875057.jpg
1/a/8/1a8dbe52a7525a84.jpg
3/7/d/37d226a95e03093c.jpg
c/b/9/cb9c5095e8ae3644.jpg
9/6/2/962250fe30a8970b.jpg
d/1/9/d19345774a3bf806.jpg
7/4/c/74cac7055079e568.jpg
f/4/6/f468467496cf4ba0.jpg
d/2/f/d2f14c628e2133ab.jpg
6/b/f/6bf43a4a35b9b08a.jpg
e/3/4/e34faee7e7369687.jpg
c/2/e/c2e48689d89a46b4.jpg
e/2/7/e27db1a069d0d2e9.jpg
e/7/2/e72dcf2087c1d9a6.jpg
0/3/1/031f468dcab8c5fd.jpg
7/4/5/745b63b528c8ed38.jpg
6/0/b/60be7533c90d98f0.jpg
c/b/1/cb1591fa83a875fc.jpg
b/3/8/b385fe4dd06514f7.jpg
b/3/d/b3d356323db0bb23.jpg
1/0/d/10d00c7ffa1129e7.jpg
b/c/5/bc5defbdc20e2b24.jpg
0/8/4/084276b15bd93239.jpg
a/1/6/a16848a32d0bedd3.jpg
4/f/2/4f2ca5c191c4cddc.jpg
f/e/d/fed703fc407ea6cb.jpg
2/a/5/2a5d9ad342c0e016.jpg
a/0/e/a0e82e473bcd71de.jpg
f/0/0/f00bcdd988290bc3.jpg
2/3/4/234336dbd694da2c.jpg
7/e/b/7eb8a9ba7287b9df.jpg
8/c/d/8cd42bcc535f64f4.jpg
3/0/3/303fef85cd97d695.jpg
c/1/8/c182ce52b732527f.jpg
f/5/8/f5850347f63f3eae.jpg
e/8/c/e8c731970e7c38ef.jpg
5/a/8/5a864297679dfab6.jpg
3/9/5/3959421082495c93.jpg
8/a/6/8a65131da3739455.jpg
8/b/c/8bcee771e9ec0530.jpg
a/e/a/aeac5a177c503e10.jpg
7/c/0/7c0440e63fc209f5.jpg
1/e/e/1ee4585e17aa0a2b.jpg
9/f/b/9fb4751150742407.jpg
2/e/9/2e924f6cfd95a93e.jpg
d/7/0/d700e6aea8dc0488.jpg
2/3/5/235895897260642f.jpg
c/a/1/ca1f39e0a960f74a.jpg
4/4/5/4450f17245a7b696.jpg
6/2/6/6262af5e58dafffe.jpg
e/1/4/e14e49cf68973629.jpg
8/b/c/8bc86ca08bc91c12.jpg
a/a/3/aa37672e6488c0d6.jpg
8/8/a/88a3562acd9e2b4d.jpg
f/b/6/fb6fb38e0604d3ec.jpg
6/b/f/6bfb2c8ca5ee4ce0.jpg
d/3/8/d389c5ea372faf85.jpg
6/3/4/634732c8a038cfef.jpg
6/9/1/691cdbd59b8d587c.jpg
f/0/2/f0292daee7146e36.jpg
b/0/7/b0753b42361b9e53.jpg
0/0/5/005f72ea10998a8f.jpg
9/9/f/99fe6ba3f084edcb.jpg
3/4/1/341e9bd8ac864ff1.jpg
b/7/4/b74d0ecc9f630711.jpg
1/4/5/145a4cc6f02d7afa.jpg
b/0/f/b0fc68485c732daf.jpg
d/7/8/d781f5aa28f42a1e.jpg
9/e/6/9e6a733e83d4adac.jpg
4/1/a/41a83cfdbc618b11.jpg
8/e/0/8e0c734440395edb.jpg
3/d/1/3d193beae2d1405f.jpg
f/f/1/ff1d89e9a088f3ed.jpg
2/a/d/2add3f5bb004ba02.jpg
0/a/b/0abb0139da4af52f.jpg
f/e/6/fe6cf4ba66b1df7d.jpg
a/6/3/a6393da2f7ab41f1.jpg
9/5/6/956a1463dd414e91.jpg
d/d/f/ddfbdd9f1430da9e.jpg
1/e/2/1e21ebef2d6ad332.jpg
0/2/7/0273f127895337be.jpg
3/a/8/3a8c73705fe79c7a.jpg
7/5/0/7504f1499045ad61.jpg
8/5/0/8508ce103023609e.jpg
f/9/5/f956cadda6db200d.jpg
5/f/a/5fad6970e184ed3d.jpg
a/5/c/a5ccd1b3f1b137fb.jpg
5/7/3/5732470fc46a3319.jpg
f/a/7/fa77ebb6946cfb4c.jpg
b/1/2/b121f79c4fa32f22.jpg
3/8/3/3837d692f698b16d.jpg
1/9/7/19786b051e17e1ce.jpg
f/4/4/f4483ed576c61f29.jpg
c/6/1/c611c6cc11e855a9.jpg
8/b/3/8b31e7b542650eaa.jpg
0/a/2/0a281ed3e30411e6.jpg
b/7/6/b761c6f265ac4dad.jpg
a/5/d/a5de3082543914a6.jpg
4/e/7/4e79de04a5bd77a4.jpg
6/5/3/653326d6858cb7ed.jpg
a/8/7/a87a0e0319193ac5.jpg
9/c/f/9cfd0b21c4998ef9.jpg
5/0/b/50ba14f79c039975.jpg
9/6/a/96a340319ea82094.jpg
6/8/6/6861ef871bd0ec09.jpg
3/6/6/366451733a4be8de.jpg
5/3/8/53897c3729949a90.jpg
4/1/6/41670893ec1ecbf8.jpg
7/f/b/7fb7814b57d7c44d.jpg
2/f/b/2fb56c07a7fa7dd7.jpg
b/3/4/b3407cf0246ab709.jpg
6/e/0/6e02192ba67c7fc0.jpg
c/9/1/c9194cee960b3b68.jpg
5/5/4/554c4afbc0b88aa0.jpg
9/6/c/96c29141607742f6.jpg
4/6/f/46faa650a642e330.jpg
1/1/9/11939c00d57b7eb9.jpg
e/4/4/e44549aecb09c13b.jpg
3/a/4/3a407ea2b7ccdd7b.jpg
c/e/8/ce8f752f8412d117.jpg
0/1/7/01742791c44b793f.jpg
0/e/8/0e89848f0e7f69c1.jpg
7/a/c/7ac26ce7937051fd.jpg
8/e/c/8ecd28dd07ed8579.jpg
6/9/7/6974256c74e42eda.jpg
f/c/e/fce6d294299f52c3.jpg
b/4/9/b49892f67ba3ec8b.jpg
d/c/6/dc62abea38b302d2.jpg
e/c/c/ecc3ab977c1a6c29.jpg
0/e/3/0e3be284177b711c.jpg
e/a/6/ea65465b0c1dd23f.jpg
5/8/1/5812d6601713c7d0.jpg
d/7/1/d718f746a5f3b4d1.jpg
6/2/4/624971818ab4de82.jpg
7/d/3/7d396de90c61e903.jpg
d/2/6/d26bb940d7aa38af.jpg
0/6/b/06b1c493929ad90d.jpg
e/2/0/e204628d6c46fb15.jpg
3/3/e/33e257ba278b5754.jpg
5/b/1/5b16ef33c7d03408.jpg
a/7/6/a76e681b9cad03b6.jpg
e/a/5/ea579371af4f52c5.jpg
4/6/c/46cd78fcfa23b39b.jpg
3/1/8/318b45b65c34c3ee.jpg
1/2/7/127a32f37149649f.jpg
0/3/3/0332ed72266f2a62.jpg
f/a/4/fa44486cddec4667.jpg
6/9/d/69d88ecd02974679.jpg
c/3/2/c32290f98f9d43c0.jpg
d/e/f/def8c8133e05682c.jpg
4/0/2/402d3dba3b4fb3d4.jpg
2/3/1/231436211727d724.jpg
9/d/5/9d5cea8adf7cf3cd.jpg
b/8/7/b87fc8f92e5580a0.jpg
1/7/0/17093132fc727ab6.jpg
f/4/c/f4c374855e66fcc7.jpg
a/9/1/a9185a13704561d1.jpg
b/7/b/b7bd855b3e7439a9.jpg
8/7/9/879b116465030580.jpg
9/0/e/90ee1f1969dd4a3a.jpg
0/1/3/0130e1417eb1afef.jpg
f/e/7/fe7f46bc31fcf17b.jpg
7/f/0/7f0559c0f489b795.jpg
5/0/6/506f4a863a9f0f86.jpg
2/d/2/2d25864d681c87c1.jpg
6/1/b/61b760a260b986b9.jpg
0/f/f/0ffcba105cca1788.jpg
a/6/e/a6e4bdba6a853bb4.jpg
7/f/7/7f7b9da3d7b219a0.jpg
e/9/d/e9db7c708e47b90c.jpg
7/0/0/70082b9718f0fa85.jpg
6/4/d/64d682490449dd46.jpg
7/e/5/7e5ee74fd655495b.jpg
5/8/b/58b8fb9944a4d252.jpg
f/f/1/ff1308c45e659d7a.jpg
2/5/c/25ccd0f8956940b9.jpg
2/8/6/286c02e14c09a895.jpg
0/5/7/0576f40b7ed818b4.jpg
1/6/a/16ac7d51f9420803.jpg
3/d/4/3d4bb0bfa886a87c.jpg
b/f/e/bfeb3fd2d4500594.jpg
3/d/1/3d12c4d4b0145560.jpg
c/e/d/cede2a26167ad79c.jpg
2/0/4/204fcbb055b486e0.jpg
3/e/d/3edf3f6a071d79ca.jpg
c/1/2/c1278725f89a234c.jpg
e/d/5/ed5cf24134c9c761.jpg
d/f/8/df8ec355d9180246.jpg
8/d/2/8d2d097d79aceddc.jpg
f/1/e/f1e720526413e1c6.jpg
9/6/6/96614e5ae25d8b24.jpg
7/2/f/72f6e0f8197b38fe.jpg
e/d/3/ed3fb62a370706eb.jpg
d/1/4/d14b5538fff7de8f.jpg
d/9/a/d9add66c4eea2227.jpg
e/8/d/e8d9739326a4bb86.jpg
4/b/f/4bfc54e2408700d7.jpg
e/8/2/e825cf75a7c13f4a.jpg
a/b/6/ab6ec6b4aada3876.jpg
7/9/6/796493e3490c1b6e.jpg
6/6/e/66e753ecb48a4f08.jpg
1/8/3/183b9032344bbe77.jpg
2/d/1/2d1b580190fd8261.jpg
8/a/8/8a81edb4beefb852.jpg
e/c/a/ecab9000adcbdfec.jpg
6/b/4/6b429eca036cad77.jpg
d/8/8/d8886c05d176d53d.jpg
1/1/c/11c2b107f010a3b1.jpg
0/d/d/0dd960f924ecf868.jpg
8/e/5/8e59fc30fd002eac.jpg
0/c/4/0c474b659877afa2.jpg
2/d/5/2d5feca46682317f.jpg
e/f/1/ef12dd6f2e40fe4e.jpg
0/a/8/0a81a90f3385ac78.jpg
f/7/b/f7b8d7c292342123.jpg
4/5/0/450220d825f812ac.jpg
f/4/d/f4da359fc957a1b6.jpg
6/c/7/6c7edbcfd92a58ab.jpg
4/c/8/4c812585d66d54f3.jpg
a/3/2/a32eb35812db48d6.jpg
5/e/9/5e9e7d592ce69d55.jpg
f/1/0/f10c2f14f061ab04.jpg
8/0/d/80d2da60a381a4f6.jpg
e/9/5/e951944e6dfe32e9.jpg
e/1/1/e11a75e23e5c9968.jpg
1/4/b/14b26687dd030977.jpg
6/2/6/626973918885c48a.jpg
4/5/1/451fbb348d3d920b.jpg
7/a/3/7a3a45eee5b3ccc9.jpg
6/a/2/6a2f3e8dd7c1c29e.jpg
e/3/f/e3fc427d2d832c11.jpg
e/4/b/e4bdb1be96e30d8b.jpg
4/f/d/4fd4ab93e9d33a86.jpg
5/b/0/5b0815db013e3d59.jpg
9/b/8/9b8357b17f20abcf.jpg
3/0/2/302834a5484b8d1c.jpg
c/9/3/c93e1f6b54b59615.jpg
2/6/1/2617141dc0e6d6c6.jpg
3/1/1/3112523858ad9481.jpg
5/9/9/5997353e1345ed0e.jpg
3/9/e/39e70a4ebdf4fc75.jpg
3/7/f/37fa81f593e86713.jpg
b/f/5/bf5c73ec37249499.jpg
b/0/1/b01d230846a55654.jpg
8/f/1/8f1ba8684285f93b.jpg
b/4/d/b4dc7e3aa0e6630f.jpg
1/7/3/17325ae890d6dec4.jpg
f/8/1/f81203fa5892b97c.jpg
0/c/5/0c50199a64cc6058.jpg
9/d/4/9d496491c0af3b03.jpg
3/6/0/36041c2703a26227.jpg
5/d/5/5d59dce9dd73ec7e.jpg
e/d/f/edfdbb51d97f1d1e.jpg
1/6/5/1654f578b908b2ff.jpg
1/4/a/14aba2a92df73eed.jpg
e/a/8/ea804675bc60e616.jpg
2/e/9/2e985d6292d391cd.jpg
5/f/8/5f8c39d942ff69d3.jpg
e/c/2/ec26ffade586952f.jpg
9/a/c/9ac3589e9b1fa98f.jpg
6/3/3/6330e48a97701d27.jpg
e/d/f/edf5801c987faeda.jpg
f/9/0/f90ef1c4ebad96da.jpg
a/1/2/a1227e6ef38363e0.jpg
9/5/7/957b55924f94c222.jpg
d/a/6/da6f8933f9ef2955.jpg
5/0/4/504df1f521600832.jpg
2/7/3/27376a502257dcad.jpg
9/c/6/9c6f52bbd7d3c09f.jpg
d/8/7/d87edc20b6a857d7.jpg
5/5/9/5599c3cbef1e1112.jpg
8/4/5/84534e366a98ad3a.jpg
5/f/d/5fdb8f7693fae27d.jpg
1/c/c/1ccaeaa51ce53b55.jpg
2/1/8/2184013a682aecdc.jpg
0/7/e/07e0797bb175aad7.jpg
7/2/f/72f190a3aabb3b3a.jpg
2/0/e/20e5399e4ad225c9.jpg
d/b/f/dbfc0eb73dcfc527.jpg
e/1/3/e13e1dc1734667d4.jpg
0/5/6/0565d281c8b82500.jpg
3/6/0/3606237cf398f561.jpg
5/1/3/5132624159497169.jpg
9/7/1/971240ba98135513.jpg
5/c/0/5c0755e2deda8824.jpg
f/4/6/f46cb4f1834b0464.jpg
3/b/b/3bbf3adfa109c28c.jpg
e/0/9/e09657bff26c3604.jpg
a/e/c/aeccc6c13321d436.jpg
0/a/5/0a5e8bf908b86728.jpg
b/5/4/b54d731a847de42d.jpg
a/5/d/a5d71cfce2a50e24.jpg
8/0/0/800171d5d0dd3555.jpg
e/7/0/e70f3278f0922739.jpg
6/6/1/6613b2a721cfb833.jpg
b/3/0/b30116ecb59db574.jpg
b/a/e/baecfb9e773f4355.jpg
f/1/3/f13b10799bb7557b.jpg
a/7/3/a73de9273221af8d.jpg
4/c/5/4c5d3a243de43619.jpg
7/a/7/7a7e3045efc2092d.jpg
0/e/7/0e78b93e96cbe1ab.jpg
6/8/1/681200a4b2330a35.jpg
b/9/9/b9974eb8d211fb58.jpg
4/8/8/488ecf8e86b64462.jpg
3/6/d/36dc335f00b9955a.jpg
9/b/e/9be35de96471e617.jpg
8/5/3/853bdf2bad6850b6.jpg
3/c/1/3c160ebd7ff3210a.jpg
e/c/b/ecb40457ae2405f4.jpg
f/f/6/ff6d54f6b11a6678.jpg
4/7/b/47bb0f2067509516.jpg
7/c/9/7c91dfbd1bb7b424.jpg
b/b/2/bb2629f0bad194e8.jpg
2/b/8/2b87b7f2e916bda1.jpg
d/2/2/d22b1be94fe5cf31.jpg
4/7/e/47ed594e1fdde0ba.jpg
b/3/6/b36b01f30b1afe3c.jpg
6/d/d/6ddc2f368c561c11.jpg
e/0/3/e03b902f00c159d2.jpg
0/5/4/0544f9052846bd99.jpg
2/e/a/2ea11bfe857806f9.jpg
3/4/5/3457b6dfa6b62935.jpg
d/8/e/d8eb5a960f73bca6.jpg
a/9/3/a9320406001a354d.jpg
a/a/5/aa536a2e87f6ef4b.jpg
2/c/7/2c721665ea55455c.jpg
9/7/2/972d247298967825.jpg
0/a/a/0aa6b223b42e1f6b.jpg
8/d/5/8d5c74e6d66a9122.jpg
3/b/c/3bc5130ddee5962b.jpg
6/a/6/6a6e88683a8396d5.jpg
d/8/3/d83b4719a1608067.jpg
0/7/d/07d1e91a460ff2ab.jpg
f/6/d/f6d5cb6985bb48be.jpg
b/c/5/bc5513c670da8e51.jpg
e/e/5/ee5ea6850db02b55.jpg
2/0/1/2019a2436edda2a1.jpg
7/a/9/7a95f06449c55c2b.jpg
7/4/7/747e23c97469a97c.jpg
8/0/c/80ccf7bdc37ba586.jpg
9/d/b/9dbaed702f9983f2.jpg
8/8/a/88a73c00534972bc.jpg
e/a/b/eab62f511468cca6.jpg
8/d/4/8d4da00cdf629b5a.jpg
6/9/7/697defa8f2f66028.jpg
4/6/8/4684e913fd327dab.jpg
d/6/5/d65d8cfb236b1802.jpg
1/0/0/100253078b2091cf.jpg
1/7/9/17905c8ad24db84a.jpg
3/a/6/3a6ba842c1480392.jpg
1/9/f/19f1ff2ecdc6cadf.jpg
6/5/1/6518245f63c09aed.jpg
0/d/2/0d2888f58fa72fb9.jpg
8/6/4/8640b8f46f06fdf9.jpg
7/6/7/7671372a3e2dfeac.jpg
9/6/e/96eaba6d735edec4.jpg
e/9/c/e9caaa8d861ae8d6.jpg
5/3/3/533b1dfe69766ae3.jpg
b/8/c/b8cd93f1cb4695fe.jpg
e/d/f/edf36a2a6b80b153.jpg
0/1/8/0187f55c03673ac9.jpg
5/8/5/58517006a7fe72cd.jpg
8/f/6/8f6beeffb020508d.jpg
4/c/9/4c9dd90450d090a2.jpg
1/e/1/1e18b386d3fae100.jpg
6/2/f/62f8b43e266cd141.jpg
8/6/3/86327cce103b44ad.jpg
a/b/2/ab20a110f76d33c8.jpg
4/8/c/48c50d9148a9088a.jpg
5/a/7/5a74db0dcce39525.jpg
a/2/a/a2a440d972e1002a.jpg
0/e/3/0e38a737f54bd096.jpg
7/b/7/7b77b5a6c25b10fd.jpg
1/6/b/16b65968663c1735.jpg
2/d/3/2d313cff3830106c.jpg
9/9/3/993c11aeff5f26b2.jpg
4/0/a/40a9dbd4d75337dd.jpg
0/f/8/0f8bad7625827a61.jpg
5/b/b/5bbe5a749f7cacc7.jpg
e/e/5/ee589d733b2a1240.jpg
3/2/5/325d027f6a02008b.jpg
7/2/5/72552d4c05c5f738.jpg
5/4/f/54fcdab966ad9e59.jpg
a/7/1/a71949001893e61b.jpg
b/e/2/be284fbddf569fc1.jpg
4/2/d/42dc70826b6ffa68.jpg
b/f/4/bf4a3df9d8231ce9.jpg
0/e/f/0ef68a0d0896bd6d.jpg
9/0/e/90eec5797f416323.jpg
9/d/e/9defb8c21fae3543.jpg
6/d/c/6dc48de8e6d67a1d.jpg
0/4/4/04463ea4c7c4e139.jpg
8/d/2/8d27205705853fb5.jpg
8/b/7/8b7b5e479645530b.jpg
b/c/1/bc1f4efa2e9109f1.jpg
e/3/e/e3e5529363ce0b8f.jpg
1/2/d/12d23c198e28e29f.jpg
4/e/b/4ebaf7c52f881bb8.jpg
b/7/b/b7b93f62ca2fe3fa.jpg
3/5/8/3586f2889733a1fd.jpg
d/9/b/d9b2bbc68fb2da1e.jpg
f/6/b/f6b749a307225854.jpg
3/2/1/321550cca83f3a63.jpg
c/9/1/c91dc488b7c8aa76.jpg
2/7/6/27665088ae5e1f34.jpg
3/1/5/315854c091d04310.jpg
5/e/2/5e2c24bbd11ab745.jpg
6/c/6/6c60c84f228ae6b6.jpg
5/2/7/52722d4d7a51c920.jpg
3/4/f/34fb6c92e7650166.jpg
9/d/1/9d198f8fbcbad4b3.jpg
f/a/7/fa7b02500aa7a29c.jpg
8/c/1/8c1a3af390d5c29c.jpg
0/9/1/09112ed933e4499c.jpg
1/1/e/11e4b376f42b7771.jpg
a/0/3/a03e94d66b08be4a.jpg
3/e/9/3e9ae9f1440b4709.jpg
1/d/7/1d7b15b011023826.jpg
c/c/4/cc42c3d822e30705.jpg
b/b/2/bb22e3f816895da2.jpg
3/f/7/3f70ac48bac10134.jpg
c/1/9/c1909047b8c36bfd.jpg
8/7/a/87a4f6bad9b73b11.jpg
2/0/9/209ce5762f6cfec7.jpg
5/0/a/50afb4fe2592a249.jpg
b/1/3/b1363bd85f1cf153.jpg
d/b/6/db65a1e56a84f350.jpg
f/f/5/ff5183275cc03fe3.jpg
4/4/6/446b61d53c24bf07.jpg
3/f/1/3f18b5e144c44432.jpg
3/3/5/33509ca1556db999.jpg
f/c/0/fc0a0d9fc712c474.jpg
9/e/2/9e21662d43581f61.jpg
3/d/6/3d69ab457e2255e8.jpg
c/a/4/ca49a585899c05f8.jpg
9/a/5/9a5120c4e8c38b2b.jpg
3/b/f/3bfa9d19c97b7613.jpg
1/d/6/1d6517d767bbe6e9.jpg
c/5/3/c53da9125ca103fa.jpg
6/f/3/6f3bebe549c4496c.jpg
2/b/1/2b19f06e876e1108.jpg
c/3/6/c3672427a2439515.jpg
9/3/f/93fcdf6740711adc.jpg
4/1/c/41c6287ce0c1e0fe.jpg
c/1/d/c1ddef7d97c5766c.jpg
3/0/3/3032ae97b30d2348.jpg
b/a/5/ba57976dadceea3c.jpg
f/a/6/fa67e611448516bb.jpg
a/6/8/a68147da0d77575f.jpg
7/1/f/71fa26035ba5c811.jpg
5/c/b/5cba19b4f76839e1.jpg
0/4/7/04712433a8379c9d.jpg
7/b/f/7bfd7dd525a764de.jpg
e/5/f/e5f321a240b5aed5.jpg
f/6/0/f608a487f85b131a.jpg
2/9/f/29f14b9ca617f715.jpg
f/1/c/f1cf94236c2e920f.jpg
8/1/8/818d3ddc443b31d3.jpg
9/9/b/99b49c5e882bb2da.jpg
0/2/6/026103eaa741ae4c.jpg
a/0/7/a0780d0f0b8a4772.jpg
2/d/1/2d1b6a1eda59b4ab.jpg
f/3/9/f39705e74790c2ea.jpg
6/d/d/6dd327c9d025ad08.jpg
b/f/a/bfa5d954f23fb4cb.jpg
a/5/c/a5c66623e9ab5e0a.jpg
4/b/4/4b4ec4696253ba1f.jpg
b/1/b/b1b5f64c5f7b2783.jpg
4/c/a/4cad5e426ccbaaf0.jpg
4/0/b/40bf2e9d7811063e.jpg
a/f/2/af2a1c2c6fe2f927.jpg
e/e/2/ee24512a588a3263.jpg
e/a/b/eab3d8912709fbeb.jpg
c/8/4/c8427f3b0aed5556.jpg
8/0/9/809163e1ea0d23a7.jpg
6/b/2/6b288b0547ba56f5.jpg
4/7/a/47a7d6d2b3480675.jpg
6/9/7/6971d82abed335e2.jpg
4/d/7/4d7731fd42323f39.jpg
8/7/0/870245828a647e4b.jpg
e/6/f/e6fd3ce53e633a49.jpg
f/6/a/f6ad64c2f28a06f1.jpg
1/e/a/1ea23a05f7d2c1a2.jpg
6/f/0/6f0296b88f4fdab5.jpg
d/0/8/d08fd741dd02a2eb.jpg
1/5/e/15eab8eecdb23e20.jpg
d/1/0/d10d35e34477a79d.jpg
0/5/2/0523981d805f8728.jpg
4/6/0/460bde99cef314d3.jpg
d/6/8/d68ea62734694156.jpg
f/5/b/f5b57d66ed64bbb3.jpg
d/8/a/d8a4381d7ec6cd2c.jpg
5/0/8/508197878c7ade41.jpg
3/4/4/3440f31a9e74c7ad.jpg
1/e/f/1ef441b090f4fff9.jpg
6/c/c/6cc4b20996f44aeb.jpg
d/6/0/d60fa10842a5e702.jpg
f/c/2/fc2ad94c85b35076.jpg
2/d/4/2d46b771c333ad57.jpg
6/6/e/66e604f0e247f183.jpg
9/a/8/9a8725bf57e15e9c.jpg
4/b/7/4b791620ea7366bc.jpg
0/9/2/0926cda4e9a06468.jpg
0/b/0/0b0ee963978db1be.jpg
3/9/7/3973e84a39a9e07e.jpg
e/a/5/ea597e634f0a747a.jpg
3/4/e/34ed9153387148a1.jpg
f/c/7/fc7d4f067f6b7089.jpg
2/2/e/22e400cea51c90e6.jpg
6/0/1/60124d0863d2d243.jpg
8/a/e/8ae5bcc8c03606af.jpg
7/e/a/7ea555ac79b6fe07.jpg
a/e/d/aedf0634d89ac8dd.jpg
0/5/1/051c9ee465c8c39b.jpg
1/3/3/133dfab61f06acc0.jpg
e/9/3/e935b690b77c55c6.jpg
3/8/9/389d64126f8c93b2.jpg
3/e/2/3e2981836a0032fc.jpg
5/3/5/5356072590b1d9bd.jpg
7/6/3/763ab89dbb13c58d.jpg
1/3/9/139d8242fcef7a3b.jpg
5/a/b/5abe9335c01b0fc3.jpg
b/e/1/be19e5818665f116.jpg
1/9/d/19d98d868dca59f6.jpg
4/2/9/429627dd808564e6.jpg
d/8/1/d818962ec500c0c8.jpg
b/e/c/bec52bd30c4d28dc.jpg
0/6/f/06f4a5b55d84796b.jpg
7/2/2/722d80fe0f1156bf.jpg
2/c/a/2cadddaa679e722f.jpg
5/f/d/5fd37c7ecec61fe9.jpg
4/1/9/4196ff3b0d8fcecd.jpg
a/e/e/aee8d7b93c0e27ff.jpg
b/0/b/b0bd329350167176.jpg
9/6/5/9650325f1c433b8d.jpg
b/6/9/b69796305671a1d2.jpg
2/c/e/2ceb8e91cad07890.jpg
6/f/c/6fcfca35da2637e6.jpg
d/c/d/dcd4bd1d7de0a417.jpg
8/e/c/8eccca00655c386f.jpg
3/5/5/355335afcf62032e.jpg
a/f/3/af3bb3043b8538f2.jpg
7/1/c/71c42646b65aa10e.jpg
9/a/0/9a0a8e716f092ea2.jpg
8/8/3/8830e9cb46ec98a4.jpg
a/7/7/a77a7412ca678da8.jpg
b/6/7/b6714dcabe31195c.jpg
c/0/7/c071bdde7377f290.jpg
b/5/5/b551f9341ab7234e.jpg
5/a/a/5aaedf048620f9f3.jpg
6/a/f/6af1b4c8320eb8f8.jpg
2/8/1/2818d7bbccaa8ed3.jpg
9/1/2/912a2141d87d1b98.jpg
3/e/7/3e766ac79d15cd07.jpg
3/3/0/330f1526749f6a95.jpg
5/c/d/5cd7798719393020.jpg
2/0/a/20a0a40104fa21a9.jpg
b/5/6/b56f8676e9f942c8.jpg
e/b/0/eb0f3508a6f7b513.jpg
d/b/2/db2d9121068f7a1c.jpg
3/f/c/3fc472f6d69bd1b9.jpg
d/e/c/decb21e132da932f.jpg
d/d/0/dd06c96eed7abfeb.jpg
2/7/8/27839d9bd167f786.jpg
c/a/f/caf6a50a97108181.jpg
d/e/1/de1f9c432f4f96af.jpg
5/4/d/54dff190a7d335be.jpg
c/5/6/c569b9cbb5a2c0b9.jpg
b/5/8/b5874082951d61a8.jpg
a/4/1/a41ae38e6ea4b04b.jpg
9/7/0/9701253db806f01d.jpg
0/d/8/0d810bb190967772.jpg
1/9/0/190388fcaeaf59ec.jpg
c/e/b/ceb34b88c17076cb.jpg
1/5/c/15cea141872e1ac8.jpg
f/6/6/f66536b3546f4af6.jpg
4/0/a/40a6f168835b252b.jpg
2/8/a/28a686266a7dcaca.jpg
e/9/b/e9b9acc6e7c42a33.jpg
9/c/f/9cf4fb4b05477a68.jpg
3/f/9/3f995961b4cc8a12.jpg
e/9/2/e9254f0ef72bea7f.jpg
8/b/7/8b7c2aeb98748d12.jpg
2/a/7/2a737ff43ec14627.jpg
7/9/d/79d805815523f7d1.jpg
0/f/9/0f90f3a9b340bff3.jpg
2/2/d/22d61b44618793bd.jpg
8/9/b/89b2a9815ab3e79c.jpg
5/b/4/5b48d152d6c748bb.jpg
c/7/6/c76f7c5e506e8087.jpg
7/a/0/7a05962a93e49f89.jpg
9/a/6/9a6eca419a83e090.jpg
0/1/7/017dd9f271312bd8.jpg
0/0/8/008a75aa1f1a7513.jpg
8/a/5/8a5252557c20c905.jpg
9/4/2/9422e0b0b3c1b5d6.jpg
6/8/4/684e738ed77efe8f.jpg
1/4/f/14f11a74f6d526d0.jpg
3/1/f/31f50700fdb6077b.jpg
d/b/b/dbb98eb6014ec144.jpg
a/8/7/a875ebd27b0209ab.jpg
3/2/1/321ad70ec39fa506.jpg
b/5/7/b5746ddcb4863168.jpg
a/2/3/a2399d0aff278d6c.jpg
7/3/1/73184df02799759c.jpg
0/6/0/0600a5efa61170a3.jpg
a/3/8/a384b411b316769d.jpg
f/2/e/f2e095da5296fc31.jpg
4/5/6/4560da384a4ffa65.jpg
6/7/2/672ac98ae4f44efa.jpg
4/e/8/4e8c56d9d9657ce0.jpg
c/1/d/c1d03db24c03a00b.jpg
3/c/4/3c4c5da7cdb64d30.jpg
9/a/0/9a0eeab142bdfc54.jpg
2/f/7/2f7fbc922f78e322.jpg
8/2/0/82092d459b3d63bc.jpg
9/4/b/94b608239b8c2ecb.jpg
5/f/b/5fb3d060b1c1adf9.jpg
3/d/0/3d0de8de9cb01d03.jpg
4/d/d/4dddc005456c286b.jpg
0/8/6/08638aec1f1769ce.jpg
3/1/6/3163c5d305bda5ba.jpg
5/c/1/5c176a43f0124bfb.jpg
5/b/c/5bcdb85fd3be8fdb.jpg
5/e/6/5e60878d78fd8a1d.jpg
3/c/6/3c6cd79d6c7f3f18.jpg
9/7/0/970e7bd8d382bc96.jpg
9/7/b/97b6ed8f9cf78dc6.jpg
7/0/2/702c17ee0e17b987.jpg
3/6/b/36b326d6a51b6cd4.jpg
a/e/0/ae05544b617a48ef.jpg
2/5/5/2553fd2ab53e611e.jpg
7/7/d/77d3efd9fe23b532.jpg
f/6/5/f6590ff242ffc5ea.jpg
c/9/6/c96e4fceaaa6953d.jpg
e/6/c/e6c851a73cc48292.jpg
f/6/6/f6644393fcbaaf78.jpg
f/e/b/feba6d77549bc55f.jpg
f/2/8/f28f11d4023a24ed.jpg
0/c/b/0cb9c33b0c22a559.jpg
7/0/e/70e49459562bb424.jpg
5/c/6/5c63a30db5363702.jpg
4/c/3/4c374bccb999d9c8.jpg
a/6/0/a6074eebdff1a493.jpg
1/c/d/1cd324a5d89103c1.jpg
1/3/a/13a7e754b14c91d6.jpg
b/5/2/b522bb7bf311096d.jpg
7/b/d/7bd52ec9ba9ff549.jpg
b/7/a/b7ae59b5f458f448.jpg
d/6/2/d6206de41cc30b66.jpg
3/0/b/30b4a3dbd0dc66e6.jpg
1/b/4/1b4ac80c8830d073.jpg
4/b/9/4b9120809b158764.jpg
3/9/7/3975a886910bebde.jpg
e/e/2/ee21bcc0b1c7b131.jpg
c/e/2/ce2cc16e49e64281.jpg
7/f/2/7f24e91ca459963e.jpg
f/d/9/fd992c2cd790d1be.jpg
2/f/3/2f35a88a0ed856b1.jpg
1/0/e/10ed3573a1b0eee3.jpg
a/4/9/a498bdf20b31633c.jpg
2/8/e/28e268e2fcdc64b0.jpg
a/6/4/a6405ad13fffa46f.jpg
6/d/4/6d47947a9407a4b0.jpg
9/f/2/9f2e870391f6372b.jpg
e/6/4/e6445de77250ced5.jpg
c/2/9/c297362b5c60563a.jpg
7/d/a/7da90ceb94fa4db9.jpg
8/f/3/8f3924211c421914.jpg
c/6/7/c675c977147d0864.jpg
6/f/f/6ffe00bee716201e.jpg
5/f/0/5f0807b5d3379b44.jpg
d/a/3/da39377c9f9f386d.jpg
4/9/5/4955f78dc6f39d9e.jpg
8/5/a/85a91441f2d34f7d.jpg
4/d/6/4d6b1f74a21178e5.jpg
4/2/2/4223e8173ce01695.jpg
3/2/2/322f2b8897ecbdff.jpg
8/e/d/8ed15871bc3c32e9.jpg
5/8/4/5840f52a151cb6c0.jpg
f/2/a/f2af68c17935f365.jpg
6/3/1/6314d137c0bae98b.jpg
f/e/a/feaae2b5dedd8a44.jpg
b/e/2/be2b1be4697092dc.jpg
9/a/2/9a27c2f18d737148.jpg
7/c/9/7c9eb6d53e98e77e.jpg
1/7/2/172999b2cc578a66.jpg
8/3/2/8327ec1243899c11.jpg
e/d/7/ed77d4f562272cde.jpg
b/0/c/b0cca170edffde0b.jpg
a/2/6/a263751cf3b9d364.jpg
9/9/8/9981810cd64b2e5b.jpg
b/8/9/b897ea4300767588.jpg
1/2/7/1272ef793ebba7a2.jpg
3/f/5/3f509df1d66997a0.jpg
5/3/a/53a0e30cefeb270e.jpg
4/6/f/46fac224fbcceb9b.jpg
d/7/8/d78f68dca62a23fa.jpg
8/b/7/8b72631faf6b5c25.jpg
2/0/f/20f72c5f673147ae.jpg
b/4/b/b4b62be4e7be506b.jpg
0/4/c/04cafeec255693a9.jpg
7/b/4/7b420ca6d9c8aaa0.jpg
3/3/8/3382c9c9ef256892.jpg
d/a/a/daa247c61e141b48.jpg
1/6/5/165bce194c21d16f.jpg
9/7/0/97002529f28690d4.jpg
8/e/c/8ece5608a5efd44e.jpg
4/0/f/40fb1889ba32cf19.jpg
f/e/f/feffbee21ec3b3d9.jpg
a/4/7/a47de8f08160ec25.jpg
3/a/b/3abeb4def244b025.jpg
c/9/0/c90ec15d9f62915c.jpg
8/a/b/8ab651958b41d596.jpg
1/f/7/1f7bb0531ad09004.jpg
8/0/8/808c4a4c9674c028.jpg
e/7/c/e7cd6eea55a74c82.jpg
3/8/2/3825f9734c350d09.jpg
5/f/9/5f9acbca1f4d32d3.jpg
e/5/7/e57c2f8163fb82e7.jpg
7/9/c/79cd9e912af7d537.jpg
4/8/f/48f0abec3e0b4834.jpg
c/2/3/c236e830a9e7baae.jpg
c/e/f/cef20472e47484ef.jpg
a/b/0/ab026f34177c6be3.jpg
c/2/2/c226df345c9bc24e.jpg
1/5/8/1586149c8c2c3e0f.jpg
3/a/1/3a13cc628d536e75.jpg
0/f/f/0ffc823fb33df971.jpg
6/0/2/602bf5b5d54ab63b.jpg
6/b/c/6bcd4499a2e03f1c.jpg
2/8/8/288c131e0826f716.jpg
c/a/e/caed98328e9d669d.jpg
2/3/f/23fdd469aaa0e4c4.jpg
8/0/6/806929e253fc9d2c.jpg
9/e/b/9eba08be124531ba.jpg
a/5/8/a583b71d3489c6af.jpg
7/7/b/77bb62dfbfd485ae.jpg
5/b/0/5b034f3a422d3932.jpg
d/b/a/dba91d87c2eabbb3.jpg
8/7/3/8735e143f0764156.jpg
e/d/9/ed92f5b3776d69fd.jpg
7/1/8/71822499b479b1e6.jpg
5/0/1/501710d0e1251949.jpg
6/d/f/6dfda18a4d8487b7.jpg
3/1/7/317ae372e6a07bd2.jpg
2/2/2/2225c2bd7b6a267c.jpg
0/f/1/0f18a45e76bf25cb.jpg
0/8/c/08c05baf7a7052b6.jpg
c/b/2/cb26ed180e22b0f8.jpg
6/0/b/60b0aefb8251f507.jpg
2/a/3/2a33890992aaf71a.jpg
8/6/3/86346d745f133453.jpg
8/c/a/8cae75dc5a7860fb.jpg
d/1/1/d110965876c8c281.jpg
a/9/8/a982fbf203a3168f.jpg
e/f/8/ef8febdebf876d99.jpg
6/7/b/67bc6a51bfe8423b.jpg
d/2/3/d2323c8eef3e68bb.jpg
1/d/4/1d435abe24676034.jpg
1/f/0/1f0179146a5c8929.jpg
7/c/9/7c99b0436a057080.jpg
9/d/8/9d850e499834842a.jpg
1/b/6/1b6f5f790e997639.jpg
0/2/7/02703697e0887862.jpg
a/b/c/abcf54ef807e96a8.jpg
0/a/c/0acd1505be03a05a.jpg
9/c/2/9c2fbad3c9d69ecf.jpg
5/9/d/59dea7cc83d35bcf.jpg
5/0/7/5075dfb05d9b4e15.jpg
9/6/0/960ae4df0ea8333e.jpg
b/e/5/be593e70db6ae6be.jpg
0/5/4/054e2cd2893cb8f4.jpg
9/b/8/9b848041a17f815d.jpg
9/e/3/9e3c1f5380576164.jpg
9/e/4/9e4d59bd37028681.jpg
1/8/0/1809f3b582e8b1ec.jpg
e/a/5/ea59d866b8a02d78.jpg
0/6/d/06dfbe1ee7bb7f45.jpg
b/0/2/b02cf8181c2bacbf.jpg
1/b/a/1ba596ab7ccb5ac6.jpg
6/5/9/659c7a2b29f770db.jpg
1/c/0/1c023a3f1c671941.jpg
5/a/0/5a067ec51cd27f9a.jpg
4/2/d/42ddd1a8b812cb08.jpg
a/3/4/a34aa26aa48ea59d.jpg
9/8/3/98352c9c8e589df2.jpg
7/2/b/72bf3de465cd8592.jpg
c/4/a/c4ac32c93546964d.jpg
6/e/f/6efa6149a856e8ca.jpg
b/2/7/b2722744059ea658.jpg
0/e/f/0ef18f9ce5161886.jpg
b/3/8/b38f2815e7861633.jpg
b/e/d/bed4c7b7221ba482.jpg
1/e/1/1e1ef8910a6dc9e2.jpg
c/a/f/cafc62aa90e0f47b.jpg
5/1/8/518496b855252980.jpg
5/f/1/5f145fb19b440071.jpg
5/8/f/58fef565664b3031.jpg
6/e/b/6eb4415e5076ce31.jpg
9/d/f/9df4b83fa5892d3a.jpg
a/f/e/afea4ed80545dd6a.jpg
3/7/a/37a50e4be515bf92.jpg
a/3/d/a3d8c0143fb60d62.jpg
8/5/e/85e2a0eba522f236.jpg
5/4/5/54560a4eb4dc8b20.jpg
0/c/f/0cf5a8766e8e0bb7.jpg
2/3/4/234916363b5e80cb.jpg
c/b/8/cb891a68809df780.jpg
b/0/a/b0a7a96daf7d7148.jpg
5/c/1/5c1d89b29632022f.jpg
a/7/e/a7ed7a2189547989.jpg
b/9/8/b9888951d6722b58.jpg
f/c/c/fcce07866458ac97.jpg
3/8/1/381864fff4b8f368.jpg
3/b/4/3b4c21a106a9fe3b.jpg
b/9/e/b9ebacba1497260c.jpg
c/b/c/cbce4760cb1f41b3.jpg
1/4/1/1412d08f1d143fe4.jpg
d/7/7/d7754b0411f6f984.jpg
0/f/a/0fa96996000e6861.jpg
3/7/6/3768f6f9e36eb0da.jpg
2/9/4/2943dd08f4ecdaba.jpg
d/5/c/d5ca66e8b5b09fcb.jpg
e/6/f/e6fd7f4afd8b563f.jpg
a/c/b/acbce2b4ee85824f.jpg
1/b/4/1b499acadda296b3.jpg
9/6/4/964e2390cb7e6e7c.jpg
e/6/b/e6bf7dd6723f5ad8.jpg
5/f/7/5f7ab85e853d832d.jpg
6/c/1/6c19fc053aba4f09.jpg
c/5/5/c55da495a90f0ef3.jpg
8/6/6/866ddfb9a16bbe24.jpg
5/4/d/54d26aef0e52b0bb.jpg
5/a/8/5a880d7643cfeb57.jpg
f/a/1/fa1a12a2cb82c262.jpg
f/f/9/ff952609ea9bee10.jpg
6/e/d/6ed0a68f85d354c3.jpg
b/0/2/b02e018d50dbda52.jpg
c/3/1/c31b79dafecc0be7.jpg
c/a/4/ca43e67b33f95cf6.jpg
b/d/f/bdf1a82b2c3dec23.jpg
0/6/1/0614a3af3d135fcd.jpg
5/5/a/55a241e33ab0efe9.jpg
1/d/2/1d2d9ac3614b8fd7.jpg
1/9/6/196e119911866b4a.jpg
a/7/a/a7af585da82dcd28.jpg
7/d/1/7d13502d4cebc047.jpg
f/a/7/fa73941dd9cff8af.jpg
2/8/f/28ff00a7ff955b4d.jpg
0/8/1/0814c9e1511ee2e4.jpg
6/4/a/64a7bdc3a48632e6.jpg
7/c/2/7c21f23cc39c4219.jpg
8/d/9/8d9ae8a48f750282.jpg
0/d/1/0d15ec3c2ccfb48c.jpg
b/d/b/bdbf6afff0cf4ecc.jpg
7/2/f/72f45eb5b627eda6.jpg
f/5/4/f54a07daf7188648.jpg
c/7/3/c73726da3447c77d.jpg
6/4/a/64a5351697fa15c5.jpg
8/f/9/8f93c241e0522b49.jpg
e/1/6/e169dd0d9ac311bc.jpg
d/8/8/d888d30af20ba6e9.jpg
4/5/6/45657aaa78f2ac99.jpg
b/f/8/bf81484bd77b3251.jpg
a/5/b/a5bbe6c32b037088.jpg
a/f/9/af9a1edbe2e059fc.jpg
a/e/2/ae2705a5c69880ef.jpg
6/1/4/61401fc1dee21307.jpg
3/1/7/3174fe8a54f0ebae.jpg
7/e/5/7e52a92541451e7f.jpg
e/d/d/edd54d708bc458ee.jpg
7/6/4/764f72349eca0e99.jpg
b/1/1/b11c8a1d59f739b0.jpg
7/9/e/79e1e10d64f7f296.jpg
7/f/4/7f40dd8d0683bf5c.jpg
c/a/3/ca325169be39306d.jpg
5/d/e/5deb643425b51fdc.jpg
1/2/9/129a2db51b374607.jpg
c/e/b/ceb7f104a5fef294.jpg
3/a/4/3a42045782e8f735.jpg
7/a/9/7a9119c28e17b08a.jpg
0/0/2/002f2b27b369a792.jpg
d/5/6/d566b0630ccc6a05.jpg
5/e/a/5eaba61b0b70c55c.jpg
f/f/4/ff482c906125e571.jpg
6/8/6/68615ae2455909f7.jpg
b/4/a/b4a15e30bb1fb569.jpg
d/0/b/d0b535e2f2769ed2.jpg
0/a/9/0a9dba37d4fcb5d3.jpg
0/f/8/0f84b7510fcacf1b.jpg
4/8/d/48d051ab168711c2.jpg
9/5/2/952e3356b6bfad0d.jpg
8/7/b/87b87b7b78b9f4b0.jpg
e/8/e/e8e6facdb0c96c30.jpg
a/7/4/a741548bc2b7137f.jpg
e/e/7/ee7bf8d92a794f4d.jpg
f/d/3/fd327857d5708d9e.jpg
e/7/4/e740dbb67893a218.jpg
d/c/e/dceff47d91f0e7df.jpg
1/d/9/1d9c2f9a967170af.jpg
4/3/a/43acc6dfc648ee27.jpg
d/8/2/d8207c9ecede2c17.jpg
7/6/d/76dc4e1884385e42.jpg
0/0/6/006b7c6427f9a68d.jpg
e/0/b/e0b5a736b6e7e6e5.jpg
7/1/e/71e3c8fcdcc426ca.jpg
5/e/5/5e59e53386423d59.jpg
4/7/a/47a83443522c7ea7.jpg
4/7/9/4794a3b2e5aaf430.jpg
1/1/d/11d44d78d8dab70e.jpg
d/6/0/d60ac449157f276d.jpg
f/2/6/f266818a78f54c9b.jpg
f/9/e/f9e4ed2a73b39f78.jpg
7/e/5/7e50449d82da6510.jpg
1/1/6/11621dcc60cbe888.jpg
2/9/c/29c15cf74eff9c1d.jpg
b/1/b/b1b9b7c0cf8ec2a2.jpg
c/5/9/c59fbea4096d56d7.jpg
0/9/1/091a8d45de02ce2a.jpg
f/6/a/f6ad27f4e04b7a57.jpg
1/3/d/13da2089ec8e988d.jpg
c/5/b/c5bda769d3e4f5d2.jpg
c/a/5/ca55a7e5aebd7487.jpg
a/0/5/a05fdc52e871388a.jpg
5/0/3/503168e73ffc8545.jpg
a/b/4/ab4b100bf2ef29aa.jpg
4/d/2/4d2e86c157f2b39d.jpg
0/1/b/01b4e8d33adf2d16.jpg
1/b/8/1b82d963b840db42.jpg
b/6/3/b63029ebc927d47c.jpg
5/b/c/5bc45d1b8e960d08.jpg
3/7/0/370890a5144c9a7e.jpg
f/b/f/fbffc0df6c0d3bcb.jpg
0/b/0/0b0b9818df80b2fd.jpg
c/d/0/cd0370b4625c5205.jpg
3/6/2/362f0bcbe901526f.jpg
f/5/3/f538d082964c8f0e.jpg
6/e/d/6edd4a885a33ba7b.jpg
5/7/d/57d5b2b1c6fa6f04.jpg
8/8/0/880f4ce9605b9ca1.jpg
3/4/4/34425b3d3508974f.jpg
4/b/d/4bd2556de84960a3.jpg
c/5/5/c553f701a34709f2.jpg
f/e/a/feaa60414e4d5c2f.jpg
c/9/2/c92b406128640d3b.jpg
3/7/f/37f005759f2d73a5.jpg
1/4/d/14d2c39c11a8dc09.jpg
1/8/8/18897f55f7c6200f.jpg
7/3/0/7308c490d19dccb2.jpg
f/9/5/f9518600f05ac0ce.jpg
b/9/2/b9296abeb9c7a33a.jpg
9/8/c/98ccc6ff0186d748.jpg
2/7/2/272ced985dec40bc.jpg
4/2/5/425717f3249bd27a.jpg
0/b/0/0b05dd6045e0b07c.jpg
1/e/8/1e80b0453d459d9a.jpg
5/a/7/5a7c4a70418f7221.jpg
f/c/6/fc690f1d43f20377.jpg
a/1/1/a118f8d3fa85754d.jpg
c/f/6/cf60195ffe7194a0.jpg
e/3/4/e347ea878d6170b9.jpg
a/5/d/a5d3dcbb2fb22e24.jpg
4/a/3/4a33fd1d80164a95.jpg
7/b/0/7b023f9922d92ed3.jpg
9/3/8/938727ad6b31ea83.jpg
d/5/0/d50f043c7486d01d.jpg
f/f/9/ff9446feca0ac42e.jpg
e/6/3/e63cebce54266b0e.jpg
f/c/9/fc9832ce0cc19f24.jpg
f/b/1/fb1573a95cf03b46.jpg
e/3/b/e3b36371eb939e8d.jpg
d/8/3/d8324ce09c639603.jpg
a/d/8/ad8f3048d1e6d027.jpg
d/1/5/d154c0d261a9715a.jpg
b/2/2/b22282fcee44ea2e.jpg
4/c/a/4ca1209d35e9add5.jpg
d/e/e/dee532b85cdc8004.jpg
7/e/7/7e715b0f8872a937.jpg
f/e/7/fe747502f22325e2.jpg
1/f/3/1f342e3aa2a485d1.jpg
8/3/9/839267d24bdd5b1c.jpg
3/6/a/36ab7dabd23c0017.jpg
4/b/9/4b92216b035d13c2.jpg
9/0/0/900c07af61c7c069.jpg
c/8/0/c80f9a49a64b3e4f.jpg
0/9/1/09144b573a35e75f.jpg
3/6/e/36e9e8bab076f33e.jpg
9/7/3/973e419e26d8293f.jpg
6/f/d/6fd2b6f223088bcd.jpg
b/e/2/be24e2be0c9d09ba.jpg
6/4/1/641a23fc9d84ef61.jpg
0/a/6/0a6ad369fd59c104.jpg
4/e/8/4e8d21be64490242.jpg
e/0/e/e0e03186beaba55d.jpg
2/2/4/22431629cca32978.jpg
e/7/5/e75af5887d25b664.jpg
f/c/9/fc93f548b4c33549.jpg
9/4/0/940451a76eb41325.jpg
3/6/a/36aa148c1cdc8e79.jpg
6/f/3/6f3854d0ffcbbd56.jpg
2/b/c/2bc4139cd3d9c1c8.jpg
f/c/4/fc4e7aa10c76a974.jpg
9/a/f/9af9699b3f97a773.jpg
9/6/3/96314cd0781d99e1.jpg
1/f/4/1f4e272742ab5502.jpg
9/d/d/9ddf3894cf542b63.jpg
d/0/2/d0207fb646569427.jpg
9/7/5/975550d9b2ec11b5.jpg
f/e/2/fe2c2afdb1f94f4b.jpg
4/4/9/449188624635ad7c.jpg
a/3/4/a34207cbe407af1c.jpg
4/a/e/4ae91d3553854ae4.jpg
9/5/9/9591933ae8822fc4.jpg
d/c/3/dc3dcb613742aebb.jpg
e/c/2/ec2484173379aef0.jpg
f/b/1/fb1f762b9b9b0ce5.jpg
1/7/1/17179749ecbaa8aa.jpg
e/4/d/e4d3f18df47a3526.jpg
f/6/4/f648cd83bf1036aa.jpg
d/4/a/d4acb8f0ee41cb0b.jpg
9/5/7/957230e8120d8810.jpg
0/8/a/08a26538bf8ec882.jpg
3/8/7/3872fdd424b732b3.jpg
b/8/2/b82a15730234ce8d.jpg
1/3/b/13b01369c2eda354.jpg
4/4/9/4498c248e7692cd6.jpg
7/f/0/7f00093a15e0dddc.jpg
7/4/a/74addbba2da443c8.jpg
e/5/f/e5fb84b32e52f735.jpg
2/2/2/222a7001e861c6ff.jpg
8/4/4/84440c174553de15.jpg
3/3/3/333590d1f2676551.jpg
2/c/3/2c3d29ad58d52bd6.jpg
a/1/f/a1fa85d5b3386f02.jpg
0/c/7/0c78872d05bd303e.jpg
f/7/0/f70af1af27b2113c.jpg
1/3/5/135c4c52d256fddf.jpg
f/8/c/f8c65e365b3b2532.jpg
b/5/8/b58147a3cf3a68b6.jpg
c/7/c/c7c254b7c753de37.jpg
9/1/2/91212a77c17e30cd.jpg
9/1/e/91eacc90233d7c31.jpg
a/c/a/acadb11650c98f86.jpg
5/e/a/5ea97a2fc9097828.jpg
6/c/a/6cafcab2c0e0c5e6.jpg
b/2/2/b22df33d7b6b7c30.jpg
2/8/d/28d991555ace55e5.jpg
6/f/8/6f830e0b656e9b86.jpg
3/3/4/334f227c4663651f.jpg
9/5/8/958e5ce6717c5425.jpg
5/c/e/5ce4a497b63fada6.jpg
c/5/a/c5a7482328a442d4.jpg
6/8/5/6851524fc5b2654e.jpg
e/0/b/e0b14804c9ed5647.jpg
4/3/3/4338cf02a0f228d8.jpg
7/2/f/72f57f49a665a5c1.jpg
3/9/0/3907d4eb682d3c99.jpg
1/d/2/1d23e1b250b1bc51.jpg
7/3/8/73887e7ab4314afa.jpg
f/c/1/fc1c98fc864b14ae.jpg
1/2/9/129291882fe57a93.jpg
2/f/5/2f5c1f276d9641ff.jpg
d/5/5/d555a900dd42e6e5.jpg
2/e/7/2e7eb8f8fcc4cf5e.jpg
4/4/f/44f9a1c05dbeebc4.jpg
a/a/e/aae1884fae88c2a1.jpg
d/b/2/db22fe70acede454.jpg
3/f/7/3f7347a9da2027d2.jpg
d/2/b/d2b80f443e7257f1.jpg
a/3/c/a3c5676d0ee57dd4.jpg
4/c/c/4cc0aab4ce567563.jpg
8/2/8/8286d0f93207a81f.jpg
3/7/3/3738f7ed4b794d9a.jpg
f/d/c/fdcbb733e27e64b8.jpg
4/3/f/43f1521f336fd1e9.jpg
3/6/3/3637503faa99d495.jpg
2/6/9/2695f325097a9c4b.jpg
d/7/d/d7d030c77f64311f.jpg
d/4/b/d4b56d09a04dcd4e.jpg
5/c/3/5c3f60c987651997.jpg
3/1/4/3149e8e6ba48ce6f.jpg
2/4/1/2419ed9a3e77fb30.jpg
0/5/0/050c196c149f1b7b.jpg
6/0/7/607dbd786552e911.jpg
4/7/c/47c75ffe23b4d1bd.jpg
e/e/c/eec658d186bb3a1e.jpg
b/9/d/b9da7bc9927adcd7.jpg
5/b/9/5b962296ecc28bec.jpg
b/5/5/b558645836f1d3a8.jpg
b/a/8/ba8fcab3c10e81b6.jpg
5/9/3/593bbddba076fb87.jpg
9/2/f/92f89aea74c9c105.jpg
1/7/b/17b18e6f46261918.jpg
5/7/1/5714db545198f06d.jpg
2/3/5/23503d8ab2b09226.jpg
9/7/5/975b6924c39c0879.jpg
f/7/7/f7777887838389c5.jpg
7/d/b/7dba76d4a3e501f6.jpg
e/0/1/e01256a7746135cf.jpg
b/d/4/bd4f5c261342defb.jpg
c/a/a/caa9f55bf225f125.jpg
8/b/3/8b34184b7abcb867.jpg
b/e/c/bec8652af6ad4cc9.jpg
c/e/7/ce7f11dee4c14b50.jpg
6/1/c/61c37fcaa5e98751.jpg
0/f/b/0fbdc808fe7b2ee6.jpg
9/9/a/99a8dfdd72679c30.jpg
1/a/2/1a25d22bf30b548d.jpg
c/4/e/c4e7758da7085f4e.jpg
6/8/b/68b715b9deba2edf.jpg
1/0/c/10c8d4d464714ebb.jpg
5/1/3/513a197ea317dec6.jpg
f/e/3/fe3da18d5e4ac511.jpg
2/9/b/29bbea4e9908ffd4.jpg
c/8/0/c804cd7793df170b.jpg
6/9/5/695ffe814349b99e.jpg
c/d/1/cd1b64669b88b725.jpg
0/2/4/024a8c1249ad9816.jpg
b/e/8/be8cd673e532e8cf.jpg
1/4/e/14e31b7c0fe08355.jpg
0/d/f/0dff5ba5135ab5ed.jpg
4/5/9/459341c9f3c8cf93.jpg
9/2/2/922e8ac6d800a25a.jpg
0/5/4/054560751af7effe.jpg
f/5/d/f5d1ca797fdab3f5.jpg
4/9/7/49733b07c0d98b61.jpg
d/e/b/debd70915bde79ed.jpg
4/3/d/43dc14bcbede4cdc.jpg
f/0/6/f06509985e345854.jpg
5/e/0/5e00baab02a969f3.jpg
8/5/5/85573caa99bcfbe5.jpg
c/1/9/c19fc892f4fbc696.jpg
3/0/e/30e607edb4b47974.jpg
2/f/7/2f7dac90f75c9d2b.jpg
d/4/d/d4d34bdd248a3920.jpg
a/d/d/add74fc102f78eda.jpg
a/9/2/a92a8f341972c170.jpg
9/3/7/9370c2b2f58965e5.jpg
f/f/e/ffeede234c594fb8.jpg
7/6/0/760bf9a42b2ef283.jpg
7/e/2/7e2a98e88997a09e.jpg
8/3/a/83ab744aef493af6.jpg
8/c/4/8c4b77102ba27093.jpg
8/7/b/87b7ad260d2a7b52.jpg
7/8/c/78c703ad818d6eb2.jpg
a/4/5/a4564cb7027170c3.jpg
1/1/5/11547e2d297ca51b.jpg
a/c/7/ac73d61b37153663.jpg
5/2/8/528bfb720b2e4301.jpg
9/e/0/9e0f2511ef2074ca.jpg
0/1/c/01c6123f594d553a.jpg
1/9/c/19c2d8567ee4fffa.jpg
d/3/3/d3379091939a77f7.jpg
4/3/7/437a487e76a878bb.jpg
8/c/3/8c3f10f8b2317f5c.jpg
3/6/b/36b4eab931e8040e.jpg
f/f/1/ff1b785113117e4e.jpg
2/c/0/2c0bd7dcd38140af.jpg
0/c/1/0c1691a3e6300b4f.jpg
e/7/9/e794cd5a46c80a31.jpg
1/f/c/1fc0d940fc134be2.jpg
0/4/d/04ddadfa5dd4ed2f.jpg
b/0/c/b0c7a3ea2c8a71c6.jpg
c/2/3/c23a4f5ad28bd6b8.jpg
7/c/0/7c00161b8df0d0b2.jpg
3/3/0/33093caaf47119dc.jpg
2/4/e/24ea18a723f3c13d.jpg
2/c/0/2c08892a67a522b0.jpg
f/7/9/f79c4c11eb4a0fe9.jpg
d/5/8/d58d8441fdb6fb20.jpg
0/b/c/0bc4e75ee59b37ab.jpg
5/7/e/57eb78b8999d372c.jpg
0/c/4/0c4dc65b3134ea39.jpg
5/6/b/56b2628d4c35e51a.jpg
d/d/8/dd88cc9857c51dea.jpg
0/5/0/050591508f9cdebe.jpg
b/b/4/bb43804fe1ee2d0a.jpg
5/6/c/56c9b5a1387fb06c.jpg
3/5/e/35e6a6dcbfb45472.jpg
c/6/d/c6d90412adb6a178.jpg
f/c/c/fcc00673b93c3e49.jpg
e/d/b/edb8c80cbc86102f.jpg
2/3/d/23d685eed753efcd.jpg
f/8/3/f830cf3ea07ec871.jpg
6/7/1/671e15027ba62fd5.jpg
d/2/d/d2d0dec52834fe92.jpg
6/2/f/62f364a75e8448d8.jpg
3/0/c/30c241bdafcc45da.jpg
f/5/9/f595beef512de34e.jpg
0/0/9/009a3dd7b808615c.jpg
3/5/d/35d244187f4af92f.jpg
1/a/8/1a821395c1563bd5.jpg
d/c/0/dc0dda1a5e79894c.jpg
9/e/b/9eb33759c3f1bce6.jpg
7/7/b/77b90a99e2fbfc01.jpg
0/3/6/036345968a6ab202.jpg
4/2/2/422fd0051d3f3af0.jpg
2/f/a/2fa1df7892b3bd69.jpg
0/8/4/08417f43c5639362.jpg
c/c/a/cca0b273ad0cee56.jpg
4/e/1/4e1c60abe3b03bb8.jpg
4/a/a/4aa311a0781f2cfd.jpg
0/e/e/0ee26471936c3bbd.jpg
e/8/8/e885b4dfb66af968.jpg
7/4/5/745e583de9966f2d.jpg
5/0/7/507019d5ed6ef222.jpg
d/a/3/da34e4335b555f2f.jpg
7/c/1/7c15fc9ef0aacd8c.jpg
b/e/a/beae96e729d147c0.jpg
a/c/8/ac8869284a2b1dc5.jpg
8/9/4/8948ca88bcf07b3f.jpg
d/d/f/ddf8cde83be637c5.jpg
5/6/9/569e644ecfa61125.jpg
4/b/5/4b510897f8f104e8.jpg
3/a/d/3adc04a3078cb836.jpg
f/c/5/fc5937e55028d8ad.jpg
a/8/3/a83e7a2290a3dfb0.jpg
4/f/0/4f042d39ae908aac.jpg
8/5/1/8519ae27f2dbdf4f.jpg
5/f/8/5f803a7791bc8777.jpg
8/a/e/8ae72dea57ed804c.jpg
1/c/0/1c08dafceaf028ff.jpg
b/3/c/b3cc5d3d7b5fd981.jpg
f/6/3/f63237671f3c9e15.jpg
a/4/8/a485b8f15f2239c2.jpg
d/f/9/df9df7b968786e97.jpg
5/3/a/53a0908331270fb1.jpg
a/5/d/a5d86db36c8284d4.jpg
d/6/7/d67e52d84e606f1c.jpg
4/2/0/4205a87567bb76aa.jpg
b/c/3/bc3ed8a06d4a0f92.jpg
4/c/8/4c86b4e34a7c69e1.jpg
0/f/7/0f70d1dacbc11ded.jpg
d/1/5/d15780988edfec34.jpg
4/4/9/449ef110927bfce6.jpg
1/3/c/13cc517e1a5beb86.jpg
1/3/b/13bee0e4a9c3a75a.jpg
2/8/3/2835b47d0ae9b3b7.jpg
2/c/9/2c9b52a6136a86aa.jpg
6/9/f/69fec67f200d86a8.jpg
d/5/0/d508232026fcd193.jpg
6/3/a/63a9514fb196b909.jpg
f/d/0/fd009de77752287f.jpg
4/a/b/4aba9ab2f416df88.jpg
3/9/c/39c013efdf6a0c83.jpg
f/5/f/f5ff5d2458bbf725.jpg
1/6/f/16fc516855490f5f.jpg
6/0/d/60d8373e318cf90c.jpg
1/4/a/14a3781fb14332bc.jpg
1/a/4/1a4acd30453db1ec.jpg
4/3/7/43750efeab6a5663.jpg
d/a/5/da572abf3d50cb52.jpg
f/5/3/f536f121fb3f2691.jpg
b/4/b/b4b48f7a9adbe80f.jpg
1/9/4/19403c07a0ef005d.jpg
4/1/9/419ed8cecddac929.jpg
a/3/3/a33e9627d888d853.jpg
b/8/0/b80f20dd90d6d29b.jpg
d/7/f/d7ff6630b3303749.jpg
5/0/b/50b7ffc3e3b410a3.jpg
d/8/8/d881a9285c31b404.jpg
9/e/9/9e9cd791224a2295.jpg
1/d/8/1d8078c07a5ce64c.jpg
d/6/d/d6dd7af74bb0981e.jpg
6/3/c/63cd8885e54a9843.jpg
2/4/b/24be617ce2a0db9e.jpg
c/b/5/cb58003e21277959.jpg
2/c/d/2cd0680090a26eca.jpg
5/d/e/5de881d5d0d4b995.jpg
9/a/6/9a68d63a78d14db3.jpg
b/9/c/b9c9bb0dc952ade5.jpg
2/2/b/22be2083d5055867.jpg
a/8/9/a899b6c0fcb48702.jpg
1/c/1/1c1195423e266a50.jpg
b/c/9/bc96294b52910f6e.jpg
0/6/b/06bf00868a18d1f0.jpg
b/0/2/b020ac1b0aa4b3f1.jpg
1/1/d/11da31d27b9c299d.jpg
b/b/1/bb1252ebb1540071.jpg
9/9/b/99b51ec9c1681329.jpg
7/4/d/74d880ea03a796f3.jpg
b/c/8/bc874f1c9aa927f9.jpg
a/7/5/a75e6bbadce160ab.jpg
f/0/c/f0cec2df93c9489a.jpg
c/1/b/c1bd65b9061ac939.jpg
f/2/f/f2fa3b313e64f9da.jpg
2/c/b/2cb907b979786bca.jpg
b/f/e/bfe7b1dc95bc4801.jpg
4/2/1/42118ba9c88c7df2.jpg
1/7/b/17bbc8538b09bf97.jpg
c/2/1/c2125c6a5b3caee4.jpg
6/c/c/6cccaf90c349e76b.jpg
5/0/6/50667d2e293ff42f.jpg
1/e/a/1ea393f7a0efd95b.jpg
b/5/2/b528b5eb45981ba8.jpg
7/f/4/7f4d120db91d2fbb.jpg
e/6/1/e6130275a660e29b.jpg
e/8/f/e8faaa7830ec0d0f.jpg
c/5/7/c579fb6de42cd589.jpg
c/a/e/caeb675c8bcdeddc.jpg
2/4/a/24a4c90a423a4f43.jpg
5/b/8/5b83f17883e1b70f.jpg
4/4/c/44c49d3f5405516b.jpg
7/6/c/76c76944e21be251.jpg
b/2/8/b28b802513c561f1.jpg
6/0/2/602fa567a506a182.jpg
b/2/c/b2c224adb6ef51e3.jpg
4/5/a/45a63ae412aad48a.jpg
4/7/3/47390bf6e92afa1a.jpg
b/8/4/b840ad508f931cb4.jpg
4/5/a/45a69b655559b9eb.jpg
9/4/6/9467c0c6b13f115b.jpg
7/e/1/7e18528fd60e21b1.jpg
9/1/a/91a1d02dfc75e973.jpg
6/3/c/63c5e00ce3b392b7.jpg
f/3/a/f3af7ff26563d01d.jpg
6/2/3/62337f1e64d9ddd8.jpg
1/f/0/1f0bdfa12110331c.jpg
b/0/8/b08d787a4839011a.jpg
d/8/a/d8a9bd9a7a119eb2.jpg
f/d/2/fd23df1f19b10f8c.jpg
c/3/0/c30ae96a94078018.jpg
f/7/d/f7d0ddbd96724413.jpg
f/b/0/fb0963dcc86c38df.jpg
1/8/d/18dfbef85f3fd934.jpg
2/9/e/29e0d27e16f065fd.jpg
4/4/4/4442db5fd704ccc2.jpg
2/4/b/24ba537755154584.jpg
f/4/3/f439451b8ef1b690.jpg
2/b/c/2bc7e6e6a8fdd5a3.jpg
1/f/9/1f9797eb23a188ff.jpg
9/d/4/9d4da1c14c24bfa4.jpg
b/c/1/bc14f83eb98f00b8.jpg
6/d/0/6d06e845d5082e0a.jpg
6/c/a/6ca2bbe99685a585.jpg
3/b/4/3b42d09839e913a4.jpg
5/7/7/577fb585db886eec.jpg
9/e/c/9ec41fea278718d8.jpg
2/a/2/2a21eff5a414af6b.jpg
b/4/1/b41c0c5067473f46.jpg
2/a/8/2a8d0c033f7cf55e.jpg
7/f/3/7f39bf488884f60f.jpg
a/6/9/a6996fbc5bc18d98.jpg
c/7/a/c7a26e08b08d13cc.jpg
1/a/6/1a6d103b3728a3b2.jpg
6/e/5/6e59b5d1a46f8091.jpg
f/f/8/ff82d5c056cc9eae.jpg
2/c/e/2cede6e3a822e868.jpg
6/b/d/6bd8fb5ea44a0804.jpg
1/d/1/1d131307f1ddfeb3.jpg
1/5/0/15014b2e351cf1d2.jpg
2/7/c/27cf9327fe55ed78.jpg
5/3/0/530ea79045c4192c.jpg
c/1/8/c182ebee418d2bc9.jpg
8/c/9/8c9e56b8aa6e5b27.jpg
9/e/d/9ed7d3cee4ed6e2d.jpg
9/f/f/9ff8fa7869345a83.jpg
8/f/d/8fd3cb9af9a7a74b.jpg
1/8/6/1867c23777180b0c.jpg
6/e/7/6e771e96b904c399.jpg
f/3/a/f3adfdc7f8dd3f61.jpg
c/a/e/cae1e7290101ef15.jpg
5/5/7/5575a0657517765d.jpg
d/3/5/d35ee1b5494f5a6b.jpg
0/5/b/05b0c88c46161e54.jpg
b/6/d/b6dc73faa57b93e1.jpg
c/1/3/c1302acd35bd8ba5.jpg
9/b/b/9bba2b7e3a9d50aa.jpg
5/7/9/5791693e103c4959.jpg
5/3/3/5337956649a15480.jpg
1/5/8/158a68eca9bdc2bb.jpg
a/0/1/a010c664943ceb8c.jpg
1/6/b/16b33aceb87204a2.jpg
9/2/1/9210bbe57c93be03.jpg
7/1/4/714182d34025606a.jpg
6/c/4/6c4fc278d76499e9.jpg
7/e/d/7edb59b48c72ae74.jpg
3/e/d/3ed48458b92139db.jpg
b/9/e/b9e224ee387969b7.jpg
9/7/1/971caf061c538fd2.jpg
3/5/8/358b3dcb146778bd.jpg
9/2/c/92c906b88787c6dc.jpg
6/f/6/6f6176625a89febb.jpg
5/4/b/54bfe2e38b7bdb90.jpg
2/1/3/213e7673b7637cb2.jpg
f/0/5/f05f83facb06b2e8.jpg
7/c/1/7c1334e8ae67a1a6.jpg
1/5/9/159cbb08b0916dda.jpg
b/8/f/b8f8953d199ad8a4.jpg
b/b/2/bb2ca50bb051a42b.jpg
7/2/d/72dcbec42f484444.jpg
6/e/c/6ece95a79656241d.jpg
3/b/9/3b9bff0572f63e0d.jpg
7/2/4/724f07f4a92757bd.jpg
c/1/d/c1d1fdb17d35b6b8.jpg
e/3/9/e3968613996845d5.jpg
7/9/6/79645c82fada5c68.jpg
8/f/e/8fe09d0df360d9ff.jpg
f/7/4/f7447d70229f5a6d.jpg
d/4/e/d4ed215338fff8b1.jpg
7/b/a/7ba53f83423eabbf.jpg
4/b/b/4bb11d74c50c560d.jpg
c/5/2/c52d90995746dce6.jpg
1/d/4/1d4b3982363fd8cb.jpg
d/d/4/dd4d9d6cff32dccf.jpg
3/3/b/33bb6536dd3baaae.jpg
0/7/f/07f2deb2d60bd332.jpg
9/0/7/907a094f7b629cec.jpg
f/1/8/f1871aa0e46638c8.jpg
b/5/3/b53c2a50cdbbca85.jpg
3/6/b/36b02d626922bb0e.jpg
3/b/4/3b4ec1f8f217c9c1.jpg
0/b/3/0b30ffb931f0b013.jpg
e/c/9/ec9bf012d6159473.jpg
2/b/6/2b6c0d57a6009a09.jpg
d/8/e/d8e427fe517a9d09.jpg
b/0/9/b09d8e28cac3c49a.jpg
4/b/0/4b0ba708615f9c94.jpg
f/f/f/fff352dd1b71f144.jpg
2/c/5/2c5fb4f32e716ee0.jpg
5/f/9/5f9505296cee00fd.jpg
a/1/c/a1cd5193ebae1fb4.jpg
1/e/2/1e2aab73ce959ec3.jpg
8/5/c/85cc1a401e8d3ba4.jpg
d/a/3/da3099b58e9de025.jpg
2/e/6/2e618868bc619bc6.jpg
8/9/8/898910bbfe1c3acb.jpg
f/8/f/f8ff1a900f4bc46e.jpg
7/7/d/77d936fbc84a623f.jpg
3/b/5/3b57ad4fb485f414.jpg
5/c/1/5c1f46360f1a4384.jpg
3/7/1/371406e1aaf3afe9.jpg
f/9/2/f9236d99a8d3a7cc.jpg
c/c/9/cc967f5246f44398.jpg
b/6/8/b68e9f7f56b48dd7.jpg
b/9/2/b929c547138b3825.jpg
f/a/7/fa7d92874145a09b.jpg
f/2/e/f2ebc96bf9d4ad7b.jpg
a/7/f/a7fb3653972a0ef5.jpg
3/2/b/32b3ce625026a395.jpg
b/c/a/bca665412612e559.jpg
d/0/6/d06820b5fffd2780.jpg
0/3/e/03eef4723b057ef1.jpg
3/2/c/32c7dbaf1337dbd8.jpg
f/d/5/fd55aeea51f13769.jpg
7/2/2/72207d65071ee0e4.jpg
d/8/a/d8a0b538b806b238.jpg
0/0/d/00d80eea16970162.jpg
7/4/8/7482ad8d4d983b8c.jpg
4/b/3/4b3dd6d6cff89299.jpg
d/e/d/dedc90ea4b379f9b.jpg
0/d/8/0d80c613bcdb4137.jpg
1/b/4/1b441984c6fb0965.jpg
e/a/2/ea2cae91c812e9e2.jpg
8/7/b/87b0bb1ee2eca926.jpg
d/b/b/dbb29069f2b4ff76.jpg
7/5/0/750cd140e0b70b82.jpg
9/e/8/9e8d64b118fe850c.jpg
e/a/a/eaaab4a1e4bd7dc9.jpg
e/e/9/ee91f857f17b37ae.jpg
1/b/a/1ba004a6ffdce9f2.jpg
d/c/b/dcb40b532f5ca8c3.jpg
d/7/5/d7554e1a4b0ceef0.jpg
d/4/8/d48d8ab36ef45ae9.jpg
1/d/b/1db24b12d8c9582a.jpg
3/8/2/3821ebc9ed61cffd.jpg
2/c/0/2c03740fa8b1cad2.jpg
8/f/7/8f7b4a614f03be30.jpg
6/d/f/6df020d4c9e61884.jpg
2/0/9/20977a281730bd54.jpg
e/7/0/e70a6368b0f6e7e7.jpg
2/4/b/24becdbb27c469b4.jpg
e/4/c/e4cf85f4c6e529e3.jpg
4/0/0/4006b0ca7eab37c4.jpg
9/3/e/93ea047c8bb8f3d1.jpg
c/d/4/cd40950fe559f605.jpg
3/a/6/3a6f94525e883ae4.jpg
c/9/3/c93094fd6c10c09c.jpg
a/e/6/ae686806aaa6aa3a.jpg
0/b/8/0b8890267c258b5b.jpg
f/6/b/f6bb03f8198806b1.jpg
9/c/a/9ca508a3a1ae62dd.jpg
5/d/4/5d4b6bc4a3481f87.jpg
9/9/1/9910f50a5688c0e3.jpg
4/7/b/47b5607b1d2d34c7.jpg
6/a/7/6a797727c1c9f086.jpg
f/1/d/f1d2cd78ce638363.jpg
3/6/a/36a090292fe047af.jpg
2/9/c/29c0997f4ede49b7.jpg
a/d/c/adc5904acc70b952.jpg
6/a/7/6a7e85545b75c56d.jpg
4/a/f/4afb5e471958b811.jpg
e/8/f/e8f18463596efe39.jpg
6/7/2/672bca3ab532f41f.jpg
1/2/7/127822490ec20fcc.jpg
1/c/c/1cccb75ccf67098b.jpg
a/f/a/afa05f9b6dca24cf.jpg
9/9/0/99080dbef666505f.jpg
9/d/4/9d4fa0b359dab9f9.jpg
c/f/a/cfa6f38ed4e0b2c7.jpg
a/4/8/a488ecc99d2da905.jpg
4/6/b/46be0a83c680d939.jpg
7/3/f/73ffba3cc30387bc.jpg
9/6/2/962a45a3d49deaf0.jpg
b/8/b/b8ba34feedaf24d0.jpg
d/0/8/d0860d74ded0976e.jpg
a/f/1/af198f198c80be6d.jpg
9/8/c/98c2cec6f961315a.jpg
e/a/1/ea1a95e5922d8414.jpg
d/d/8/dd8a9a87ede81cef.jpg
3/a/8/3a8018cdfab51ad9.jpg
c/f/5/cf50b54548314714.jpg
9/e/a/9eab569cf41e69c5.jpg
3/c/f/3cfe2d232fbaea02.jpg
b/7/b/b7bbf0791db3d654.jpg
5/7/9/57987681d8712bb6.jpg
9/a/d/9adc6bdab119aef3.jpg
b/1/9/b197c69c0abb6897.jpg
0/1/a/01aa3571a914f9e7.jpg
6/5/c/65c15cc684b15829.jpg
b/7/f/b7fa9b260a126d4b.jpg
d/4/3/d435b5de9110e653.jpg
2/6/8/268b22219205e36c.jpg
4/6/3/463cf20298baa72d.jpg
0/a/c/0ac0161da73e997c.jpg
1/1/c/11cab029054255b1.jpg
d/e/e/deef1d705a94cfa9.jpg
7/7/0/7706482502922adc.jpg
b/1/4/b140b87fb7a77401.jpg
f/8/1/f81418f6f5483072.jpg
d/0/3/d03ca878c91ad166.jpg
f/c/e/fce6b1bfa3083471.jpg
0/d/5/0d581e3d6e6ee71c.jpg
5/b/c/5bc7812d17d4b25c.jpg
6/a/2/6a24ba71303e56a0.jpg
9/d/5/9d5bf1af422b9cf4.jpg
a/5/4/a5459ea72d513d8c.jpg
1/1/8/118f2c1f4bfba51e.jpg
7/0/b/70bb6dbe29caebba.jpg
7/a/a/7aae6bc65ca1e3c9.jpg
9/1/a/91a017b51efe5416.jpg
2/d/4/2d42dea7ab3dbd21.jpg
0/b/7/0b7398a9600e86fb.jpg
6/9/1/691a4b2225c79727.jpg
2/4/0/24000010e596b590.jpg
f/2/2/f22e109584f075a5.jpg
4/d/f/4dfcbede5417a15f.jpg
1/2/8/1281e7451732039f.jpg
d/2/6/d26fd272d587480a.jpg
9/1/e/91e4e03a947013b3.jpg
9/c/1/9c1b84a2e404ea0d.jpg
d/b/4/db47ed7d9588688c.jpg
3/5/4/354042d302901c46.jpg
8/0/c/80c2065abf1e6bb8.jpg
f/a/e/faec20fec6f80673.jpg
1/f/6/1f6fe4aed81c7290.jpg
1/8/3/183f7e526f2d8e9f.jpg
e/a/6/ea60e10f5ed955ae.jpg
4/9/1/4915cb265aad5faa.jpg
d/8/c/d8cae533cef3ceea.jpg
8/7/c/87c14c87cfcebaf8.jpg
8/8/4/8846b7fc4a07abdb.jpg
f/9/8/f98871a059e8e173.jpg
e/3/b/e3bc064d7fcd39e4.jpg
d/0/8/d0889a85bb650653.jpg
9/6/3/9634f7d7390749e0.jpg
b/8/8/b886fe6b50118cee.jpg
f/4/8/f48bbc4068091bb6.jpg
9/1/2/91224eedc5af138c.jpg
0/d/4/0d4adc2019c1c4d8.jpg
7/b/9/7b97f32d7c433f17.jpg
a/e/f/aefa55f2193a353b.jpg
5/1/d/51db11c127dfcc2b.jpg
4/3/3/433c1bae60a55c5c.jpg
9/8/3/9834c76c77a202cc.jpg
b/0/8/b0882ff69f4a6a79.jpg
5/4/a/54a97e0cfa581050.jpg
8/4/8/848a2576a409f992.jpg
4/7/9/47976e3895210f39.jpg
0/0/5/005dfa79c910941d.jpg
d/f/9/df9974df2277bb5c.jpg
0/9/b/09b47d2b16014cf1.jpg
3/c/c/3ccd2a987d1965d5.jpg
6/d/a/6da1bac1f0e3064b.jpg
8/8/c/88c8638e6fc89be6.jpg
d/6/8/d6802932e8240b64.jpg
f/6/7/f6721a6feac847a5.jpg
5/0/7/5072c4526dbddf48.jpg
5/5/4/554c1840ebb1037e.jpg
c/0/7/c07889fccd8d9695.jpg
2/4/a/24a767e637e9b3fb.jpg
c/9/e/c9e7e432becc870e.jpg
3/a/3/3a3f22d3d2c4e5c9.jpg
3/6/0/360899fde90d6ccd.jpg
8/9/d/89db95f81b2b0db4.jpg
d/3/8/d38fa7d12f1eef72.jpg
f/f/0/ff0e114f8b54dd5a.jpg
5/5/f/55f637c107d6e577.jpg
e/4/8/e48c6bc806948faa.jpg
f/f/5/ff59747ba9544e6a.jpg
4/6/7/467f0b4910e7c908.jpg
3/c/4/3c4f494f4bc083fe.jpg
8/0/3/8031ad2b37aaa50a.jpg
0/d/3/0d3e241ed8dd6f4b.jpg
c/9/3/c93571496a48cecc.jpg
6/e/2/6e2dac931a25f252.jpg
e/d/b/edb57386463d29f9.jpg
5/2/f/52f25b78175a27e0.jpg
b/3/8/b38a2b28b046610a.jpg
a/5/b/a5ba23646b918d9d.jpg
2/c/c/2cc4f67edb2a87c2.jpg
3/5/a/35adadfa95ca8b9b.jpg
f/0/2/f02fd662c0f8ec28.jpg
e/b/c/ebc439c4c0b272f3.jpg
1/6/1/161d2c742b434aac.jpg
e/9/5/e9572120076fd5ce.jpg
b/7/6/b769e37ff4201c07.jpg
9/e/2/9e2ec9ea91490676.jpg
c/b/5/cb5df32862a121c7.jpg
6/a/4/6a4c19947472bfeb.jpg
e/5/f/e5f8ef32080ea78c.jpg
7/a/7/7a7503f53fa32cb8.jpg
9/7/a/97a6fc15b711b72b.jpg
d/c/8/dc89a133331ebe7a.jpg
3/e/c/3ec9e808beea02e3.jpg
6/b/f/6bf614748c5affc5.jpg
a/4/a/a4ad881ed57ae35d.jpg
0/a/b/0aba17db1a278989.jpg
8/e/d/8edf49db9d7d5f7b.jpg
f/3/f/f3fd8c88ad94762a.jpg
5/4/6/5469c0d2c2a664cd.jpg
a/7/0/a70143c029b35dbb.jpg
2/c/a/2ca5a5e2b3817578.jpg
b/a/5/ba5362270267c51f.jpg
b/f/c/bfcf73488eb98e65.jpg
5/a/4/5a417bed6d062df6.jpg
b/5/0/b50b193d524a7391.jpg
a/6/3/a634110437fd1014.jpg
0/a/9/0a96a688d52e4fd8.jpg
d/9/e/d9ed094ce7d7a473.jpg
e/5/7/e57031dbd24989c6.jpg
0/b/5/0b51757bfe5a0332.jpg
3/0/4/3047068db140e606.jpg
e/7/f/e7f6dc0fdcffa19e.jpg
a/3/3/a339470b9491103f.jpg
4/f/4/4f481a47af0abd01.jpg
d/6/7/d674dfb5423f7964.jpg
c/1/9/c191cdc069e45907.jpg
6/4/b/64b9bb6cdf3862ae.jpg
e/4/4/e44c29838a65f8d1.jpg
3/9/4/394cf13b2efd562c.jpg
4/f/e/4fed9f7d6e3f4cc0.jpg
6/0/d/60d23ca0b965a545.jpg
b/d/f/bdf1520f082785ca.jpg
9/a/d/9ad7511ffdf71950.jpg
6/c/0/6c082d56a8c201d2.jpg
d/a/f/daf8c10ff9ae68bc.jpg
1/5/d/15dee4923c28f7a5.jpg
e/5/0/e5018424b1264e5d.jpg
d/6/f/d6f4e2af58d26a0b.jpg
5/1/6/516fb3f2254d7524.jpg
7/4/9/7495ac7ccd5bf5d4.jpg
5/0/e/50e2093d53ac4449.jpg
7/9/9/799b78a2cb2f1e10.jpg
f/7/5/f7548b0df1e2e27e.jpg
7/6/0/7601711640cecdb3.jpg
a/a/8/aa8647bb13596460.jpg
1/e/b/1ebd02e26a5e3acd.jpg
f/b/d/fbdaa400c262f371.jpg
9/b/e/9be6e54afa286db3.jpg
6/a/0/6a0718d7d3c60800.jpg
8/6/0/860eafd206b75e95.jpg
d/9/5/d95913fa387839bb.jpg
0/f/f/0ffceed7f568ed01.jpg
9/e/b/9ebeec1f76ed5ca1.jpg
1/5/8/1588e654c11cb134.jpg
a/3/f/a3f52138440565b1.jpg
a/e/c/aec9b0b9f1a70491.jpg
b/a/3/ba378a182094694b.jpg
f/f/d/ffdd23df737b2937.jpg
6/c/a/6ca23357698fd46e.jpg
4/1/f/41fb889ec058d8ee.jpg
8/b/0/8b0301da630c0606.jpg
2/1/1/211a3e494e21ef30.jpg
d/a/5/da581b84c837dcb6.jpg
c/0/5/c05b26eeb938527d.jpg
e/e/a/eea1becb0f02c0d2.jpg
2/7/7/27753d7b3377e909.jpg
8/1/0/810e88ec6e1279d7.jpg
6/7/e/67e8d67fe48f9729.jpg
7/1/5/715bc773a828504b.jpg
0/9/3/093c5d8b4f222d6b.jpg
3/2/d/32dba6b551f36b25.jpg
9/b/f/9bfede52cd1aaf12.jpg
f/7/1/f71929a2e5c14352.jpg
a/7/6/a76bd0a4d91de9a0.jpg
7/0/2/7022573f818ccb51.jpg
1/5/9/1594b784ef58ee40.jpg
d/c/4/dc478e7afd827833.jpg
6/f/3/6f344cc0c629614f.jpg
a/8/7/a8732affcbf954d1.jpg
b/f/e/bfe152c5376a8695.jpg
e/5/c/e5c387003ee121b4.jpg
9/3/f/93f3ebfba7709006.jpg
a/3/6/a36d31db49b3c838.jpg
3/b/7/3b710a7c17996d71.jpg
a/0/1/a01e4dddf2ac7e52.jpg
f/b/8/fb85a263649d9662.jpg
7/9/b/79bc6d80be73bc03.jpg
b/6/1/b615a0dd5d8f88e9.jpg
5/5/e/55e0dfae8558ab96.jpg
a/e/0/ae076d32bfacaeb8.jpg
f/f/b/ffbaf47d182bbff3.jpg
e/7/b/e7b5a1bcc830862a.jpg
0/a/8/0a88d8c2e41fa794.jpg
f/d/9/fd91b50f68873c7b.jpg
2/e/d/2edfa5e991b4e3a9.jpg
8/d/2/8d2112b421813afa.jpg
b/4/0/b40672d139cc717e.jpg
4/a/4/4a4253967ae01b0e.jpg
e/4/b/e4b5985faf592b60.jpg
b/6/8/b689ea461f9d00f2.jpg
9/b/2/9b21ad27dba86103.jpg
7/5/4/754408ecaff261ab.jpg
0/1/1/011061353b6122e7.jpg
f/5/e/f5efdf5c293107a9.jpg
4/4/5/44538e9c4fcc12c4.jpg
a/8/5/a853ccb059eef446.jpg
d/0/2/d027e0b885a6f2b7.jpg
3/6/f/36fe32a00c9d215b.jpg
3/d/8/3d8c429301c2c46e.jpg
2/6/c/26c4e1cc6d493a59.jpg
4/0/c/40cf8a5f31d2b9ec.jpg
f/6/6/f663dabefe279555.jpg
2/6/8/26852035df04bbd8.jpg
9/1/0/9106e3d08baf36b0.jpg
3/9/0/390359d49dd21292.jpg
4/a/c/4ac31fd4b25f595a.jpg
4/b/d/4bd2ba11146963e6.jpg
8/f/5/8f5f53d546adcbbc.jpg
d/8/6/d8614be2d3583bdb.jpg
9/3/3/93397d070689bd48.jpg
2/d/d/2dd51871ad2797ac.jpg
3/5/f/35f84119f079801e.jpg
6/a/5/6a589cef07a5ba31.jpg
4/e/3/4e3ed1805d0f8ee7.jpg
b/9/8/b981bb5f843aac06.jpg
d/4/5/d45f6d499b883997.jpg
4/c/9/4c99c3f8eaa6c935.jpg
2/6/3/2637b1f77b3c4fb1.jpg
6/4/d/64d4b537a1c781a5.jpg
c/a/7/ca7d192755c0a5d8.jpg
e/3/1/e310bdc941948bc3.jpg
1/4/2/142a1d1e120f4726.jpg
d/f/0/df0d38c29a906c1e.jpg
2/6/8/268ba33ef255113b.jpg
d/6/b/d6b569b00053e933.jpg
d/4/a/d4ab82db02c5bc2e.jpg
7/4/5/745bfa96404e21cc.jpg
5/2/b/52b072872bad71b5.jpg
9/f/5/9f5a159e69316aca.jpg
4/a/6/4a69ac1896916983.jpg
9/8/e/98e864abf48ee7ce.jpg
9/a/7/9a79f711ed15ab9a.jpg
1/4/e/14e000761bccdece.jpg
6/5/1/651af8f4ff1f8cac.jpg
5/b/d/5bdbad9dca49c7da.jpg
4/6/0/460787ed8fd62846.jpg
e/b/e/ebe27eb87db48b97.jpg
a/2/f/a2f17d8ac5eaa084.jpg
5/2/6/5265c367c59e7012.jpg
6/5/1/6512afc5fc54e50e.jpg
6/3/6/6361205536e4d083.jpg
b/5/4/b546ad7f82c766e8.jpg
e/9/3/e937e03de08b37fc.jpg
7/c/3/7c32e337f6a30c32.jpg
5/9/f/59f2c3845f135de8.jpg
2/5/7/2574296d6dc3e478.jpg
5/2/6/52679de90affb718.jpg
e/a/6/ea6cc19a210f2a02.jpg
1/8/3/1837b303fec7bd59.jpg
8/8/0/8800cbd3a66944f6.jpg
3/8/e/38e9045e8811ceb4.jpg
c/1/f/c1f90f68c558734a.jpg
e/b/8/eb81240456fc86b5.jpg
d/e/8/de87c4d54cf51231.jpg
c/4/5/c45ca9b95076ed98.jpg
e/a/2/ea2d5f9b9c37613c.jpg
8/5/f/85fd855b0deac8f3.jpg
c/3/2/c32b7139d7ef5012.jpg
0/1/c/01ce279db8e8e1df.jpg
3/e/2/3e218b72a870e5a3.jpg
3/b/1/3b191bd194400484.jpg
2/8/d/28d245e3397752ae.jpg
7/a/0/7a04b3fa0d00a4c3.jpg
e/2/9/e2999f0a7b4fae4d.jpg
3/2/9/329277468a873be5.jpg
1/8/1/181d105f870c6381.jpg
e/4/6/e469e73f9702b108.jpg
b/1/b/b1bbc552045fe3a7.jpg
5/0/d/50d2033c165a39c8.jpg
2/f/f/2ff2f4a55c9b22ae.jpg
a/8/1/a81ff7a45749cf5e.jpg
a/1/3/a130cf7f68aa4a80.jpg
8/1/2/81279e4fcf00f153.jpg
0/9/e/09e62bbbc62b217c.jpg
2/c/2/2c29aeba62337277.jpg
2/0/7/207fe01f05159d8f.jpg
1/a/0/1a0f0848c3fc5dc3.jpg
c/3/3/c330aa7a38be8539.jpg
7/1/7/717a013f89cf5494.jpg
2/9/9/299c9e323eb0cfe9.jpg
c/e/4/ce4ffb5e0fff49e9.jpg
8/1/6/816077e98d9b3ab7.jpg
9/b/3/9b3ae997d29b33c3.jpg
d/b/d/dbde5f81947eb1fc.jpg
e/a/1/ea1fe2e5f83dd98a.jpg
8/9/0/8909c167907bad6d.jpg
c/a/0/ca0c8090885283a4.jpg
9/8/5/985992ba0d195fe2.jpg
c/9/f/c9f5924f544d6641.jpg
5/8/c/58cbaa9d5d43bd5d.jpg
e/d/1/ed1c20ae81bd07a4.jpg
c/a/0/ca0832d14f22ce0d.jpg
b/9/0/b9022f3f5cbbaab3.jpg
3/2/3/323357b88a5921ed.jpg
b/c/3/bc38fa8d5cc71673.jpg
7/5/f/75f6e88b5b072a71.jpg
4/3/5/435d13354111d73c.jpg
7/2/3/7237e40b3a72c58f.jpg
9/b/2/9b2a7f11931d0da0.jpg
e/5/7/e57197509ccc4509.jpg
6/f/4/6f42260bb7223215.jpg
d/6/b/d6bd66d0299943ff.jpg
0/a/5/0a5a1ccaaa3051cc.jpg
9/2/6/926e020bb002c4fd.jpg
5/f/3/5f355c24142e9ecb.jpg
7/7/4/77435d7c993771b3.jpg
f/2/e/f2e582d2efc29a87.jpg
2/6/e/26ef71f9795c399f.jpg
b/1/e/b1ee150cc4dd0231.jpg
5/f/0/5f08e15b3c689f7d.jpg
4/b/1/4b18b2f68946cddb.jpg
7/f/1/7f17af442c08dd33.jpg
8/e/e/8ee91e6db5f25ad2.jpg
8/3/7/837ecf9431b63493.jpg
c/4/0/c40075641d604f76.jpg
4/3/f/43ff085246de3f5b.jpg
0/e/2/0e25eb270cbc2268.jpg
e/e/3/ee33405a4c76ee85.jpg
4/d/1/4d14db7ea6f1f3c0.jpg
3/1/c/31cb3799f407dc0a.jpg
c/c/7/cc7fd2cb852c71f0.jpg
8/a/8/8a81e10286e029e5.jpg
2/0/2/2025e2bf2e1894f5.jpg
2/0/5/205a38fbbdbb1803.jpg
3/f/9/3f9f3afc4f9427fa.jpg
a/0/8/a089bcc61c6a0f81.jpg
e/a/f/eaf54b1e36aec567.jpg
4/6/f/46f930c91523c812.jpg
e/5/b/e5bd4ab2a599d041.jpg
9/f/0/9f020815cfd91fdd.jpg
a/e/6/ae603958a0054f68.jpg
7/d/9/7d98b47f436e9d86.jpg
8/d/c/8dc67f6eed6543bf.jpg
d/2/3/d238b2c00117780b.jpg
6/0/3/603e52f52bfe9e48.jpg
d/c/5/dc5373f4d733b945.jpg
4/7/c/47cf010482ea0c25.jpg
2/0/d/20dd0cb7287df350.jpg
c/a/2/ca2f2762c9383c34.jpg
8/b/e/8beddb5d1485bfde.jpg
e/c/f/ecfae03646ae6109.jpg
4/5/e/45efdf6326304338.jpg
5/d/b/5db5025d5c814a4d.jpg
a/f/1/af1bf4a642667d5b.jpg
a/3/3/a335adc309a1b640.jpg
3/5/3/35323b009d743683.jpg
5/4/b/54b22dd32c9a46bc.jpg
0/9/6/0967c446b7636808.jpg
2/7/b/27bb3da494f23696.jpg
2/3/7/2373f1b43e98979b.jpg
d/7/d/d7d22cc13fd68910.jpg
c/f/7/cf703e8043324c6c.jpg
2/8/9/2891cdc81cdf0676.jpg
9/8/7/987a3ef586962113.jpg
2/b/2/2b29425981563113.jpg
d/e/6/de6bdfde11798837.jpg
0/b/4/0b42c8e948fe7ddf.jpg
a/d/b/adba8de52c6be267.jpg
c/0/e/c0e78664c8e84b25.jpg
e/b/9/eb946798063739c4.jpg
9/5/2/952329d772ea7e07.jpg
0/7/f/07f5c38c5680b4a7.jpg
c/5/a/c5a57ba34ae9d918.jpg
5/3/a/53a154b43a9c1711.jpg
a/3/9/a39d51cfb6e046cd.jpg
1/d/9/1d97419de5ca01a6.jpg
9/a/3/9a32b62c18f60891.jpg
5/1/f/51fa78aa1c8dda17.jpg
1/f/4/1f46534d13419f79.jpg
9/3/7/937d7cf77ded6f0f.jpg
0/b/1/0b1e1e2b941cb025.jpg
b/4/c/b4c38788658d4272.jpg
5/e/e/5eec4f90c1c64fc8.jpg
1/1/5/1156819bed70aecb.jpg
c/c/f/ccf1eed5aea82aa7.jpg
d/1/6/d167d53151730612.jpg
0/8/3/0838c2decf9b0ecd.jpg
d/d/1/dd16ab74d08cd9c7.jpg
f/d/3/fd3b8ab95f074b4a.jpg
4/4/b/44bc2ef44d208647.jpg
1/e/6/1e6baaba6634162b.jpg
6/f/9/6f9ad5133ec0a778.jpg
a/c/6/ac6ad82e14bd3812.jpg
f/5/c/f5c665e8cabc3632.jpg
7/1/1/7114f379ee82ca0b.jpg
c/6/7/c676a1ed64f9fc77.jpg
7/0/e/70ec6cd5a31ad7a8.jpg
2/4/0/2408d0e88a870b6b.jpg
9/3/c/93c821271935d3ec.jpg
0/7/9/0799d5c656bbded6.jpg
f/3/4/f346cad59d401697.jpg
1/6/e/16e5714db610f7e4.jpg
0/5/4/054facdca1a5f76e.jpg
9/d/9/9d9eac08c85f8d13.jpg
2/c/2/2c268b9cc6654dec.jpg
4/7/6/476e78f47432a79a.jpg
2/d/e/2de9554e5d855612.jpg
d/b/7/db7fed8bef295dce.jpg
2/b/f/2bfc99a5a1d6fba9.jpg
e/5/1/e51cedb672c733ee.jpg
5/d/d/5ddb9118f7f69495.jpg
e/2/e/e2e2a54716abefac.jpg
0/a/c/0ac1b7d36c2f905f.jpg
5/6/6/5663fb9694516af8.jpg
4/f/e/4fed21f398a0f2fc.jpg
b/e/c/bec5aba5ff5b889f.jpg
8/4/a/84afa41bd9eef71c.jpg
f/7/d/f7d4eea690f8244e.jpg
b/a/5/ba5c09ffd42c49b2.jpg
9/9/b/99b5feb2a7c259e9.jpg
2/0/1/201bd991098a1bcf.jpg
c/c/a/ccafc6c01e014698.jpg
9/6/8/9688e8c243f3edd4.jpg
a/0/f/a0fde55ab0960dcb.jpg
3/5/1/351f5076630c55f5.jpg
4/5/8/45869f1c6d373382.jpg
3/6/9/3692848f09e54407.jpg
3/9/6/396874704bd90515.jpg
8/c/e/8ce4b7ea2afb43f3.jpg
6/0/9/609df3b6fc5fb106.jpg
a/1/4/a14bec1ed8f1b8b0.jpg
d/c/2/dc23ebe6c8b7a377.jpg
d/d/b/ddb1fe162ba38a0b.jpg
c/5/c/c5c7337206aa9efd.jpg
2/2/7/227e42b9b4146bc1.jpg
6/a/9/6a98bc17a1451cd9.jpg
e/9/7/e97d72274d9cbce5.jpg
3/3/3/3333d3a0f48aed43.jpg
2/e/8/2e8d9bd5aa84273b.jpg
d/a/a/daa3d3ba9b6acb9f.jpg
a/9/a/a9a09542ffc38052.jpg
b/b/5/bb5d8804d05c5f2d.jpg
a/3/1/a312f02f28a48598.jpg
7/5/5/75570dd48afc775d.jpg
c/6/e/c6e7f7fde518cf46.jpg
3/2/8/32857384bbc91775.jpg
c/3/5/c351139233ab12c5.jpg
d/5/3/d53abfdf29a3848e.jpg
2/1/f/21f7a57494d3156b.jpg
2/1/9/21990ed695a22944.jpg
7/8/5/78537f95dd9fa0d4.jpg
f/4/d/f4dc80c78a548c35.jpg
3/0/9/30954fe043f92ef1.jpg
0/c/8/0c8c3a087a308c1c.jpg
f/2/5/f251d0209e95298b.jpg
9/7/8/9781a2b0341c5ca4.jpg
2/2/2/222827cc42052636.jpg
c/7/c/c7c4c43beb99893d.jpg
7/4/1/741b6bfb18d976db.jpg
a/7/e/a7e768947e08a728.jpg
5/1/b/51b4c9a5ee9bd567.jpg
0/1/8/018271b28ce4b6d7.jpg
5/f/6/5f6ca18cbf0119ae.jpg
f/7/8/f78a40547bf0c319.jpg
2/0/7/2075141422dfcdf0.jpg
3/a/a/3aa0d2176edebe9d.jpg
8/d/b/8db7a3a51c857f66.jpg
9/a/9/9a9a98e3665ed346.jpg
a/5/c/a5cce7aa6cb5f157.jpg
f/8/5/f855a5f574486afd.jpg
6/3/c/63cf0ad88073e0d4.jpg
d/3/2/d32b7be83543b289.jpg
7/1/f/71fbee04df074f44.jpg
8/7/9/879fe6dcb35e45e2.jpg
6/7/6/67640a008b75efc2.jpg
b/e/4/be4c89095a57795d.jpg
8/b/7/8b7f5434662c6e82.jpg
a/7/3/a738c8c1a4b402d8.jpg
b/b/9/bb9c3a472ddc78f5.jpg
9/e/8/9e8186a9ca9d0955.jpg
1/d/7/1d70a2a352784182.jpg
c/9/d/c9d3709c85322f5f.jpg
8/b/0/8b05447a6fadb50e.jpg
8/0/7/807a6329e7ca0b63.jpg
5/d/9/5d9c2bbfd20ff8ef.jpg
1/a/0/1a0d81c68533ffc9.jpg
3/7/6/376ea5a6d46ba0c9.jpg
b/f/5/bf590863a9c2cb6b.jpg
8/a/7/8a79bbf252d3398b.jpg
4/7/3/473b9e0fd8135537.jpg
f/a/d/fad0de9a031db0d6.jpg
b/6/f/b6f0cfdb7dafaed9.jpg
8/6/5/865352e5279f7f44.jpg
1/0/4/10454fcadbf98fd3.jpg
8/7/a/87a21b20036dc91e.jpg
1/2/0/12023060431549e4.jpg
a/b/8/ab88714f96965102.jpg
3/1/9/319acfd995acb203.jpg
4/b/1/4b105bda53623be7.jpg
f/2/0/f20dffe7e70ff888.jpg
8/3/c/83c810d7b8325b08.jpg
e/6/f/e6f6d36ca7004c6d.jpg
9/5/8/958e71a9577c3dca.jpg
6/d/4/6d43e49e8b2cdafa.jpg
4/e/e/4eed86b9815712b6.jpg
2/f/5/2f56ec3968320166.jpg
4/f/2/4f23e30bd3c054d1.jpg
5/6/c/56cbc353a9b2772b.jpg
e/f/d/efd34a79a2150328.jpg
e/1/8/e18e783a640680fa.jpg
2/d/5/2d5db15b19396eb7.jpg
b/1/9/b193a64692d77b75.jpg
a/7/4/a745cb63af8594c6.jpg
f/0/a/f0a20e327764ac88.jpg
3/4/3/343d4f4a545c4d2c.jpg
1/0/2/1028b5654e19460f.jpg
a/a/d/aadcca5f695cb390.jpg
0/9/b/09b78acd7099833e.jpg
3/0/2/3026bc7d27f4ed59.jpg
0/e/2/0e2ebaaf8eac98f2.jpg
3/9/1/391eb257be200520.jpg
8/b/a/8ba8fbbe1679e58a.jpg
5/d/d/5ddecf752af8a6fd.jpg
a/5/9/a595628502f3441f.jpg
7/b/f/7bf42ff9373e7834.jpg
f/d/b/fdba950fc53da9ef.jpg
f/8/4/f847257314621bf2.jpg
1/9/4/194a78ba4c441bab.jpg
5/1/0/5102ac0973f61b6e.jpg
7/9/2/7928c36f900c882a.jpg
3/d/4/3d42dd427728039e.jpg
7/f/7/7f732c0a9c6df093.jpg
2/1/9/219566d34d5c147f.jpg
0/d/9/0d9fe98b28c8981c.jpg
2/6/4/264692e8e2d6796e.jpg
b/f/5/bf577aa387a14813.jpg
7/8/4/784f94d39d90e4eb.jpg
f/4/2/f42d02b04884cdf7.jpg
1/9/7/1977e85fe8b73602.jpg
2/d/7/2d746a3b62e07c61.jpg
f/9/d/f9d6e345c32d7772.jpg
a/f/2/af219bc6cb2effa8.jpg
0/7/d/07dc13b1fbaf43ab.jpg
7/a/a/7aa8928202aeb3e2.jpg
4/a/4/4a4bcc3119bda596.jpg
b/d/e/bde4e6ca66de15a0.jpg
c/7/e/c7ea879272d03f34.jpg
7/4/b/74ba5c028bddf680.jpg
b/1/5/b15835de39d2076b.jpg
1/5/f/15fb593b58bf6611.jpg
b/4/8/b4856451e7456222.jpg
d/d/9/dd9119dab4e4054a.jpg
4/5/c/45cf271b20e4fd7c.jpg
9/3/8/9389bf0c079535de.jpg
7/f/2/7f299788361ca88c.jpg
3/4/3/34346a0dbe2be9d3.jpg
e/8/c/e8c3cf9ca08924d5.jpg
b/b/8/bb8d6e1a19cf2a77.jpg
9/c/4/9c41aaa3cd72de19.jpg
7/3/8/7380cb53c9f83ff2.jpg
0/2/8/02892b5ddce60438.jpg
0/2/a/02a86506902ae165.jpg
2/c/f/2cfb2145747a2be1.jpg
4/5/f/45fc9e86ddd66d44.jpg
7/b/f/7bfee145e70e3e51.jpg
8/6/1/86174c9bbda49595.jpg
9/3/5/935d50bdc990c6e4.jpg
3/9/7/397d680b5513816f.jpg
0/e/b/0eb6de7cf5a41351.jpg
3/f/9/3f98a497dd560018.jpg
e/6/7/e670b6ea377d893d.jpg
1/9/2/192e59cb81ecd2f3.jpg
b/e/1/be1b5afe97419a81.jpg
0/e/2/0e2f144225bce82a.jpg
5/c/1/5c1e8983005ebbf5.jpg
7/e/f/7efae1930721b8f2.jpg
7/5/b/75b32797eb53c718.jpg
c/b/f/cbf956d7b728f676.jpg
5/5/b/55bfdaa3a328ae76.jpg
6/b/6/6b63e66014184b4d.jpg
3/f/1/3f14e6cbde0be355.jpg
6/8/c/68c11b91f96ab56c.jpg
d/b/5/db5fe871f2d07bb2.jpg
3/5/b/35b7e0bd4c294022.jpg
e/5/c/e5cbe1a3b8667757.jpg
3/1/7/317c40f7fbe5a1cc.jpg
6/d/6/6d62bcbebeba8ac7.jpg
c/a/c/cac844973e8e0f9e.jpg
6/c/9/6c9c3c1fb0323e65.jpg
2/1/6/2161b20a4b006e4b.jpg
9/d/8/9d8a058f8ef0392c.jpg
7/d/c/7dc3d609d9d7b083.jpg
1/2/6/126f7b33dce19763.jpg
d/d/0/dd0717fd8c2e1966.jpg
f/1/4/f14b3799756d68fb.jpg
e/a/b/eab95e8f922084ff.jpg
e/4/e/e4e9e9dee476ce41.jpg
6/5/8/658019dc12503190.jpg
0/f/d/0fd665aca654340d.jpg
3/a/e/3ae2994712b6de03.jpg
2/c/4/2c4d240aa394020c.jpg
e/7/a/e7a62b7b50b76973.jpg
8/0/8/808c7ae890da8fc5.jpg
f/1/a/f1a481e55dd9495d.jpg
b/f/b/bfb27a99c25ccc18.jpg
6/e/d/6ed7bd08595afc8e.jpg
6/a/6/6a67dbd5f793eb3e.jpg
4/9/b/49b75d05dd2c4d7e.jpg
0/d/6/0d649cad3fbe3a43.jpg
7/a/a/7aa7f832bad03934.jpg
2/1/1/21127e95511d4da1.jpg
4/a/0/4a018067a80f1549.jpg
2/2/7/2275f00264ca0f10.jpg
6/1/d/61dc3bda4bdfc795.jpg
c/4/0/c405ba7f9506dab0.jpg
0/2/f/02fad3acc7b0b96f.jpg
2/f/d/2fd7c1a7c16874cd.jpg
b/e/1/be13b3d73015c96c.jpg
2/7/f/27f442a03ef0be69.jpg
2/6/b/26bdda1db3696e37.jpg
e/1/a/e1ae0ba6d95bd56b.jpg
5/7/4/57445d2bf46ddca3.jpg
4/e/4/4e49fbd22343b4ec.jpg
1/3/a/13a7a4c6eb227db0.jpg
c/9/e/c9e7565d39953744.jpg
3/6/8/368a88172ed4d96e.jpg
2/b/2/2b228b7ad39eb986.jpg
0/b/4/0b446ae249d1a868.jpg
1/b/b/1bb222bd00258e75.jpg
b/9/7/b978baf3047e5534.jpg
f/a/7/fa74787ff77ce175.jpg
4/2/9/429e72dbdabefb3d.jpg
2/4/8/248e9975756f9fa3.jpg
9/7/b/97b51eaf22e081b3.jpg
a/8/3/a83d8964816c75a0.jpg
3/1/2/312fc3daf4ae6fe9.jpg
c/7/2/c727d07f7b850693.jpg
c/1/b/c1beadfdf20807ba.jpg
5/f/9/5f92805ece98a27f.jpg
0/6/9/069a5cd16e003573.jpg
3/9/6/39623ca9884d846d.jpg
1/d/f/1dfb8c87a280d444.jpg
c/2/1/c212f1b983bd2d6c.jpg
d/1/6/d16509f8e134907f.jpg
d/6/2/d62597db05bd9786.jpg
2/8/7/287f60d13593fc81.jpg
f/2/c/f2c6017e0448783b.jpg
0/7/a/07a139605726d251.jpg
f/9/b/f9b2dbe9ea65c840.jpg
4/f/2/4f29a132c58aa330.jpg
2/4/e/24e661fbcdae6fe1.jpg
8/2/9/8297df6f77c136b1.jpg
d/8/d/d8deb976ebb27ea3.jpg
4/9/9/499e3d67c48be510.jpg
e/5/8/e58307c78b8bbca0.jpg
3/2/0/320fefd2de20ba9c.jpg
9/c/f/9cf94ea45b9d5e62.jpg
6/f/f/6ffdc5f1edf24ca1.jpg
7/7/6/7764b150154d8172.jpg
7/2/d/72dfe4ea0b7ddb10.jpg
a/6/f/a6fdf72de0d3857b.jpg
c/d/3/cd3267c4eca2e744.jpg
2/c/e/2ce0322de40a193e.jpg
3/4/f/34f2b9b744e5b8d9.jpg
0/0/6/006c415f2df638ce.jpg
e/0/a/e0ae9eb1bb8eb788.jpg
e/a/5/ea5aa57f907ebbf2.jpg
e/2/a/e2a8fa2ffa69098c.jpg
f/e/0/fe0fcacce1ad2e87.jpg
4/e/e/4ee4f81328fe909b.jpg
6/b/4/6b4de644fbd86f49.jpg
7/d/3/7d3fa28485f2823c.jpg
5/a/c/5ace3b3825e00e33.jpg
d/c/9/dc93f38a532ce2d3.jpg
f/4/9/f492f09be6986a23.jpg
b/0/a/b0a94097dc8908d8.jpg
2/9/9/2995a86314508370.jpg
1/1/e/11e990a12be82f57.jpg
4/7/8/4780bcb6646d51b6.jpg
0/1/1/011a00a4ccd42fc8.jpg
b/f/a/bfa5750e6ab9ca61.jpg
2/0/9/20930047b3c41c19.jpg
6/a/a/6aa809f1cd610471.jpg
9/2/a/92acafe7e60fa70b.jpg
d/e/e/deeffe47f58a447a.jpg
0/6/d/06d5ed4ddfb9bb21.jpg
4/9/c/49c7076a3dd6f86c.jpg
2/0/6/2069bed1afeca7e3.jpg
1/a/0/1a037c09be6b2b26.jpg
0/b/b/0bbcd816a40ee79d.jpg
b/c/3/bc38da293409cb79.jpg
5/b/e/5be8db6d008ca7ca.jpg
8/3/5/835cfa45a1ffb452.jpg
f/1/0/f10081c94f7d2aa6.jpg
4/6/0/460c347593f51e25.jpg
1/e/0/1e0f28308ec42fdb.jpg
e/8/a/e8aa4b5be9b248b4.jpg
1/3/f/13f128f3b53c3daf.jpg
1/4/c/14c774764e4d6aad.jpg
7/5/f/75fbcb49d3a5e1bd.jpg
8/d/c/8dc8b44dff740fee.jpg
a/8/8/a883d66b4d91091f.jpg
6/f/6/6f679c46895a0369.jpg
8/e/8/8e8faca1c9f20529.jpg
2/1/5/2157057dc09311be.jpg
0/b/0/0b0487ccbe9770a1.jpg
1/3/9/13927940c9f1a319.jpg
1/f/b/1fbe9bc2ea74522a.jpg
7/6/5/765295f9f5d624cb.jpg
6/3/2/63295741bb2a1237.jpg
7/6/5/765a4ffac1f2620b.jpg
d/c/1/dc1748bafd33bc15.jpg
5/1/3/51345b2589ae6179.jpg
1/1/4/11483262c1330e98.jpg
5/1/4/5143cb4c51707be6.jpg
d/6/c/d6ca45f95fad7bc0.jpg
d/9/c/d9ce9341372a782b.jpg
2/a/c/2ac6fefe458ce2bf.jpg
3/9/4/394c0904d1df62b6.jpg
3/8/8/38803a21cfcd675b.jpg
9/e/8/9e86491b2e0e238b.jpg
e/f/6/ef655e9dec6b0a82.jpg
6/2/4/624c3517255e0355.jpg
f/e/e/fee720613b72c112.jpg
7/b/6/7b6554b7f431bfd4.jpg
b/7/3/b734a193d5213ca5.jpg
8/0/c/80c746e4f07a6162.jpg
9/c/4/9c42590ebd9262d1.jpg
1/a/4/1a4c10ae11ba952a.jpg
6/6/d/66dbce4df9bbc57b.jpg
8/9/9/89924e4f280bafcb.jpg
7/9/a/79a1a7fca0b34479.jpg
a/7/e/a7e1664559450197.jpg
3/6/f/36ff83ae6626cca3.jpg
3/7/9/379d94e1ea03920e.jpg
d/d/5/dd5099aaeabc44d3.jpg
4/6/3/463c19923a555075.jpg
3/1/c/31c06df734f29b53.jpg
b/1/5/b157469636228aea.jpg
3/b/f/3bfcd1b8fc10986a.jpg
e/4/1/e415334ca0918670.jpg
4/5/b/45b05b6c7730537f.jpg
a/4/f/a4f1e1efccce3c66.jpg
1/7/3/1732e436a19e72ad.jpg
0/5/9/0592fdea97cf5cac.jpg
e/8/e/e8e91cc3a9f94009.jpg
2/d/a/2da51aa301cdf204.jpg
3/b/d/3bdd59d8874cefbe.jpg
f/d/b/fdb6456068af0864.jpg
a/e/c/aec4fe4147e16b3d.jpg
c/e/1/ce1c8161827766ba.jpg
9/5/5/95516255e8768a32.jpg
a/d/5/ad5b188b89321a7d.jpg
b/9/c/b9c9ec57bfc1a83f.jpg
9/7/d/97d7b98cfdfc21d7.jpg
8/2/1/821e1fca758729a9.jpg
a/7/e/a7ec742b5c7babe2.jpg
f/a/a/faac7c27a89fa114.jpg
c/b/e/cbed952f3182fff1.jpg
6/a/6/6a6d46cce3ef0ae1.jpg
b/6/6/b663d9362248e9ff.jpg
0/7/2/072a8cd4f09ae999.jpg
d/d/c/ddc30153b103fc88.jpg
5/3/1/531af5a5092cd251.jpg
2/3/3/233c3ec756a6c595.jpg
e/1/9/e1997c96bf22ef5e.jpg
e/a/4/ea4f56200ea419a9.jpg
c/c/b/ccbacdf10d58c9bd.jpg
1/c/f/1cf4954fa3874992.jpg
e/1/5/e1515a362befc5e1.jpg
e/5/9/e59a985726ea83f9.jpg
3/2/3/3235923e27604fd9.jpg
2/e/f/2efbde28d6397628.jpg
f/0/0/f002a33cfcc6bb99.jpg
c/a/4/ca444492cb056055.jpg
a/6/a/a6af8fbcb7c58aa3.jpg
0/b/5/0b5f7fe9d93f605a.jpg
2/2/7/22758b35f9a23e3d.jpg
2/4/7/2476f9c20110e1a4.jpg
c/a/3/ca314ddd5405998b.jpg
4/7/b/47bf2a1e502b5a13.jpg
9/7/f/97fee0269ae80835.jpg
a/6/a/a6af9bfe94033844.jpg
f/6/e/f6e77aa424db3a02.jpg
5/b/c/5bc4d42783ec41b1.jpg
d/2/e/d2e8d8e26d40b3b2.jpg
7/8/7/7870eded63748187.jpg
4/c/0/4c03a51fe7ebbc93.jpg
a/8/e/a8e9805bb18484ee.jpg
a/8/8/a88c780d3b9379ac.jpg
2/5/7/2572ec286d65706b.jpg
9/7/e/97eb3def603feac8.jpg
c/b/a/cbaf8236014d4e69.jpg
d/4/6/d465b3e077e8f39a.jpg
0/6/6/066f0896b31dcbae.jpg
0/4/0/040dd943fee8449e.jpg
e/f/5/ef578e55dccfc97c.jpg
7/0/7/7076ef3146b3a346.jpg
f/6/1/f613f1053e12b60c.jpg
6/b/3/6b35c367fb424e42.jpg
4/7/7/477a8d2dd9dde0d0.jpg
e/5/0/e501795e6ee9f34a.jpg
0/4/5/0451e5a4bb0dff59.jpg
c/f/8/cf8ed4a2ee680ea2.jpg
7/e/2/7e2dd5497e0cd36d.jpg
e/e/4/ee4c482666ce5b45.jpg
9/8/7/987a5e47510559e6.jpg
5/f/e/5feb10beca1fb9a4.jpg
4/9/5/495c0c4794286724.jpg
5/5/0/5509b6d70867eddd.jpg
c/7/3/c73224836156953d.jpg
5/c/5/5c5e5e6211e93448.jpg
e/0/d/e0d0dce6d8616849.jpg
2/8/f/28fe17fa82f4398c.jpg
c/1/d/c1d4e803f768b676.jpg
d/c/9/dc9b1587e711e2a6.jpg
3/2/c/32c9e31dd4074ff9.jpg
3/3/b/33b1b7249ad1d87c.jpg
d/3/1/d31a6bcd035c93d5.jpg
5/2/4/52482dfb30cbf6f7.jpg
b/0/2/b02900bca310205d.jpg
4/c/a/4cac35f3d2a7a0dc.jpg
8/3/7/8376b1af1eba5194.jpg
2/c/d/2cd2936a617fa37c.jpg
0/4/1/04126a6218f8e446.jpg
3/1/6/3166abc252c5d1cc.jpg
a/7/8/a78669605615303f.jpg
e/9/d/e9def4a2fadf1b1d.jpg
c/1/e/c1ebf1f7c04f049e.jpg
2/3/b/23b093254326c6a4.jpg
b/4/d/b4dd2716656f9de8.jpg
2/4/c/24c0184217027bbe.jpg
d/0/a/d0ac6117ae18f0aa.jpg
d/0/c/d0c2f0510365217f.jpg
c/0/5/c05a8c31129cfbf1.jpg
6/9/5/695fabe1639f9844.jpg
a/c/1/ac1b4b40bd1b9fa3.jpg
2/e/2/2e2254bb4afc3b57.jpg
d/b/2/db21384d6d958668.jpg
8/7/6/8764381fd064844f.jpg
2/5/4/254a69af3d69ec1e.jpg
4/5/c/45cb8c6f2b25c7d7.jpg
9/5/6/9568638a967206d1.jpg
7/d/f/7df5807722192184.jpg
c/8/7/c879d46b8be5d45f.jpg
9/f/2/9f20fbdfb3a44315.jpg
5/7/9/57927fd9e86bea33.jpg
c/3/e/c3e4f1f79e4097ad.jpg
7/3/5/7358c56c1dcecb7b.jpg
1/9/c/19c5df821c88b4cf.jpg
2/5/2/2522cdce682d4b40.jpg
d/d/f/ddf50d937080931d.jpg
3/2/e/32e4d8ac60262f40.jpg
6/2/1/621355781ebb930d.jpg
3/9/1/3911577a9caf14e9.jpg
d/e/6/de651a13250f69b6.jpg
d/e/a/dea4490d3aaa7d2a.jpg
c/2/2/c22e6cb0e5a439f7.jpg
c/b/b/cbbd8db628ec5e27.jpg
8/4/f/84f7aec6a7deb1cc.jpg
8/8/e/88e0f019d17d6d5a.jpg
7/9/7/7978b4126f9780c9.jpg
a/3/6/a369ac22ee915f85.jpg
0/2/6/02673e698bb21d22.jpg
b/4/5/b45f0c83224cf634.jpg
4/9/e/49eae11e2f50bc5b.jpg
3/a/4/3a4b5716787ab8dd.jpg
6/3/3/6336c1edaae1bb2a.jpg
3/7/8/3786d3da3ae043ca.jpg
7/b/a/7bace38386033714.jpg
7/8/1/7819c253deb0b336.jpg
1/c/6/1c61d4ef5f309d00.jpg
5/e/f/5ef347f7846bb611.jpg
f/f/7/ff73fc7685266331.jpg
6/2/b/62b911db3ce54e7b.jpg
2/c/f/2cf2153f54c1780a.jpg
8/2/9/829acdfceddadecb.jpg
0/2/1/021cd14476ddff70.jpg
5/a/0/5a0d1e56b06a65a1.jpg
6/3/a/63af4946e06d7d9a.jpg
0/2/e/02e01207bdf7ecea.jpg
d/0/1/d0138b74f9f858df.jpg
0/1/4/01425c0d958dfdc1.jpg
6/9/1/691582047845ccc3.jpg
f/0/b/f0bf6db432741e18.jpg
e/2/4/e242cfc0800d1714.jpg
4/e/a/4ea919807743fdfe.jpg
2/e/0/2e09a58ceb00feb5.jpg
1/7/0/1701837058f37e64.jpg
4/6/b/46b645b04f5d1dc6.jpg
2/1/5/21528a5d9d0b1639.jpg
b/3/b/b3b5f8bf6db7a279.jpg
8/a/6/8a6868111e93abc5.jpg
8/f/3/8f32229e44e32197.jpg
a/b/6/ab64c5d8b192b6d9.jpg
f/5/6/f56d0b1ad174d509.jpg
2/e/d/2ede3df0af6ad58b.jpg
4/2/3/42318a3100d6c112.jpg
5/4/5/545d6b308c57109c.jpg
b/1/0/b108e79c2a4d277e.jpg
0/a/a/0aa780639806310c.jpg
e/4/1/e41bc77ec5f788ba.jpg
0/1/9/0194a4254d4d5623.jpg
b/6/5/b65299be83f0d065.jpg
b/f/f/bffac089bd61db6e.jpg
d/d/f/ddfe797b18c27ac5.jpg
6/4/0/6402b91b6290c498.jpg
d/5/3/d53db3bd83e69c42.jpg
8/a/f/8af30cd55bd9b8d8.jpg
3/c/0/3c075ff6292ff0b9.jpg
2/4/3/2434a31c1baf0af5.jpg
1/8/b/18b78cefdce90669.jpg
5/2/5/5253039f9ca41d79.jpg
8/5/a/85a11e9d5f560799.jpg
d/3/6/d3604af1453ec5b4.jpg
0/3/4/034c76694e2d20e1.jpg
b/d/c/bdcba9acce2553cd.jpg
7/d/a/7da25efce307d5bf.jpg
c/e/1/ce18282fb9cb2dad.jpg
e/d/5/ed5bdd6403fa493d.jpg
7/c/6/7c63f3cf3d6e7927.jpg
b/5/9/b597271d3ab73c91.jpg
5/0/a/50a8e0bb67638aed.jpg
9/9/7/997a03a1d2007340.jpg
7/6/1/761d0b0830ead0c3.jpg
4/e/0/4e093aebaad30f10.jpg
b/5/f/b5f7197192c12372.jpg
1/1/a/11a429effec2ef77.jpg
5/8/e/58e812762f038c0a.jpg
0/9/b/09b222ee4214624d.jpg
6/f/6/6f69af98232aa26c.jpg
d/0/9/d091abed3ae3355b.jpg
8/4/b/84b73b8c3809fd5d.jpg
2/3/0/230e4687f714e23d.jpg
1/b/5/1b5ccf3fb5dae80e.jpg
5/5/e/55e02f435aa64fd6.jpg
e/f/7/ef7e56bf1fff9957.jpg
a/3/f/a3f57597267f6e32.jpg
9/3/5/935f9a97d2fd13fc.jpg
9/9/4/994acc330780c2f6.jpg
f/d/e/fde3828c8b928cb5.jpg
6/f/3/6f38f470a3f1b779.jpg
d/e/b/deb2f8b62890cd26.jpg
a/7/6/a768c00e8f18636a.jpg
f/f/b/ffb25ac1ecbd8903.jpg
0/4/8/04868956bbf9a4f8.jpg
e/e/f/eef12adc86d733db.jpg
5/9/6/5962eff406257f13.jpg
a/5/3/a53f29accb9d27ea.jpg
a/b/0/ab09f9c23eb5d0fe.jpg
a/9/1/a91e9448bd6fb5dc.jpg
6/c/0/6c0ab867956357ef.jpg
d/b/5/db5090ffa7ae730f.jpg
4/1/0/41095ffef8e6e855.jpg
c/8/5/c85cfb5925be3208.jpg
f/f/5/ff595a5095e4bd5e.jpg
b/c/7/bc7e684a0a1c2ffe.jpg
1/8/0/18020cd492d756cb.jpg
5/8/1/5814f35555348f61.jpg
d/7/9/d79a09f5610d5700.jpg
f/a/c/fac5d552faafd500.jpg
c/4/f/c4fda42284da494d.jpg
c/b/2/cb2e360d4729f6a2.jpg
3/8/4/3846b8570d4d8b5a.jpg
d/f/a/dfae49b4e4241a51.jpg
f/a/a/faa032f751ebb1b0.jpg
a/0/3/a03a809176cd9688.jpg
6/e/a/6ea25fc154b5d0f5.jpg
3/e/d/3ed9a9c06f26a2a3.jpg
8/9/4/894a72f489111e71.jpg
5/f/1/5f176393e657392f.jpg
e/d/c/edcc0ca3fa2a9bca.jpg
9/4/c/94cf8be9d6e4b3d5.jpg
d/1/9/d191260f46fa3501.jpg
9/0/b/90b9889b72406f6d.jpg
4/0/5/405237b1a3d3ff1d.jpg
0/0/f/00f9c2fcb07a25c2.jpg
b/4/6/b46796788c2a732c.jpg
a/6/2/a6206e6ac0cefecc.jpg
3/a/d/3adff9b45686a92c.jpg
5/d/c/5dc67c0461124eff.jpg
c/d/a/cda9d13deb22fbc0.jpg
c/e/d/cedd2f02307bf968.jpg
d/9/c/d9ca9def89bf8853.jpg
5/c/4/5c4576c18de31436.jpg
7/2/e/72e856a032ae295b.jpg
d/4/4/d44dc97b5c18b334.jpg
e/5/7/e576a7a6fcdbef3a.jpg
f/b/b/fbb9bb4ab91f9ecb.jpg
1/3/7/13787b608ee6be8a.jpg
7/2/d/72db7b4cc69ac03c.jpg
e/f/e/efe022df926f2434.jpg
4/7/2/4722dd7841c66a57.jpg
9/0/1/901631583863bc26.jpg
2/e/b/2eb70f5f7e688994.jpg
b/d/f/bdfc81b62c7b0d7e.jpg
c/e/d/ceded2e7e21bbc3b.jpg
a/3/1/a31dcc78dcee89d7.jpg
2/8/7/287368abfc5b4e37.jpg
f/5/a/f5a269e5d75fad10.jpg
0/e/7/0e7c4ca789f6a304.jpg
3/7/9/3794fcd447814e97.jpg
6/9/1/691fdf9f2fee915b.jpg
3/d/1/3d17264861c751c7.jpg
1/3/6/136638ca689dfbaa.jpg
b/1/9/b19696628ee8bb27.jpg
1/2/d/12d121177200b2da.jpg
c/d/9/cd98623416b159eb.jpg
6/8/8/688476abe5b5d384.jpg
c/6/b/c6b28aac0b0f646e.jpg
5/0/1/501df1bd22e8ab21.jpg
4/4/a/44a3b076e950dd10.jpg
6/a/0/6a0356a4cdce5e69.jpg
1/5/f/15f00e7a15f306de.jpg
3/8/4/384d12b3602ccd4b.jpg
a/3/6/a36fb39983cbd3ec.jpg
6/f/9/6f99ee949d5abaf6.jpg
0/e/d/0ed2531caa3f3179.jpg
3/e/e/3ee2c9ae71faa0f2.jpg
8/0/0/8000973c958f810d.jpg
9/7/c/97c08e705e01cacd.jpg
a/f/c/afcf6f9b021eb7a3.jpg
b/e/3/be3e3142a1a0a23d.jpg
b/e/8/be85981ec2a10f09.jpg
d/8/d/d8de01bcedd432e8.jpg
b/7/0/b70c0b095197fe93.jpg
e/4/1/e41bd159e0868614.jpg
9/d/0/9d06129e07587be4.jpg
3/c/a/3ca4ff295d898b15.jpg
3/6/f/36f86ef3f3bd37fe.jpg
a/3/9/a39ea29e1cea04ec.jpg
6/2/0/620c4c8b21681de1.jpg
1/2/3/123905209ec0c789.jpg
8/4/5/845a29bf981c2b8d.jpg
0/c/1/0c16ace27f24a9bb.jpg
6/c/5/6c5eac46b3358ec7.jpg
7/7/d/77d363605a3a19c2.jpg
b/9/4/b940cb5d24778c31.jpg
e/8/d/e8dc05c19025f9f5.jpg
c/3/9/c398bc22f0c60626.jpg
d/5/1/d51d8ae040c294df.jpg
6/f/6/6f6aa2a8269909c7.jpg
5/3/3/5334cad320d50f96.jpg
5/b/f/5bf48f7b7af7cc3f.jpg
c/0/0/c0060df75a1bba6f.jpg
0/b/3/0b38fa937230e607.jpg
2/3/d/23dc43cb0bc4c155.jpg
1/9/8/198045106cb8178f.jpg
3/9/3/393509756f49a0ed.jpg
3/2/a/32ad2961bd4de1f5.jpg
9/9/7/997ad9f38db467c3.jpg
4/a/d/4ad9994e8556b373.jpg
1/4/f/14fbba07d70f46c7.jpg
0/9/8/098ef810e648e1a3.jpg
5/0/d/50da9903d8a977c7.jpg
7/c/e/7ce3d71ce7cea673.jpg
e/1/4/e140d88017c8496d.jpg
4/e/9/4e98c69b0696361a.jpg
a/f/c/afc37605a2775b1d.jpg
d/3/8/d38b233117d42234.jpg
8/4/2/84246ff22e2acbb0.jpg
6/1/3/61369c442b3ea91d.jpg
b/f/e/bfefabef81670dd4.jpg
b/4/0/b4064f9c4af24f6b.jpg
c/9/f/c9fb60250855d726.jpg
f/f/a/ffaa51ed39632fff.jpg
f/2/e/f2ee916c88847cfd.jpg
3/9/2/39264ed9811e925c.jpg
4/4/3/443635a19d0577ae.jpg
1/6/0/160f05f4de33df72.jpg
0/e/4/0e4c564210575f9c.jpg
2/5/9/2592c73eab106727.jpg
9/0/8/908a091b72df2bad.jpg
3/d/6/3d69f44fc6f97c6e.jpg
a/1/9/a19d6298c7a9da71.jpg
c/f/9/cf930cbeb3a59672.jpg
5/a/5/5a54221d913ec9c9.jpg
0/b/4/0b4d35809fccdd80.jpg
5/4/6/546f497d46c8f6c8.jpg
1/c/6/1c6390e48392b98d.jpg
8/4/9/849cf27a03055078.jpg
7/5/c/75c299bf41a22d52.jpg
c/8/7/c87f6d1cc938f3ea.jpg
1/4/7/1473cd8ef77bae12.jpg
4/5/e/45e31175b6341656.jpg
f/9/7/f9747f6680d29444.jpg
a/d/b/adb68b8be93e330a.jpg
d/2/b/d2b2ef25cb9bcfd9.jpg
e/1/5/e157bffd81b0d681.jpg
f/9/5/f955ff7f8731af7a.jpg
d/c/c/dcc128249e41efac.jpg
4/8/7/4871bc860374f0d2.jpg
a/6/a/a6a3be879a70ed79.jpg
4/9/e/49e6688c12fae43e.jpg
f/7/8/f7879fe1a795dbad.jpg
1/d/9/1d9782e30d815d44.jpg
9/d/d/9dd88f9d2a429174.jpg
8/a/1/8a1c11c7c86c0684.jpg
3/6/f/36fae693880acf6f.jpg
6/1/f/61f1539055d82696.jpg
7/1/e/71e41addcad16ccc.jpg
c/d/f/cdfc878051e11dd7.jpg
4/c/a/4caa526d947caa6c.jpg
7/9/c/79ca4395c6073f4d.jpg
f/1/4/f14f514656829da9.jpg
d/5/2/d5253b27795a20aa.jpg
8/2/e/82e3ed09fe8885a1.jpg
d/9/8/d9873e92b5786790.jpg
9/b/7/9b7f7ff542ca624e.jpg
b/a/2/ba29b7cff41d6efd.jpg
a/d/0/ad05b7fc55796220.jpg
2/3/c/23c600ba563687c7.jpg
2/3/0/230687bb229d6601.jpg
0/e/1/0e102b407bfcea8b.jpg
c/b/a/cba8cb5c8a66864c.jpg
e/4/2/e4241b2abc59f91c.jpg
5/8/a/58ac80ad7411fcb3.jpg
7/e/1/7e1663c59a136a81.jpg
1/b/b/1bb58c0e98c793cb.jpg
0/7/1/07111d5cc609387e.jpg
3/3/5/33583f8100c0b85e.jpg
c/1/7/c17ca0af847e17f5.jpg
5/f/a/5faf9313bc45f53f.jpg
c/6/6/c663122e26668d01.jpg
6/d/2/6d20881386b8a3b9.jpg
9/1/8/918838593e4d7ad6.jpg
f/7/a/f7a9dd990017c0e5.jpg
b/e/8/be8f93e363d54674.jpg
e/e/4/ee47a9952d7ae8bd.jpg
0/2/5/025c2518f7122c96.jpg
c/4/d/c4d306ab31b4bccb.jpg
c/8/4/c846ef1150f6c0f7.jpg
b/d/1/bd12d76a0f219fe7.jpg
3/b/2/3b2ebbfdb99c1cd3.jpg
9/3/0/93015cf37add9c1d.jpg
1/1/4/114c3e051a122dc4.jpg
4/f/0/4f09ab6039aa5d16.jpg
0/f/e/0feb2e09459fb8b1.jpg
1/2/f/12f35e5230a7928e.jpg
e/f/5/ef5de3a75099e948.jpg
2/1/1/211b3b7071675ebf.jpg
1/9/a/19a13aee1cdf9c0f.jpg
5/7/6/5767e0eb0576d13e.jpg
6/d/a/6da8ea8e167da1f6.jpg
3/5/4/3547c4136de2b4f8.jpg
e/d/d/edd793e874b98bec.jpg
c/0/b/c0be2cdef82524f9.jpg
b/a/d/bad300389467ea2a.jpg
b/3/9/b39d5c224763a277.jpg
9/e/e/9ee6801016ebfd88.jpg
5/e/b/5eb6ec87bd280ee9.jpg
4/f/5/4f5fd14d5d92284a.jpg
0/8/2/082f9ec1d945a4b9.jpg
a/2/7/a27e2b522496ec75.jpg
a/5/1/a513a4b190101790.jpg
3/b/3/3b3676d4f33a3b91.jpg
4/f/8/4f8c134aa15574de.jpg
2/2/e/22ef6d8d06f979a2.jpg
2/d/a/2da9b5c1f772c022.jpg
9/3/5/9357d25146213f5c.jpg
5/f/2/5f28ff7b10545d87.jpg
b/2/9/b29c28f675d0dbe8.jpg
a/0/a/a0a509b2fd385cc4.jpg
c/f/3/cf34bee9b08196d4.jpg
2/4/8/248edac6a60ed9e8.jpg
6/e/9/6e9408c23b945f61.jpg
2/c/c/2ccec22838eb1ffb.jpg
7/3/a/73acaf69793aa461.jpg
0/1/3/013484b1f3751eac.jpg
d/6/3/d632aa44d9f591ad.jpg
5/d/a/5daadcea809ad788.jpg
9/7/0/97083d131e5cef6b.jpg
9/f/b/9fb69d25ebeb089a.jpg
2/b/3/2b3c61fb13eb57dd.jpg
d/a/a/daaf18abcc84b41a.jpg
8/9/4/8940acee49d58d2f.jpg
1/9/b/19b13e5b303f1b95.jpg
2/e/1/2e14e038c42d7a58.jpg
8/1/f/81fd9e8c6c02c684.jpg
9/9/9/999415665e435459.jpg
d/4/7/d47cfd900998dc22.jpg
1/1/a/11aa598a9e884f10.jpg
3/9/5/395b154416aadd55.jpg
4/6/d/46d1b64b8b1f1e23.jpg
d/3/e/d3efed42c759ada3.jpg
2/9/0/2906abd7e8712ded.jpg
e/c/7/ec7b31e6e9031cdf.jpg
7/6/0/760a81fab813dfe6.jpg
8/9/9/89922ba25f158f9d.jpg
2/e/2/2e262bcd36dcfc92.jpg
0/0/e/00ec7403eac63c9f.jpg
d/0/e/d0ed6023d84c42c6.jpg
b/a/6/ba616892a3fc8ab2.jpg
4/6/b/46ba5a3bf1cb8c81.jpg
2/a/b/2ab9192a6a10fb60.jpg
d/3/7/d37c09e8c39192dd.jpg
3/7/f/37fa2b4aa188fcf3.jpg
3/8/2/38250b175e1d555f.jpg
f/6/7/f672f31fb6853b79.jpg
5/3/d/53d9a454d3c92fcd.jpg
4/8/5/48506a0827882fda.jpg
a/b/b/abb62c9587e99792.jpg
d/a/b/dabf85a8ebb33c04.jpg
4/7/e/47e6fab200617907.jpg
b/c/f/bcff5d5abf27bbdb.jpg
b/a/c/bac6f09f5d002541.jpg
b/c/5/bc5e3323f3dbf834.jpg
b/2/a/b2a1d80b2245e2f3.jpg
8/f/2/8f2de580adcc6060.jpg
3/4/5/345e71504233a058.jpg
f/9/9/f996b245c56fced6.jpg
b/c/c/bcc1c52627d8168e.jpg
6/2/d/62d94cd12f4588f6.jpg
b/1/0/b104891b20ab3e12.jpg
9/a/7/9a7dd73b30bbe4cf.jpg
2/c/4/2c46c22a44f68d1d.jpg
d/5/8/d58bd5e64dc01bc1.jpg
6/d/5/6d58b17a4915f590.jpg
8/1/e/81efb6888e49c152.jpg
2/3/2/232a14719d32ca56.jpg
8/4/1/84158a3d5a39023b.jpg
9/8/6/9860ca2a6677f342.jpg
9/9/a/99a6f3e4313fe5cc.jpg
4/c/6/4c6b7fff838c5144.jpg
b/1/6/b16894b7936dc026.jpg
9/1/9/919502d8870aaae9.jpg
a/6/c/a6c6394fb03f89b9.jpg
2/8/8/28805d0a3a36ef2e.jpg
4/9/9/499932e99cc970e0.jpg
9/b/6/9b6ceebaf44ad5f9.jpg
e/a/e/eaede8375b1ad8ab.jpg
0/6/c/06c8a6993aa87613.jpg
8/4/6/846dd1d45da61fc2.jpg
1/d/5/1d5aec62f116db64.jpg
b/7/2/b72083ebbab5ee77.jpg
0/3/6/036ff4ed8a8f4633.jpg
8/e/a/8ea7273dc3477fa6.jpg
2/3/6/2368af9fedeeab9a.jpg
1/d/7/1d7f392ce4480d66.jpg
b/f/f/bff824cdb97c1493.jpg
7/1/3/7130890fc9b79d68.jpg
9/7/6/97654ca2ae5356a4.jpg
0/7/c/07c729a2ab31a570.jpg
e/7/0/e70bb328a722ae49.jpg
9/5/0/950024c3afba858e.jpg
0/5/f/05f16362bfffb846.jpg
4/1/e/41eaf1b30f108597.jpg
1/1/e/11ec9f54c496885b.jpg
b/7/a/b7a4df20c5a10463.jpg
f/7/d/f7da80687c3590db.jpg
1/8/9/1892c80d0c655c0a.jpg
f/2/7/f279d7fb824798b9.jpg
3/b/4/3b4eddbcbdcece67.jpg
7/1/0/71064e6bb4e3c94c.jpg
d/3/a/d3adaddbae195c26.jpg
6/2/d/62dc8e90c350de5a.jpg
4/d/2/4d219daf27cae692.jpg
e/e/8/ee8bad3adebc58fb.jpg
5/6/8/568e8dc76f6be769.jpg
e/5/f/e5f257471d77f563.jpg
5/0/e/50e51f7c56375b56.jpg
7/4/8/74829f01e696dfc2.jpg
1/4/d/14d3aa39c7ad693a.jpg
7/b/3/7b3bdde3b287758a.jpg
9/4/0/940f3c5a878408a1.jpg
1/1/5/115ad90ca1c611d3.jpg
9/1/8/918a2feca94ae4c9.jpg
7/2/0/7208f8c6b7951f02.jpg
4/1/7/417296a5153e3a85.jpg
0/7/f/07f10abf0d5fb1fe.jpg
6/5/1/6513741e6ef25e11.jpg
b/a/a/baa388ecc2e01949.jpg
9/c/4/9c4238e0549e341d.jpg
3/4/8/348afda9eead03d9.jpg
0/8/a/08a0cba03d3463bc.jpg
2/f/d/2fd97f2aec766003.jpg
c/7/f/c7fe50f733b3752f.jpg
0/3/a/03acd00aefaddd9e.jpg
1/2/b/12b9ed873e96f706.jpg
1/3/f/13f76250dca83ce7.jpg
e/3/0/e300c01fd49c84ff.jpg
5/b/6/5b6875285797d04a.jpg
a/1/e/a1e00142c8cafe55.jpg
1/6/6/1660f3e32115e780.jpg
7/b/3/7b39d78fac7e0901.jpg
4/d/0/4d0eaff9c79d609f.jpg
e/0/0/e00fd4afa473600b.jpg
7/a/6/7a678ca585bf0049.jpg
3/e/c/3ec3cb8e4ddcfb0a.jpg
0/b/7/0b7c0d96f540f1c5.jpg
3/c/2/3c2394126d1b4c40.jpg
e/4/e/e4eeb65fdeaba106.jpg
6/2/e/62ef625e30fe17f9.jpg
5/0/0/50013f9e67b2de4b.jpg
f/e/8/fe873b1094608cc1.jpg
3/4/9/3494db6c1ee6340b.jpg
2/3/c/23cbed267fcaeee2.jpg
0/3/9/039d6a7a10123e17.jpg
7/3/8/7383b86cea245ccc.jpg
0/0/a/00ad0bb2537ce146.jpg
a/f/1/af1581f67f396fd9.jpg
f/f/6/ff659bfe6005f36a.jpg
7/8/4/7849a5b42f3bb4ae.jpg
a/9/4/a94147d8f63ef43e.jpg
9/6/b/96b685912bb3bc9c.jpg
0/c/9/0c96e2e2c1928cda.jpg
3/f/2/3f23268c6b40af65.jpg
b/d/3/bd3720c515681544.jpg
1/8/1/1815e15b1228aaa5.jpg
b/2/0/b2034df5f1d1ba86.jpg
c/6/7/c67287b96334c8c0.jpg
a/6/0/a603165096b23539.jpg
a/a/4/aa4ceb5f7c3013f4.jpg
4/4/4/4449377964de111c.jpg
4/7/d/47d0aa4ef5f106b9.jpg
9/4/5/9459e61556866f5b.jpg
6/c/c/6cc0370215b61430.jpg
7/1/1/71129880d3dd0f44.jpg
8/9/d/89d03bef2e77846b.jpg
4/3/f/43ff50f4605f0b76.jpg
d/1/c/d1c87f21f6057b44.jpg
3/5/f/35f5fcaa8ba2c568.jpg
7/9/0/7900146f04121573.jpg
c/b/d/cbd5b579bd7ec78b.jpg
1/5/a/15ada1288e3b5333.jpg
7/d/3/7d3fd8d95752169b.jpg
a/e/8/ae83f2050a1289ba.jpg
f/8/b/f8b341da7e825e18.jpg
6/6/f/66f22e2fd4300d70.jpg
6/f/c/6fc4c25ae1262076.jpg
6/6/d/66de50030edf2c64.jpg
7/2/6/7265acd617773d3f.jpg
b/2/1/b21e181703b68b83.jpg
f/d/9/fd9185dc409db133.jpg
3/a/6/3a64e90752065abb.jpg
7/3/a/73afa0bfd5c225fc.jpg
8/3/3/833de59d20a45ee7.jpg
8/7/9/87980f8e6c113ef9.jpg
d/6/4/d6452a78bee3f900.jpg
f/5/7/f5779d3acd5325da.jpg
c/2/8/c286734f2d43584d.jpg
1/4/f/14f298a8aba9ae71.jpg
3/a/c/3acb9dd7fa3d61ed.jpg
e/7/c/e7ce391e3c14af72.jpg
f/9/9/f99afb53f6f29149.jpg
c/4/3/c431069b8c460b71.jpg
f/7/e/f7ea2f648f7d6f2a.jpg
d/1/c/d1c9de2164ca08fb.jpg
a/2/0/a20ee042b5ada327.jpg
d/4/4/d4449bac1f9b9745.jpg
c/3/3/c33d176d2a77c55b.jpg
2/b/7/2b702c7cf268daa6.jpg
2/d/e/2de916ab0078cbf7.jpg
e/e/d/eed7a2b32470e284.jpg
b/a/a/baaf5380eb41f5d8.jpg
f/3/2/f320231c06552bcd.jpg
5/6/b/56b25a716e84ec69.jpg
2/9/0/2902d11fbe1c1740.jpg
6/a/b/6abdfb3218f91147.jpg
f/f/d/ffd365065689befa.jpg
6/d/c/6dcaf798627bb13c.jpg
e/b/c/ebc39c1f42c75c25.jpg
a/5/5/a55e57760221e9fe.jpg
5/e/0/5e0b282de3535706.jpg
a/f/c/afc1820ac6b38f0a.jpg
8/1/9/819c458518977423.jpg
a/0/c/a0c78d55376f7692.jpg
c/7/d/c7d699bfc9c977f8.jpg
c/e/e/ceeb33584af197d0.jpg
8/c/c/8cceeba44be2a67f.jpg
b/1/2/b124073869c462ed.jpg
b/1/7/b17a16d2ef86fc76.jpg
2/0/d/20d4858ef67c502a.jpg
1/2/7/1270a93788751225.jpg
2/9/c/29c58fda48c1dcbc.jpg
e/b/2/eb21c24ba0933cc5.jpg
3/f/b/3fb712342b13aa5d.jpg
8/f/6/8f6c3a97ca632356.jpg
0/5/0/05030e608411393d.jpg
d/e/2/de2f62a4d3f5ba58.jpg
c/6/c/c6c14b6297654b7c.jpg
5/b/3/5b3f93111d41f2b8.jpg
5/f/f/5ff5f82f35c60e3c.jpg
4/4/8/448af69970544286.jpg
e/f/5/ef5e1731a201090b.jpg
b/0/1/b016fc0ac8e4029c.jpg
e/7/c/e7c8ba053958b524.jpg
1/5/4/15433c4c11c66731.jpg
4/d/6/4d6b5a5156428d3a.jpg
8/f/f/8ff52f602f215f8a.jpg
2/e/8/2e8fa4907c727052.jpg
0/d/5/0d55292ea9623cc5.jpg
4/9/a/49a51e11065e6c0c.jpg
7/d/f/7df0508ea5eaeda7.jpg
f/f/3/ff3cbf063dff8025.jpg
6/0/d/60d99acc5c4fa37a.jpg
a/3/6/a36fd51055bf2010.jpg
b/6/b/b6bc5235aedadbb5.jpg
d/6/5/d65409801e134a92.jpg
8/9/4/894c325bbacc9abd.jpg
4/6/0/4602be82a374c703.jpg
2/1/2/212f39f43ea30ccc.jpg
a/4/0/a4052ebcc82dd768.jpg
1/6/5/1657e592a05412a7.jpg
2/c/6/2c68e5822de3cfbc.jpg
7/9/9/7999e1e0ccb7a870.jpg
9/8/4/98473353d87de505.jpg
e/7/f/e7f253771e2c827d.jpg
9/0/0/9003d603ec5171cc.jpg
4/a/2/4a2820981524f9ee.jpg
8/8/d/88dbe85154115709.jpg
1/1/9/119a98b4fad2a79e.jpg
a/c/f/acfbb6d7b6181434.jpg
2/a/9/2a9c9516530f1dbd.jpg
a/e/6/ae6ffe9e57e075f5.jpg
8/c/7/8c792e7ddaf51251.jpg
3/4/7/34702b191b2b94fd.jpg
1/d/0/1d02f9941d1e15c3.jpg
5/2/9/5292ba6a180dd80c.jpg
6/7/f/67f3316a0d4f1934.jpg
e/b/c/ebc04e024486a6eb.jpg
a/9/3/a93039eac01bc6b4.jpg
a/0/2/a02edc1012bdfa4b.jpg
5/f/a/5fa62904fd9e8af2.jpg
7/c/e/7cecb1b13d80a542.jpg
2/d/0/2d0ba096abae2725.jpg
7/2/d/72d2aff163da55c8.jpg
c/0/d/c0d11acd052163ac.jpg
0/f/b/0fbf936507a98d6a.jpg
1/1/6/11684c6f5fc1f6b5.jpg
f/6/f/f6f3568930bef433.jpg
c/e/4/ce45cd08a118ed35.jpg
c/6/1/c61a0effb8447447.jpg
8/4/7/847896a3fd30fb3c.jpg
f/4/e/f4ef05fab4d328b5.jpg
b/a/1/ba1f4b83d766597e.jpg
d/3/6/d363a329aa96d248.jpg
1/8/0/1804deb80ba3be83.jpg
c/f/1/cf15c65ef52c0e6a.jpg
9/b/2/9b213dadfd9bdf77.jpg
f/b/0/fb035ba156d87203.jpg
1/1/c/11c07c90251e7746.jpg
7/7/4/77406771b16c9a45.jpg
b/c/8/bc8b2ccd705cf603.jpg
0/9/d/09d9fe1d89fea878.jpg
1/e/7/1e763e31cc2759e3.jpg
4/5/b/45b4eaaa7f886af1.jpg
c/7/4/c74f13baf8c42a35.jpg
8/5/3/85357f7216d917c1.jpg
8/0/b/80bbd46fcef912b4.jpg
1/a/4/1a4c3cc2dbeeb9c6.jpg
5/5/f/55f55a8be35eed13.jpg
0/1/7/0177ab10b0b2d545.jpg
4/d/c/4dce26df9d0ded64.jpg
0/7/9/0796efb7b6c6b9f8.jpg
d/4/a/d4a54dbf61069e3d.jpg
6/9/7/697a4a988b552310.jpg
e/d/0/ed050394672de6d8.jpg
0/d/c/0dc29a12ce4db2c6.jpg
3/b/5/3b546a3a427e5d46.jpg
3/1/6/31661a21f67dc480.jpg
3/8/b/38bf495b445eee9a.jpg
3/e/1/3e106aa56159bf9f.jpg
1/3/4/134787ccaa0a346a.jpg
a/8/c/a8c6550bd04ecbcf.jpg
4/e/b/4eb04c09537e2db6.jpg
d/3/a/d3a276384db18a5e.jpg
b/9/9/b992cb47d67440fa.jpg
e/5/7/e570f4c9f4f0c188.jpg
2/2/7/227b727671a8e33f.jpg
d/2/7/d27f577d8d37643c.jpg
b/8/d/b8decc1dbd15da01.jpg
8/9/8/898b2f67baa48576.jpg
7/e/6/7e655f21eaab7bce.jpg
1/e/1/1e1390e8ea50c51e.jpg
d/4/8/d4896e713ffd8ce7.jpg
a/4/e/a4ef1cbd3a0d00ec.jpg
1/9/2/192ad551a793babd.jpg
7/2/5/72590bf9f41df4dc.jpg
a/e/f/aefe27c976abd653.jpg
0/c/3/0c3f47a0e47e5bc5.jpg
c/4/d/c4dc7c8f6507623d.jpg
6/1/6/616782db471ae603.jpg
0/8/f/08f0974f340a02bb.jpg
e/2/2/e225cb00db788597.jpg
b/4/c/b4c05119c2618823.jpg
9/2/0/92054393f38b4dd3.jpg
7/3/f/73fce3584ec4945a.jpg
5/a/5/5a52957ea46e9850.jpg
b/5/4/b54265e92d836e0f.jpg
a/b/1/ab1402a10c014342.jpg
a/7/f/a7ffa7f5de5fab8e.jpg
d/8/4/d846f668b9d100e5.jpg
0/1/2/01299079f57ce785.jpg
a/5/8/a5830f5dcdd3f950.jpg
f/d/e/fdecd0fccc20309f.jpg
1/4/7/147d9ad6dd7bb8ab.jpg
4/0/e/40e6f232b3493063.jpg
5/b/0/5b0f225bcaef25b9.jpg
3/b/0/3b05b5495776092d.jpg
1/f/f/1ff690a6f25775ab.jpg
b/b/e/bbefa53d82b11926.jpg
9/5/f/95f5b67af05d09a3.jpg
1/0/9/1092646bab4b3274.jpg
4/b/1/4b171e0bd5674f12.jpg
a/e/3/ae356f6fdda3328a.jpg
8/9/c/89c124f75cdd3c51.jpg
0/9/8/0984a20031c559b6.jpg
0/5/a/05a470dc24ce8dbd.jpg
8/d/6/8d61100277883d81.jpg
9/5/a/95a6d5d70187225c.jpg
2/7/0/270a6def406b6114.jpg
1/6/9/169860c7c98e6422.jpg
5/7/9/57981d0620dff4bc.jpg
e/f/9/ef95acb43c2e50e1.jpg
7/9/d/79d998f0fdaa0572.jpg
d/1/6/d16c04b39e065882.jpg
5/c/f/5cf922a2dcb21a78.jpg
4/3/a/43a4207e8e11dc72.jpg
7/e/2/7e27b6288a9a4ced.jpg
1/6/5/165212962f445a4c.jpg
6/6/c/66c3fe09f369fa3d.jpg
d/7/1/d7192db45523014c.jpg
d/e/b/deb7e1642682255f.jpg
7/a/a/7aa11c50c93023df.jpg
8/c/1/8c1563063ea1dd3c.jpg
4/e/c/4ec742a2cf010b10.jpg
c/e/f/cef1a62828f49242.jpg
2/f/2/2f2646b1077e0ddc.jpg
f/f/b/ffbe073684ece16d.jpg
0/5/a/05af644794c30bae.jpg
4/0/9/4098545c1061dce7.jpg
f/f/9/ff949801dcc3afe8.jpg
d/8/1/d81b6ce23a63d288.jpg
c/1/1/c11f054a861615a8.jpg
8/1/0/81019e8033cdbff7.jpg
3/0/7/30756a55b030b2e5.jpg
1/2/1/1216b017860d314e.jpg
e/6/1/e61998c979fee9ac.jpg
1/4/3/143c8012b54cad57.jpg
4/0/f/40fee9675ca154e7.jpg
f/7/9/f79bdd17f6564338.jpg
f/3/3/f33a6c019bacbf74.jpg
a/9/b/a9bbb788b8ff8437.jpg
8/8/4/8845cbdfbcb967e2.jpg
2/f/5/2f53e6487931123c.jpg
8/e/0/8e05806885e18149.jpg
8/e/b/8ebbaad6b01fef3a.jpg
6/6/8/6687d2fcd8b8090f.jpg
a/2/9/a29fce57cae95e55.jpg
e/0/2/e0280891d2fa41f6.jpg
a/a/8/aa82fc9ba0346371.jpg
4/0/a/40aa0880fee6e57d.jpg
6/2/d/62d1769854960742.jpg
7/c/4/7c4b4d5b284f82c6.jpg
1/d/d/1dde9d3e27a4dfc8.jpg
c/4/2/c42fb33ef67ffa2c.jpg
0/b/0/0b038c696461d5d2.jpg
9/a/9/9a96c94d059e0752.jpg
6/6/f/66f5763f2d03e198.jpg
6/7/3/6736d1809ec71461.jpg
1/7/0/170e2359370aa875.jpg
b/8/e/b8e5c520e985e712.jpg
6/1/2/612d4325b25ff2e3.jpg
b/7/9/b79567a882b94669.jpg
7/6/7/76729dad07c9b83d.jpg
4/9/b/49ba90e9e9a59951.jpg
c/8/2/c82bb2d80b80a46f.jpg
f/4/5/f451f8f19ff5fc27.jpg
6/f/a/6fa32c314bfa8cc7.jpg
2/2/1/221b4d4bc532618e.jpg
9/7/5/975720dd9fe36286.jpg
a/3/6/a3660fcec97c49eb.jpg
2/2/f/22f5db865f61101e.jpg
f/f/3/ff307cab1f1d038e.jpg
7/f/8/7f8bae8a877cdcb4.jpg
f/1/8/f1804fcc4f6a2302.jpg
7/d/8/7d821bbe2e4faf93.jpg
1/f/9/1f9aa3a2f13bf4e1.jpg
b/7/b/b7b02625b5f0e2fb.jpg
9/6/e/96e472b9ce5e6c47.jpg
f/d/4/fd40b449ecd3661b.jpg
6/f/e/6fea7fa0bcf4cf85.jpg
5/9/0/59094022a57e13cf.jpg
f/f/1/ff19b263d85cd421.jpg
4/9/a/49aeaeecdfd7ec53.jpg
c/d/9/cd98d8d55833dcf4.jpg
b/0/f/b0f7abe3b0ab9d29.jpg
6/4/3/643a3bc525cff9b5.jpg
c/1/9/c19d91fde606ae91.jpg
a/b/a/abae3f2a1716dea6.jpg
b/9/6/b96bafad98c11d1b.jpg
a/2/b/a2bb3fe3a358aaa5.jpg
e/d/b/edbce4e938511ad1.jpg
7/b/4/7b4bf02580de263d.jpg
0/7/4/0741fc264c0ef790.jpg
6/c/b/6cb7d39bdcb25436.jpg
4/8/d/48d7d2e459ed1b0b.jpg
8/4/d/84d8fb16a7f9ef92.jpg
d/4/7/d47579305d2b58c4.jpg
2/1/e/21ea01d688889b0a.jpg
8/0/4/804f6ecbe8c1472f.jpg
b/8/f/b8f289391cdcd78c.jpg
7/0/b/70b46701b43c3e40.jpg
0/a/f/0af04e0f90962ac7.jpg
7/8/b/78bc0f06ba0a9658.jpg
f/b/9/fb9f495104ee0f40.jpg
d/4/5/d4554c2f890bb7c8.jpg
1/1/d/11ddf6730464f001.jpg
f/2/2/f227f81c8ad1c02c.jpg
d/7/0/d70b907ac8569109.jpg
5/1/d/51d73842cf44a635.jpg
b/d/a/bda3cd2ced27d0c9.jpg
4/d/4/4d4d1b861986813e.jpg
2/1/2/212754e8e7f768c5.jpg
d/f/5/df57471fc3d28d9c.jpg
9/4/f/94feb861148a9de2.jpg
b/0/4/b048c4fa74bddf4b.jpg
9/2/b/92b1ce916a987fbd.jpg
4/e/a/4eacf189733c62fc.jpg
f/5/f/f5f0fecb5531f0e3.jpg
b/5/d/b5dc1031d0ec7f41.jpg
b/1/4/b14e2e5ac51b1ee5.jpg
3/6/e/36e46c318bd136af.jpg
c/0/6/c06f7e0b4d7bbc53.jpg
8/1/8/8181c097403da9c1.jpg
9/8/7/987735e42888f191.jpg
5/f/6/5f623d6d84d8dd44.jpg
2/b/0/2b04c3e5792b8701.jpg
0/e/1/0e1c0452da7ae613.jpg
d/0/e/d0e23e47f7faba28.jpg
8/1/5/815ad0586820db1d.jpg
e/f/0/ef069dca55d29836.jpg
f/1/d/f1da6da20b173539.jpg
e/c/d/ecd273d5fa57a14c.jpg
7/e/5/7e5f79ed66d6a826.jpg
b/3/c/b3cbc9373090b3a5.jpg
f/2/0/f204d2b0ff5db900.jpg
7/5/c/75c571857e23fcc4.jpg
f/2/8/f28dd6414eb469d5.jpg
0/7/8/07844c829697f388.jpg
7/0/8/708607cac7042ab9.jpg
9/c/8/9c8bc9f00f471bf7.jpg
b/6/3/b631a427522d6163.jpg
d/f/8/df8c6d68080fc5a3.jpg
c/9/9/c991186653e2c3b2.jpg
3/0/4/30449a49b8449ae6.jpg
7/d/c/7dce15443b63d601.jpg
6/7/b/67b445fc707c55b1.jpg
3/6/7/367773eda14d7780.jpg
9/9/0/990c9121262de454.jpg
5/9/5/59592f8f2b8a9e8c.jpg
2/0/7/207cc45c3d6fbd1e.jpg
b/1/2/b123a741f0a3c6e0.jpg
1/9/e/19eadf459bfd2a49.jpg
5/a/0/5a00040efc0494ce.jpg
0/6/6/06655b4dcb4c7193.jpg
8/a/d/8adb1b26a0732cd6.jpg
3/3/f/33f99ae9e16eed09.jpg
a/0/1/a0186a48e345322f.jpg
2/a/5/2a554cf81c7f2b62.jpg
c/9/c/c9c5729ac8535865.jpg
2/1/a/21a098841073db75.jpg
d/2/c/d2c5947677d241d0.jpg
8/9/a/89a5e49c5c8ffad3.jpg
1/e/b/1eb901a5552e224b.jpg
2/2/d/22dea4b3c8d58733.jpg
f/8/1/f8100adb5107bb64.jpg
b/f/f/bff7406f2e3dd96b.jpg
e/f/3/ef3376524f2cb5e3.jpg
a/5/1/a513e98fe8b0d573.jpg
8/c/1/8c194640d45ed07d.jpg
a/9/5/a95a87afc9396741.jpg
3/2/f/32fae531b3f8bd85.jpg
a/6/a/a6adc92c07fb06bc.jpg
f/2/0/f20fbc1466b4a5e4.jpg
0/f/f/0ffdbd8079451cca.jpg
d/3/9/d39242ef64ffab3b.jpg
0/b/0/0b065db565352354.jpg
e/c/a/eca8cee0a0cbcd49.jpg
c/5/2/c5231e1cf555cfc2.jpg
d/8/f/d8fe7692616a6592.jpg
4/f/a/4fa094a777e9278f.jpg
7/3/e/73eac82565074a46.jpg
3/b/1/3b136abbb29e36d6.jpg
b/2/f/b2fa239e987def26.jpg
7/4/c/74c452541d70c88f.jpg
7/c/9/7c9f859b8525a744.jpg
b/3/9/b391c8f7f4dc6980.jpg
6/b/d/6bd1fc625b0a5cfa.jpg
5/f/a/5fa4e554c8877513.jpg
4/4/a/44a02a9537d2a7a2.jpg
8/e/5/8e54fbafeba313ba.jpg
f/5/9/f59bb1a386799d66.jpg
4/1/2/4129a9b34e02c876.jpg
0/4/d/04d794896c9d97b0.jpg
3/9/b/39b9e6fa9826d7ad.jpg
7/c/f/7cfdd800aff16d1e.jpg
a/1/f/a1f46fc378bead98.jpg
a/7/e/a7e2b118f2785ce4.jpg
a/5/0/a5068bf6dd514010.jpg
c/f/c/cfc04ad5114c918c.jpg
7/1/c/71c22bc540750a16.jpg
d/8/4/d84223e8ba6688ca.jpg
0/0/4/0046a6df18985cc5.jpg
8/4/2/8421c3f58318806e.jpg
b/3/e/b3ef518c0b32667a.jpg
2/9/7/297f0895c89f406b.jpg
4/c/0/4c02c5de8ec9b149.jpg
d/7/8/d78416c7aeb00055.jpg
1/7/c/17c3e3764a8389e6.jpg
7/c/4/7c41bc13c0a1b658.jpg
c/e/b/ceb4e52be1c17601.jpg
c/3/4/c34f009c9134d844.jpg
2/e/5/2e5bad052b7bf994.jpg
c/5/e/c5eb31090eef5738.jpg
4/d/7/4d7b185f7be527ab.jpg
9/9/d/99d40e82b4198c18.jpg
c/1/4/c14b3ec15daa234e.jpg
a/6/0/a60f0496e1573e62.jpg
a/6/d/a6dd2979cfb62a1a.jpg
4/6/8/468fe8bc4e906938.jpg
3/a/9/3a987085cdbf8824.jpg
3/e/4/3e41c1d9874bc393.jpg
f/4/c/f4c47aafdecc4616.jpg
4/3/3/4332751d6e414730.jpg
5/3/8/5381e16340b1b4a3.jpg
3/0/3/30341c41a584b712.jpg
7/a/f/7af8b4a2e6ca94b8.jpg
6/0/9/609ad40f9135bca7.jpg
3/f/f/3ff73f130aa8adc7.jpg
3/0/0/3007f58bd32561d5.jpg
a/6/8/a68d5aa68294e960.jpg
8/f/3/8f312c0ad6f95bbb.jpg
8/6/d/86db63d43d918021.jpg
a/9/b/a9b3b64ba6c5b281.jpg
c/f/5/cf5d0cbfb1c42003.jpg
c/7/6/c768fe44c8adebe8.jpg
6/2/5/625efbb9057ef297.jpg
e/7/5/e751028d892aaa51.jpg
4/8/a/48a2e63bf733cf66.jpg
1/8/1/181d8aaef271d085.jpg
d/7/1/d71c246ab8f4ef90.jpg
c/5/4/c546063bce1a0d0c.jpg
5/5/7/55793bc68fafebd1.jpg
0/8/e/08e8b6b8ba5c1307.jpg
5/8/0/580ff2599ab9688a.jpg
1/e/b/1ebc6459f290de02.jpg
9/4/0/940f926ec076b32e.jpg
3/2/d/32dcbc636cf4a95a.jpg
f/4/e/f4e6eb03663ae15b.jpg
b/d/c/bdc98495cb16b2f4.jpg
5/1/a/51a2344429389646.jpg
5/1/c/51c520c26f000bcf.jpg
6/b/f/6bfbdddb25e3104a.jpg
7/1/0/710f871fda6682c9.jpg
2/0/0/200160e9b9e90edb.jpg
b/8/e/b8e1f8ebfe08c0b8.jpg
e/3/d/e3d3533509d70ad0.jpg
1/8/d/18d1f7414257c7cd.jpg
a/1/2/a121ae537ca78ffc.jpg
a/d/3/ad37357162090590.jpg
9/3/b/93bf8aafd226411c.jpg
e/2/d/e2d8c59a790774a0.jpg
2/8/4/284090358d2b57c8.jpg
e/6/3/e63dde5cf5b00a1d.jpg
0/9/b/09b4107752f550eb.jpg
0/b/4/0b4c6e4db42b131c.jpg
9/e/8/9e84625d5ab00dbc.jpg
8/3/e/83efc88e01721d7c.jpg
2/1/8/2188cad6f867449a.jpg
1/c/1/1c1a680aefd6aca6.jpg
5/b/5/5b58d12e7563f445.jpg
0/b/4/0b472060c85982b8.jpg
1/1/3/113129eb8a9d3827.jpg
0/a/f/0af5fedf14d89100.jpg
e/9/e/e9ee6cd1b9df9f96.jpg
9/2/5/92557d3170cab61a.jpg
c/e/0/ce0a73e160e7f1df.jpg
f/0/2/f029d0555d588d39.jpg
0/1/f/01fddcb938bc630e.jpg
6/a/e/6aec7d2556231485.jpg
b/1/7/b1707b374742edf7.jpg
5/8/0/5807c46ee11fe332.jpg
5/9/e/59eb24743a6acdc0.jpg
a/a/9/aa9ef90bdba5ea2e.jpg
f/3/a/f3adb55e44909e21.jpg
4/e/e/4ee24d8bdb3570ee.jpg
e/c/2/ec2261ff19973d50.jpg
0/9/d/09d05225bf3bd6e8.jpg
4/a/5/4a5c165503480c7f.jpg
f/0/d/f0d8b0d822ce472e.jpg
9/3/7/937a1e5c655afd42.jpg
8/a/c/8ac537a8d328d7e6.jpg
a/c/8/ac87716b2bb90b21.jpg
9/6/3/9635136eaa6424a6.jpg
1/b/e/1be177951212b711.jpg
9/a/f/9afabd3a8f8d1941.jpg
e/a/1/ea1d2550c606a77e.jpg
f/4/f/f4fbfe5c9613f521.jpg
0/b/5/0b5a45386a936f0c.jpg
c/0/9/c09a2bfb31a876ff.jpg
8/0/5/8053897d4b192e58.jpg
1/8/c/18cbda6d0348f6f6.jpg
a/8/b/a8bb43cf79eb5630.jpg
3/9/5/39532d555f653a69.jpg
0/d/2/0d2f6455aad509a2.jpg
e/4/e/e4e11e93aad929c5.jpg
a/8/c/a8c806f70828a997.jpg
2/9/2/2926858464bd27d0.jpg
b/f/e/bfe38c734ce8aa10.jpg
7/f/4/7f4e771c40eb09ea.jpg
d/3/e/d3e916e19e5decde.jpg
1/4/a/14a8118ba090ffe3.jpg
4/a/a/4aaf42687feafbd2.jpg
2/c/0/2c0093f0ee5be022.jpg
d/3/0/d308b1d9fee251cd.jpg
0/f/0/0f0e8218d6ce5a3d.jpg
4/0/f/40f84d1fabe66e4d.jpg
1/4/5/145b78ae54778eb6.jpg
6/b/c/6bcf6578c27b4ec2.jpg
e/d/a/edafa316fd5e6069.jpg
1/a/5/1a51c79aa20a5c2f.jpg
2/3/3/23348b68d2f17689.jpg
5/2/2/52236748ae420238.jpg
e/6/d/e6dce64ed81ac201.jpg
9/d/8/9d8c43edf1940f77.jpg
f/6/9/f691e6bf93fa00ca.jpg
b/2/a/b2a05e72a97fe3ce.jpg
5/d/1/5d1de88abfe566ae.jpg
e/e/8/ee8f9626b4d2ef62.jpg
b/0/6/b065dab6ff21ea97.jpg
8/4/f/84fe8fdf2f617f93.jpg
1/e/3/1e3afa38865add93.jpg
1/4/6/1465d5782ab39c96.jpg
1/7/b/17b657d1d96765e7.jpg
0/a/d/0adb86d1ae150e0b.jpg
4/1/0/410230ccd4e9f78a.jpg
c/8/d/c8d092f3ef83331c.jpg
9/8/0/9805dcc07369cdcc.jpg
3/7/d/37d686cadb5acf79.jpg
c/6/0/c60b41c62839b826.jpg
3/0/e/30e7fa03dae863d3.jpg
e/f/1/ef1aff1d9766a375.jpg
6/c/b/6cb82bebc89cacdc.jpg
6/d/7/6d7212d6c791a7e9.jpg
d/9/c/d9c282a87ef58c71.jpg
0/1/c/01cc7e8cda924749.jpg
0/a/1/0a1d44942812a654.jpg
c/5/4/c5469d9692eb410b.jpg
3/5/9/35941d5c72764893.jpg
8/a/1/8a1a8ca2e7386fcc.jpg
7/2/a/72a7c3e3c1523d33.jpg
f/7/c/f7cfc3b9a15bb007.jpg
c/1/6/c16291589095d61e.jpg
c/5/d/c5d8447d94ef84c5.jpg
f/5/7/f576bedfed6c9fdf.jpg
3/9/8/398d0149fbf645f5.jpg
7/7/3/773f1bedaabe4ae0.jpg
6/e/e/6ee23df2a4e59dd2.jpg
a/0/d/a0d2dff65c83e778.jpg
c/2/8/c28a1af18c65f348.jpg
5/9/c/59c9216b44343977.jpg
7/1/d/71dcca4ea32991d6.jpg
c/d/b/cdbaa6f87452434a.jpg
0/1/6/016a54a63bf5fb3e.jpg
9/c/0/9c0a2c716eaa8684.jpg
d/1/8/d187528f64565dc1.jpg
0/c/2/0c20da70de1d08ca.jpg
0/6/f/06fa97b46669456e.jpg
d/2/2/d229ed8d56a27e65.jpg
b/4/0/b40d0ecae69e208f.jpg
5/7/7/57734fa0882dc929.jpg
7/a/3/7a37dc247b689595.jpg
d/1/1/d1116b1017c164c2.jpg
d/f/d/dfd62e688f01e0ee.jpg
8/2/5/825af16b4f33077b.jpg
0/b/3/0b398800f95df0a9.jpg
f/f/6/ff62e9bfdc2e3d62.jpg
9/3/2/932fec720f779a9c.jpg
2/3/7/237547f2ba30f31f.jpg
1/d/d/1dd7b858f0b7dc86.jpg
b/9/7/b9708e7ca4696669.jpg
5/4/7/54747831908e3264.jpg
1/1/8/1182710e2e9981d8.jpg
1/e/0/1e0f8cb0472705c0.jpg
e/b/6/eb67364f3360c8ed.jpg
2/4/a/24a75e1b16dfd980.jpg
b/2/2/b2262a2ed8bf85c3.jpg
4/1/2/4121534b52cb6b6d.jpg
1/d/9/1d9517eef5eb7428.jpg
3/5/4/3546e703ea4cbdab.jpg
b/8/7/b87d76fbfbc96a92.jpg
1/f/6/1f67d73247991fdb.jpg
c/0/9/c09995fc7b70f9ef.jpg
e/2/f/e2fccd5714ce7066.jpg
3/e/d/3ed0029879ecb4a8.jpg
f/1/0/f109f089ba8f788e.jpg
3/7/a/37aebd6db8979d0c.jpg
5/b/5/5b5ecd1cbfe1649c.jpg
9/7/f/97f23972c1af121a.jpg
8/0/c/80c1a0204233ca80.jpg
7/7/1/7716e6576f9194a0.jpg
d/f/2/df210f245b003ecc.jpg
2/5/0/2500db16a5754157.jpg
2/1/b/21bdf15d9d77685d.jpg
b/f/d/bfd82d4e6484e5a5.jpg
3/a/5/3a5b550297317a98.jpg
4/7/6/4763742177d41993.jpg
4/9/8/498f948c278882f3.jpg
6/7/b/67bb3135e7b2b125.jpg
9/a/2/9a22933b4890d01e.jpg
6/3/5/635220edbb11b0a0.jpg
4/d/a/4da687ee2bda2703.jpg
a/2/8/a288ecc77b14a6b7.jpg
3/d/4/3d4c6c0e2a84579e.jpg
a/6/1/a61f3dd20c4e7f64.jpg
4/3/f/43f4b892088a42ab.jpg
b/2/e/b2e7c2df33a73968.jpg
7/7/0/77000255d5506b80.jpg
8/5/0/8503ca5feb9be692.jpg
7/8/6/786b5bd023d27725.jpg
8/c/a/8ca714404dd1be9e.jpg
1/0/b/10b3547c87000b83.jpg
0/c/8/0c88071fa122f849.jpg
8/5/4/854b8e50e2447471.jpg
7/6/0/760b3762f43932a1.jpg
c/d/c/cdc709a199575c43.jpg
e/0/d/e0d0d2deb6de3417.jpg
d/c/a/dca3161f47cb829c.jpg
8/2/7/8271a030840274a4.jpg
b/a/5/ba5d927a26b9a6ed.jpg
1/5/8/158b4aef6fb5c801.jpg
2/6/b/26b0f552c3eee1c9.jpg
9/5/4/9547d9ee37691187.jpg
f/6/0/f60c39f6cf94ae5f.jpg
f/c/f/fcf275da78fa4000.jpg
1/c/9/1c9c21fac321a76b.jpg
c/3/8/c3845838f98e708a.jpg
1/e/1/1e150910c1bb19d2.jpg
1/2/a/12a03badb91c3904.jpg
c/9/d/c9d425d7fc7e010a.jpg
f/7/c/f7c58d2bf30cce2b.jpg
1/5/9/15967687e7339d88.jpg
6/2/3/6232daf2e04993cb.jpg
2/0/4/20476fdcdf7d55b3.jpg
9/6/b/96b0715ce634eabd.jpg
b/2/b/b2bce8fffed32f63.jpg
4/f/3/4f3a893bf99e61f3.jpg
9/4/4/944276b2130bc7f5.jpg
6/1/4/61453c81b987db1e.jpg
9/3/b/93b974b775e98173.jpg
1/0/d/10d13e88c72107a9.jpg
0/5/c/05c919261f5dca1b.jpg
1/d/6/1d6b4e11aaf58457.jpg
d/9/6/d967d8ab3502a04a.jpg
1/a/e/1aef1f4ed9cc7586.jpg
8/7/c/87ce0c5e1a0580ad.jpg
f/f/8/ff88a11c6ae1bfd1.jpg
3/1/5/315b09d6f60a1dbb.jpg
2/3/c/23c95975ed444c76.jpg
5/b/9/5b9de082536c5074.jpg
6/0/e/60ec602927c46b2c.jpg
8/f/4/8f485573482d4169.jpg
4/0/1/4017585be0351cfa.jpg
f/5/4/f54007a438422427.jpg
5/5/f/55f6fd0e8ad5bc4c.jpg
2/5/2/252230372fd2134e.jpg
f/4/5/f45d4f48745888b6.jpg
3/4/b/34b618f7a15f2062.jpg
d/5/0/d506634d6e47ed6d.jpg
e/6/6/e66c9543d04c7755.jpg
b/f/a/bfa306cbf7635189.jpg
3/6/e/36ebc1fa1cd0728b.jpg
7/3/e/73e1a676a39f0a76.jpg
f/8/c/f8c63dc1682edfd6.jpg
0/5/9/059b9abbb43edd3d.jpg
b/e/e/bee731fae7f2992f.jpg
9/0/8/9087e3dae8d4b3b9.jpg
9/8/0/980759c2c9e1e648.jpg
c/1/2/c1249a65ab76aa9f.jpg
0/1/5/0156ce7503c989e4.jpg
d/2/9/d295eaabbaf5de56.jpg
e/6/7/e677cbe4d7adae74.jpg
9/b/4/9b4ab89b150e06a3.jpg
d/e/d/ded42c4afb0625eb.jpg
b/d/6/bd6172568754a230.jpg
e/7/9/e79993b323b81801.jpg
b/5/7/b57c5a673d2a0845.jpg
f/9/1/f912ee40a531e843.jpg
0/f/5/0f5d16b19ceb3fd0.jpg
2/3/b/23badac5c07ce99a.jpg
9/a/d/9ad3f71e8771a6ea.jpg
3/0/6/306df4cd30a9dbdb.jpg
b/1/7/b177915a88fc2cda.jpg
9/0/6/906853b0ac2d089d.jpg
3/d/3/3d378f2ef840745b.jpg
5/0/d/50de9f03f727378e.jpg
4/3/d/43d4d33af0afadda.jpg
8/8/3/883b4bf26baa07f5.jpg
2/2/6/2269e0ae732e201a.jpg
2/8/d/28d8f3e2c7831ca4.jpg
7/4/4/744144a3486dc747.jpg
c/a/a/caa429a9f1c7e91f.jpg
5/1/f/51fdb15114bed482.jpg
e/8/d/e8d6bdf898b8db18.jpg
4/9/6/4966b55b5132381c.jpg
6/b/b/6bbb4619b26accc4.jpg
2/f/c/2fc1e8f6bf62274f.jpg
1/c/3/1c38cf982d72a19e.jpg
f/e/2/fe205fd460dcb106.jpg
d/4/a/d4a4a5b40e97c7b6.jpg
9/6/0/960283e1c53c4b78.jpg
3/8/3/383859ca88e998dd.jpg
8/d/4/8d46ac841938ef87.jpg
3/f/0/3f0efda9775b02bf.jpg
8/3/7/8374685fde5037c0.jpg
8/b/e/8be5f33319897acd.jpg
c/b/e/cbee0280dec80866.jpg
0/e/9/0e994901d79446c2.jpg
c/4/e/c4eec8b48872c598.jpg
6/5/4/65436ffc1a12d13d.jpg
d/6/5/d6517c9c32252d77.jpg
7/0/b/70b1c960b20da03a.jpg
e/d/4/ed48ce8ac9b713d4.jpg
d/3/d/d3d67d173745e12c.jpg
b/0/c/b0c899a315468996.jpg
e/4/0/e40b15ec0917d910.jpg
5/d/8/5d8d2c6b2aa7f3e5.jpg
f/1/1/f11a66b9a161644a.jpg
c/1/8/c18b8c251253320d.jpg
8/5/a/85a14b30489f5941.jpg
8/1/2/8123fadb8a08db1e.jpg
e/e/0/ee0b494faf70be14.jpg
8/0/a/80a2c20be3953c50.jpg
c/5/1/c51f6142b63360ee.jpg
f/4/f/f4fd419366b3f028.jpg
d/f/7/df720f64f93de36b.jpg
e/e/7/ee7ff4f4869cc2c1.jpg
4/5/a/45aadf00d44c65d4.jpg
4/1/5/41521347f6db7af0.jpg
2/f/f/2ffdf4abb3a50d49.jpg
0/2/a/02a09482e47bb935.jpg
9/5/b/95b276196b9dee7f.jpg
e/3/7/e376cec801a15c07.jpg
0/3/8/038bdfd00e09d422.jpg
c/e/0/ce0ce2fa060ef45c.jpg
8/2/8/82804637802a8830.jpg
b/8/a/b8ab1243f8b5604a.jpg
5/b/4/5b475388477df932.jpg
f/3/0/f30c3c61f43869c9.jpg
e/9/c/e9c81cc86bbb99ff.jpg
9/0/1/9011470a0bf35f0a.jpg
9/9/c/99cf048ee3f2de74.jpg
0/d/a/0da05e052f934979.jpg
4/a/9/4a957e596cacef6e.jpg
2/6/c/26c3bb6b3fb31771.jpg
6/5/d/65d7936cfb12fd0f.jpg
d/d/2/dd23102fcf5726d2.jpg
f/8/5/f85aa5aa2dd3993a.jpg
3/7/4/374821baa606f2fa.jpg
1/e/b/1ebd34765511af39.jpg
9/3/b/93bedeff4f890463.jpg
2/1/4/2142a3f4498137a7.jpg
3/f/d/3fdca48340acc82b.jpg
1/d/2/1d28aea34f74eabd.jpg
2/f/6/2f6422683dfb9e36.jpg
f/b/b/fbbd26161b448f75.jpg
9/d/d/9ddb79302af56e16.jpg
9/d/b/9dbed0b5e4de8173.jpg
b/3/3/b3378ef9cd76c97d.jpg
2/f/f/2ff8f263fe809e65.jpg
6/5/b/65ba168e39ef8f29.jpg
7/e/c/7ecbe6c4391f5b34.jpg
2/a/9/2a9e7f97c8cc6eec.jpg
9/1/4/9145d5b5bbc88d06.jpg
c/e/f/cef51f0a77830aed.jpg
2/7/1/271b3cb24b453b9c.jpg
0/e/a/0ea1b980ac9cb3a0.jpg
5/f/c/5fce2e5acc5c849d.jpg
d/9/8/d98c62e61300d305.jpg
5/f/8/5f8ed967cd414fdf.jpg
8/d/6/8d6e886ec0fb0f06.jpg
3/9/e/39e3a2cf04fb72fe.jpg
5/6/1/5617fd16d1f29959.jpg
7/8/1/78134bdd65d3b928.jpg
f/3/c/f3ce73c73f79c994.jpg
2/7/1/2711165f1fc7819c.jpg
2/6/a/26ada3230e530f2a.jpg
b/8/5/b85a8dc5b1c60c7b.jpg
8/1/7/8177e1c63367e7c6.jpg
9/f/5/9f5b1ffb0180ed40.jpg
9/f/f/9ff266d3a659118e.jpg
4/7/5/47582f8cf7ac0ab0.jpg
2/7/a/27ae6d9777b438a8.jpg
0/9/4/0943025322ee2de1.jpg
0/5/3/053c242bc7f78877.jpg
f/b/f/fbfff5ad51d06af1.jpg
8/e/d/8ed33c944f5ee9d3.jpg
d/c/4/dc4dcac631855bea.jpg
f/d/2/fd263e984e13630e.jpg
6/5/9/65930b0265a9a727.jpg
6/9/1/6917cb6b9bc43635.jpg
8/e/f/8ef96631568391e8.jpg
7/0/b/70bf9dfd628c4e75.jpg
5/1/7/517ed6bc5da86566.jpg
0/1/6/0169dfd63dba4e4f.jpg
1/1/a/11ae62d4e0a78d7c.jpg
b/6/6/b660a73c512f18b0.jpg
2/5/b/25b73ad988474df9.jpg
9/6/c/96c0e16f3fb0c830.jpg
2/4/a/24aa0f49590055a7.jpg
2/5/6/25680d594aa8ef15.jpg
4/a/5/4a55c7f56b59d83b.jpg
5/0/6/5068493e16986b44.jpg
c/7/d/c7d7d6f2dd4be57a.jpg
3/d/a/3daf05c27266da92.jpg
2/2/6/226b02ee5dfb54a9.jpg
a/6/c/a6c66a8637f50c43.jpg
a/4/e/a4eb3b6bb9ab9ae3.jpg
0/5/e/05e0f542585e6053.jpg
1/e/9/1e9b2db056136651.jpg
8/5/c/85ca06c90e82bde3.jpg
9/a/b/9ab1e7a471e94a11.jpg
c/5/6/c5636364b2399ba3.jpg
b/c/f/bcf74c91fe233500.jpg
8/f/3/8f3aa9b449e71c0f.jpg
1/d/2/1d2a708174d3cfeb.jpg
7/e/a/7ea70ca743caed46.jpg
7/a/a/7aa9e0d728a3fc30.jpg
9/b/2/9b2f8d16bc436bd5.jpg
7/8/0/7808af665b5d58cc.jpg
4/9/e/49ec13f4cc04cc9c.jpg
5/c/c/5ccf4cce80af0ab1.jpg
0/4/1/0413b4181da7ff1c.jpg
8/0/8/808621554818f79a.jpg
a/0/e/a0eeb92400258561.jpg
7/4/6/746476dd8ba49834.jpg
b/0/e/b0e176b3b4cdf0dd.jpg
7/3/b/73b07e37e5d7c4cf.jpg
3/a/c/3ac091ae819ef054.jpg
1/0/9/10990ce587606991.jpg
7/7/4/774f5da4eaba76f5.jpg
4/a/2/4a2baec1bc84178d.jpg
a/e/a/aea845e1256aa07c.jpg
5/0/3/503b8eeedb65c87f.jpg
f/2/d/f2d3ba16cfdd9a41.jpg
2/4/7/247e4695ac4490bd.jpg
2/6/b/26b10cef34e7b53e.jpg
c/d/6/cd61420e67d6c78f.jpg
f/d/c/fdca7dc83159df59.jpg
0/3/2/0320bf3046ea99e0.jpg
0/3/a/03a898a0c347977b.jpg
1/3/d/13d09724b35868d7.jpg
4/f/a/4fa3742abcc48e75.jpg
9/4/4/944c972391fc3b43.jpg
e/9/b/e9bee7a792de9485.jpg
0/3/d/03de26ac7231ef47.jpg
d/e/a/dea5a8026a461251.jpg
1/0/a/10afd816ee99e756.jpg
7/1/c/71cf808b9e8ec7d9.jpg
e/7/1/e71b27d56e5c9078.jpg
3/9/4/39422abdeb51d3ef.jpg
f/7/e/f7e6054a727f736c.jpg
f/d/e/fde87845a1dcf402.jpg
f/6/e/f6e51d30e5070433.jpg
6/2/2/622dd6c6a4b55972.jpg
c/6/6/c665925e496c35e4.jpg
9/9/8/998959e810e6af18.jpg
c/6/1/c61306bd8c3e47a5.jpg
7/6/6/76699ff610246e2a.jpg
c/a/c/cac1a5551a7159df.jpg
6/6/6/66668ffc90047289.jpg
0/3/e/03e9072c39df2a8a.jpg
b/7/8/b78122c726aa1c2b.jpg
9/a/a/9aa75e6abef6cee2.jpg
2/b/0/2b03dd32c823f8aa.jpg
6/d/9/6d91ff56a78ab5eb.jpg
b/f/3/bf3ef3eb68e3db00.jpg
3/0/f/30f1ff2904047d60.jpg
2/1/4/214171166a8c624b.jpg
b/2/c/b2c754e831fa9a71.jpg
4/7/9/479ded21fe0c0975.jpg
4/5/c/45caa71eceacd433.jpg
d/9/a/d9a7f18a126e46ca.jpg
b/6/a/b6aba25f77e4b775.jpg
7/0/b/70bccf9ce090feb3.jpg
3/c/1/3c19c2402c695085.jpg
0/9/2/0929639dd63fb13e.jpg
1/3/f/13f9d08f49838457.jpg
d/7/b/d7b5814b308c6cfd.jpg
6/6/c/66c501c13e26d386.jpg
5/2/b/52b5e4b936f8ed79.jpg
7/e/b/7eb767de334a89dc.jpg
1/a/e/1ae9a159384fd8c8.jpg
a/7/8/a7855be8781596be.jpg
d/d/5/dd57766dfd9db3ce.jpg
8/a/f/8affb3cff51c45d2.jpg
5/c/c/5cc849204ae71155.jpg
2/b/5/2b53c1f2a1181021.jpg
e/0/2/e028e8fde9ac1033.jpg
9/5/8/958ede87ba83a428.jpg
6/0/d/60d8fb1b3fbd41f1.jpg
0/3/1/03130910b09f3729.jpg
7/c/7/7c7469a46d914c27.jpg
4/9/7/49779c71d4fa2ae5.jpg
1/8/0/1809947642aaa468.jpg
7/3/b/73b3539e51e51c5d.jpg
6/6/8/6687fb29ca007598.jpg
e/f/3/ef3e1006df8885af.jpg
d/2/8/d281978a236890c9.jpg
b/8/8/b8834fbc77db27cf.jpg
e/a/5/ea542307621a92b0.jpg
2/0/4/204b0374acf7f2b5.jpg
e/7/1/e71978b75f963c4b.jpg
6/b/d/6bda5ce835c6735f.jpg
d/1/9/d199f672bf4b6933.jpg
5/a/6/5a6cfebbed0121e0.jpg
8/2/f/82f98498a070d586.jpg
a/c/0/ac07f837c602d8df.jpg
0/c/4/0c4bb050d2be7711.jpg
2/c/3/2c3f3389b674ccda.jpg
8/4/2/8421d20bad47fed7.jpg
e/8/b/e8b83ba9ed7b0550.jpg
d/5/3/d531646829718166.jpg
3/2/1/321adf01f2c4d269.jpg
4/5/2/4526705129057eca.jpg
7/6/a/76a953b864c39cc8.jpg
7/3/5/73590a084e730dba.jpg
f/5/d/f5de16afdc64f81a.jpg
d/4/0/d40fd4b3f6b66f5f.jpg
2/5/2/2521eaa1b5b1cdb6.jpg
d/2/8/d28333d8c600d823.jpg
4/3/0/430cd89749b01084.jpg
1/8/f/18f9abee419329b2.jpg
2/d/d/2dd151caeb96411e.jpg
8/9/a/89a906014ed5c679.jpg
9/0/2/902852e0c5c92611.jpg
2/a/7/2a7a8a69060c55b0.jpg
8/9/9/8990dc38132d9681.jpg
1/d/d/1ddf3b793186496c.jpg
4/a/f/4afade433e8487fb.jpg
9/d/f/9df0cce823e09167.jpg
9/1/d/91d0e06208004d5a.jpg
e/3/b/e3b53a3866548706.jpg
a/7/a/a7a3d6564a5a3c07.jpg
4/7/c/47c8e1cf48a91ce8.jpg
d/0/8/d0845385ba053bef.jpg
4/2/8/428a248968689e99.jpg
5/d/3/5d35b3782ce8a5e0.jpg
a/e/2/ae20662a9cfc6cc7.jpg
2/6/5/2657130766d436f1.jpg
2/2/5/22509a4f1953a38d.jpg
5/3/7/53728c95944e41cf.jpg
8/b/5/8b548ac83d33e357.jpg
f/5/a/f5a2d7f126fb83d0.jpg
8/e/1/8e1e8456ebb98692.jpg
4/d/0/4d040fd2a8a850e9.jpg
3/7/5/37589cbbbbc4892f.jpg
2/c/f/2cfde4fddf57ab25.jpg
2/9/4/2946859ec435208e.jpg
7/8/8/788fae266e903b73.jpg
d/6/8/d68549f697596bdc.jpg
4/5/0/4500c0133822cd59.jpg
8/6/3/863f426d06cb789e.jpg
b/a/d/bad431d25d2d2541.jpg
b/8/7/b87ddd3a7205f051.jpg
1/3/6/1360f0a0bc8c880e.jpg
a/8/2/a82d89ca4b8ed741.jpg
a/b/2/ab25f1b15daac21b.jpg
0/b/0/0b01765d7b952266.jpg
4/2/e/42ebedb2eaa8c0ec.jpg
c/a/9/ca9a719a4c3d0377.jpg
3/7/4/374f1ac0656cc047.jpg
2/9/1/291e85e59279e6fa.jpg
1/b/e/1be3aea1f53dc851.jpg
b/9/c/b9ca1a42ca499ca5.jpg
4/0/4/4047b96d804da566.jpg
3/c/6/3c6b58827b67e03e.jpg
d/f/d/dfd9368c69bb4cf8.jpg
4/c/f/4cf177a69b804939.jpg
f/8/d/f8d2f19ccb5a74e4.jpg
8/1/6/8160bc52f8390e35.jpg
f/e/f/fef1d0c26f728b0b.jpg
8/6/c/86c7bb45540e5fea.jpg
c/4/6/c46740fc6feb97bc.jpg
f/4/b/f4be7b749c633e02.jpg
a/9/8/a98c664b50fc55de.jpg
8/3/1/831f7679f18ac72f.jpg
8/f/f/8fff8bef0578eb4b.jpg
0/2/2/022d35f56876038a.jpg
9/5/f/95fa5bfd3bb4515b.jpg
2/b/6/2b6f3be817d5f23f.jpg
e/a/c/eac01b85ed565cb3.jpg
8/b/6/8b6b1939753aae3d.jpg
b/2/1/b2143e5a7efa019f.jpg
b/4/e/b4eadea28e06f498.jpg
9/3/4/9348ece4c746045e.jpg
4/d/e/4de6249cae2bad2f.jpg
c/7/7/c772bf8b03126e85.jpg
6/3/1/6315ea958d7e7bbf.jpg
f/9/d/f9d23c82009aedb2.jpg
2/9/c/29c634d8b0cb76e4.jpg
5/b/d/5bdf2fa5395bc5fd.jpg
b/6/e/b6ebb594eaa77f06.jpg
0/9/f/09f8e20577eaf23e.jpg
b/a/3/ba3017fcaa084e3c.jpg
c/f/d/cfd736ae64342c82.jpg
c/3/3/c331c9d8915d1acd.jpg
a/e/7/ae774e9f7d4ace2e.jpg
6/4/f/64f199ebad6863bd.jpg
a/e/4/ae427b5932f51832.jpg
3/7/c/37c2a2b14c81a50b.jpg
2/7/7/277c136ede2fa622.jpg
f/e/2/fe26a1e2905493a2.jpg
c/3/e/c3eb0bd8b806642b.jpg
e/6/6/e66d562fac448a6f.jpg
4/f/6/4f6f11b96173dcdb.jpg
e/f/d/efd1bb995d1dd0e2.jpg
a/d/0/ad044e498e294b85.jpg
7/7/a/77aeba6b593a4d13.jpg
d/e/5/de5726a54cfe6893.jpg
2/6/7/267f140dadf1cb67.jpg
d/c/0/dc0c8043e2a35871.jpg
8/b/3/8b38e2915eb27cab.jpg
4/e/f/4ef422b498b9316d.jpg
3/d/3/3d3ce4d9dc4c4cc8.jpg
c/e/0/ce083e3fdc4282f9.jpg
a/9/4/a946de04ab301ae0.jpg
4/3/8/4383e06c9eaeeeed.jpg
4/6/9/46915b31307cc806.jpg
2/5/5/2556b5e8b8898d87.jpg
a/a/a/aaa9ae1487944bc3.jpg
6/0/2/602c65241cade91e.jpg
a/2/9/a29fff0bff72f177.jpg
4/0/6/406214c917c10825.jpg
1/3/e/13efb094f3066f03.jpg
0/4/b/04bd5063055c92bd.jpg
9/3/2/932e61d170f3fd3b.jpg
3/7/8/378e573e26ed8daa.jpg
d/7/1/d71a9728a2827f5d.jpg
a/4/7/a472a0e199bc7262.jpg
5/1/1/5115f7711ec73306.jpg
b/0/e/b0e2f56e59768c58.jpg
8/8/2/8826af9d40769741.jpg
3/3/9/33968cdd764396f6.jpg
d/a/8/da85cbcecabb4ea3.jpg
a/e/8/ae817ac089a222e6.jpg
3/2/7/327d416a20fae12b.jpg
4/1/6/416645007c8c6d40.jpg
b/8/8/b8854149fc298df1.jpg
5/8/4/5847e3979e750384.jpg
f/7/d/f7d2a6651260568f.jpg
5/6/3/56306b96ae3102a6.jpg
a/1/1/a11a16230c617020.jpg
7/3/6/73652227cd159ee6.jpg
2/a/3/2a38cfc0da2f950c.jpg
b/2/e/b2ec8ed7c6c5045e.jpg
9/e/2/9e22a05542d133eb.jpg
6/3/3/633ce7c211680b66.jpg
d/b/f/dbfd9f4079da074d.jpg
b/c/9/bc9b7e640d4e1bdf.jpg
b/2/a/b2a2458b17a9c7b8.jpg
e/3/d/e3d75abbab009f8a.jpg
3/7/9/379f1dd6c7ec3503.jpg
0/2/f/02f11f7147dd2ce7.jpg
3/1/0/3104b37b6bf30c9d.jpg
4/4/b/44b973da9472fb36.jpg
a/4/0/a40556f42a646c17.jpg
5/7/5/575cef46adadb0ba.jpg
b/1/e/b1e4d5b44b6fb9c2.jpg
d/3/2/d3272d27bbb4aab9.jpg
5/7/2/57267a4b1cf50b01.jpg
2/1/1/2119492ee44435fc.jpg
b/7/7/b77b77f3d79784e4.jpg
5/1/7/517cb9cfa5a26c5d.jpg
0/9/f/09fa5e3cea80dcaa.jpg
0/1/c/01ca2e8f8100f464.jpg
9/8/b/98ba630436e6f954.jpg
1/6/b/16bdc78ded2b0fa0.jpg
4/4/d/44d90800ee41709f.jpg
1/2/8/1280db0048bdebb8.jpg
4/2/6/426bb0275fa9bff7.jpg
f/2/7/f2796cac06ba749d.jpg
1/4/e/14ef45c7c7883ee0.jpg
a/d/6/ad6c059f539e2ab8.jpg
6/0/c/60c8bfd878cea178.jpg
c/3/a/c3a8dd9ed726b8dd.jpg
2/a/b/2abe79a6ddfa52e6.jpg
6/e/7/6e75a0fc72c814c8.jpg
d/a/7/da7792ca50acaec3.jpg
0/7/a/07a54d1a48a24bb7.jpg
a/b/b/abbb27f03b2d8f78.jpg
c/d/9/cd9f5543754c24fa.jpg
2/7/e/27ec4eee155ec15c.jpg
f/6/7/f67969f70383422e.jpg
7/5/6/756b5f002a2deb6a.jpg
a/6/2/a62d417a58f5b71c.jpg
7/5/a/75a51ff5bf0cf4cd.jpg
b/c/3/bc3ea83f1fff609d.jpg
d/6/3/d633ce56c3100fbf.jpg
c/b/2/cb223d229cdf9770.jpg
b/3/8/b38243c3f2baa044.jpg
3/f/b/3fb4df06f8e9c5b0.jpg
e/8/5/e85dd9dcd8bcee53.jpg
d/b/9/db93e4843f395e1e.jpg
c/6/3/c63cce862125b9c9.jpg
f/d/9/fd9c92f661675d6e.jpg
7/e/b/7eb2fa6738c736cb.jpg
4/c/9/4c9ef37e20da0fb7.jpg
1/f/b/1fbf9941a4414e1b.jpg
9/7/a/97a3c597e31b3cb6.jpg
a/2/a/a2ae5811d146a149.jpg
c/6/5/c65886949716ee38.jpg
a/b/b/abbc345178df2ab1.jpg
2/7/e/27e12cca60850683.jpg
3/e/e/3ee6ea4c395a4afc.jpg
e/6/d/e6d7f3f3cf2e6d0c.jpg
2/d/1/2d19ebb36220b922.jpg
6/1/2/612111b5df5a506e.jpg
d/f/d/dfd3865e95ba147e.jpg
b/1/d/b1dbfa8c89b93ffe.jpg
b/9/5/b95dec60b94c071c.jpg
1/f/7/1f70b350c8b24ccf.jpg
3/f/1/3f164006d42e5d53.jpg
5/8/4/5846dd15bd7a6df8.jpg
7/4/6/746dcd4457cdcc02.jpg
1/3/d/13d0b7973e37c871.jpg
f/8/5/f858137523e7f318.jpg
c/5/5/c5537796a1c20706.jpg
8/0/8/808d0be7d2ecf497.jpg
4/1/9/419eeee29ce69a61.jpg
b/3/f/b3f500d52c4013fa.jpg
7/3/2/7328f98247003fa0.jpg
0/4/4/04420022916ae42d.jpg
b/5/c/b5c018a0eed6779b.jpg
a/d/e/ade64dd9af90de72.jpg
5/0/8/50857ef26988a897.jpg
7/d/f/7dfbfe322d178a7a.jpg
4/5/2/4524307eeb093f1f.jpg
1/4/d/14d671ea42d18b56.jpg
c/8/4/c849f016a6a1e3c9.jpg
f/3/b/f3b7c64e2c584912.jpg
e/3/9/e39b2f02ea8aceec.jpg
7/3/b/73b10b9dd2afd55f.jpg
9/1/2/91250721899b3596.jpg
d/3/c/d3c5660d03b4bb06.jpg
5/e/a/5ea117ab79510ed8.jpg
f/a/3/fa3cf0f62e177efa.jpg
d/8/e/d8e08fa21f8febae.jpg
a/7/f/a7fc39db5c483eeb.jpg
9/3/0/930a8b94f6361839.jpg
8/e/e/8eedbfc7f500c1db.jpg
f/1/6/f162e24ec0f07e0e.jpg
2/d/1/2d1ba68d7b88b5d5.jpg
b/a/a/baadc2294c95fcb4.jpg
c/d/0/cd0e6e480af28648.jpg
3/8/b/38b901af5580645a.jpg
c/4/4/c44399e74029d0bc.jpg
5/9/d/59dc0f77d2149fbe.jpg
d/3/6/d3618027e59678d3.jpg
e/3/0/e30d9b1e6cd24845.jpg
c/c/8/cc831e406bb5e0f7.jpg
1/e/4/1e48ec60eeeed2c0.jpg
a/3/d/a3d422e0d43f987c.jpg
a/f/c/afc26d80bca03563.jpg
6/1/d/61dbd83426fa2ca6.jpg
7/4/b/74bceeebd60cd2b6.jpg
d/7/e/d7ec8285ced25914.jpg
1/a/f/1afc8cea504b3af3.jpg
5/e/6/5e64d0da41680d81.jpg
5/5/1/5517ec765d86b4ee.jpg
d/2/b/d2b2ed7efe12519d.jpg
f/a/0/fa0c33e422db59a9.jpg
d/a/b/dab829b2c501af9f.jpg
4/a/d/4ad905ddcf16d80f.jpg
4/4/2/4427734053669173.jpg
f/0/5/f051d841181c1d12.jpg
1/b/9/1b9b9a6d447a5453.jpg
8/e/c/8ec6689b8dbfbd5b.jpg
b/e/4/be4ac5fcdc42f558.jpg
5/8/1/5814691daa4644b5.jpg
0/6/a/06adf28efc01c12f.jpg
5/1/6/516e83238d9b8de4.jpg
f/d/7/fd709de94b3bc702.jpg
b/6/7/b67189d2e8577ac6.jpg
0/a/2/0a20a00a041e656a.jpg
2/6/2/26297b44231fab86.jpg
5/0/8/50897e1cdcb2478b.jpg
f/0/8/f08e88fea43add0d.jpg
7/d/d/7dd4bd66e9644e7e.jpg
7/2/d/72de7cb523b0d28f.jpg
2/c/0/2c02d7f18bf34a65.jpg
d/6/6/d6631d9646261aa9.jpg
8/e/d/8ede813078ff9bc6.jpg
3/4/0/34021ee0dc290bb9.jpg
3/0/3/30372fc0072440af.jpg
f/1/e/f1eb86b40b794952.jpg
4/8/5/4858d477b2554f55.jpg
3/c/6/3c62c6d19f4ed855.jpg
8/0/5/8055f6a2bdc946ff.jpg
8/5/f/85fecf891e42cae8.jpg
a/d/e/ade08c5cdfebccf4.jpg
8/9/a/89a4189be2540448.jpg
2/3/d/23d5ba7fe68bf911.jpg
7/6/2/7623e797d5e69a9d.jpg
7/1/e/71ea030089eaa8c6.jpg
4/3/7/43734567eae9e0da.jpg
9/b/b/9bbe5db6cf35f364.jpg
0/3/8/038cefc8beba850a.jpg
3/b/5/3b56db3bf489a27b.jpg
b/c/1/bc15a949172857c8.jpg
5/2/d/52dcb5658c3a910a.jpg
9/c/f/9cfd41a4317ef090.jpg
a/8/2/a8283378cd1d0ce2.jpg
3/d/b/3db0c6434f412e63.jpg
c/b/f/cbf0e33f210dacba.jpg
3/a/e/3ae87acae76c5a58.jpg
2/7/1/271bca1b984508a4.jpg
7/9/1/7919ba534007d3e5.jpg
3/e/1/3e1939015324a5d4.jpg
1/7/e/17e97138cf1ca02b.jpg
d/f/f/dff75a5cd44625a3.jpg
8/6/8/86873949e9cc5fe9.jpg
0/d/b/0db5b8f99747a597.jpg
1/7/d/17d827f23ac026ea.jpg
e/1/3/e1391fbc99894e60.jpg
7/8/8/788aa9e2abee2bc0.jpg
f/1/2/f120f96dc4b424fa.jpg
7/f/5/7f54c53253ada427.jpg
0/e/e/0ee0eb9276e8fa4b.jpg
6/c/f/6cf71d7bf4fd0dd3.jpg
f/6/4/f64e504fb94b2f02.jpg
e/a/6/ea644bdee02c6a83.jpg
9/3/7/9374a6eae8c6955f.jpg
e/0/0/e00a2362d025bef4.jpg
c/1/5/c15babf14c40e75d.jpg
9/3/b/93b5dff8a07ecb2e.jpg
c/7/4/c7447fe1a70eb41e.jpg
6/9/f/69fcd08877b01bf1.jpg
5/3/4/53403098507ad199.jpg
0/b/8/0b8fa4152f1bc3ed.jpg
c/6/e/c6e0cedf93c9184b.jpg
b/2/0/b2048ef92852bf66.jpg
1/3/9/13960b661929c367.jpg
0/e/7/0e74f10262eb93f7.jpg
a/b/3/ab3623dd411cee32.jpg
7/6/1/761cf6161eda7f70.jpg
a/f/5/af5a691c77494107.jpg
d/4/d/d4d148c4a662e0bb.jpg
5/4/9/54978225a4bdbb28.jpg
b/2/c/b2c557ed9a1c78bc.jpg
4/0/0/4001e10364b6e5ba.jpg
f/f/4/ff452f233aae1f75.jpg
c/5/1/c51ae096298fbe59.jpg
2/0/6/20648a9e26379c68.jpg
e/9/f/e9f3da771e2a5b7c.jpg
0/f/5/0f5d0d930cab2a92.jpg
1/4/d/14deb6ec7a0ffd1a.jpg
9/4/6/9464faa41d2b497d.jpg
a/0/1/a01570ca2b947cfc.jpg
8/0/2/8022955fcb082618.jpg
d/2/6/d263625a045364aa.jpg
1/6/0/160a6eaf4f6091c2.jpg
b/8/6/b86276c2c14e287f.jpg
e/6/2/e623e4da52f9cc8e.jpg
0/2/9/0296d2848f338666.jpg
b/7/d/b7d6bf8795feeb81.jpg
3/c/5/3c54b51eb5e439d3.jpg
f/c/a/fca31c47b178f24a.jpg
3/2/d/32d1f222871d471f.jpg
e/b/a/eba3be0a25ff9485.jpg
4/0/3/403543785fcb1b4e.jpg
4/f/f/4ffb9430e48ce24e.jpg
c/3/1/c31823d88e51625f.jpg
f/c/4/fc4ddaf9e3fa4f2e.jpg
3/7/5/375674ea4fac6f13.jpg
3/8/e/38e129889af9b070.jpg
3/c/c/3cc4e47004cdbaf9.jpg
d/c/1/dc10c8032ce618df.jpg
6/2/d/62db28e7d36fe908.jpg
a/f/f/aff6b042a2247c61.jpg
5/f/3/5f3d4d96153d98dc.jpg
2/4/2/24224f1174c41632.jpg
f/e/a/fea9f71b3b76a8e1.jpg
c/0/5/c05a83e96bb165db.jpg
7/1/3/713b771877f8f4b7.jpg
1/1/e/11ecaf7ee9b274c5.jpg
b/8/b/b8b4d60eb565aaa6.jpg
5/4/9/549397e850cdfb51.jpg
8/4/d/84d1b59b11e2dc8c.jpg
b/8/3/b83eb1ae978fca1f.jpg
7/a/0/7a083fa3ecc45668.jpg
9/b/8/9b815df9307239db.jpg
a/8/d/a8d03d774e840d81.jpg
6/4/b/64b219f4fa814341.jpg
3/a/8/3a8b5057e9ea25a5.jpg
2/0/8/208d6fb470754a66.jpg
4/1/a/41a93e6f5cb1dd88.jpg
9/b/4/9b4231e064c524e9.jpg
7/4/b/74b9202d64453e46.jpg
2/3/1/2313554883f6de4c.jpg
7/5/0/750f6b72bf48008e.jpg
5/7/a/57ac70cac03d2845.jpg
3/c/d/3cd6d529b54dc746.jpg
0/9/b/09ba7d6ef54bb089.jpg
7/0/1/701346c18c58ce9f.jpg
a/5/7/a5712a19c3f63f3f.jpg
4/4/5/4452568029811215.jpg
f/2/1/f21d2f168253de4a.jpg
2/9/5/295fe02f0b0f6dc8.jpg
8/8/f/88f1f8a8240a34fa.jpg
7/c/0/7c0963ce3afd766b.jpg
7/2/3/7232544d6828ce3c.jpg
0/b/2/0b2183f5ae459105.jpg
b/d/5/bd5f5bf0667913c9.jpg
3/8/8/388eb32db9c58756.jpg
d/0/5/d05415d67f91a6f1.jpg
d/d/e/dde156028005ac2a.jpg
e/f/4/ef43cea813f5d551.jpg
1/5/7/157c80e696d4a9d0.jpg
1/8/9/1895afcbc08e42cb.jpg
5/4/d/54d645d92d4c0fe5.jpg
b/5/0/b50ed4ff7dcee731.jpg
1/9/5/1951142c3952df22.jpg
7/7/c/77cb0c8d2b72e6a3.jpg
1/a/a/1aa5eee0894c6a0c.jpg
4/5/8/458b7ff52ac557d8.jpg
a/2/0/a20a645cf3a1e174.jpg
4/0/a/40a7311dabcab9bf.jpg
e/8/e/e8e77c28544265af.jpg
1/c/f/1cf8f40a414a63e7.jpg
c/7/9/c794edf3d390156f.jpg
1/c/f/1cfd076d275ea709.jpg
a/8/9/a89aff75240fc546.jpg
3/4/1/3414f3bdf9c8831a.jpg
5/5/d/55dce4949e08d14a.jpg
5/9/8/598c6b828a949e2c.jpg
c/2/6/c26f07c785b7284e.jpg
1/3/3/133ffffe6e52f916.jpg
d/1/a/d1a389fcc00c998d.jpg
0/0/d/00d261ebb1177e81.jpg
1/f/e/1fed2013a51b41df.jpg
5/0/7/50717f1f38bbd218.jpg
8/2/4/82486ab279b8c843.jpg
a/a/9/aa98bafb812dece6.jpg
5/2/9/5294e5f2faa9876c.jpg
6/7/4/674e3792335fbbf6.jpg
5/0/4/50470030cf159d08.jpg
2/6/f/26f889422d544931.jpg
5/a/0/5a0bc44c6e69ef68.jpg
2/5/a/25aa576344415898.jpg
c/7/a/c7a69cd07625f4fe.jpg
8/4/2/84279bb1799a6b23.jpg
4/1/a/41aaeffb35c444f6.jpg
6/e/f/6ef382eb671adf1a.jpg
7/5/4/75421506154ec4d8.jpg
6/5/5/65564c5347d09fc7.jpg
4/6/4/4641e55f0f85305b.jpg
4/f/c/4fc69ed4f78bf364.jpg
9/9/8/998330c18e65f6ef.jpg
2/9/a/29a83b57ea84d286.jpg
e/2/a/e2a06ffae4ddd43b.jpg
b/0/b/b0bb8c12de5c0834.jpg
6/2/8/6282faad65e74dac.jpg
6/a/d/6ad69e909caefa17.jpg
e/5/6/e564cb31aa8a53d5.jpg
c/b/a/cba6ae103e7e7b66.jpg
e/4/d/e4de297d965e2923.jpg
d/0/5/d05d7bffd419f714.jpg
7/d/7/7d75b89661e0adc5.jpg
b/5/9/b59c82aaf2055db8.jpg
9/3/2/932ca8204020b703.jpg
4/f/6/4f618104b4f42430.jpg
e/6/b/e6b7d79d386cd6d5.jpg
8/4/1/8416d8572820294f.jpg
4/c/e/4ceb803f89579cb1.jpg
2/7/7/2771bca8460042e0.jpg
6/0/7/607a36bf8aed2596.jpg
9/7/f/97fa21e0b66b55e3.jpg
3/6/c/36c271f7b29b8be5.jpg
c/d/6/cd61378f29dcfe6d.jpg
d/b/1/db1ef0753cb3deab.jpg
f/5/4/f5468382403fdc9f.jpg
d/c/5/dc5ec0ada77ccc3f.jpg
5/1/1/5116cc42c73a3bd5.jpg
2/2/3/2236e8162b6be81e.jpg
a/2/5/a25a3a74fabe27f7.jpg
2/3/5/235c3f47467a507f.jpg
b/d/9/bd906414f08ad187.jpg
f/4/3/f43d2214bbbb33b0.jpg
0/c/4/0c4ee1cac598a304.jpg
c/8/f/c8f632ee8db70b8b.jpg
5/4/5/545846d42a4b7a60.jpg
2/0/2/20259f1e5f487dd2.jpg
9/c/7/9c7bc7d9b0d25def.jpg
1/c/b/1cbe631a2135cd77.jpg
c/7/a/c7a1b07fa1b6c651.jpg
3/c/6/3c6b4876d9c8db6f.jpg
c/c/b/ccbcbbc39950dddb.jpg
5/c/4/5c4e6e533a66d58e.jpg
1/d/2/1d2df5272f6fa96e.jpg
2/6/5/265c906987e0b1a1.jpg
0/2/4/024ddee78d78184e.jpg
f/5/2/f524b8a8482b0dde.jpg
f/a/2/fa2a126fbf5b86e5.jpg
f/8/6/f86b6a0f9f6b5653.jpg
3/1/5/315db5e45cb044e1.jpg
5/6/0/56043ff5ec1875e8.jpg
9/b/c/9bc8b2da54215c44.jpg
3/5/6/356693062ec87924.jpg
7/a/3/7a3c55a107908606.jpg
8/b/a/8baa0ecab840c409.jpg
8/e/f/8ef158919ed23edd.jpg
5/3/c/53cb3444e8b622b0.jpg
f/3/e/f3e2493256424956.jpg
6/5/1/651d79d9d1c9640f.jpg
9/7/1/9718f628e004af53.jpg
b/0/7/b07e7d3fba145938.jpg
8/8/1/881005c017a833d8.jpg
e/6/e/e6e8ea81400bd58d.jpg
b/5/a/b5aba9915777311e.jpg
0/a/4/0a426af0338c4a1c.jpg
c/9/1/c91b4dd640be8972.jpg
7/b/6/7b64c2bcd5fae317.jpg
d/5/6/d563fd37e3278bb0.jpg
9/d/3/9d3108a43f460025.jpg
6/4/6/646cb19e4ec7c4d3.jpg
6/9/f/69f874ebf6d1681d.jpg
4/8/d/48d42aac1bb9a8e6.jpg
8/9/8/898195a4c8a70310.jpg
a/e/c/aecd4a4e7ecde89a.jpg
d/9/4/d9487b9386bd6091.jpg
9/a/6/9a67dd89a016d67f.jpg
1/7/e/17ed149c4754dfcd.jpg
6/0/6/606fdfc0e9ba97df.jpg
0/4/2/0425dab3b87a9843.jpg
9/4/9/94904cfa8446505f.jpg
e/7/8/e7876a477897442e.jpg
4/1/a/41a74d00de24f083.jpg
6/d/9/6d959d755061922b.jpg
5/2/5/5257f412e2ccdf68.jpg
c/1/b/c1bb766c23c1dd40.jpg
a/8/0/a80e5857af5950e1.jpg
5/3/8/5384399a81869c12.jpg
4/f/c/4fc9fe8a658a5085.jpg
f/2/f/f2f80af720de5478.jpg
f/5/5/f55c9c3fd9cbc14a.jpg
c/3/3/c334fd6878e01002.jpg
8/9/e/89e4130a34d714e1.jpg
2/0/6/2067078519b21777.jpg
a/1/7/a17b89a90e6a4e0b.jpg
d/b/6/db60290d36e94455.jpg
1/d/5/1d5202ad762905b3.jpg
6/8/a/68a25e76d1c91525.jpg
1/e/0/1e07958d6accb1ed.jpg
2/7/6/276cbb6562d4123d.jpg
e/4/b/e4bf9acf4613841c.jpg
4/e/1/4e14a9f7d904c9d0.jpg
8/8/3/8838e507303e7e3a.jpg
c/3/c/c3c4dd622eaaf2c2.jpg
8/8/c/88c78644f21fdd1f.jpg
f/c/7/fc75bed372560878.jpg
d/d/a/ddaa8d9799cf1561.jpg
8/b/7/8b76919bdd0cedac.jpg
5/5/d/55d11ac2944b027c.jpg
b/e/1/be1981fdd1ce5c58.jpg
3/1/8/318969b5c20fca3c.jpg
b/9/7/b9773a591b3000ce.jpg
6/8/6/686414c715877cb2.jpg
b/8/0/b80fd84f95ac3416.jpg
8/2/a/82a886ddfa22e8d9.jpg
6/0/7/607223487480f0bf.jpg
5/f/4/5f4407c023a0dc1d.jpg
c/9/d/c9daee3f8f5243ed.jpg
7/5/9/75980f587a2223e3.jpg
5/0/4/50493040f21f0755.jpg
b/d/f/bdf4a893eed55820.jpg
9/c/9/9c93c8e4d9ba1a28.jpg
6/3/e/63ec7ae3c95b6c26.jpg
f/b/9/fb9a7bd648cb68d7.jpg
e/2/f/e2f3f4d6005a02b6.jpg
f/8/7/f872ee25218879fb.jpg
6/6/1/6618bbeff7bb31be.jpg
0/1/4/01479fa1c361d591.jpg
4/c/d/4cd4ab9d0f6b3b40.jpg
7/2/a/72a715938ed21458.jpg
a/d/e/ade99de0b74dd31c.jpg
b/c/c/bccea0e49210d5d7.jpg
a/1/e/a1e981134f7d07a9.jpg
4/3/d/43dee2d05efcf8db.jpg
5/6/3/563b909d9b20d521.jpg
2/b/0/2b0934fde48d5db3.jpg
6/b/4/6b4372ade57b966c.jpg
6/8/3/683f750e1f59db05.jpg
6/c/3/6c3c9df525374a88.jpg
1/7/3/173020cee602cf0a.jpg
7/f/f/7ff3177d1afd6c8c.jpg
9/3/7/93770f0940b2fc46.jpg
2/c/6/2c6c812da232a43b.jpg
9/2/7/9275bd2e53276565.jpg
6/5/1/65108efaeff69c70.jpg
7/0/f/70f49a560074a019.jpg
0/c/1/0c14b5d25f8f6cb9.jpg
a/b/7/ab7729654e190091.jpg
b/b/6/bb6eb9630dac4303.jpg
4/3/0/4300ad8048c69bf6.jpg
a/7/2/a725c5be47f88cbc.jpg
5/c/1/5c1aeda5afd327ae.jpg
1/4/4/144496008c114bd4.jpg
7/9/a/79a76ecbf85b88c7.jpg
e/a/0/ea01362312848b9b.jpg
f/b/f/fbfe9f2a64a62451.jpg
f/8/9/f892ce8021af171e.jpg
4/e/d/4ed6e0014312dda0.jpg
3/1/6/316d82095ef18856.jpg
2/2/5/225c92c955e64712.jpg
3/3/2/332e97cb735b491d.jpg
4/f/f/4ff0b87793ee5e0b.jpg
9/3/d/93d195214b2211f3.jpg
b/9/8/b98376aea3849574.jpg
0/d/1/0d13e5e8fe969710.jpg
d/0/f/d0f033037182003e.jpg
4/6/e/46ee5bd136c0a5b1.jpg
6/b/1/6b1dc7a78210938a.jpg
1/f/e/1fe2550e7d94391d.jpg
c/d/0/cd0788d00441ddf1.jpg
5/f/9/5f9e42d50934d330.jpg
b/5/a/b5a51c3426b14842.jpg
5/2/0/5204a6a5470c6dff.jpg
5/2/2/52211884bfeff3b8.jpg
2/b/3/2b30cc36d2f56b77.jpg
0/d/6/0d6017917ac98887.jpg
9/2/a/92a9b3947787152c.jpg
e/8/c/e8c485d775e984c2.jpg
c/5/3/c534323c286798e4.jpg
6/a/b/6abdc9d78ca3e0d6.jpg
6/8/f/68f0c8d7d368efeb.jpg
5/6/f/56fc2382dd970184.jpg
1/7/6/1769222fd8b871fd.jpg
3/f/2/3f218ed69eda8659.jpg
3/9/d/39db3da6025e674a.jpg
c/b/3/cb33f1e4143821bd.jpg
4/6/a/46aaa3027efdb3c0.jpg
7/6/5/765c70779cd89371.jpg
6/b/8/6b80777524958ded.jpg
5/d/7/5d7bbb5644b328b1.jpg
a/7/e/a7ef080827caeade.jpg
b/1/0/b104463455ee1504.jpg
f/e/7/fe7b4efc9998e658.jpg
9/4/3/943a58ad415d362c.jpg
b/3/f/b3f5f7e6b3c1685a.jpg
f/4/6/f4638f75ea0c9f5a.jpg
2/1/b/21b57fdf0f73de60.jpg
b/6/3/b6335e2e249ddf6f.jpg
9/0/4/90427938dbebd4cf.jpg
0/9/e/09eecfed352ccf26.jpg
c/a/d/cad9cdced3dab99c.jpg
7/7/d/77d261583494a047.jpg
d/3/5/d351f76e68409bf9.jpg
9/5/e/95e1b006f018748b.jpg
a/2/2/a222e7b86b288d70.jpg
a/7/b/a7b03826d1a4de3a.jpg
9/5/a/95a37fdf0cf44c49.jpg
e/4/0/e40d365694952841.jpg
e/3/7/e37234d6b7ec7142.jpg
4/a/8/4a83f0bfce83aca3.jpg
2/7/a/27a6b9ade5978336.jpg
b/4/e/b4ec9ca102b37ef4.jpg
a/3/6/a3676c22cb573733.jpg
4/2/8/428604a4f1350df1.jpg
1/3/d/13d38a5e7382c018.jpg
d/3/9/d39217aa6b46d234.jpg
9/2/8/928013d647287ae4.jpg
2/d/0/2d07753afdd7b72d.jpg
d/b/1/db1474ed32dd5dc1.jpg
9/8/5/98548df974c6a949.jpg
f/9/c/f9c48a041fbd56d9.jpg
c/7/b/c7bcf07d3786fe9c.jpg
d/a/a/daaeb828b8a9c010.jpg
7/5/f/75f7c824cf4e258a.jpg
4/8/4/484782b6bb5bea1c.jpg
6/a/0/6a04786ee644f034.jpg
1/1/7/117feea1be4df27d.jpg
8/b/0/8b008fbd84991cbe.jpg
9/6/0/9608535f0c40e453.jpg
6/a/5/6a5f29f7a1a5a4c9.jpg
6/c/c/6ccfbc8e37671fac.jpg
4/b/1/4b1fba046133a024.jpg
a/7/8/a784dce33d12c796.jpg
0/6/e/06e84999e235d69c.jpg
e/c/0/ec0e5041ad4f7cd9.jpg
5/a/a/5aae20a874438e67.jpg
3/c/2/3c279aed35431ca4.jpg
6/3/b/63b6437053978a21.jpg
1/1/c/11c27b62948b8a91.jpg
e/7/f/e7f1ff4fec1a0287.jpg
d/f/b/dfb27d33f3593abe.jpg
4/d/c/4dc88a4baf70cb32.jpg
d/9/e/d9e50a018f0035bd.jpg
3/d/9/3d930766cbe5c1f3.jpg
1/4/a/14a956d9a998c432.jpg
d/5/e/d5e1965109d0ac30.jpg
3/f/2/3f237e8badeb49d8.jpg
5/b/6/5b6b628d61b98970.jpg
7/9/a/79af32adb15d7e42.jpg
d/7/0/d704640cc8a13f3f.jpg
a/b/a/aba7aa48726c26fc.jpg
c/c/8/cc8a4a02cab66e4d.jpg
5/4/1/541b0afe1a7241ae.jpg
a/6/3/a634263fe39610c2.jpg
e/4/0/e40104981704cfb0.jpg
6/8/a/68a075a54adbd00d.jpg
7/c/d/7cde74f12a76717d.jpg
0/b/a/0bade8288deb4ce2.jpg
a/6/c/a6c6be6a7558ea06.jpg
7/0/e/70ea5b4c86710537.jpg
d/a/1/da14610382def562.jpg
5/b/a/5ba4d5475d7c6718.jpg
3/c/3/3c3c032ea135c8bb.jpg
1/d/c/1dc22b98503c90ca.jpg
8/7/b/87b636fc22842e01.jpg
3/2/b/32b3d404c68b060c.jpg
3/0/6/30641b9337af2cca.jpg
7/5/d/75db39ee86b30970.jpg
f/9/0/f90936bf12710336.jpg
b/0/b/b0ba5c39314ac787.jpg
8/a/2/8a2d4e80c91f2fec.jpg
3/0/6/306ac4970bcddd0a.jpg
3/7/f/37f29137fff5c7cd.jpg
7/f/2/7f2975e4fbb5de5f.jpg
0/2/e/02ef32fbc2c42417.jpg
a/1/2/a12cec51c352bf15.jpg
8/2/a/82a633a483382e4a.jpg
e/0/2/e0248b9c1abc0090.jpg
3/8/9/389c18f5bbf12ef5.jpg
3/4/1/341bb4f5f1d2738c.jpg
c/f/b/cfb7d41efcaa0c45.jpg
d/b/3/db373e7bf197920e.jpg
d/6/9/d6972dafe2f9703a.jpg
7/1/4/71420b342a3e1cd0.jpg
0/d/b/0db4dcb013f3bc24.jpg
a/d/e/aded3d51e797c672.jpg
8/5/9/859a5a0f59da6448.jpg
2/e/a/2ea164d247ee8b95.jpg
8/e/9/8e9517e0a2bb690f.jpg
7/f/3/7f3ed0e431466ad0.jpg
9/2/d/92dbdd62b2438d5b.jpg
6/4/0/6401e5e77a8c5b56.jpg
2/0/5/2051e1f6076f0b6b.jpg
2/0/7/207ffae36130deb0.jpg
7/c/c/7cc9eda61a4dd3a1.jpg
e/3/e/e3ee8828bc12f8ce.jpg
7/a/4/7a4cdd2dcb4b647c.jpg
7/b/e/7bec368054c7759f.jpg
2/9/0/290d95c93e8f3153.jpg
6/1/2/61227e4e405a12eb.jpg
f/b/9/fb9633f9de0fa4ad.jpg
8/7/e/87ebfcf2d59c53bd.jpg
7/b/d/7bd1effc7d40a98a.jpg
3/7/0/370f99d2a9073e7f.jpg
a/2/9/a29fb0d8bf206df3.jpg
5/5/5/555c0e73483872b0.jpg
b/d/9/bd90fd133af99575.jpg
2/5/7/2572af62ba12a967.jpg
2/d/e/2def2a590c9097af.jpg
3/f/b/3fb40da6013402d3.jpg
b/c/9/bc947ba6338f7947.jpg
8/9/3/893ea3b9c565dbb8.jpg
9/f/c/9fc0472c56aeab93.jpg
3/0/a/30a52febd5bca92e.jpg
9/9/f/99f83a207eadaae0.jpg
1/4/c/14c61398f307b596.jpg
b/7/0/b70b234ad156ca25.jpg
f/3/1/f316c756c45901e6.jpg
a/e/9/ae998ff70f68d130.jpg
d/a/5/da533682c61f9bfd.jpg
a/3/2/a320632986d3dd8f.jpg
4/2/0/4209f55a68a389db.jpg
9/c/d/9cd242180d7780fb.jpg
0/3/f/03f926f668e6eba1.jpg
a/e/a/aea1ba9988ce61b7.jpg
1/e/9/1e9587855d24071e.jpg
a/0/a/a0a783cbc41cc5b6.jpg
6/f/2/6f27a6c50ad00034.jpg
6/7/a/67aee1baf58d6ff3.jpg
f/8/e/f8e4471698e8a84f.jpg
4/c/3/4c3daa097a679c4d.jpg
d/7/5/d753ad86642a6873.jpg
7/e/2/7e2053db22d3fd6e.jpg
c/1/5/c15f9837eb63fd18.jpg
5/1/0/5104b0623c04ebb7.jpg
5/7/9/5799a9c09f9fa063.jpg
c/4/9/c49a2acdabf30b34.jpg
a/9/8/a98c57f3ace9bb53.jpg
4/b/5/4b54d2356237a110.jpg
a/d/b/adbfda1fc1b6c3f4.jpg
b/9/9/b99ea691b174fcc7.jpg
d/d/e/dde3273f8fd1d5c5.jpg
0/6/7/0672cbc0078e530b.jpg
2/d/8/2d82f8f82251158f.jpg
d/e/7/de7f37dd188f8eca.jpg
b/3/9/b398e9f0e86e8d1e.jpg
1/a/1/1a1e53119ff1f0d3.jpg
b/7/9/b79db31684e4f503.jpg
1/8/e/18e6d3824f0ecabe.jpg
8/8/1/881b2bce9c55491f.jpg
6/0/b/60b89b450d673bc7.jpg
d/c/8/dc81a382fbe22c58.jpg
7/5/3/753b2cd71b278bf1.jpg
9/5/6/9563d7116b8bc014.jpg
0/0/c/00ccb9e605722c02.jpg
c/1/e/c1e7b194fd78c94a.jpg
5/7/e/57e6294a0786a69a.jpg
e/a/7/ea7ca75dc4785b76.jpg
9/9/b/99b2a21ebce614af.jpg
9/e/e/9ee822cc930c3e48.jpg
2/4/0/2403941f4a0f827b.jpg
6/e/d/6edfa666096b2d06.jpg
3/5/b/35b0725518bc8836.jpg
e/5/2/e523faf29f3da742.jpg
5/2/3/523ae3900bafa400.jpg
b/9/3/b93de65d6f1051ee.jpg
a/4/4/a4472b7034f05696.jpg
7/a/e/7ae1f7a9a1a93a12.jpg
3/5/c/35c27fc799dcc2d4.jpg
4/b/8/4b857e2900fab4d9.jpg
e/e/0/ee00052d2275f61c.jpg
8/5/6/8562cfdea0c01706.jpg
3/f/3/3f372685effc3aff.jpg
f/1/f/f1f04ea14b951f5a.jpg
f/d/6/fd63a35e1ec7d4c4.jpg
c/3/4/c341e771625db4c2.jpg
a/5/3/a53772d7661e11f6.jpg
6/1/7/61725d1792b9cf1a.jpg
f/e/7/fe7a435aca89480e.jpg
c/6/b/c6bb2a6c54a214d9.jpg
4/d/8/4d8ced7c22dc4ea3.jpg
6/2/b/62bad1f815a81659.jpg
5/e/c/5eca74ee6dbf8dcf.jpg
e/3/1/e3102b8dacb38344.jpg
a/6/9/a69d4fb92f956585.jpg
5/b/e/5be4945ccd53fa51.jpg
7/3/8/7380575b64d1e246.jpg
5/f/8/5f8760a227280f51.jpg
b/c/d/bcde96be3ea1b8d7.jpg
1/5/0/150ff9294264acbd.jpg
3/c/8/3c8f99eb6aa0eda1.jpg
a/f/2/af2550ce5847320e.jpg
d/1/d/d1df9763898d8365.jpg
f/9/5/f956da005b20063e.jpg
f/3/c/f3ca0ac0ff54bb22.jpg
2/9/f/29ffe8e65ea8eb1a.jpg
e/6/0/e606bb1bf463d2db.jpg
7/e/6/7e6c30d51558270c.jpg
d/7/4/d74aa123968785b9.jpg
3/6/5/3657b7b27efc7d37.jpg
f/d/a/fdaeca0b1e254c3f.jpg
c/c/a/ccae4fc9a0104994.jpg
8/b/6/8b62b75c3900ae22.jpg
9/9/7/997327b6d5f20e7f.jpg
d/f/a/dfa844c38ce9194d.jpg
2/7/3/273a5d69508b5454.jpg
3/f/a/3fa721291b5e0f55.jpg
2/d/3/2d32b5bb220a52b4.jpg
3/2/3/32353e49f992a1bb.jpg
4/9/d/49df6e4d044ece91.jpg
9/1/8/918251fae7eddc67.jpg
b/1/b/b1b3928cd583e9e2.jpg
9/5/3/953cf98e1b97514c.jpg
3/8/c/38cb327711a60acf.jpg
0/e/1/0e141a64d0079e3d.jpg
e/5/a/e5a8e29a73f85732.jpg
b/e/b/bebf11d53fb45dd5.jpg
9/a/0/9a06b34bcdfab3c4.jpg
1/b/4/1b4f1e7c20659559.jpg
d/e/8/de85545eb404d6a7.jpg
7/e/7/7e79fc829fd8dc6b.jpg
8/e/f/8ef83b0efa47598c.jpg
0/6/b/06b7e33f32df40df.jpg
f/d/8/fd8b7498e7d2b0ea.jpg
5/6/a/56a3bd30fb72c8a6.jpg
b/c/2/bc2596da34f7a2e6.jpg
0/a/d/0ad94f4d9592c680.jpg
5/6/a/56aa32b639bb67ae.jpg
c/d/5/cd59c7b9e4ddc16f.jpg
1/b/c/1bca8648fd9c081a.jpg
b/9/f/b9fb44444be25f28.jpg
1/0/2/10239ca6e0794c60.jpg
9/c/f/9cf58056c1ab94d0.jpg
6/a/e/6ae514c7b46f73c2.jpg
3/9/c/39c7e0b539804e6e.jpg
9/c/0/9c056939d3b3064a.jpg
7/8/3/783c5891f03fc057.jpg
2/c/8/2c89e251fbf8c5c0.jpg
5/d/e/5de3db5d72dc4544.jpg
5/3/8/53856d5329a7ff2d.jpg
d/2/2/d22b55492e34d756.jpg
9/3/9/93915a14b4b6356f.jpg
1/2/c/12cc3d20dede556a.jpg
2/1/c/21cfab229156976d.jpg
f/b/2/fb2b135347f7f287.jpg
b/4/b/b4b1c2348accf8f3.jpg
f/4/1/f414676193c4458d.jpg
2/7/1/271e7f7e1fc1f45e.jpg
9/b/9/9b9629e1544f6af2.jpg
1/9/e/19ec274244703097.jpg
d/d/5/dd544654c240d53b.jpg
9/9/c/99c67e9a19f29146.jpg
c/3/7/c377637d3eccef7c.jpg
6/7/d/67ddaf89baab3ab4.jpg
9/d/7/9d787edc380da144.jpg
d/b/1/db19df4b8d42c6e7.jpg
e/c/0/ec09d442c7ad710e.jpg
d/a/f/daf1bb36ae311b72.jpg
8/f/3/8f3b2118559ca66c.jpg
0/3/c/03cb19ef8496ef73.jpg
d/1/6/d168aaa3303f7164.jpg
8/0/9/80905bce0c5ea6c7.jpg
4/0/5/40506e9a5e3901cc.jpg
0/7/b/07ba8b01c5277f33.jpg
f/a/9/fa97f281d6bedf65.jpg
2/0/0/2004cc24bbe113b2.jpg
4/a/4/4a4a61f1a249cb53.jpg
8/f/8/8f8843a0a0c00173.jpg
3/7/4/37491262d7a063a7.jpg
5/8/b/58bd1e416ad2c60f.jpg
e/3/3/e33bdb306cf469af.jpg
7/3/b/73b9aa345641e4ce.jpg
5/f/5/5f5e3f5ad622a1db.jpg
a/a/5/aa5051d887d85c61.jpg
9/4/a/94a05cbb7eb81af8.jpg
d/a/f/daf38fb7ed9f64cc.jpg
e/3/f/e3fd621a5ac0527c.jpg
7/1/b/71b7f848c7574f03.jpg
c/f/f/cfffab11138c1e17.jpg
e/3/5/e35ffd2a68c2d161.jpg
9/f/3/9f330e9a22315b33.jpg
9/2/0/920d03a676d443ab.jpg
c/7/0/c70d58632e65f82e.jpg
4/1/5/415820cff37d65d7.jpg
b/4/5/b45fa2f325ec3a4c.jpg
c/f/f/cff7bd362b712c71.jpg
8/2/4/824d17b1181230bd.jpg
2/2/f/22f682b9d877151c.jpg
5/9/5/5958b9aef50e8f30.jpg
4/e/9/4e9bf7179eb2ff58.jpg
6/6/2/6623e6cdcce460f2.jpg
7/4/e/74e3da84aeefa3e7.jpg
a/4/7/a47a1153605c8321.jpg
2/a/8/2a851a2216898362.jpg
0/5/1/051c035f1c0427a7.jpg
b/8/1/b817a7ba94fa736c.jpg
d/9/5/d95ee6efef4a2ca6.jpg
3/9/3/393f98693a1a3412.jpg
7/2/a/72a1425842939b0e.jpg
4/1/c/41c8977445c59997.jpg
3/8/4/3848617649443701.jpg
4/b/f/4bfb4d3fd6e8ccc6.jpg
0/f/0/0f02263ec9db0ba2.jpg
c/8/e/c8e3db40a93ecd5c.jpg
4/e/2/4e2b2b9fd333d195.jpg
8/9/e/89eb2489576ed78f.jpg
5/0/0/5009d116dcec9ba3.jpg
f/d/7/fd707e84b94ef036.jpg
f/4/e/f4e97d7b82d7a2f7.jpg
0/b/4/0b474a98e21097b5.jpg
7/1/c/71c7eef6b42ac1cd.jpg
e/5/6/e568c85e8cf40e70.jpg
0/e/e/0ee7f0d33e2c85ea.jpg
1/e/8/1e890fb91efb8b40.jpg
1/2/1/121ea301eefbe238.jpg
f/1/5/f154fec5849bf625.jpg
4/3/e/43ee482403d692f4.jpg
0/7/1/071b74589429fbcc.jpg
1/9/1/191a757bbdc5002c.jpg
a/2/e/a2e8c5e85bfbcaab.jpg
9/9/b/99b184b35a0eb9b6.jpg
4/c/7/4c7ba01e765bb258.jpg
7/8/0/7805cecb10683439.jpg
1/1/6/116c4b7cec374080.jpg
a/0/9/a090da9998c59951.jpg
e/b/b/ebbb89a9785e24f8.jpg
4/9/2/4920fb2b1ea608cc.jpg
a/1/0/a105d0057018b8d8.jpg
b/f/9/bf98ca806ca9aa9a.jpg
8/e/f/8ef6d58df8907bb4.jpg
5/0/4/504f0dd69fab44ac.jpg
1/f/e/1fef087e51b4f153.jpg
b/8/4/b848d746d6681a69.jpg
0/f/5/0f526c00ae6d8e8e.jpg
d/b/5/db5a6ebacd52242d.jpg
7/8/f/78fc672d8fd6bf15.jpg
f/5/3/f5387acd2a716e2a.jpg
5/c/b/5cbdf8cb4b1d0c2e.jpg
d/4/1/d41177b7e33393eb.jpg
1/9/d/19df478218a9ca3b.jpg
6/f/7/6f742622b27b6816.jpg
c/2/f/c2f61855cd36de83.jpg
4/6/5/465d76f5630f8a68.jpg
f/c/3/fc3af0ecb286ba35.jpg
1/f/1/1f1922f42f528ece.jpg
2/1/e/21ee79c31073e11e.jpg
0/f/c/0fce7d7fdebe8786.jpg
0/6/3/06392a9579afd428.jpg
a/6/e/a6eecac2c6a515e9.jpg
c/2/5/c25e845cee2dd02f.jpg
8/c/c/8cc3168b889d8a46.jpg
2/6/2/2623f66c2855d525.jpg
5/2/f/52f8c6ec0e6b8c32.jpg
8/7/e/87eea2f3a6a930e1.jpg
7/2/2/7223953a610cc8da.jpg
b/4/3/b43ba96aff25d793.jpg
c/7/9/c7955c923b6a9c3a.jpg
c/2/e/c2e23ea583be8580.jpg
6/d/e/6de50fe986a2ee0c.jpg
f/c/9/fc979bbadd84653b.jpg
6/3/f/63f926e1f3f3aa8e.jpg
f/1/a/f1a849457e555c06.jpg
3/d/1/3d1ee8d9f1a63b96.jpg
8/8/3/8839e6c3f65c7d08.jpg
3/e/3/3e3c82b303282f36.jpg
5/a/9/5a9503882d28b5b3.jpg
c/8/b/c8b4f585fede6503.jpg
3/d/2/3d27f34e6bb01125.jpg
e/6/c/e6c3f2d604054e40.jpg
e/c/c/ecc657fb519ec62a.jpg
0/1/9/0198d2dc505a7ad8.jpg
5/5/0/5500bf06145a76d0.jpg
5/2/2/522f966312b9799b.jpg
1/b/3/1b3ac758110d787b.jpg
a/f/2/af23f5045a6dbf3e.jpg
b/b/d/bbdff8c94da871a6.jpg
2/c/d/2cda2e30f0917e47.jpg
f/9/8/f98cde6980a81d71.jpg
0/2/b/02bdcad6d225bcb2.jpg
4/d/a/4daa35b0073acaaf.jpg
0/9/c/09c1fe7e4436f853.jpg
b/2/3/b23f9d500f3d9f0c.jpg
f/7/f/f7f254f00baffae8.jpg
e/5/3/e53f78747a42fee8.jpg
0/f/6/0f6a403231c148ad.jpg
e/a/7/ea76ceda7be1c8da.jpg
e/4/4/e4485baca1c10cc1.jpg
e/c/b/ecb26258d8294504.jpg
5/3/7/537aa68f4a340149.jpg
e/b/3/eb3a0efcddfb4870.jpg
8/7/0/8700fa2dbabdc376.jpg
e/9/f/e9f0626a6852b3ec.jpg
2/9/9/2996c833e038f296.jpg
7/4/8/74801054e9b0a5fb.jpg
5/8/e/58edbc468223e2d8.jpg
4/0/5/4050c7239d946f08.jpg
b/c/1/bc11a8d1aeb6eb2a.jpg
d/5/f/d5fd1fa87dc5dd14.jpg
8/7/8/878ed0b9666b0ed5.jpg
6/6/c/66c10e5a3b0a43ce.jpg
e/9/b/e9b551f99a461e50.jpg
2/e/0/2e011e59f68370a5.jpg
d/7/a/d7ae2592226cb395.jpg
4/c/7/4c7f42520e7be922.jpg
f/b/7/fb747dbfe65f61c6.jpg
c/a/4/ca49cd7eb2f5e4ce.jpg
e/1/5/e15d15d5f56c90b3.jpg
e/8/1/e8130f0a6b45f090.jpg
e/1/4/e14470d60e548fd5.jpg
0/6/4/06477fd053bcf256.jpg
e/e/6/ee6c32fa9fd9fc78.jpg
4/4/4/4446f254f7703bf4.jpg
9/e/b/9ebaef9829fc0cd2.jpg
6/1/9/61931c91ce87a463.jpg
d/c/8/dc813d6a502f8131.jpg
f/3/6/f361dadb76bd7084.jpg
7/3/1/7319da484de96cab.jpg
8/c/3/8c319f2308ead6b7.jpg
3/6/e/36ec7b37b4c112f5.jpg
2/0/a/20a280291346262e.jpg
9/0/a/90a764e7ec93a289.jpg
8/c/b/8cb3914659b0ebad.jpg
a/a/9/aa95d6221abacaec.jpg
6/d/7/6d7ef51ea8e25b26.jpg
8/e/5/8e5b50a57c3abfd1.jpg
1/0/0/100f6fe7a7de5523.jpg
a/5/1/a51819cae9c5ff1a.jpg
a/f/c/afcd208fb2edcbcd.jpg
d/5/3/d532c3e0bb04cc90.jpg
3/2/6/3264c544f3e5c4a2.jpg
b/a/e/bae848cf61991dcd.jpg
d/6/0/d60876df4a9d6f8b.jpg
0/a/d/0ad185ff978d8c9b.jpg
f/c/6/fc6f2556763ad16a.jpg
8/5/8/858afaeb23fc3367.jpg
e/4/7/e471269f05efa306.jpg
0/6/1/061a36142d791d4b.jpg
a/b/e/abe63557b878947a.jpg
0/c/8/0c8b6418b87accd8.jpg
8/0/f/80f1e6cd82424d16.jpg
1/0/a/10ae7e147b7fb322.jpg
a/b/5/ab53856d7ac68a88.jpg
c/4/b/c4b6c9426dc5b1aa.jpg
7/c/f/7cfa9f0b8e4f43ec.jpg
2/1/d/21d9aba23d425bd9.jpg
7/2/3/72357c8c8531aeb2.jpg
e/c/0/ec04ef807f9cd16c.jpg
9/c/5/9c5e177c4b8b820b.jpg
6/4/d/64d1e5acc393e402.jpg
e/0/e/e0ee8387c3e6957b.jpg
0/d/f/0dfc7a22498fd552.jpg
d/0/7/d0747adf07facf80.jpg
7/c/d/7cdbeaece0f74814.jpg
5/d/b/5db0a8769477dfd3.jpg
f/0/f/f0f2a14ffde151e6.jpg
d/c/c/dcce5c9b0c76eacd.jpg
5/7/d/57d07fecb1b75a88.jpg
2/1/5/215c38e3d727056e.jpg
1/e/f/1efb58f83e34c5a7.jpg
f/4/3/f432253b1f53f51d.jpg
b/c/0/bc0bf5343712f0f8.jpg
c/3/4/c341bd6170dd9bef.jpg
1/c/6/1c6150aa1165cf21.jpg
a/2/c/a2c3af575ddbe4b0.jpg
8/5/2/852883cedc27e6a0.jpg
0/c/4/0c4b1858a6b3c65c.jpg
9/b/f/9bfc68cff6075416.jpg
a/7/f/a7f2d3a02cf43df0.jpg
2/0/8/20893259814f2e1a.jpg
c/a/d/cad8f3941ec82115.jpg
4/5/6/456d7dbe8dc2c96c.jpg
1/0/8/108d30635d755c48.jpg
4/9/e/49e0618af3e00b36.jpg
4/b/b/4bb68be2c7606c85.jpg
3/0/e/30ee72ac5ad10ed7.jpg
e/9/0/e90079a3c7e187e4.jpg
3/8/f/38f88e6c2c05dad7.jpg
6/8/5/685b37192ba6d076.jpg
6/b/e/6be5be53aa0c54b4.jpg
6/1/9/6199b7cce1b70d12.jpg
9/2/4/9249f7c0a366f139.jpg
2/b/7/2b74dc4db974fe3f.jpg
1/1/8/1187fbc7db817280.jpg
3/9/c/39c96a818ee9a58a.jpg
b/f/4/bf46e980204390a3.jpg
6/c/3/6c3b57026e0b002d.jpg
3/c/f/3cf5f851bd74e7a4.jpg
f/0/8/f089e46abdfd288a.jpg
7/6/2/762b0fb02435c7e2.jpg
9/f/c/9fcfef3197047f33.jpg
2/2/b/22b29b9fb586b51d.jpg
e/6/c/e6c386cb23d5baa0.jpg
b/b/4/bb497d1d95bf5e73.jpg
4/5/7/45756a4e1b1a6bc8.jpg
b/c/6/bc613b32bd430263.jpg
6/d/9/6d9c13af0f81e6ef.jpg
a/a/b/aabbcd60a4049485.jpg
4/c/7/4c7f419843f94ee6.jpg
b/e/d/bed473610890dd74.jpg
0/8/f/08f3f3aec4ab5e53.jpg
9/3/4/9342c904bd1b1477.jpg
a/3/f/a3ff3c6ba0672ccb.jpg
4/9/b/49b3fe5662f3e9e6.jpg
4/4/1/44136472e0ec3d9b.jpg
a/a/8/aa8dde1f359e33aa.jpg
b/0/0/b00c43f6a2dab711.jpg
9/5/6/956ac76b25fa81b3.jpg
0/9/e/09ecd77ee94c0303.jpg
5/f/c/5fc8c612ad437c0f.jpg
d/c/3/dc3f83bfda8aab42.jpg
b/b/5/bb577e86177e6780.jpg
b/6/9/b698809e03553fb2.jpg
0/4/3/043b290072deeb8a.jpg
a/1/3/a1350b88f4be9256.jpg
7/e/b/7ebe742915d01a90.jpg
e/2/7/e2729f84a905212d.jpg
9/2/2/9227cef29c53f0cb.jpg
f/4/0/f4066287034619aa.jpg
a/5/e/a5ea50dc33854095.jpg
9/d/3/9d3950e85954fe49.jpg
b/b/0/bb082e77fccf1870.jpg
6/b/5/6b5af3c37607d826.jpg
2/c/1/2c1475cc35a1b425.jpg
0/b/b/0bb047159df2d1c6.jpg
d/6/d/d6df0bc314e7b17f.jpg
9/8/7/98759d4b72cc53dd.jpg
4/a/3/4a39905d25420f61.jpg
0/c/9/0c928253a9c0a47c.jpg
9/f/b/9fbd6e75ab921837.jpg
5/4/4/5442a6be5b4e16f6.jpg
0/a/e/0ae2c545e9cbf3b7.jpg
9/0/c/90c5f59f3d42dfc5.jpg
5/f/6/5f683025edd1c158.jpg
5/d/8/5d807423b4e79ff5.jpg
3/b/7/3b718606032a9e68.jpg
1/4/2/1420d9ee0bb56717.jpg
5/5/1/5512b63ea78d5709.jpg
4/2/e/42eeccfd2a78a437.jpg
a/1/e/a1ec408ee1a653b6.jpg
4/5/b/45b3aca4fae67e95.jpg
0/f/f/0ffef9da28ce4176.jpg
b/d/6/bd64707fecaebd0f.jpg
7/6/f/76f6d9e7fa42156f.jpg
7/7/9/779ac6541e3d2d01.jpg
a/a/4/aa4095783d2939da.jpg
5/6/6/5665aee677ed68a2.jpg
0/f/7/0f721e213710b383.jpg
6/f/d/6fdc41408a9792e6.jpg
d/0/7/d07fa036c4e805fd.jpg
2/7/3/273396145cb3412a.jpg
4/6/f/46fc6afa429d11b8.jpg
b/6/1/b615deb3b6af8c20.jpg
f/a/b/fab2a980a495d783.jpg
4/d/f/4df0882cc0cfa1a1.jpg
f/e/6/fe665e02c83beef0.jpg
c/a/c/cac2669de0af05e0.jpg
0/c/f/0cfa3e333fc8fc67.jpg
f/a/9/fa910d078309a36b.jpg
9/7/c/97c06c0e7e7206b5.jpg
8/e/b/8ebd9959c2d2408b.jpg
1/2/e/12e5fbb66e595415.jpg
d/e/7/de7fae95a1923382.jpg
0/c/1/0c109cd3ff32fd80.jpg
3/3/7/33799f843dffb4d2.jpg
9/b/a/9ba407f0a8920bf5.jpg
2/c/3/2c3287e1381610f2.jpg
8/0/8/8088bb5a60fe02ac.jpg
b/a/f/baf256742a51f0b7.jpg
5/6/e/56e6a4b2395d98d0.jpg
d/c/3/dc35bf5cee4d2ceb.jpg
b/d/a/bda86783b11b0b45.jpg
3/a/a/3aa8f1fc937a023c.jpg
0/4/7/047f3d1941f118fc.jpg
9/7/a/97aa0e8078503bad.jpg
2/d/6/2d61a128a60ba2d2.jpg
c/7/a/c7abe9f307b949fa.jpg
0/d/0/0d0713ef08020908.jpg
f/0/5/f0577353ae134e9a.jpg
2/e/0/2e0baf684dd5c67b.jpg
0/d/3/0d358cab57d705b5.jpg
f/8/9/f893706fd75c0114.jpg
e/6/f/e6ffbb0a1663c728.jpg
f/2/7/f273e3ff1b078b60.jpg
f/f/8/ff89cde3b013d2cd.jpg
b/6/2/b629fb450a8c85f4.jpg
0/8/c/08c1c185f418a966.jpg
8/8/b/88b1d4c2777926b1.jpg
5/c/c/5cc210d733066f59.jpg
f/8/8/f88e28f4ffc5775e.jpg
e/9/b/e9b0563e9f45ec70.jpg
d/5/1/d51e4f1e61731e26.jpg
b/4/3/b4356b0ec1a6a809.jpg
c/4/d/c4d4280b4f9ee30b.jpg
f/2/e/f2eb681c331a898c.jpg
c/5/7/c578e8b4a6f87c32.jpg
6/0/e/60edba41060fe4fe.jpg
5/e/5/5e5bf69cf47bb16a.jpg
5/f/f/5ff4a0e8b650934b.jpg
f/b/7/fb7ad16abb74d372.jpg
6/b/7/6b7d4271e5e1aca0.jpg
9/c/6/9c60a8bfc6f7bd96.jpg
a/1/d/a1da0ed8a3dc50dd.jpg
5/9/a/59a64b911f83bb19.jpg
0/b/3/0b36505470f51135.jpg
b/f/1/bf1569c1f604fb50.jpg
9/4/c/94c137a0e50413ab.jpg
4/7/5/4759f1967cb03ad6.jpg
f/3/e/f3e4a792e1fd360d.jpg
8/d/2/8d2e094b73c0fe86.jpg
0/d/2/0d24789637423c40.jpg
1/8/2/1820a0f461a5fa0e.jpg
e/6/e/e6e709c3c8bb6d2f.jpg
0/a/a/0aa52ce5e530cc7b.jpg
2/f/3/2f3ab570f7a66de8.jpg
c/3/9/c398fdb9a8c7e3d1.jpg
e/d/9/ed992067b619fb0a.jpg
4/f/5/4f54504727d9d515.jpg
6/2/0/620ccfbb56c1ee8b.jpg
c/b/a/cba1317aefbe21e3.jpg
3/f/8/3f814fb74bf69c65.jpg
2/1/2/2124c7577750809c.jpg
7/8/4/7840b850a79ca5af.jpg
7/5/5/755b86b52b1f7d95.jpg
1/a/7/1a718ba1089e0e21.jpg
8/9/3/893b57bda8505b56.jpg
a/b/9/ab9fb8075d9acaab.jpg
d/f/3/df338f4f5a1d0893.jpg
1/a/3/1a3ce2a5d5841909.jpg
9/a/8/9a826072a0f0ba16.jpg
9/b/c/9bcc835b7dc7d9ed.jpg
2/b/c/2bcc3886dd693a62.jpg
8/7/4/87470feb846c267a.jpg
b/2/e/b2e93d66a8008927.jpg
1/4/5/145a76382b3a45cd.jpg
2/5/f/25f6d35bdb89ccf4.jpg
3/8/3/38329acb28f3e237.jpg
3/0/d/30d1d3c0336a42b3.jpg
c/1/3/c13301806ccad36a.jpg
c/3/c/c3c45afacd4c09ca.jpg
f/e/0/fe02695c9b4ac992.jpg
7/6/8/768d2a5897ee76a6.jpg
8/4/5/845669937bb67dc0.jpg
3/1/3/31365acc734a0c30.jpg
f/e/5/fe52912c7ed90911.jpg
4/2/5/425d0edcf594594e.jpg
a/2/e/a2e05048f93644bd.jpg
e/9/5/e95afe09eac7be71.jpg
a/4/6/a4671dcee0412267.jpg
f/7/2/f722569b43690b84.jpg
f/d/d/fdda8cac827a940a.jpg
7/4/b/74ba7758e931d2ea.jpg
0/1/9/019a41eb5a6ceea1.jpg
7/5/4/754dfc6a9b7702ac.jpg
f/5/5/f55e519449c8628a.jpg
e/b/7/eb725e6db9c15226.jpg
3/f/0/3f067e44e72ef128.jpg
b/4/9/b499c8038e143e59.jpg
7/3/1/731ca5ceeef18739.jpg
e/4/4/e4493bffca284333.jpg
b/9/a/b9a270c250467b91.jpg
5/5/3/553b55fa4ac53055.jpg
9/2/3/9239a9ce4f4a8208.jpg
e/3/7/e373ed93cdbe743f.jpg
1/c/5/1c54b6d0737f9528.jpg
b/3/5/b35461a23a77d5ff.jpg
1/b/c/1bcef7d29ed58842.jpg
d/8/b/d8bcd9f8ad7d11d1.jpg
6/e/1/6e1bb0428fb9bc7f.jpg
8/a/6/8a6261bba8fc74f3.jpg
b/a/f/baf0f7e88aa19789.jpg
1/6/b/16b3b56882635daf.jpg
8/1/4/8145194365f928d6.jpg
a/5/c/a5c71b2fa1c10420.jpg
1/4/b/14b168a32c1565a1.jpg
7/5/0/7507d80d394d0e59.jpg
0/c/e/0cece18499d82128.jpg
1/7/d/17d3ec487a788a60.jpg
c/f/7/cf7c07299fda2424.jpg
1/0/3/103bc735d825dc83.jpg
6/8/9/689cecb687df27d0.jpg
8/f/1/8f1b2e46e72954e6.jpg
d/8/d/d8d347999e7176f3.jpg
8/0/0/800c39d10931d6ca.jpg
2/3/1/2316de4a7c2f0a76.jpg
4/6/b/46b0962c311595e3.jpg
9/b/b/9bb9815564391fd5.jpg
f/2/b/f2b7f862dfad7c49.jpg
a/5/9/a5962ec703363739.jpg
e/a/9/ea9518fb23489006.jpg
a/d/5/ad53a91bef98d965.jpg
2/c/5/2c56babfd9b1d363.jpg
b/5/f/b5fb373f83a56b7a.jpg
b/f/a/bfa8c7026d03df05.jpg
5/e/1/5e1dca804b166b9f.jpg
5/7/d/57db9a1a568c02f4.jpg
4/c/4/4c4d30d654cc7012.jpg
a/0/d/a0d09b9a2b9bbdc9.jpg
7/1/b/71b32ca6f8957586.jpg
f/1/3/f13bae5c096c1565.jpg
1/7/3/173edcef7f80ddf9.jpg
3/1/3/3131ec7ebc67ffeb.jpg
7/4/4/744c6b8d6ac91fe6.jpg
7/b/5/7b56e6791b11682b.jpg
4/1/3/41399665ce06f22a.jpg
8/e/7/8e70c4793001f6da.jpg
e/2/e/e2e4b8befbad0e42.jpg
0/7/6/076834446b7b0a43.jpg
d/5/f/d5fd355ae0472490.jpg
2/3/6/236b9e1beb7242c5.jpg
c/c/6/cc60396258493fcd.jpg
1/1/e/11e5982a6997855b.jpg
0/e/b/0ebb13a82e966b0b.jpg
d/d/d/ddd8657988626b02.jpg
d/a/7/da76b19cfce3ecc9.jpg
7/b/f/7bf4b811440bed5d.jpg
e/8/3/e8322be174e3867d.jpg
3/c/d/3cdea49fe7b87fa7.jpg
e/5/f/e5f72f17ff7a8765.jpg
c/4/7/c47fbf9efb26bf21.jpg
e/7/d/e7dbfddea3552783.jpg
6/0/4/60412ef0faae1710.jpg
8/5/3/85338540ccf2a99b.jpg
7/7/2/772fab61d9763987.jpg
7/8/c/78c4576597b1e921.jpg
f/1/b/f1bc8fcc8c8ea562.jpg
d/e/9/de964b78a3cdf834.jpg
5/a/6/5a657881709ad807.jpg
2/f/c/2fc9c114f86c4a44.jpg
2/5/9/2599af92aa27f3cd.jpg
f/c/3/fc3e5d6bebe70029.jpg
9/4/6/94664b0967308de2.jpg
5/2/b/52b354be40438930.jpg
7/0/1/701b6bdab45fbdeb.jpg
d/3/c/d3c07eebe5dd456b.jpg
c/c/4/cc43d1a33236239a.jpg
3/9/6/3961edaae47609da.jpg
4/2/2/422a5be54f3fc0d3.jpg
d/3/a/d3a7dda8fdd4172f.jpg
e/a/9/ea99adb2681d63d0.jpg
d/5/4/d540c28f7782140b.jpg
7/0/b/70ba4039a4323a7f.jpg
7/7/e/77e22124726b86e0.jpg
e/1/a/e1af41e90920e659.jpg
b/5/9/b5908787594624ed.jpg
0/4/d/04d979fa03214ad6.jpg
b/4/f/b4f9fa56f393b290.jpg
8/0/7/807f3e30f31761a1.jpg
f/f/7/ff73f52e3f278bbf.jpg
c/b/5/cb5141a3f485f4ce.jpg
f/e/a/fea1e7b78b36d92c.jpg
a/6/e/a6e7ebdab60a4433.jpg
e/9/5/e95132efb2e79ece.jpg
c/d/e/cdea969aee411c31.jpg
b/f/0/bf0ad360481fba68.jpg
8/9/b/89b2e55ee31659e9.jpg
1/f/6/1f6962dcf71c1f29.jpg
2/a/7/2a73ad89f5c3f798.jpg
8/8/1/881232e742ff0f09.jpg
6/4/b/64b27b2189fd38d1.jpg
2/7/e/27e88fde1338d5cb.jpg
d/b/b/dbbe029b180107e3.jpg
a/1/9/a1961f8825364599.jpg
0/f/1/0f1b57ee2f9e82d1.jpg
b/c/b/bcbb320016668a82.jpg
9/7/e/97e0307a5cc4507f.jpg
d/5/b/d5b9bea2295751bf.jpg
c/e/f/cef9d72379145912.jpg
a/3/b/a3bd5038865ad09d.jpg
2/5/7/257763cf4343133c.jpg
6/8/4/6841f1a840262aef.jpg
c/b/f/cbf6f93a8e285b36.jpg
1/b/5/1b58d16d0329dd15.jpg
6/7/0/670035f06fde47fd.jpg
d/a/3/da346e4a5ae77e0f.jpg
a/d/b/adb67b3d64fcfc1e.jpg
e/c/a/ecaf6c45f2633ef0.jpg
0/c/d/0cd0816e7af49f31.jpg
c/c/d/ccd0d2c94bab0fef.jpg
0/a/f/0af2719855999bb4.jpg
3/6/4/3643270a123f9a78.jpg
0/b/9/0b95cf1dc1b9bb5f.jpg
5/1/c/51c16511e181c7ee.jpg
b/6/c/b6cdb73ea55fcd5c.jpg
5/c/a/5cae33bfc639a300.jpg
4/d/f/4df9b680939c8aea.jpg
a/4/8/a48bda620a0a9145.jpg
a/d/0/ad07df441fdf1c18.jpg
3/7/0/37073baf37befb06.jpg
7/c/8/7c8516f6b9003f58.jpg
e/3/f/e3ff68db37497516.jpg
8/3/3/8336a5dcee7e67b3.jpg
5/1/9/519c7a6ec7f8b4f0.jpg
f/b/b/fbb05a184cc3e07d.jpg
b/d/9/bd98c11603e49a63.jpg
a/e/0/ae0299a04e9b8d40.jpg
0/3/5/035fdc5faade956b.jpg
b/9/8/b986cf0020ecc0e2.jpg
6/d/8/6d8a2ae2a7df568e.jpg
4/f/c/4fcc3196dde16a69.jpg
3/4/7/347e80320bc12dba.jpg
b/9/0/b90e2dfc2f6196ef.jpg
6/4/5/6450e83466ca1fdf.jpg
6/c/1/6c1abcd7d00e038d.jpg
8/d/1/8d183a93d1ae4f96.jpg
9/3/5/9356b611bcd22109.jpg
e/d/8/ed8c03f71fa78a05.jpg
6/a/1/6a145683fcee0f11.jpg
9/6/2/9621747f53112b04.jpg
a/f/9/af9ce99009246b4b.jpg
9/d/7/9d74d4fcd8750d6b.jpg
b/c/7/bc7305938d980544.jpg
3/3/f/33f2dac8a2045426.jpg
d/8/5/d8539e511e207a1f.jpg
6/1/b/61bf4bb158d71172.jpg
8/5/2/85200cd82acd60bd.jpg
0/4/8/048008c1810ac275.jpg
c/7/e/c7e2e4ed69c87017.jpg
0/6/9/06961fbbfe32f5d4.jpg
0/a/9/0a9700989416da77.jpg
5/2/3/523044640384d302.jpg
7/c/0/7c0b0892e6d6491f.jpg
f/e/0/fe0c30f893a00de6.jpg
a/b/3/ab363f5b44269a8d.jpg
3/3/1/3317d0648a75a37c.jpg
b/a/9/ba96f6bd8100fb55.jpg
5/c/e/5ce0360a2a0014cf.jpg
c/f/8/cf8b654f0eddce06.jpg
e/0/e/e0e8dea30ab242bc.jpg
0/4/2/042f68acd81dd725.jpg
2/1/f/21f819ecd050246f.jpg
5/0/b/50bae32f04fa4823.jpg
2/9/e/29e210209bddef66.jpg
1/b/e/1becc2894eef9879.jpg
6/c/3/6c360e449df35188.jpg
7/6/7/76723a7d57e6530d.jpg
2/f/3/2f3213b776f5c154.jpg
8/9/e/89e0847ef49ae9ea.jpg
0/a/d/0ad1fa210409c796.jpg
8/9/e/89ec4eac30be0803.jpg
1/f/2/1f242e09c702b851.jpg
c/6/d/c6dbbe9996d69ea9.jpg
e/4/7/e47bad0eba49f073.jpg
1/6/f/16fb15bc31f94597.jpg
e/6/d/e6d529aeda5987c1.jpg
d/d/e/dde29b03583a98fc.jpg
d/3/1/d3111378ba8b13b6.jpg
8/1/0/810a601309c081bc.jpg
7/e/5/7e55377c2236f955.jpg
1/4/b/14be83400f81eb67.jpg
4/8/8/488b34a7bc4b5df7.jpg
1/c/7/1c707d9d609688f6.jpg
2/d/a/2dadbedfd8d7c7b6.jpg
5/7/f/57ffe78b926df1c8.jpg
3/b/8/3b8665d021c19187.jpg
4/3/5/435ec29dccd8041b.jpg
0/b/a/0ba69b825231476f.jpg
1/c/4/1c4058878c5c459c.jpg
c/1/a/c1aac4940e491a00.jpg
a/0/6/a06ea87c94965241.jpg
2/9/0/29033ddf1f28d629.jpg
0/e/3/0e354ad4d6bbd0d7.jpg
e/c/2/ec2f432c4ffa1474.jpg
a/a/f/aaf64ce78d9f8f9f.jpg
e/7/9/e79a2099be5b157c.jpg
4/c/0/4c0aa168e3adc210.jpg
1/4/5/145d3b40ef28f53d.jpg
4/1/3/41371672222013bc.jpg
1/c/f/1cf576991cde9b1d.jpg
c/4/e/c4ea755a032af5c6.jpg
3/b/c/3bcdcd0bc8ed342e.jpg
2/5/e/25e4e4a2cebfc3f4.jpg
8/3/a/83ac9367134ef848.jpg
f/8/7/f87283503275f741.jpg
7/3/3/7333d98bc1af8859.jpg
7/3/d/73db39a5bfc9694c.jpg
9/b/9/9b9ff3714d5d4175.jpg
6/2/e/62e42158f3946048.jpg
9/6/e/96eacefd1d1d4af0.jpg
3/2/2/322f6daab9b6e3ad.jpg
7/b/9/7b9629a729ffadc4.jpg
f/2/d/f2d498c28c163af4.jpg
8/d/2/8d2f81029a5d5ade.jpg
f/0/4/f04d6ff16f0c9165.jpg
d/6/3/d633474ddfabcfa5.jpg
c/7/7/c77220ebb8346c8b.jpg
0/f/5/0f5c7f35b844a3c3.jpg
d/a/d/dadce083dfa9ca92.jpg
5/6/6/566f082662e3204f.jpg
3/9/7/397961e55064f10b.jpg
b/e/8/be8f54d503c420f8.jpg
8/0/7/80764de7d3662c51.jpg
b/e/1/be1316d6fe3117a4.jpg
2/b/b/2bb5a138e725f544.jpg
5/0/9/5096911a0021ae42.jpg
2/f/b/2fb73fa2ea2f0a8c.jpg
c/8/f/c8fb90edf0634bee.jpg
2/3/a/23afed496fc3d486.jpg
d/c/6/dc6f5d8787aab323.jpg
1/6/f/16f6f1f4c8155927.jpg
5/d/8/5d8f795e444a13fd.jpg
b/4/5/b452cf77b99fa7f2.jpg
9/7/8/978a0c5a40f9610a.jpg
9/4/4/94465380ec9395cd.jpg
4/0/f/40f01eac21bb15b7.jpg
d/b/4/db4368186174b9e3.jpg
c/6/6/c669a0c341d6158c.jpg
a/5/1/a51f28174d09271e.jpg
2/6/6/26665973509de528.jpg
5/c/2/5c28a18c6fc02c1d.jpg
7/d/2/7d2ba0ca0ef1b171.jpg
f/2/3/f234dad84343b49f.jpg
e/f/c/efc5dcce7fa29ff8.jpg
6/6/5/66505ca5e438bd6f.jpg
d/b/9/db921dca147936ac.jpg
3/9/8/398e408a75cad5da.jpg
a/d/a/adadeb91dab17af3.jpg
a/a/3/aa320fa4d90c6cd1.jpg
8/1/6/8169d70551dba5ac.jpg
5/3/7/5370114d1d0d254f.jpg
7/4/b/74b42ce542eff677.jpg
e/7/a/e7a2ed2495b861ca.jpg
6/0/7/607772aebdfb35a5.jpg
3/8/3/383bb74e47177d5a.jpg
c/3/b/c3b2cfb8f1ee7c4a.jpg
4/5/c/45cb3dd2ef1a9558.jpg
9/1/4/91411effc66f286c.jpg
4/7/4/474126bfe002ab5e.jpg
5/5/c/55c62e09dd72dbb0.jpg
3/7/e/37e931af79fdeea4.jpg
b/e/2/be228d210b828323.jpg
6/5/b/65ba2b94afa41521.jpg
f/9/6/f960f5d9f129e365.jpg
1/6/7/1674d4fff23300a5.jpg
1/8/f/18f9818871e68fa1.jpg
a/f/0/af07d6ecad1525c0.jpg
1/b/5/1b5b5aa76fc3c01a.jpg
f/4/e/f4e1bf619d7637b4.jpg
6/1/2/61276859dd81f4a8.jpg
d/a/4/da4ac05d0823934a.jpg
a/5/f/a5fa47cee40dcb0d.jpg
7/6/d/76d1310d6826f78e.jpg
4/4/f/44fc1c98a4c9d0d5.jpg
8/6/5/865bd4a59ca7c602.jpg
0/7/0/07075b5af78ef538.jpg
1/8/a/18a1396b3e5a4f27.jpg
b/b/2/bb2df82561b53630.jpg
f/7/3/f73169427eb40917.jpg
2/f/c/2fca305a6dd66d8e.jpg
7/e/8/7e82ba4d83f6aa9f.jpg
8/4/5/845d0bab1948cb74.jpg
7/8/3/783070ba3c19d89b.jpg
e/8/a/e8affa9a8d51fd4e.jpg
f/8/f/f8f0a423e326b5fb.jpg
e/a/7/ea7680e9bab69650.jpg
6/8/e/68efc05dffba8fab.jpg
4/f/2/4f2953cf105bcf8a.jpg
7/9/4/7940835cfba2186f.jpg
a/e/c/aec66421ef71a606.jpg
b/c/3/bc3ce06b0b41b561.jpg
e/8/7/e879d9512cb067b3.jpg
c/0/7/c07e9a2328820bd1.jpg
6/2/1/621379a2ea9a3154.jpg
e/1/6/e163cd7aa342f94c.jpg
c/c/e/ccede620a4777efc.jpg
3/d/d/3dddd5c706338a73.jpg
8/9/7/8976a85fd09886d3.jpg
7/1/3/713d498cb819efeb.jpg
4/5/a/45a3cbe8a1227393.jpg
0/e/7/0e7a04280795f7bc.jpg
7/7/e/77ee4b402a4c5a3c.jpg
c/b/7/cb75c9d52b94746c.jpg
8/7/a/87a335212fa7c45a.jpg
9/5/0/95018d4c28a7ea75.jpg
d/3/6/d36e1ceaf6b84902.jpg
a/e/b/aeb57ae3492478b3.jpg
5/1/b/51bb1e3b6ba0c1ea.jpg
e/4/3/e43b7f7998a89048.jpg
0/e/b/0eba4e1b8c111b33.jpg
8/1/1/811e48efc278906b.jpg
2/8/1/281648601e0939ed.jpg
2/5/3/2536e5e939d00903.jpg
f/9/2/f928fc9f5a85dcc0.jpg
1/6/6/166392accb47eddc.jpg
8/6/b/86b16005a90e80ea.jpg
4/a/f/4af6e09b2bae5ec8.jpg
c/a/b/cab36e839b9b81fd.jpg
d/3/e/d3e8ef0339c56521.jpg
6/9/e/69e86e3afc901b44.jpg
d/f/f/dffc4365a1f9cc97.jpg
d/a/d/dadf8a332e8398e7.jpg
c/d/9/cd93bd00f442a14e.jpg
9/1/5/9155daa0d2202dd7.jpg
9/a/8/9a8d514e1401b25c.jpg
6/b/6/6b6fcbd6812a4d4b.jpg
9/0/f/90fb545693c56ab3.jpg
2/9/e/29e0c1770cb51f88.jpg
f/e/e/fee97650eb92a0f7.jpg
2/f/d/2fd1416af1b4f2ce.jpg
6/5/1/651bb3e484db12c9.jpg
7/9/e/79eabd4c3048dd72.jpg
7/f/7/7f74fb9e4b028644.jpg
0/2/0/02018094b5f7492d.jpg
9/6/6/96637ce22a335854.jpg
0/5/a/05a482f6f8ec2f41.jpg
7/3/5/735ff2f9d16f378f.jpg
b/e/f/bef8491a3a2cc85d.jpg
6/c/e/6ce078afd8e8e15e.jpg
9/9/b/99b8238df2becc62.jpg
0/b/8/0b81fc72ec8a9a54.jpg
d/f/a/dfa1233308c57f49.jpg
4/2/8/42867f86f3c85c76.jpg
d/1/d/d1d2cad28ded4e16.jpg
9/c/8/9c8c516b6f13ae19.jpg
9/6/3/963f87a8a3f5ceb0.jpg
c/2/4/c24010ba466d7f09.jpg
7/6/2/7626c37ee02efd40.jpg
8/b/3/8b34b4c92975a07b.jpg
4/e/3/4e387e14e3fbe910.jpg
d/e/b/deb9932b4e45b75f.jpg
d/4/0/d40d0891d21de588.jpg
e/c/7/ec735ae1a1497b57.jpg
b/e/6/be6d59fdcdc0beec.jpg
6/1/c/61cbce23bbaab131.jpg
2/d/a/2dad72d644015c49.jpg
3/1/f/31f25ca35165c975.jpg
0/7/a/07ad0eecbefed7c5.jpg
3/f/0/3f0d7735b77e4ef0.jpg
6/2/7/62794b4445d7f1bc.jpg
6/f/4/6f430b32f0845b63.jpg
f/c/f/fcfbcacb31dabf50.jpg
7/a/7/7a73a123971559b7.jpg
0/9/d/09d9e9acb6689f8a.jpg
f/8/6/f86e8a73731f8b8e.jpg
c/b/1/cb16fb8d13d81ef0.jpg
f/b/8/fb8233cbe807001a.jpg
b/c/2/bc2eddaecce882a8.jpg
f/1/3/f13256ad4197b4ac.jpg
3/e/6/3e6714934f89e326.jpg
8/7/9/8794ccd020cbf078.jpg
3/9/2/3927052464f99a85.jpg
f/f/2/ff2ec39898a651bc.jpg
2/7/3/273a63aa7c4f177c.jpg
f/6/7/f67871d407747a50.jpg
9/e/1/9e117d737341b642.jpg
d/9/3/d93874fe0cf39c7d.jpg
1/5/d/15dd9d4739f992dd.jpg
4/3/9/439be0ea619f7208.jpg
7/f/e/7fe01a11ceb9d37e.jpg
0/c/3/0c35f26bebe30bee.jpg
1/5/3/1537aa0d2023fbcf.jpg
0/5/d/05d906dbab6a4826.jpg
3/4/1/3419a5f0cfb54e35.jpg
2/9/a/29adb837f6dc92ca.jpg
5/1/c/51ca8132bbe42af8.jpg
7/3/d/73dcc157a8bc9094.jpg
e/c/2/ec2d193e63c6d549.jpg
7/3/1/73189734198d5d67.jpg
1/a/1/1a16860f26eba1d9.jpg
7/f/e/7fe0d60fcc5644d7.jpg
4/0/9/409a62c6048cdb9f.jpg
a/9/b/a9b31b261b149d7f.jpg
f/0/8/f087e82e4c88ccb0.jpg
2/8/c/28ce1b7fd5ec8e1e.jpg
5/2/a/52ac5040369fc460.jpg
2/8/2/28267d88d4d9ea30.jpg
d/d/7/dd7e7efdace99087.jpg
c/6/7/c671c4809a90ee0e.jpg
8/6/4/86463b5e23adde46.jpg
e/7/5/e75cc529d7dc7506.jpg
1/f/4/1f4e8ab1f1b2321c.jpg
0/1/9/0193b65bb58d2c77.jpg
e/a/2/ea2537ff6259b15b.jpg
8/9/9/899f66ffe9ba3559.jpg
9/0/4/904efd09f3536f0e.jpg
b/8/8/b88fc57ed9ee91c8.jpg
1/a/3/1a30a51a287ecf69.jpg
5/f/8/5f849ade1b4fbcb5.jpg
a/8/3/a83f150c65ab52fd.jpg
2/9/4/294c5690ad39a48e.jpg
8/2/6/826429c3d718ae75.jpg
7/f/7/7f7788574c527a7e.jpg
a/8/4/a84e19056c512574.jpg
4/c/2/4c268220038f21ae.jpg
b/d/b/bdbad726567a9245.jpg
b/a/7/ba755d65ebc9cca2.jpg
f/e/5/fe5a2b95dbd165f3.jpg
7/b/2/7b2eb2ff1cd06b11.jpg
2/c/3/2c323ce60bb64afd.jpg
1/2/9/129719c251314ab1.jpg
c/3/8/c388e3a7db16a653.jpg
a/4/e/a4ef7c4f7f6b3312.jpg
9/6/c/96c23572ba8c3993.jpg
0/8/d/08d272104d0aa87c.jpg
e/8/3/e835d9014de56e00.jpg
1/a/9/1a909812d15d3ecc.jpg
7/6/a/76ae75926cb57345.jpg
1/d/a/1da0673ffebeafba.jpg
8/7/0/87056f40a7b0230b.jpg
d/2/e/d2e3f486dff7f474.jpg
4/1/e/41e03b92a7e909dd.jpg
6/2/0/6209f29b3cd70b81.jpg
a/f/a/afa12191867054a4.jpg
5/b/8/5b86d6ad7ee86d88.jpg
2/d/1/2d15aadacb93fddd.jpg
c/8/4/c844fc9e577bd9ca.jpg
0/9/9/0994b22b5bdf7f29.jpg
d/9/6/d9610bad16c2ab87.jpg
c/4/0/c409a24a210c04b2.jpg
d/3/8/d38313ef40173aec.jpg
c/7/d/c7d5743a49dbe10e.jpg
0/7/9/0798ddfbfaebfe27.jpg
b/a/7/ba759c27eb68a843.jpg
4/3/2/432af092bde8fb36.jpg
7/e/f/7efe192bfda37713.jpg
9/b/4/9b41adbc95fe6b63.jpg
6/a/2/6a2d0a3d4468c021.jpg
7/3/a/73a5070730db691c.jpg
c/9/1/c91867c83a261e5c.jpg
1/a/f/1af38c2af12f3cad.jpg
a/2/d/a2d86a10c445ee02.jpg
9/8/a/98a6fe35c9ae907d.jpg
2/6/7/267144c4f40729e2.jpg
b/a/8/ba809c25feb85dbf.jpg
1/1/c/11c544991d546ca6.jpg
3/a/f/3afa666240b5dab7.jpg
9/4/b/94b734259daed5c9.jpg
7/6/2/762119d591e744e8.jpg
a/d/d/addd79d8af51ed28.jpg
b/0/0/b00a7239573919c8.jpg
d/7/5/d753a273bfd4409f.jpg
d/b/b/dbb7d03982f0df43.jpg
1/f/3/1f37ef0e56d35535.jpg
b/0/4/b04840567924c3ba.jpg
6/1/a/61a8407b32b8fc72.jpg
c/f/1/cf1a91583c188066.jpg
4/5/5/455810f0ed93c7f8.jpg
9/0/7/9073d8306d56a527.jpg
b/9/b/b9b1e375b63375ec.jpg
1/4/f/14f45e3809cf5b55.jpg
f/9/5/f95236871d2e2bea.jpg
0/7/0/0706c44d6b17c548.jpg
9/7/3/97336fae4f0c6482.jpg
9/c/d/9cd26e3c2e49f20a.jpg
0/0/3/003b275a36b07932.jpg
9/4/9/949ac1a3d017e28a.jpg
3/f/1/3f18f4a44e59c045.jpg
1/a/8/1a844c9e620d113d.jpg
0/6/3/063190db7306b993.jpg
1/6/9/169f0d9d3669f6a4.jpg
2/b/4/2b4c0b31418aa9ac.jpg
4/c/6/4c6857961017509f.jpg
6/a/b/6ab6a6c9a55d1f5c.jpg
c/6/1/c617e50ce83706d1.jpg
0/0/7/007262ffe1fe5149.jpg
2/d/8/2d81f4efdd995294.jpg
2/5/b/25b207aa4a62ee03.jpg
2/2/0/220b9d8063999442.jpg
7/1/1/7115df2d272e45c0.jpg
a/5/f/a5f394bbd137e60a.jpg
5/6/f/56f8d1ab49e9911b.jpg
3/e/f/3efd7807c2c6eefd.jpg
c/e/d/ced22f390438e31f.jpg
e/5/b/e5b3b7b73981d8ed.jpg
3/4/4/344fa0ab4eb99c04.jpg
8/f/b/8fb1021c425c5f61.jpg
2/1/5/21555445bec5913d.jpg
5/1/c/51c43c6d1460a4c5.jpg
4/e/c/4ec23acb1192c26b.jpg
b/4/1/b4137614662d3421.jpg
2/3/8/23846b8a2b38ed2e.jpg
7/4/b/74b07d16ec362c82.jpg
5/a/3/5a34e941328a4ac6.jpg
4/e/9/4e908447f7ee332f.jpg
b/7/2/b72969373e54a9d1.jpg
1/7/9/179d3b48af2bd7df.jpg
c/0/b/c0b91b1d630e6945.jpg
b/1/b/b1b4d8adb836dca1.jpg
1/5/a/15ae919142dccfcf.jpg
d/1/0/d10fe65e85a68481.jpg
2/3/c/23c2b2cd2bb97ac5.jpg
f/6/4/f641459874785dad.jpg
7/e/2/7e2802f73c4fc300.jpg
6/5/4/654b96e87d832d57.jpg
8/4/5/845c5d274d49d286.jpg
8/9/c/89c8dcf009ffdfd3.jpg
b/7/1/b7132fe0f8fc6ca7.jpg
6/d/f/6df1903b97a6595c.jpg
a/3/3/a33b8b80c3952e8e.jpg
d/b/8/db82213e3c9fbe13.jpg
d/6/4/d64420ceaea1c5e4.jpg
c/7/3/c734cca8c503efbc.jpg
6/a/7/6a74de0732070750.jpg
3/9/0/390db9f485f944d8.jpg
7/8/e/78e316480e677e58.jpg
8/e/b/8eb6c88b9acd9ec2.jpg
d/2/a/d2a412527be44742.jpg
7/6/7/767f35924baee118.jpg
4/1/c/41c49f51db0977b8.jpg
a/c/b/acbc6c4ccaa0a8cb.jpg
5/e/d/5ed113b0bcd21fba.jpg
2/8/f/28f7d46ba1eb7d26.jpg
c/1/4/c143db640cd9a4f2.jpg
7/b/5/7b5eea3dd63fa72c.jpg
9/f/d/9fd7424caefeb3b4.jpg
e/d/3/ed38134bcdda2f65.jpg
a/e/b/aeb5e1dde1774047.jpg
e/5/c/e5c46497bee04011.jpg
0/d/b/0db7275ebe8b5484.jpg
9/7/1/971481970492c298.jpg
6/b/b/6bb29d6b000cdaaa.jpg
8/d/f/8df4e3e12cde806b.jpg
b/b/f/bbf1d21c3509bfc0.jpg
2/9/f/29f74bd1fe88ba37.jpg
d/4/8/d48b0d133ffaa22e.jpg
1/6/a/16a10d03855f8295.jpg
8/1/8/818f615dd0f8790c.jpg
2/1/e/21e056af6740875c.jpg
1/2/b/12b3985ef46ba414.jpg
7/c/f/7cf6a2b7e27d390f.jpg
d/1/b/d1b09ed0c1da7243.jpg
a/d/d/add3e2ba15d5e256.jpg
f/6/d/f6d5e5623f10c56a.jpg
1/2/b/12bcd8417a7276f5.jpg
e/a/3/ea3a8ff69a8d5a1d.jpg
2/4/8/2481fcc2bc1e7897.jpg
f/f/1/ff14607bf53cf812.jpg
f/1/d/f1d59c52e1caa25c.jpg
d/8/e/d8e0b5ebbf6d860d.jpg
3/2/9/329ac2dd512c8efc.jpg
2/5/8/258de0e3ab754c9d.jpg
c/9/e/c9e25ea389292ca3.jpg
c/e/f/cef2fbf774601a31.jpg
4/e/4/4e452b2a6f6f8838.jpg
5/4/a/54aa37a1add158d8.jpg
1/6/6/166febb3cf463afd.jpg
b/e/f/beff1f0ae583fb5a.jpg
8/5/e/85eac4732742d430.jpg
5/4/8/5482059de1d9a3e7.jpg
e/e/c/eec082d90f493e5a.jpg
9/6/5/965d268265fcb2c7.jpg
c/3/e/c3e4bec5250da81d.jpg
3/1/8/318bbdf1d0a20177.jpg
b/c/e/bcea697ed3517a52.jpg
c/b/8/cb8157af997d252d.jpg
6/6/c/66c75c91d6d30a98.jpg
7/f/9/7f962c465f1c4e2a.jpg
c/6/4/c64590380d5065bd.jpg
b/7/a/b7ae4ae9af160016.jpg
d/a/f/daf9db8f17c52382.jpg
f/d/4/fd4c91e620fd450e.jpg
9/0/8/9083908fc074e6d3.jpg
b/a/1/ba1557da8b050878.jpg
5/c/8/5c8afb4bf1601550.jpg
7/4/9/7498d6b6bfd17842.jpg
a/0/6/a06c6efdcd342a11.jpg
7/3/a/73ac0ded0dc79042.jpg
4/d/3/4d307bbd2b5c67be.jpg
b/c/f/bcf364d790736bb0.jpg
9/b/8/9b865229e9c53acd.jpg
2/8/e/28e3a8a79b65322d.jpg
b/4/f/b4fb505452266963.jpg
6/f/d/6fd13a60f1c0b12a.jpg
c/4/5/c451ad06c96b8ce7.jpg
7/3/5/7358fa318c47e06d.jpg
2/f/4/2f4e7f06dfea7bdb.jpg
e/e/8/ee85d6ae73593dfa.jpg
4/3/1/431e65ae937bd738.jpg
0/a/8/0a8542bd8c968a01.jpg
7/5/3/7534777373ab36df.jpg
7/5/4/754d4db3eb177066.jpg
a/e/7/ae748d61e997f146.jpg
2/f/4/2f49db67b20baeeb.jpg
e/b/e/ebe562f8b8427047.jpg
e/1/1/e1185397369bdd86.jpg
2/6/3/2638c4b1b6152427.jpg
4/f/8/4f8f7434816b5c35.jpg
9/d/5/9d51b66c6f1b5ad5.jpg
8/0/7/807149248b180747.jpg
d/f/b/dfbd1bf5d75788d2.jpg
c/f/a/cfaa9bf2e775cafa.jpg
0/a/d/0ad68a3acd493731.jpg
6/5/1/651e5c277d1d2562.jpg
3/c/6/3c6495c177ece8ef.jpg
8/8/9/88974946c75219c5.jpg
6/b/4/6b4b61839d872eb0.jpg
b/1/6/b16a29298a5027af.jpg
6/7/8/67888cafd7bf9ffe.jpg
a/1/b/a1b5838545731de9.jpg
d/b/0/db0c64df33fa0384.jpg
5/9/4/59471febb204eb56.jpg
4/2/8/428ce84bed4db0e6.jpg
d/7/a/d7a6c6094b820a18.jpg
f/f/4/ff4eed7ba58de79a.jpg
2/d/2/2d277c1a6486b658.jpg
d/a/a/daae703832278919.jpg
6/c/0/6c0a8e3d4ce20a43.jpg
b/3/5/b354a1929adf072a.jpg
6/8/c/68c01e4aac9cc0f9.jpg
f/e/e/feec84a9dee62304.jpg
9/9/a/99acf7af561b9605.jpg
d/7/8/d780a1019a9318d8.jpg
0/e/1/0e1b7ce420e2b0b9.jpg
7/5/3/7538014fca0c3acf.jpg
9/c/2/9c252b903587c47f.jpg
6/3/1/631327774df858e1.jpg
6/8/2/6826e1e8c10cfe8e.jpg
5/2/d/52d7f40a4c471fea.jpg
a/a/5/aa5b21ad17da8227.jpg
f/6/5/f6568cb6f0c958f1.jpg
a/4/6/a46c210259e89b46.jpg
6/9/d/69d11b29b6d82dc3.jpg
4/5/7/457612a3f32df4e1.jpg
4/a/d/4ad32fb2ab45334a.jpg
1/9/9/1992b92f2fab326a.jpg
6/1/2/61239f349c56c273.jpg
b/c/4/bc464c3af659537c.jpg
f/2/d/f2df6e1600281c1b.jpg
c/8/8/c887ee4dc3e8a388.jpg
1/7/d/17dfa2268b2d5708.jpg
3/3/1/331e3a848db2e70e.jpg
f/c/e/fce641b7533a9a71.jpg
c/5/2/c52b976cff796a11.jpg
a/4/0/a40e6dd304df6b11.jpg
1/d/d/1dd163c6fd82b085.jpg
b/1/2/b12be9a40b2ddd02.jpg
0/1/8/0182f97075a8ce60.jpg
7/b/a/7ba769c43f291f19.jpg
0/2/f/02f20479548cb9f8.jpg
9/9/0/9902d2b7ff2a9085.jpg
4/4/b/44b73a56633f25a5.jpg
3/d/9/3d9e738ef2584136.jpg
3/6/4/3645b6360922b1d3.jpg
f/f/3/ff3d96f896229779.jpg
e/c/f/ecf5ad06329bd762.jpg
c/7/f/c7f9fb459781816e.jpg
f/a/4/fa49e5d6e1ccd201.jpg
3/7/a/37a99575906b7e2d.jpg
c/9/2/c9279096af3cd9fa.jpg
e/3/7/e37a20ede78272a4.jpg
7/0/8/7088be17f05b2993.jpg
c/6/b/c6bfe43307f9e3a0.jpg
b/6/e/b6e00cacb511bf94.jpg
9/9/d/99d7fad12a201a46.jpg
4/7/5/4754cbfbb01853d0.jpg
8/9/3/8930fef879f19703.jpg
8/1/1/8115e8edf9a8e815.jpg
0/5/e/05ec30584061b56e.jpg
e/8/d/e8de04c8ddceaa3d.jpg
d/9/2/d928103201beaa0b.jpg
2/d/b/2dba0ea9dfba9048.jpg
6/a/7/6a727981796da5c8.jpg
4/1/5/4155c5451e42ded0.jpg
3/c/e/3ce5d77d870a9c45.jpg
5/6/e/56e08856b16bb376.jpg
9/e/0/9e0e20cbd079fe6b.jpg
3/5/f/35f54a8a1eefd15e.jpg
0/7/0/0703a9e11727c60e.jpg
1/a/8/1a8d4dd08668a1ea.jpg
c/9/2/c921192abdb2db5b.jpg
6/9/6/6969519891bc04b7.jpg
9/3/a/93a2d367f9cf59ae.jpg
a/d/a/ada8ea6780e746d7.jpg
2/b/c/2bc089612292405f.jpg
f/e/d/fed3df32b0249556.jpg
d/e/8/de8758309d9ec9b2.jpg
a/3/8/a38812e2a9b00307.jpg
f/c/9/fc9497b57c4c193a.jpg
c/8/e/c8e59c56e97d10a3.jpg
e/3/d/e3d2ca6bdec84c6c.jpg
8/b/7/8b7fa7ed26d80cc0.jpg
9/5/3/953b42760cd47e0d.jpg
c/f/a/cfaaf8860a59a214.jpg
3/6/7/367731c2d09346f1.jpg
b/e/8/be8d45fb930e1357.jpg
6/5/b/65bb80a2179f4ae7.jpg
8/d/d/8ddc9863ab4954ba.jpg
1/a/7/1a785bef33af7ccd.jpg
a/6/f/a6fb7278f12aab43.jpg
c/0/c/c0c530e3b55fa2f2.jpg
f/1/7/f17819561a063fc1.jpg
b/d/c/bdce8dcd0489c76a.jpg
a/d/2/ad2a7d1f60a88c4c.jpg
8/f/5/8f5fb620cb10f1a4.jpg
d/5/c/d5c29972de97ce80.jpg
5/c/d/5cdfcb9157ba600d.jpg
8/c/d/8cdf2e5ece6892f7.jpg
e/4/1/e41f472de7ad410e.jpg
3/7/5/3753784772bca3c0.jpg
1/6/3/163eb221d7b65562.jpg
f/2/e/f2e87dcd492c850f.jpg
9/f/9/9f9f86cdd4175701.jpg
d/c/7/dc77d6326b5061c1.jpg
8/e/9/8e90af23076b3a6d.jpg
d/4/1/d41aafd8af726415.jpg
8/0/b/80b49bedf1ad4839.jpg
f/1/c/f1cf48dd4aa0e3a2.jpg
3/f/2/3f2e4a3f3780a3fa.jpg
4/a/9/4a9d838d173fcba8.jpg
1/2/2/122eceed0ee6d48d.jpg
7/9/b/79b2dd179ae72dca.jpg
8/a/c/8ac25cf76ce6d509.jpg
2/d/5/2d5932671ef053cd.jpg
2/b/5/2b599edaf0aee6a9.jpg
3/5/5/35519f6c00fceeb8.jpg
d/9/9/d999b172a44c1659.jpg
0/6/b/06b1e8cbb066e1f2.jpg
6/7/c/67c122e7e8938bdb.jpg
5/a/5/5a55b0029b50bd43.jpg
e/f/f/efffe2e35e93e33e.jpg
4/f/3/4f352d2d5acc13c8.jpg
e/4/e/e4e8997379b89f30.jpg
b/1/4/b14c6d0e5a550d4b.jpg
3/d/2/3d275628ac87c2e3.jpg
a/3/4/a342d78a0e09c15d.jpg
7/c/d/7cde2ad76a650187.jpg
8/7/4/8745dc58826048d6.jpg
6/b/9/6b94f0239cecdf99.jpg
8/1/0/8100f26b8853f5c2.jpg
1/2/9/12982787f9c31cde.jpg
c/c/1/cc1d342483926b9c.jpg
8/f/5/8f5bbc034b8b6e4a.jpg
e/7/9/e791e316834f5307.jpg
8/c/c/8cc2c36cb9135ed4.jpg
b/6/b/b6bc97cf8361d02b.jpg
5/f/2/5f2b3afc134b835d.jpg
5/a/9/5a940623d8a61f2a.jpg
2/b/8/2b80b4c48c92520f.jpg
4/e/d/4ed874396d33ede5.jpg
8/c/8/8c8a440d3b3cbb48.jpg
4/0/8/408908f3910b2184.jpg
a/4/0/a4025476bc8d151c.jpg
9/6/3/963220192ef4aa39.jpg
8/0/b/80b6825d36a9dd35.jpg
f/2/f/f2f883699e7f0bf1.jpg
7/1/1/7115475397c25eb1.jpg
b/b/d/bbda0ce8da92f1e4.jpg
4/9/f/49f6dba40b4f3263.jpg
8/f/b/8fbd8c8823bbc8fd.jpg
d/d/2/dd2ca614e6b03582.jpg
4/3/3/433879f7cfb53246.jpg
6/8/a/68a013bd9dd1e20c.jpg
3/e/6/3e61ee91b3875e38.jpg
8/3/c/83c653cfca6ba699.jpg
0/a/3/0a3a7b3c90a5f25d.jpg
9/2/e/92e0b6cc98531044.jpg
f/f/c/ffc36f32c618b115.jpg
6/3/e/63e898a7d5c0b9c6.jpg
d/9/f/d9fd09cd13124118.jpg
f/9/1/f918912d9158a0f8.jpg
d/5/c/d5c4f98b9500853a.jpg
c/6/3/c6396c82369fa2ba.jpg
a/a/f/aaf79a084b07790b.jpg
b/5/3/b534694aa45e1de4.jpg
b/e/a/bea52f6617a1e70c.jpg
f/9/f/f9fc93a401ea8342.jpg
c/5/0/c50895ba0fe43f50.jpg
e/9/a/e9a9d2a6d0223238.jpg
b/a/9/ba9fabe395bd273f.jpg
b/7/a/b7a1b13ad61de5f3.jpg
4/f/0/4f0168d340b06723.jpg
a/1/7/a17714e2018f6dce.jpg
f/b/6/fb6a34534379d4b7.jpg
6/4/5/645fc1a8b90f35a9.jpg
1/e/f/1ef6ecb397572ab7.jpg
9/6/7/967afbd7acc755fe.jpg
9/3/d/93de1cf140b0fe16.jpg
d/8/a/d8abf2ed20576627.jpg
a/4/9/a49240c188af65e9.jpg
5/2/1/521c1f5034af7556.jpg
7/f/8/7f8efd37160aee7c.jpg
4/9/6/496d1290a24f6f0c.jpg
6/5/6/65622d751ee800cf.jpg
e/b/6/eb6fb0f50dba4377.jpg
4/4/2/44264671ccc07435.jpg
a/4/7/a47ffe9b676a6c5c.jpg
5/e/0/5e052f96369ae6ec.jpg
d/6/b/d6b03a9dd45ec185.jpg
f/3/a/f3ada42c7ad21732.jpg
9/c/c/9cc1da76359caf4b.jpg
5/5/b/55b330a0da4b7da0.jpg
c/3/f/c3f7e95bbeccc72f.jpg
4/b/b/4bb5fedbc2b6bb24.jpg
e/d/a/eda4232a5be06277.jpg
5/2/f/52fca20d61f4ba8a.jpg
7/9/b/79bcb40a3f6b3b75.jpg
a/4/5/a45b42a3d33d6c18.jpg
0/e/f/0ef8b1e25bdb78e5.jpg
d/0/4/d04e30c8d904974d.jpg
c/3/4/c346154ebeeb3ca3.jpg
3/f/b/3fb210b41ea63c5c.jpg
5/a/c/5acc6411417fb9ad.jpg
3/a/5/3a57065cc3371b31.jpg
0/8/5/085c3378ad08f384.jpg
9/c/9/9c9f5db0fe047068.jpg
6/d/9/6d9b91231fa0b393.jpg
2/2/6/22622885021bc38a.jpg
a/9/0/a90924240d38a665.jpg
b/c/5/bc5c34ad3c75cdcf.jpg
7/f/a/7facf09175e02a4c.jpg
4/4/3/443c501c02394ac7.jpg
c/7/9/c795d3edd00b3d9c.jpg
8/1/7/8171bd94ea0b61c8.jpg
a/7/2/a72b5b6f08316612.jpg
8/8/9/8891a69a3b1ec70a.jpg
3/4/a/34a549470fea2cc0.jpg
3/8/3/3835d9b5b8e191c1.jpg
d/d/3/dd33fcffbd93655c.jpg
9/3/9/93906c72f4e01a3d.jpg
e/7/e/e7e1415b8a7e802e.jpg
e/4/6/e467efcf76352d3d.jpg
0/7/f/07ffafa6399009ab.jpg
f/3/a/f3ac48cbf09dbc16.jpg
5/b/2/5b256e2d5ec4dd76.jpg
a/a/8/aa86350a56f88a48.jpg
4/4/5/445fe8b823c23c17.jpg
f/1/5/f15df59a240b7e80.jpg
2/0/2/202e2cfd241f5d1f.jpg
b/4/8/b48d9926baef4314.jpg
8/5/b/85b96fb825769462.jpg
e/0/2/e026d1677ebe06b0.jpg
3/f/7/3f73c2b57c6838bd.jpg
d/8/0/d8091c1df5bdebd7.jpg
c/9/7/c975cc3706d56289.jpg
2/b/8/2b8aec825cb9d606.jpg
5/5/c/55c7d23a39be0805.jpg
5/0/1/501dc95c5c5234f2.jpg
6/a/b/6abc64d5e34fa032.jpg
3/a/0/3a0de03db7e4e195.jpg
9/3/0/930f63bb5b90fdd8.jpg
6/4/4/6443a446863cfbc7.jpg
2/e/6/2e63f135c0e7ad3c.jpg
8/2/3/823fbceb28b51002.jpg
3/a/4/3a4309600487c8de.jpg
2/c/8/2c87ade7eacd7e8f.jpg
0/4/c/04c81fc9911b02bb.jpg
8/c/7/8c77ec96e21e8b89.jpg
1/f/5/1f53a9b05a094e8c.jpg
4/8/c/48c45cf2dd2df560.jpg
5/f/f/5fff8993d79782a9.jpg
c/f/e/cfeeaf7dd0a6a121.jpg
a/6/9/a69aa701aa9ecd50.jpg
6/6/d/66d44957a652167d.jpg
5/6/2/5623f2a2343c48d6.jpg
7/4/7/74783ad42149c9d9.jpg
c/f/2/cf253eb3309ef354.jpg
7/3/4/734234964075aebd.jpg
e/2/a/e2af7ab0d8a6c0d6.jpg
9/3/d/93db103ededa30f4.jpg
0/f/a/0fa60b02a8db0319.jpg
6/9/6/696c2533eb2d3bb7.jpg
4/6/8/468c4f4d3f740c1c.jpg
6/4/b/64b6c8a55082b97c.jpg
4/a/d/4adb4a418de88949.jpg
6/0/d/60dd0ad67f5a942e.jpg
1/c/2/1c2f28228febcadf.jpg
2/a/b/2ab426e481b27fe1.jpg
d/a/b/dab78c7b03d14013.jpg
8/3/5/8351e9692d579be3.jpg
6/9/3/6931f7204df03c75.jpg
6/c/1/6c1fe5612189a49e.jpg
5/5/7/557061c7ab93c2d7.jpg
d/6/c/d6c591842a31bdba.jpg
b/7/a/b7aae0756934acb9.jpg
3/c/8/3c8b04cfaefb4aba.jpg
d/9/a/d9a4fe50b71d41ac.jpg
6/f/f/6ff9f96c6c71d79e.jpg
3/d/3/3d302b31c2b650e5.jpg
5/1/c/51c667484e2c52f1.jpg
a/3/2/a329744c7c237dd7.jpg
6/7/8/6782ca5234dd18c5.jpg
7/1/0/7102667ad46cbf22.jpg
1/f/f/1ff4dde24f3ce792.jpg
0/b/6/0b616c17d9f9cd43.jpg
5/a/6/5a6dc1db9f4c670c.jpg
2/8/f/28f417e652faa88f.jpg
e/a/3/ea3bb8ad5863231c.jpg
a/a/2/aa21686e2b393966.jpg
3/c/6/3c6e6a99971830d5.jpg
f/5/a/f5ad2035041ba06d.jpg
c/3/e/c3ee365407016d61.jpg
3/5/3/35316fdf52366b49.jpg
9/f/9/9f92f261bd19c614.jpg
f/5/7/f5703d72139ee1fb.jpg
e/9/8/e98d86a54c0c1386.jpg
3/f/0/3f0d3cb1213f081d.jpg
4/6/3/4632cd0934da5da5.jpg
7/6/4/76492ad04dccf980.jpg
b/3/b/b3b79d5de8dfa967.jpg
3/9/1/391b591fa42f7c8c.jpg
8/8/1/881c76e8dccca678.jpg
2/3/2/2325fa8e86679f69.jpg
8/7/c/87ccdb69242343a0.jpg
f/2/1/f218826403fcb7f9.jpg
0/4/0/040f395bb173f895.jpg
6/c/d/6cd3796cec710479.jpg
b/6/c/b6cf7aeae916c8c1.jpg
a/3/e/a3ede10a01093d77.jpg
5/f/c/5fc8fbd1ed0c15a6.jpg
4/5/0/450acd62277f88bf.jpg
e/3/e/e3e6a443f524a6f0.jpg
c/8/8/c8889af5160672b1.jpg
c/c/9/cc98077d18ea764d.jpg
b/d/1/bd162d8744d62298.jpg
7/8/a/78aef677a8a380bc.jpg
8/8/d/88dbc0202e9bb938.jpg
2/d/1/2d1a385601ccc031.jpg
5/9/2/592b57e4b5c2ff6f.jpg
6/c/4/6c4d590b1a5ad2a1.jpg
d/a/1/da124d64f5257cdc.jpg
6/5/0/6503bfe884f9cb55.jpg
c/5/c/c5c53d1d2464d582.jpg
8/e/2/8e289d140fe076ba.jpg
a/1/7/a175d9671845165b.jpg
5/1/c/51c4dccfad783b37.jpg
d/0/2/d025352c7e79e664.jpg
b/7/d/b7d13854a4b9abed.jpg
2/1/0/210ba9258850b287.jpg
6/f/b/6fbb0711824649f6.jpg
c/6/7/c670027133658288.jpg
1/6/f/16f5f3cdf6421f0c.jpg
d/9/4/d9474f0fb3457adb.jpg
b/f/8/bf85962c0dec36c2.jpg
2/9/e/29e06eb065ccfd4e.jpg
b/e/a/bea919e6cdaf03cb.jpg
d/d/7/dd7a581cddea66cf.jpg
9/d/2/9d2caba20f12e4f9.jpg
6/3/e/63e481bba663923c.jpg
0/a/6/0a62f2a1fc0d6265.jpg
6/5/4/6547863084a75060.jpg
3/b/2/3b20189cbd315ba7.jpg
9/e/d/9edc9d33cb4fa29a.jpg
f/f/4/ff4d5cfdea8d267b.jpg
b/c/2/bc214b815fcd0cc2.jpg
0/9/1/09103ec7f373251c.jpg
0/9/9/09977de4315e26a0.jpg
1/0/c/10cbc1ca3d093886.jpg
9/7/b/97b9b802438406be.jpg
d/f/7/df721cb06b0c19da.jpg
2/6/b/26b065b47414296e.jpg
5/0/5/505575a4185ba3c9.jpg
1/1/2/11228b12d5aea85f.jpg
5/5/1/551c1107ee88841c.jpg
c/0/c/c0c04b15dfe7d183.jpg
3/7/0/370a6c35d873284a.jpg
6/7/2/672d3ca9550e7922.jpg
1/e/c/1ec4c1d0a83f7a71.jpg
e/2/4/e24ded5f95e4df78.jpg
2/2/4/224c9c93f019946a.jpg
d/9/4/d943953da11eded4.jpg
e/6/e/e6e12f03633fd8a3.jpg
d/1/8/d18933f95681ac28.jpg
1/8/9/18903ad6ccf2d33e.jpg
f/6/a/f6a3444abf6dffee.jpg
8/3/b/83b0804e10c3ad80.jpg
c/4/0/c40cf7f1ecdb60da.jpg
e/0/5/e05b0938f0f5ca3d.jpg
c/4/a/c4acabbb4bccc146.jpg
3/0/3/3038cbf0299ae4e0.jpg
6/5/7/657afe83f8ac1d7d.jpg
2/8/6/2861ab00614287da.jpg
d/f/e/dfe54f53192db40f.jpg
c/5/2/c527485cd9aacf32.jpg
6/2/0/620dec7d820d2dd6.jpg
5/3/8/538b2fc357e0dc60.jpg
3/4/b/34b8cf7ebba66846.jpg
c/1/8/c18836fdc862c3c3.jpg
a/6/3/a633082aa0a7540a.jpg
2/9/2/292a592f6337ac68.jpg
c/f/3/cf30937ccc3a40af.jpg
c/7/f/c7fa08a308372743.jpg
b/3/1/b31960deb992da2d.jpg
5/6/3/563f3ecbd939cd20.jpg
2/8/6/286bc1413acb334d.jpg
4/0/d/40d0d12e79f1b991.jpg
9/5/7/95702846cb415b43.jpg
d/b/0/db09abaa9b75aaaf.jpg
4/d/e/4de73fa2b2a6d69d.jpg
c/4/c/c4cbe019a85cd6e5.jpg
0/3/3/03329c7102d1fa89.jpg
c/a/7/ca7e5290a1f79f05.jpg
6/d/c/6dcd1a3b55347d37.jpg
b/1/a/b1a5907b36a99399.jpg
1/2/5/125d29b6a143424b.jpg
b/c/a/bca16b9c1ad06933.jpg
b/e/5/be5b2d9f6d8c3b25.jpg
0/2/f/02f9664cd5204d55.jpg
a/5/b/a5bc638b6dd8a686.jpg
5/8/e/58ec920b74ebf605.jpg
d/a/a/daaf529d2850ff41.jpg
9/5/4/954e7969ac8ad3ff.jpg
0/0/4/0048bb91ae6d2fa4.jpg
3/d/a/3da517e42038bae8.jpg
d/5/3/d5357c69deb2a29f.jpg
6/0/5/605ff17fb5eac3ad.jpg
2/a/a/2aa19edc9d650793.jpg
3/5/4/35492f7127d02890.jpg
e/0/9/e099292d6aee9efa.jpg
b/b/5/bb53004193535744.jpg
9/1/2/912a43c7476071a9.jpg
3/f/0/3f0cd88172c05eb4.jpg
c/a/4/ca4161bc844a2fdf.jpg
a/9/f/a9f7127cac6f645a.jpg
d/9/7/d9744d9f916fe685.jpg
f/f/0/ff0e868fc06029f1.jpg
4/8/0/480544eb1f13f4f6.jpg
a/9/9/a999df07ef332eff.jpg
d/c/f/dcf2534d21a2ea20.jpg
3/f/1/3f189bf7fef48d45.jpg
e/6/f/e6f4c693e5427bb6.jpg
b/3/7/b378d52004fb22b5.jpg
b/1/8/b18b5f3064d063a7.jpg
4/e/f/4ef6e6d2c0f8d0ee.jpg
4/f/8/4f8388040a0d1728.jpg
8/2/8/82832896ba83c3e7.jpg
d/e/3/de3740ee24e4e12a.jpg
3/c/c/3cc66baa15b298ed.jpg
7/8/f/78f09c9aa27f1966.jpg
4/1/4/4147bf18e5931292.jpg
8/5/f/85fa290fc91cc42d.jpg
e/7/6/e76737ee1cb91368.jpg
9/9/2/992f3a55cf86b955.jpg
0/a/2/0a284b73bac787dd.jpg
1/4/7/1477574a13d3e09c.jpg
e/4/5/e4505d5de01d3912.jpg
c/f/8/cf84a650e5349de6.jpg
f/5/2/f52fbb33c2ac713b.jpg
8/6/1/86167a403bc74fc7.jpg
8/a/1/8a15906ae32ecee3.jpg
9/0/d/90d8fd6ad86d71bd.jpg
1/c/3/1c30a86ed737f2e2.jpg
f/a/a/faae499bb55b6f0b.jpg
0/8/3/083e33c7367b5c92.jpg
a/e/7/ae74b72e28561c5a.jpg
f/f/7/ff707f388c1bc848.jpg
4/4/d/44dec799d1669232.jpg
0/c/3/0c3dde2cbe4b3dc2.jpg
2/3/0/2301533c86b89805.jpg
e/1/c/e1cb72aa550d224f.jpg
0/e/7/0e73ec50b78ee796.jpg
1/5/7/157482541e69a2fe.jpg
a/e/6/ae6726eb837ff0c2.jpg
2/8/0/280a5e37b78fb8b6.jpg
a/6/0/a60145bc357e2230.jpg
f/f/7/ff7fd1ea932778d8.jpg
a/1/7/a178b60263b54fa9.jpg
d/0/5/d05196625871c104.jpg
5/f/1/5f103921a08aaaf5.jpg
e/9/3/e93c8d8c11e51312.jpg
1/a/4/1a4d0073024dd8dc.jpg
8/1/d/81d5ec5afcfc3b5d.jpg
1/a/9/1a983fe571ff486b.jpg
2/f/8/2f881ae4f7138140.jpg
a/e/c/aecf6921922770a0.jpg
d/c/9/dc9d4cbabd3d8340.jpg
f/8/a/f8a99acd53e3f2a4.jpg
d/8/a/d8a255abf551ebd5.jpg
a/3/1/a3174ee4be302ac1.jpg
8/a/9/8a9d11b9de3f2150.jpg
5/a/b/5abe4eaf70183dcd.jpg
5/c/c/5cce958e062922a9.jpg
9/6/3/963a3f622c1972d5.jpg
7/a/e/7aed84b848e5baa6.jpg
4/6/6/4663b382c57453ca.jpg
e/d/5/ed5e8c89ad1ec33d.jpg
3/0/f/30f06287abde8f09.jpg
3/d/1/3d150f9aa68f81b1.jpg
c/a/8/ca84085f4a51b157.jpg
6/b/3/6b33e03b0a153933.jpg
3/a/1/3a186537c98aaeac.jpg
9/6/7/967c81ac05c41871.jpg
f/e/f/fefc85fdc647bbaa.jpg
5/1/d/51db6b6915723dee.jpg
0/f/b/0fbc5e25e8fd64a3.jpg
e/a/0/ea0ef3c8845da463.jpg
c/4/b/c4b085f8c8128348.jpg
1/9/6/1964dea5f204706f.jpg
6/b/3/6b3494481e8e7256.jpg
f/5/e/f5e4ffb1b9fbb255.jpg
c/6/d/c6d7103313f2bedf.jpg
e/e/c/eec8d7c018cd8ca7.jpg
4/b/1/4b12184fd409466d.jpg
2/9/8/2987aa585fc6de4a.jpg
6/f/e/6fe1b6061d6d884e.jpg
c/6/f/c6fb7baee69b123b.jpg
a/e/8/ae83eb6fd020f7b8.jpg
0/3/a/03a937aad016a5f2.jpg
4/b/f/4bfbba179173564c.jpg
4/2/0/42029b169dd6a665.jpg
8/b/b/8bb5be2a3f80bb17.jpg
9/1/0/910ebde16e2bfdcf.jpg
9/1/2/9124ccee6a3ea052.jpg
4/8/b/48b5b3cd04d5e255.jpg
d/7/4/d7465225c672c16c.jpg
5/2/1/52107e283b7d08c4.jpg
d/f/c/dfc6317242ae4894.jpg
d/d/e/dde9046cf4b691f3.jpg
3/8/c/38ca2cd07f55a51b.jpg
8/6/f/86f17794d0757d2d.jpg
3/6/6/366b289a168e89e0.jpg
3/c/1/3c195e05e3b02416.jpg
1/7/b/17bbfe561f3b0ce3.jpg
e/e/6/ee6b3a1a6b1d7b29.jpg
e/0/f/e0fafa3e50c83be8.jpg
7/c/8/7c802c5ff77369e6.jpg
b/4/d/b4dc4d697b7df558.jpg
f/4/0/f401558bff98ff01.jpg
7/f/2/7f20dbd2864a5aad.jpg
7/8/e/78e2f58f7b72f690.jpg
e/6/c/e6c22d37506df532.jpg
3/d/2/3d2cd185511f5cac.jpg
7/6/9/7690b48a47bf10cb.jpg
4/d/a/4da3c588ed13931c.jpg
5/c/e/5ce7d9955894cb24.jpg
1/6/1/161bd33d7d8e20d7.jpg
a/a/b/aabacf0c537bb1cc.jpg
0/c/2/0c2ed50ebaa7e541.jpg
f/f/3/ff39227a12018783.jpg
d/5/d/d5d7224492f38452.jpg
e/4/0/e40244193e9424fb.jpg
1/7/4/174ff49d7e94d42f.jpg
0/2/a/02ae20b7255540a6.jpg
6/4/c/64c174edb24ee5eb.jpg
4/8/8/488d56651b8b364e.jpg
6/4/c/64c5b5f26cfc58df.jpg
d/8/7/d874a2294291ddfa.jpg
3/6/5/3653815d83bbaecd.jpg
0/3/e/03e9cf21eaa1a7fc.jpg
2/e/9/2e9e448a3ca6f97c.jpg
d/4/8/d483ba19b3e3ae90.jpg
7/9/0/7909bd881b22ead8.jpg
d/5/2/d52fef56663b6e2d.jpg
f/1/8/f185c1958abea792.jpg
b/7/2/b72e05e707d6bcdb.jpg
b/3/7/b37908488cb04d78.jpg
0/3/c/03c80a66b29de434.jpg
f/e/9/fe999162e44c1af3.jpg
0/e/c/0ecdd4e3e02de8ad.jpg
7/f/6/7f60b578e733aa16.jpg
0/c/e/0cef3bd939cd4465.jpg
2/3/9/239b71182ab93071.jpg
6/e/f/6efd791d28677239.jpg
f/6/1/f61f05a804c600db.jpg
a/b/7/ab737efe65e42cc8.jpg
b/f/3/bf31255fcbdbb8b3.jpg
e/7/f/e7f4e257d7711c80.jpg
a/8/f/a8fb8c20a38cd55f.jpg
9/e/e/9ee140196b5ae2d9.jpg
7/2/8/7289028dd604bd74.jpg
5/7/7/577442db8fb62807.jpg
3/6/4/364ae8c349f3c77f.jpg
5/f/0/5f0f844ae1837165.jpg
2/c/f/2cf97d076c4a0d46.jpg
7/d/9/7d95c589b3dca564.jpg
0/9/4/094e2fd88a1462b2.jpg
2/1/4/2145afd3e6c0fb2b.jpg
8/c/4/8c45207a23175b95.jpg
3/c/3/3c3ebfa9a0978d32.jpg
2/3/e/23ed9cc75cc89350.jpg
c/d/b/cdb12bc7619a50d5.jpg
a/7/c/a7c1182231dc9908.jpg
f/d/d/fdddf87716e4343b.jpg
f/f/2/ff20f06fcb06fc78.jpg
f/c/a/fca4b68de9085438.jpg
9/9/0/990e2e47c3106aab.jpg
5/2/e/52e5431276a5ed9e.jpg
3/8/f/38fbf457a856f1bf.jpg
7/8/6/7869e24f343f700c.jpg
f/4/6/f465527300ab7818.jpg
2/6/0/26042cda1d2a3cb1.jpg
7/2/0/720440e36115d685.jpg
0/f/9/0f9b55e9426a77aa.jpg
3/f/e/3fe87337cc139364.jpg
6/3/0/630ffc8272851b14.jpg
b/e/d/bed1dad40f1b9317.jpg
1/8/a/18a3006bab5fc71c.jpg
3/a/4/3a4c7ff3f95d425a.jpg
b/d/0/bd004af8fc2781f3.jpg
4/f/1/4f14e5c6bed71f76.jpg
5/7/e/57efd6a74b097078.jpg
9/9/4/994dbf9260a600db.jpg
6/4/6/646558590515e4cd.jpg
0/0/4/00420a67106aa256.jpg
0/8/2/082d598b283ea441.jpg
9/4/b/94be959c1b9d3fd9.jpg
4/b/6/4b60dfb848f06d05.jpg
2/4/2/2420c072982a2ea4.jpg
6/e/3/6e3697a1ed38c77d.jpg
1/e/7/1e75bd545d730904.jpg
7/b/0/7b04639c61482202.jpg
8/c/3/8c3e21043d9e2d7d.jpg
2/d/3/2d3909c45a7eca0c.jpg
a/0/2/a0298b58ea2f9a0c.jpg
5/0/b/50bc90a3a0c418b0.jpg
f/3/4/f34c68bf8f673929.jpg
8/2/b/82b4a1c52d781976.jpg
5/2/1/521c023f5f6fef03.jpg
4/7/d/47d31f79c6716425.jpg
9/e/0/9e0aea66393ea2d9.jpg
e/1/4/e146d454a1460d83.jpg
c/7/5/c753ab2f295ad005.jpg
6/d/a/6da0a88fc8092201.jpg
5/a/e/5ae8799d35bcf4b7.jpg
f/8/d/f8d540cd2a03f14e.jpg
e/3/5/e354431c6a572cec.jpg
f/c/9/fc95a085126787b9.jpg
2/9/9/2992f6b6743e3bab.jpg
2/a/5/2a51f66a2d1a7f27.jpg
c/d/f/cdfb36d71c347bac.jpg
8/6/3/863d53911e753383.jpg
9/d/2/9d2d0bdc0f3fe753.jpg
5/e/9/5e9a1f2644cd066c.jpg
b/1/0/b10e6d51cd709139.jpg
1/6/e/16ed8828917b9fa1.jpg
b/3/f/b3fcb85423f58e4b.jpg
b/1/d/b1ddce4082c324d3.jpg
7/2/0/720f0ae7e96a19c6.jpg
1/0/d/10d1026c39453096.jpg
a/1/6/a16cb5ff1bc8448f.jpg
b/3/c/b3c71d1703e091b9.jpg
e/d/7/ed79879b8a652345.jpg
1/2/6/126f1ba00f3cf836.jpg
a/a/8/aa82ecf00db30b46.jpg
6/6/c/66c69e96f44a7742.jpg
e/5/2/e5297eb7ed7c627d.jpg
d/9/2/d923ae722a4961bc.jpg
e/a/0/ea0afedbb19e4db8.jpg
b/4/7/b47d89e85567abec.jpg
3/c/2/3c2e77b05f7e24ed.jpg
f/c/d/fcd16b2f705caeb6.jpg
7/a/1/7a1c3894f495c931.jpg
7/7/d/77d44c511ee66346.jpg
0/0/a/00a33aad5327a038.jpg
5/c/8/5c874503bf6698a4.jpg
c/5/2/c52b8744b5544462.jpg
9/d/f/9df195663f6b3151.jpg
b/0/3/b031efb9f008cee6.jpg
e/3/6/e363c9d2a94db20a.jpg
0/1/6/016846f3c321dfed.jpg
8/0/d/80ddb2767d8d3e85.jpg
5/3/d/53dbc18a0a578899.jpg
1/1/c/11c2978665419588.jpg
e/5/2/e523a48f32d68a97.jpg
f/c/9/fc916abfa40a9799.jpg
e/d/4/ed4321ea6ac3e1c9.jpg
8/6/5/865f6ae7d319af20.jpg
0/6/8/0681d8d153d26ed4.jpg
7/6/1/7611b9815c5bed04.jpg
9/e/6/9e67f395f0fb2848.jpg
1/a/8/1a85cc1b2f70f662.jpg
5/8/1/58141d772f0be3cc.jpg
b/2/c/b2cb23fbf385a3d8.jpg
4/b/7/4b7f6e01e380a33d.jpg
2/8/b/28bfe5dfd70b4bc7.jpg
c/0/0/c000b1588a664a87.jpg
c/2/8/c2843a3554e4e741.jpg
c/c/5/cc5ad043f8f789c6.jpg
c/9/2/c92c6a9478b63645.jpg
5/f/1/5f101ef94b545f1f.jpg
8/7/9/8798c269766d5c0f.jpg
1/3/b/13bdf38b006d7fc7.jpg
3/e/b/3ebeff4d5fda0781.jpg
2/9/4/294466adcf22644d.jpg
5/e/0/5e0ab10eab0fd2e2.jpg
2/4/f/24f74d70f347937b.jpg
6/f/c/6fceec85e6f0b48e.jpg
b/d/a/bda1cf14d9fcd25f.jpg
d/4/4/d442529e0680110c.jpg
f/f/2/ff2ba1e2cda0a529.jpg
7/d/1/7d13088d7c9b7037.jpg
a/5/5/a55e4bdedaa295e3.jpg
a/1/4/a141688323d4d8f9.jpg
7/a/c/7ace01126dce867b.jpg
7/3/2/73294fce2bc23632.jpg
e/0/0/e00919b100afd4b9.jpg
9/6/9/969a658cf7eb81f0.jpg
0/6/f/06fef9778e5535fb.jpg
0/2/b/02b74df324426a96.jpg
0/3/6/036d9f40b8424d8b.jpg
c/5/0/c502bf9f1e28492d.jpg
3/9/b/39b213005f53d91c.jpg
e/c/5/ec5bafaed2e3f352.jpg
6/0/2/6025a1df17e4b2cb.jpg
8/9/c/89cc73446245d597.jpg
1/e/e/1ee15ddedc05557f.jpg
c/9/7/c979a0aa537faa3d.jpg
8/7/b/87bbad568bdcdbbb.jpg
e/9/9/e99a16c63e3dfce8.jpg
2/a/3/2a31c88a38494ca6.jpg
6/a/3/6a3cab05b82909e6.jpg
f/8/b/f8b5db552da2c918.jpg
a/2/7/a27c4abec6bb0d87.jpg
3/8/f/38f49cc2623cf15e.jpg
3/7/f/37ff96c01d70d577.jpg
3/3/0/330691a1cb262384.jpg
a/e/a/aead940515e6bb07.jpg
9/6/c/96c3fe416093a7d6.jpg
1/2/5/125829f66dd5e096.jpg
7/3/8/738d36c2d40f4f0f.jpg
8/2/6/8267912c73659171.jpg
9/7/1/971f68b02c056fc8.jpg
c/8/b/c8be6c1478231591.jpg
1/e/1/1e18a96113ffb018.jpg
9/1/6/91691157e6c39d12.jpg
0/e/f/0ef1cf3f25b48e48.jpg
4/8/f/48fded11523da4be.jpg
2/9/3/293c57b453fa8bdc.jpg
a/6/9/a69c831eef7e0168.jpg
6/7/e/67e48c7a55b8f826.jpg
4/5/5/45548395d02acd60.jpg
0/0/a/00a63a1ad7cb21bf.jpg
f/2/9/f291f0e11789e504.jpg
8/e/0/8e07b3e9773735e6.jpg
2/d/b/2db98fc7654bf6da.jpg
d/b/7/db7724cdef221048.jpg
7/a/5/7a504953ac2b781e.jpg
1/6/e/16eb1ea741e2e854.jpg
d/1/6/d1663e8de16fd57b.jpg
a/5/d/a5de6191ebe8fb19.jpg
f/1/7/f1793050a0d96ed5.jpg
8/2/a/82aab53326d07e15.jpg
6/2/b/62b8872c400b4b4b.jpg
5/1/4/514c90bd87ad856d.jpg
e/3/f/e3ff7e5e886c99ee.jpg
3/f/2/3f25ddb7099a0337.jpg
e/7/0/e7003cdee9dbda7d.jpg
6/2/8/62852da03062affb.jpg
9/4/9/94943ddb9cda89d6.jpg
0/9/1/091e2b0dd30f3c44.jpg
3/a/e/3aed29634f38fa3c.jpg
0/e/c/0ec3e3768a4eb7a7.jpg
f/0/5/f0583a9c608b0bf1.jpg
f/6/c/f6c0349e6b60f334.jpg
a/5/6/a561b4247d625589.jpg
a/f/7/af7031f09bb85868.jpg
f/6/2/f6226ad017f29083.jpg
3/8/c/38c6f6fb97bf5044.jpg
2/0/5/205a8835124ebb92.jpg
b/c/8/bc83a498bcc03849.jpg
9/4/0/94095714bd722690.jpg
a/8/0/a809c6bdc64a69e5.jpg
1/3/a/13a42ce5c3afc026.jpg
0/4/0/04036a2e12200425.jpg
3/4/d/34dc8f40674c911b.jpg
b/f/2/bf2a0dcef9104b5b.jpg
0/6/3/063c71eb6d1bbeae.jpg
d/8/8/d883a6e91298a233.jpg
e/d/1/ed14118eb25a1cec.jpg
2/e/1/2e1813fae2d6e662.jpg
2/6/e/26ef4c4aab3d63cd.jpg
7/e/6/7e628f4d8f117f0b.jpg
d/7/3/d737521772e33985.jpg
1/4/c/14cdaaca29f398de.jpg
b/e/2/be2e1d3cb5549b57.jpg
0/e/d/0eda59cdace62b9d.jpg
b/7/e/b7ebfd4c06616196.jpg
e/2/7/e273dbb757a39107.jpg
6/9/9/699ee7ecae633065.jpg
2/4/4/244645618b25bd5d.jpg
6/f/a/6fa63c458180a826.jpg
5/5/5/555198e643190e0b.jpg
1/1/1/1114954031cf7865.jpg
3/4/3/343c4dc5fef3666e.jpg
8/0/b/80b1faa20ff7a7a2.jpg
c/b/6/cb691ba5b06c4e47.jpg
9/8/9/98987a652c776724.jpg
9/a/4/9a4430aa3f9cbb73.jpg
e/8/b/e8bd48f70fc0fec0.jpg
9/5/7/95733f81ab886096.jpg
9/1/2/912981b5ace65632.jpg
0/2/5/025dbfea81bb27e3.jpg
8/8/d/88db576b3df9fd07.jpg
a/2/5/a25ff894e9a6b69f.jpg
a/b/e/abe773f1c042cfd2.jpg
4/8/e/48e643124ee7de76.jpg
a/e/f/aef2535f2db12efc.jpg
8/7/d/87d4acb1851d87ee.jpg
c/7/f/c7fa49a7ed17e3e8.jpg
4/a/9/4a9c57f29d028991.jpg
2/e/2/2e2ed793873d7503.jpg
2/3/b/23b89240ed3eebee.jpg
a/d/2/ad21d19098c6c8a4.jpg
d/b/a/dbaaa4061391f97b.jpg
8/4/7/847c6e893ee0862a.jpg
7/1/3/713e515a91ef145f.jpg
d/e/4/de42ac090b1295a2.jpg
4/7/f/47fda7b3585691bb.jpg
e/b/f/ebf294a065d92990.jpg
3/8/f/38f596a86befbc8a.jpg
1/f/5/1f53ac48245780a0.jpg
2/b/8/2b878010b48e789e.jpg
4/8/6/48655da831f4e775.jpg
7/b/3/7b314d6dd3a6639b.jpg
6/4/1/6418e5ce6fe35817.jpg
d/a/2/da205e53ec153857.jpg
4/5/8/458e4c30ea0a50db.jpg
1/d/6/1d612cdd6f69a97c.jpg
e/8/9/e89d671f6e5522be.jpg
7/3/0/7308038bcde48b83.jpg
9/1/b/91b8fa4446daf401.jpg
7/9/e/79e80cb1a5c1f4ae.jpg
6/7/1/671d7356e0ce3f78.jpg
c/d/0/cd0cdec68b474317.jpg
c/4/f/c4f44b7d49a0645a.jpg
7/0/f/70fd01bf8a5c227a.jpg
e/a/6/ea60f8f0749932f0.jpg
0/c/c/0ccc32a10f49d1da.jpg
4/6/2/462a5495ab730c5f.jpg
6/a/a/6aacfabeb8954337.jpg
b/9/7/b976d62879bfd58a.jpg
6/3/0/630c724b7b057d01.jpg
3/c/5/3c5c3b7ec4a108ca.jpg
8/2/a/82a4bb90acbc7be6.jpg
6/f/2/6f24cf3bc915c5a2.jpg
2/0/a/20ab518a395b81bd.jpg
6/a/5/6a568af325a4aa77.jpg
e/2/6/e26868a1ba1e9abe.jpg
b/6/f/b6f33c567f051ee5.jpg
7/0/0/700cd8d73c6c2e24.jpg
5/9/a/59ac73d1d6e7d91c.jpg
e/b/2/eb2d5bd3c6b4b611.jpg
2/1/0/21027608e62f288b.jpg
0/0/7/0079d4efb83677e9.jpg
c/2/b/c2b94e1859fdbb61.jpg
c/9/f/c9f6d264fe6be86c.jpg
1/7/c/17ce33129901b750.jpg
f/9/1/f912fd27223cb028.jpg
5/1/d/51d8ba5c76b85437.jpg
8/7/4/8741bab6a1049ee0.jpg
1/7/0/170b3fb960517559.jpg
f/f/6/ff6fe3c793bd30fb.jpg
1/1/1/1119117f9430dabc.jpg
8/5/3/853b84836dcc4ec8.jpg
3/7/9/37970571a7f40f37.jpg
4/6/6/466d98acd27ba1f1.jpg
c/0/b/c0b5bfbd2b7d0286.jpg
0/f/6/0f6e2222303d57ca.jpg
b/5/d/b5d1547633bd5f2c.jpg
e/8/5/e85b217ca743cb99.jpg
e/4/5/e45fec4661c7da33.jpg
f/3/e/f3edf25e884f072f.jpg
6/b/3/6b331f53a212f6d1.jpg
4/b/2/4b2014526dfa523e.jpg
f/7/2/f72f2753c5b300c5.jpg
e/a/9/ea951331ee109d27.jpg
6/8/c/68ce8297ea65e84a.jpg
3/b/8/3b8483ad32457808.jpg
d/2/1/d2135d0ce93a6c8e.jpg
a/9/a/a9a821b96d472c74.jpg
9/c/1/9c114c6727335b68.jpg
c/e/f/cef7b7497a2b1123.jpg
7/5/1/7518d5ca1f526fb0.jpg
5/1/f/51ff6cce9584bab1.jpg
f/d/8/fd82430f63e53877.jpg
b/1/7/b17c53f03345060e.jpg
e/7/6/e76699e241ee6d6c.jpg
e/0/a/e0ac81d80984c772.jpg
7/8/9/78956b6afb2805c2.jpg
b/f/5/bf5f2137e016a1cb.jpg
2/4/a/24a9679df23b2740.jpg
d/b/5/db57c95be09641ed.jpg
f/5/a/f5a686ca3a7db7c2.jpg
9/e/8/9e8ab2556250fc8a.jpg
7/b/2/7b243b61e0b2b6f9.jpg
6/0/8/608b497144cc1cce.jpg
b/6/1/b6130d00683e924a.jpg
c/c/8/cc8fd9724729432a.jpg
b/2/2/b22577b4175857a7.jpg
a/f/c/afc2059698329723.jpg
6/4/6/646001fa63d52413.jpg
e/0/d/e0dccc3ebfa4d330.jpg
9/9/0/990c5ec4c75ea238.jpg
e/0/d/e0dc904223eaeaab.jpg
c/f/3/cf392f542fcf891f.jpg
e/a/0/ea0b051b8f76b157.jpg
9/3/1/931e30c3dfad77a0.jpg
a/b/d/abde27c9887486f3.jpg
7/5/b/75bc3a034090f31d.jpg
8/c/5/8c57a1112c36bb52.jpg
5/5/9/5591c098fb4d337f.jpg
f/b/9/fb9e99694768b17e.jpg
0/5/0/050cd8368a268ce7.jpg
c/2/2/c228d0d40326ddae.jpg
2/4/e/24e40ef7db5b668b.jpg
a/5/2/a524ed417a6e8a31.jpg
6/9/5/695a740038a82712.jpg
a/6/9/a69d71984fd7343d.jpg
b/5/3/b53ecfe7617102fe.jpg
f/5/4/f54cadafe1a64880.jpg
b/2/7/b27d7a4b7eaa9127.jpg
7/2/1/721a1b38516a9454.jpg
b/1/0/b10619b18daf5944.jpg
d/5/7/d576f0f13d510fce.jpg
d/8/d/d8d0f1c4162c6265.jpg
b/1/1/b1159d1fbcc9079f.jpg
a/7/6/a76ced18899aa74e.jpg
5/8/3/5836e48e6fd949c9.jpg
2/1/8/2181191382c9704f.jpg
6/1/0/610450a2656140d5.jpg
9/9/f/99f2c72c8159299e.jpg
a/6/e/a6e20679b06712f9.jpg
7/c/b/7cbac5795b903d82.jpg
8/1/1/811e9a1c9a52f654.jpg
a/2/c/a2c8209ace5bfbeb.jpg
e/9/2/e9204f750b19f38c.jpg
5/a/1/5a1e6b25a7e167f9.jpg
a/5/0/a50edd94ac469846.jpg
4/9/1/491ba08d4a24153a.jpg
e/3/8/e383e2fa4d8d6dce.jpg
4/2/6/426ec7338b3a3fa0.jpg
f/1/2/f123e1ce1e6ee820.jpg
1/b/0/1b0ddb473a319029.jpg
0/5/b/05b7bed10b0e1d84.jpg
4/2/b/42b3f8eaf9d483a5.jpg
7/9/6/7962edbad89a7d22.jpg
d/2/9/d295fca1575663f7.jpg
1/f/f/1ff82b34a61ae405.jpg
d/5/4/d5432b42685c36d7.jpg
d/d/6/dd6d045097d6746b.jpg
1/5/4/1549f270404c6084.jpg
5/c/8/5c8627bd6665a470.jpg
5/c/4/5c4ec89d32627aea.jpg
6/5/3/653cb3e4389c13a3.jpg
9/e/9/9e98b523e8d1d8c4.jpg
e/2/4/e246e976667c3562.jpg
c/6/2/c621886617a7469b.jpg
d/b/6/db6056e0296c7230.jpg
f/b/c/fbc747b8eb453279.jpg
5/b/e/5bef36f3648a984d.jpg
6/0/e/60ed48663976baf1.jpg
6/7/2/672f7e38e42b47d8.jpg
6/6/7/667ef31072fea8d4.jpg
9/6/5/965fa4237cefccc0.jpg
2/e/d/2eda5a8ebc772184.jpg
e/b/a/ebab7e9d16c84573.jpg
f/9/0/f903a5ae94dc6463.jpg
0/6/5/065f5f0ad998a35f.jpg
e/6/c/e6cd7dceee4d6168.jpg
3/2/b/32b5ffaef815fd8a.jpg
3/a/1/3a1ffdf9c8fcc1c8.jpg
1/3/a/13a1f31a3f0ca1e4.jpg
a/8/c/a8c87a8c6ae55033.jpg
0/b/8/0b840dec619b78e8.jpg
8/0/1/80191615350ac59c.jpg
c/d/8/cd87aa3c8b81b73e.jpg
f/0/8/f0819b7fdca2e941.jpg
5/e/b/5eb55ebe22c40f9c.jpg
8/e/2/8e2177b466457964.jpg
b/c/a/bca2cfa5489ab424.jpg
7/6/6/7665d04ac2d12844.jpg
9/a/6/9a6a264bada1533c.jpg
2/7/0/270a8567e9446f57.jpg
b/7/5/b75c26981607b611.jpg
b/f/6/bf6d41c49da8cb17.jpg
e/9/c/e9c5effa2f703fd3.jpg
0/9/8/0982dcb526f801ec.jpg
2/e/a/2ea6282d51243be5.jpg
a/1/a/a1a7413e235370b1.jpg
8/9/b/89b2950b1e10300a.jpg
3/c/3/3c3ccddfb32d50ae.jpg
0/5/1/05141d65b96adbf9.jpg
e/d/3/ed3da01cef170f82.jpg
9/a/2/9a26c81b53e9b78f.jpg
1/1/2/1128d21767ef8179.jpg
b/a/3/ba3be46c8958c5da.jpg
6/f/e/6fe1e32dd3d5d16e.jpg
6/2/0/6201fe0fc24c3a40.jpg
0/a/2/0a222c56b9ae0119.jpg
0/9/d/09d0dca31eea1385.jpg
d/4/3/d4324da64f80b887.jpg
2/c/1/2c12c516f73babf8.jpg
0/b/8/0b800eff783ad7c6.jpg
c/7/3/c73997a8a0252477.jpg
f/a/f/faf6e763b62a7641.jpg
a/1/a/a1a2b8c42a8cee17.jpg
e/0/9/e099fd73b3546d79.jpg
d/c/b/dcbfe7025334011d.jpg
c/7/d/c7d2f3907e575257.jpg
d/a/e/dae3a08ea7d44055.jpg
9/f/d/9fdad949e2ca6425.jpg
6/2/9/6290cac22bc8bbf9.jpg
a/1/0/a10322683ba59afe.jpg
f/8/8/f88f4968c4ecc004.jpg
1/d/a/1da5d411bc628699.jpg
4/f/5/4f55177637af43d2.jpg
d/7/0/d70aebc6603d988b.jpg
b/4/3/b4342d3ee0294f8d.jpg
5/a/a/5aa702d440c9389a.jpg
d/f/6/df6076a97cdda50c.jpg
8/b/8/8b86c86c0a65c9f7.jpg
2/a/e/2ae7142a63ff3037.jpg
e/3/6/e360a4aca534873e.jpg
9/b/1/9b10d8632b5b9c31.jpg
7/f/1/7f1318ab72d7e699.jpg
1/c/4/1c4dad65e6780279.jpg
1/6/3/163601d6d358c43b.jpg
2/1/e/21e40e0955bcb0db.jpg
2/2/b/22bb50b9157f68a8.jpg
c/d/3/cd37c6ee50ee0208.jpg
4/6/8/468db3a1184ff116.jpg
c/3/f/c3fc606749308416.jpg
4/2/7/427fbd550ddf4c7c.jpg
f/5/a/f5a35e49bd40730f.jpg
8/5/a/85a6d10fb6d240f5.jpg
a/0/1/a016e8e25d453f6b.jpg
5/e/f/5ef981fdf8a623c0.jpg
f/5/3/f537ca0371e7cbb7.jpg
f/f/6/ff6a7d2ac08a6d98.jpg
7/0/1/701190f2eca6ae8b.jpg
4/a/6/4a65ea73e33b053f.jpg
0/5/b/05b0e1c220f80b77.jpg
b/5/f/b5f774fec7aa2602.jpg
2/6/5/2659e28e6202be7e.jpg
4/c/a/4ca3f7815ce4f733.jpg
8/9/f/89fae26cd391f831.jpg
e/e/3/ee31a23ff5a89ed2.jpg
8/a/a/8aa21bb62a078f21.jpg
c/9/d/c9d60d40b7e3d3db.jpg
d/d/e/dde3ce357bcc41e3.jpg
1/b/8/1b8a22691a7bf4d2.jpg
b/2/a/b2a9102c64e815e9.jpg
a/1/e/a1ef9536816d1219.jpg
3/1/c/31c45d99cdefca2b.jpg
8/0/6/806a50bb93a8ea48.jpg
e/a/3/ea3ff63ffb14c52a.jpg
7/4/e/74e3bf54252ced9f.jpg
9/7/3/9730b8179c181449.jpg
5/9/6/596d7c4493416ff8.jpg
8/e/9/8e9d589fdda19e40.jpg
6/e/e/6eeb9c3153e65a5f.jpg
5/b/2/5b2aa9e2669693fd.jpg
5/8/6/58618d3e9805b6ac.jpg
3/a/7/3a71ed4fd205b330.jpg
3/0/e/30e4937fc8f2e1e2.jpg
3/6/3/363cba0cbaa8ac33.jpg
1/b/6/1b690db0da06063d.jpg
b/d/e/bde70cfa7376b2b2.jpg
c/c/7/cc7d61b13532bc69.jpg
e/4/d/e4d55a329fe19264.jpg
4/0/9/409be1b36d72c4b0.jpg
7/2/3/72378ae3e20eb81e.jpg
3/a/2/3a259b536a271270.jpg
a/9/7/a972f66068844958.jpg
5/f/3/5f3e4312e22edc87.jpg
3/4/f/34f001634eaa8b76.jpg
d/c/d/dcd07ef1fd83ffda.jpg
a/5/d/a5d110bb7f96db44.jpg
5/6/3/56399dcde11afeef.jpg
1/b/9/1b9fe15beef10e0b.jpg
c/f/d/cfd5669297a0ae1e.jpg
d/e/8/de870071300296e1.jpg
f/4/c/f4cbcc1103bac3a4.jpg
7/e/7/7e764c149f47e13a.jpg
f/2/f/f2f86afa90648f7f.jpg
f/f/b/ffbaeafc73ab1503.jpg
3/9/c/39cd7046dd1789de.jpg
f/e/0/fe0120c87dc550ea.jpg
5/5/9/5596c50e6a92bfd3.jpg
f/1/e/f1e4e22fa5ad411d.jpg
3/1/6/31671f90c6f7e5fe.jpg
0/2/3/023a3d6e3ef6250b.jpg
8/0/c/80cd4ab912cdd6b8.jpg
9/b/6/9b67c9a3d8ace1cb.jpg
4/e/5/4e5c0d3a14944856.jpg
6/3/0/630491c8bf87164b.jpg
9/4/3/9434588d27287e8a.jpg
2/4/1/2415b5c192d02847.jpg
8/8/1/881220f340f958f7.jpg
a/8/b/a8b1acc9693a2369.jpg
6/6/b/66bf409e97fc82e7.jpg
c/5/6/c566d429a7c71ec6.jpg
e/1/6/e165b500953363d9.jpg
4/5/a/45a64201e7cddd57.jpg
6/4/5/64597414ed561397.jpg
a/d/e/ade1a35222bb14d8.jpg
2/9/5/295719f26c745a2d.jpg
a/4/0/a4041407993427ee.jpg
6/5/d/65dced886408e5df.jpg
e/b/4/eb41a8cff62cf2c2.jpg
b/6/6/b666bb0809bf5d3e.jpg
9/8/3/98307ab29b683b61.jpg
1/7/7/177b7c1fdbbe4bef.jpg
2/0/c/20cdd0cc740a135e.jpg
7/6/c/76c85433dda290b4.jpg
a/d/4/ad4552a0cbab3607.jpg
6/3/7/637eee3352bd02a4.jpg
a/0/1/a01eb8670640b03b.jpg
6/f/2/6f255912b295b83f.jpg
0/9/e/09e9504bc6b1352d.jpg
b/8/c/b8cdbae0389a7b23.jpg
7/d/9/7d9fc24cf5e97105.jpg
f/4/0/f406bdff3f8a95b2.jpg
8/6/4/86466cec49d4c796.jpg
b/2/b/b2b55d3760478fbc.jpg
d/a/c/dac3a5d01a35d0fc.jpg
4/9/2/49288e456235f50d.jpg
7/2/9/7293cffd925b54ce.jpg
0/a/5/0a52e03c3ed16381.jpg
e/2/5/e251b14036ae79f7.jpg
6/8/1/6818e39bf80ae108.jpg
c/1/1/c1120adfb7ecc974.jpg
0/2/c/02cfadb6fbbe2570.jpg
0/2/c/02c02089cda78338.jpg
d/e/a/deab37a3ded9a3d8.jpg
6/4/b/64bd855eff51d334.jpg
8/d/4/8d44640127a75217.jpg
b/5/e/b5ea0ca7ef4e5600.jpg
1/a/3/1a3d8ac4ee9a5216.jpg
9/e/d/9ed90912c72f6c65.jpg
e/5/2/e52227cd6ab91c3c.jpg
8/f/0/8f0038f43637387b.jpg
9/8/4/984007dfa90a9c84.jpg
b/8/a/b8a0c3efc2c7ff5a.jpg
d/a/8/da8c5bb190422e08.jpg
c/f/e/cfe61bda23feb9b1.jpg
0/a/5/0a58b1ff8126828f.jpg
f/d/7/fd7f90981839044a.jpg
e/8/9/e89dc0857519b2c2.jpg
a/1/1/a11067de978b4a06.jpg
4/d/2/4d23334599dd29af.jpg
7/5/a/75a1c2e616d30510.jpg
e/3/3/e334cfc136f71f7d.jpg
0/b/4/0b44787c7b526752.jpg
3/b/a/3bad6ef7b6d5a224.jpg
0/1/b/01b702047eaf0b0d.jpg
3/1/3/313f1b964a1f539f.jpg
3/0/3/303d2f7014c55abb.jpg
2/9/a/29a200e576e82ae6.jpg
9/4/9/949cb1410e17100a.jpg
9/8/c/98c8b328dbfe153e.jpg
a/3/f/a3f7cdea9f4c055e.jpg
7/a/2/7a2121ee68562096.jpg
c/b/b/cbb7a413af7cf9ac.jpg
1/4/7/147955fb0a39f313.jpg
6/5/3/653eeb615fcfe81e.jpg
d/9/3/d9389163fb2db392.jpg
e/c/8/ec8cdb1b754994b3.jpg
8/c/f/8cf9b7f57b3366ef.jpg
a/8/0/a80c8abd8d6489f3.jpg
6/4/4/644b3e2f0e451419.jpg
0/5/f/05f096a4c615a7af.jpg
0/a/b/0ab641a45503a0b6.jpg
0/5/f/05f41f549a772404.jpg
e/5/e/e5e2ca4458d80625.jpg
5/f/4/5f45a5c99634b026.jpg
1/9/0/1900b199af052b0a.jpg
4/9/0/490304df6606517a.jpg
1/7/8/17891a9da0b50b60.jpg
1/4/0/14007e3ea0dd4be2.jpg
9/0/9/90940c2f985fb6aa.jpg
4/f/1/4f1ee35f292a0419.jpg
6/8/c/68c45ddce37d8fc8.jpg
2/4/9/24985c459b4e3cd1.jpg
e/4/8/e481339be1d3be4a.jpg
4/9/4/4948620d381b0fe0.jpg
9/2/b/92b73fdf374cc35b.jpg
3/e/3/3e3d7b17c271f205.jpg
f/1/b/f1ba52a192cd3c55.jpg
9/a/1/9a15caf6bd9307cd.jpg
1/7/c/17c1bcfb331c1bb9.jpg
1/9/5/1957c3276df4dc67.jpg
2/f/5/2f5ade71548d9483.jpg
6/5/2/652a6b6dfe83404d.jpg
3/f/f/3ff0f5c9ec37ff7a.jpg
9/8/8/98883dfacf421110.jpg
1/c/6/1c6883a214392a53.jpg
1/9/e/19e618b1999cc769.jpg
4/2/6/426b44bd574b0ba2.jpg
d/1/7/d176be87a15eb38f.jpg
b/0/6/b0606d4e288095d4.jpg
b/4/5/b45cda1a6e2e0547.jpg
9/e/1/9e1061db1d22ac60.jpg
b/7/e/b7e1877ad69816ff.jpg
0/4/5/045b93afbe769e19.jpg
1/c/1/1c124031570c7d93.jpg
f/6/e/f6e974f370c8fd11.jpg
e/1/1/e112957ddd95de3c.jpg
a/e/3/ae336c34ad82199d.jpg
e/c/c/ecc92cf53cf42527.jpg
d/e/4/de4cc00aa59551c7.jpg
4/7/f/47f5e3f3a6916927.jpg
4/2/3/423cef8c83d2d3b4.jpg
b/a/2/ba2ba34a38b4b21f.jpg
6/f/2/6f2a571e1a10798f.jpg
2/2/6/226ca432dbb73cb0.jpg
f/e/f/fef0d3647c0302f7.jpg
5/0/c/50cd501fe8e8e4c5.jpg
0/8/8/0883f2cc2bba7da1.jpg
6/a/e/6aeb48bf64b1b373.jpg
4/3/9/439a6b9344a5cc42.jpg
8/c/d/8cd8b98c500771da.jpg
2/5/6/256ea24724008efb.jpg
a/4/f/a4fd94f6b6f392b9.jpg
d/e/b/deb75fed11192f42.jpg
e/0/1/e01ca11295a5617f.jpg
c/6/6/c66303b68efeba68.jpg
6/1/4/61493b016859bdf6.jpg
e/0/e/e0ed3658d09a9d36.jpg
3/8/9/3894127a3903e81f.jpg
8/4/5/84584727d62886ce.jpg
6/7/0/670a65bf0de889da.jpg
8/5/4/8543bd1bcdfbb728.jpg
0/e/e/0eef95091aac5916.jpg
d/4/9/d49c4fb232ab0e35.jpg
b/f/4/bf4fe14d8cde9e7e.jpg
4/f/b/4fb9d180c190d8d0.jpg
e/b/b/ebb58bbe2768239b.jpg
8/4/4/844c284fc5422aac.jpg
5/a/e/5aea37853232d65c.jpg
9/c/0/9c0f4af317a36cb5.jpg
9/3/3/93333a8af2ccfea0.jpg
0/8/2/0828d4ca29438f81.jpg
3/1/c/31cd158a2492f0a0.jpg
7/4/c/74c136b4506cadd6.jpg
d/9/3/d9346605cbdc498c.jpg
e/f/c/efc1a39e953bca75.jpg
b/6/5/b651d871e96d79b4.jpg
9/5/3/953b1667134cc9a4.jpg
2/6/d/26dbdf72751d767a.jpg
8/1/0/8107d0637e3d27b2.jpg
e/f/0/ef0195d019819bdb.jpg
c/c/a/ccad879bb69266cd.jpg
f/9/5/f9501a3bdbfbaf2c.jpg
5/2/0/520153602d6004be.jpg
0/c/4/0c4401797f0468bd.jpg
3/0/6/306514d9a950cb67.jpg
2/9/a/29a9acfae91f88f6.jpg
4/8/3/4836ef52b3ecb3a8.jpg
b/b/5/bb5a6a4125d5eb79.jpg
0/b/5/0b5ab7e06b91a733.jpg
d/1/2/d122b2f844ab6848.jpg
8/0/d/80d4776ee2d4baa4.jpg
8/f/8/8f8ee5d30b296629.jpg
0/1/7/01757294e66d5e6f.jpg
3/a/a/3aa4228da38120b1.jpg
e/2/6/e2663b8591f4c75a.jpg
7/9/c/79c04ba754be4e0c.jpg
a/8/6/a86939037a5a1e94.jpg
3/0/5/3059464c2b7a41bf.jpg
b/9/1/b91a5b24b11ca23f.jpg
f/a/0/fa02034b66d63795.jpg
0/f/0/0f0aae33dc5bc6cf.jpg
4/f/b/4fb533862484ce73.jpg
1/3/1/13160a04e30f75af.jpg
d/f/8/df8adedacdc73335.jpg
8/5/f/85f8f35a51254c8f.jpg
d/4/4/d4410530f0518a40.jpg
f/6/4/f64d34bf36572460.jpg
4/1/a/41a7c36fcbdf6445.jpg
9/9/3/9934ddb53bdeed41.jpg
0/b/1/0b10733acacb23c9.jpg
0/7/4/074f69aace2ffbfa.jpg
e/1/b/e1b6cd412c6d5448.jpg
5/3/d/53db040c8059f602.jpg
2/7/4/2743b11d12d4678a.jpg
5/7/6/576bf3364a6c54cc.jpg
8/9/8/898f2ccc476b1431.jpg
b/4/2/b42e93e43bc5aeae.jpg
e/f/d/efd75b303b0ecd1a.jpg
b/1/8/b18b348363c1c9b1.jpg
f/c/7/fc79709ba41cc1eb.jpg
f/e/f/fefdfb55c346b0db.jpg
f/4/9/f49393ef50e87366.jpg
5/e/0/5e0ebe1c3d946592.jpg
f/8/f/f8f76a263c738a2c.jpg
a/3/b/a3b0de7f3429a76c.jpg
7/a/4/7a48c537a1e95811.jpg
a/9/4/a94e3df8b959ba9f.jpg
c/c/d/ccdd863e38cf6411.jpg
b/b/a/bba5dd78780bdb69.jpg
b/1/e/b1e2c7d96013bc6a.jpg
8/8/e/88ee2dd1de97ddfc.jpg
7/1/0/7100cde2355c14f2.jpg
2/2/5/225ae161e9244cad.jpg
1/c/3/1c3c6412f64036dc.jpg
2/b/4/2b46879355c1a4d8.jpg
1/a/c/1acf1b9a60c7ec30.jpg
c/f/c/cfc3fc989218b4e7.jpg
8/d/1/8d1718380a83fbc7.jpg
f/d/2/fd2245ed327de8a6.jpg
6/1/6/616d683e9c3139ec.jpg
d/a/c/dac693bcb52e5ace.jpg
a/7/2/a723fc99e86376c6.jpg
c/2/b/c2bbcca52ad21d7f.jpg
2/2/3/223ccd29949f4099.jpg
0/0/3/0039efa1e69429cf.jpg
3/1/8/3183e535b9602e92.jpg
c/c/d/ccd21857947af71b.jpg
7/6/d/76d71f458e2e0c00.jpg
3/3/6/336c4cd592c8d7a8.jpg
e/8/2/e82118ed2bdd0d65.jpg
7/e/b/7eb263f341bfc3f5.jpg
9/e/0/9e0e47e6467c1654.jpg
4/4/7/4470d44761c3fddf.jpg
c/5/2/c52113036efdfa37.jpg
9/e/6/9e655e48b8523a68.jpg
6/a/2/6a219cd2e4f3ca85.jpg
7/2/0/7206ef90088365f8.jpg
f/0/a/f0a50ba770e8280d.jpg
3/b/6/3b67e226fe65f048.jpg
b/c/9/bc955419c2584942.jpg
0/f/5/0f564e5070e4b4e4.jpg
c/a/4/ca4409cbe67f0aab.jpg
c/1/0/c109e1d4be5dd177.jpg
a/d/3/ad331c2080887c54.jpg
1/a/b/1ab63d706c6ea556.jpg
0/4/f/04fa22ea7d8e5466.jpg
9/9/c/99c9eaea76b9b9b9.jpg
8/d/4/8d43d16e737542c5.jpg
9/7/7/9770c4920c745994.jpg
a/8/9/a894a8db96d21c91.jpg
6/1/9/619af2019fd0cb2b.jpg
a/9/7/a972302d3556d5a0.jpg
8/a/6/8a6b65de4c7507ad.jpg
f/3/6/f3695e74ba080710.jpg
b/5/d/b5dc2be52f82e48d.jpg
e/8/7/e873b48cf80688a2.jpg
c/2/3/c23b2fe5a86bbd9c.jpg
5/7/0/570b6e0b8d014f05.jpg
6/1/8/618723810a6885d5.jpg
7/d/d/7ddd2fc242b83d0a.jpg
e/8/e/e8eab3b4207bcf48.jpg
1/2/6/126b5b63f400949e.jpg
a/0/b/a0bb7aca099bfbdb.jpg
e/e/a/eea8e12417f00d8c.jpg
f/3/3/f33610b2f015185b.jpg
6/0/5/605d34bc1571f909.jpg
d/7/e/d7e648b5e5ae40b1.jpg
2/c/c/2cc9268f4699062c.jpg
1/6/5/1653a393c19c9555.jpg
7/5/4/7546afa7fd989373.jpg
5/a/f/5af7088a98e90b30.jpg
0/1/6/016597af071541c9.jpg
b/6/5/b657bcc32090e9c5.jpg
a/5/8/a585ed280e1f01c6.jpg
b/5/e/b5e165d064cf59fb.jpg
6/1/b/61b6ecfb6eaafae0.jpg
2/9/9/29914896acf74e88.jpg
4/1/1/411c3ea9b60c0f16.jpg
f/f/c/ffc4e72e74a8f178.jpg
2/8/e/28e3bb973405ad29.jpg
d/6/7/d679288ab748771d.jpg
5/a/1/5a1095311afbfe66.jpg
9/a/f/9af3f19b37356b45.jpg
c/d/f/cdf7377aa2378918.jpg
a/5/8/a5826a5a4d1e8055.jpg
1/8/a/18ad0786103739e2.jpg
e/f/4/ef48950f195a3765.jpg
3/2/a/32ae7063888be86b.jpg
b/e/3/be317eb366af02c8.jpg
1/8/b/18b9894bb5f82db8.jpg
a/a/4/aa41171f3e19209c.jpg
4/4/1/441dc5d144ea8cfa.jpg
6/2/4/624c11206f875782.jpg
d/5/e/d5ec9e217a431579.jpg
d/6/e/d6e32c99693d03fb.jpg
b/7/f/b7faa10ad4e73588.jpg
2/4/d/24d7c1b58970f534.jpg
4/d/2/4d2e2e0976fa6ac8.jpg
8/a/0/8a0d8afec38c8a3c.jpg
a/4/8/a48e91f629dcdadd.jpg
b/3/8/b3856ce8caaa4271.jpg
6/7/3/67390ae2445e8e70.jpg
3/a/e/3ae7dd6c05f90d09.jpg
e/d/9/ed9ab2351bec34c6.jpg
4/a/9/4a9262af25d442ff.jpg
3/7/d/37db5271ba37e68e.jpg
9/8/2/9829e180147a5e02.jpg
8/c/8/8c8a77edc758be49.jpg
7/b/c/7bcab490f7509681.jpg
e/5/d/e5da0d6526794846.jpg
6/b/a/6baf00fdce349b84.jpg
7/a/3/7a37dc2261a80bd2.jpg
8/5/8/858d435d466ff4ac.jpg
e/5/b/e5b97b0920273f92.jpg
a/0/0/a00d714cd681b718.jpg
8/8/a/88a0f87d9f8a08fb.jpg
a/b/5/ab54325e2c339284.jpg
6/a/9/6a9e8b1f862fb598.jpg
1/e/6/1e61981b67d3a4c9.jpg
5/3/3/5338280c457b7c30.jpg
c/0/5/c0519187ceaa0d30.jpg
0/e/2/0e2fe6713532d1e2.jpg
9/7/b/97b9368047bf13ab.jpg
c/2/0/c20c343abb006f2e.jpg
1/f/f/1ffe6722f3afa1a4.jpg
9/0/3/9035fc14759bff93.jpg
6/3/9/63968a63af3869be.jpg
5/a/f/5afe736ad3f7a230.jpg
4/4/f/44fa5315782e44f1.jpg
6/6/5/665890e66a27eed2.jpg
7/c/3/7c3d282b39f56d06.jpg
e/c/3/ec39d2def42abd62.jpg
a/7/e/a7ed9a0f21532a73.jpg
f/c/f/fcf842ed2359ddd2.jpg
1/9/1/1915297e9ea77d37.jpg
f/9/c/f9c1baab7702c33f.jpg
3/5/1/351c4823cc1e0f03.jpg
8/a/c/8ac39cddba02a3b5.jpg
0/c/c/0ccb9edea1bcf259.jpg
1/3/e/13e1ebb316ceae9a.jpg
f/3/5/f35142e55c35763d.jpg
a/a/0/aa09501c732ffe14.jpg
8/9/1/891a7990e1c6cde8.jpg
b/1/0/b10e6854b4a8c7ab.jpg
2/9/7/297da404dbd5c411.jpg
4/0/b/40b1a1506ec30a82.jpg
7/e/3/7e3d9f5f74f81994.jpg
0/7/c/07c71f94c7d56374.jpg
f/d/1/fd1399ecd731ad93.jpg
0/c/8/0c80a09013cccd6d.jpg
2/7/f/27f2ad80ba4e22e8.jpg
6/3/8/638de6dac70f5c0f.jpg
5/3/e/53efd94891ed1bad.jpg
0/0/1/0018fe2ebe2fa5a5.jpg
4/3/6/436a80d1c14e4926.jpg
b/0/9/b09f6c58fdb20999.jpg
b/1/5/b153ba997f7a6acb.jpg
0/d/f/0dfdb34661461955.jpg
6/e/7/6e78187328854bb3.jpg
c/2/a/c2a60c626a0d421b.jpg
8/f/2/8f2cb0849a551f83.jpg
c/5/b/c5bf1cae216f5a7d.jpg
d/f/b/dfb9cdd9b8fade43.jpg
1/5/f/15f66889114bad29.jpg
c/b/3/cb394f5cfc42d106.jpg
d/f/0/df0cf7a0e1594891.jpg
3/5/7/3572def8874b9d7d.jpg
9/1/5/91578b6c5e0da9b1.jpg
b/4/0/b4063504271a7f14.jpg
4/d/f/4dfd72ba4ea856ae.jpg
f/d/4/fd4826448398d03a.jpg
3/8/5/38501d3b0c3e3360.jpg
c/8/a/c8a590098a4cd67c.jpg
6/9/e/69efab5663001119.jpg
c/8/d/c8d89657a0fd2e0f.jpg
0/c/f/0cf969bc4ed1221e.jpg
6/d/c/6dc66ed937aeb295.jpg
1/6/d/16dd35f42db51a3f.jpg
9/a/5/9a5d48a6c57a4fc5.jpg
7/a/4/7a4931eceef287cb.jpg
1/f/d/1fd7dfc11f3adf57.jpg
a/a/0/aa0563b148ffed33.jpg
7/a/7/7a7dd69aa803e855.jpg
d/c/f/dcf1d16e9ecd88b0.jpg
7/8/1/78188e3c9e0bdb87.jpg
a/6/c/a6c09d57d06d3388.jpg
b/7/1/b711485188ffc164.jpg
9/8/d/98d386af2f2922c8.jpg
9/e/7/9e7b072e241f367c.jpg
6/4/3/6432d6b3e50241ed.jpg
1/1/7/1175f6cafecbc804.jpg
5/d/7/5d7349a5ffd0054b.jpg
d/f/a/dfabe6c490c9346d.jpg
6/1/1/611f803bfaa1f5f4.jpg
1/9/2/1923f8c89db5a18d.jpg
2/6/d/26da65420bb56e16.jpg
3/3/5/335b13f28de6d037.jpg
6/e/6/6e608101460e53f6.jpg
e/2/2/e22934cc0faf892d.jpg
5/5/8/558298633c554856.jpg
8/4/1/841439b1b313f319.jpg
6/c/2/6c29ff74771f9419.jpg
a/8/3/a8370bfaafac8dad.jpg
c/a/f/cafe2fed023bfe10.jpg
a/f/0/af0338ce3d8bb6a2.jpg
3/b/1/3b1fbce2ce234413.jpg
5/5/e/55ec8622f84e0842.jpg
1/0/2/1024018041ede956.jpg
0/a/2/0a2264ab16d42914.jpg
0/8/7/0875ebe917e5ad08.jpg
7/a/6/7a67e40e5f2b9ef7.jpg
6/a/3/6a3b9c2d4170645d.jpg
a/2/5/a256619b055ad91b.jpg
9/6/b/96bbae2651aea4ec.jpg
c/4/c/c4cf67808dde6108.jpg
3/8/f/38fcb31f5f631841.jpg
4/3/9/439952637de84bd8.jpg
d/3/a/d3a6567475760a7b.jpg
d/9/e/d9e1b3c46414ddba.jpg
5/4/1/54145b6c668f76c5.jpg
0/3/e/03e83fc54f684c27.jpg
4/a/a/4aae587b6ac83f19.jpg
f/9/d/f9d3c390d16b6530.jpg
3/6/4/36468d599d37d43b.jpg
e/f/5/ef597e6a44aa1bd4.jpg
f/9/a/f9a6a02f0d450369.jpg
f/8/7/f87f821d6004d387.jpg
5/e/d/5eddfaea1243495c.jpg
0/0/c/00c699d870b868f7.jpg
f/0/0/f00e3de8502ac175.jpg
6/2/3/62307653bac14b77.jpg
0/c/0/0c0fc8bb52bc6e87.jpg
4/b/6/4b6ad93910699dc7.jpg
c/e/d/ced994cfdbfc8c04.jpg
1/6/4/1641915706c8f6fb.jpg
0/e/8/0e8d9e39716c54b4.jpg
5/1/d/51dcd97287694ecf.jpg
b/4/b/b4b6de492e795724.jpg
f/1/b/f1b6a2aca8f8aa8b.jpg
3/2/1/321b8d94bac02991.jpg
c/3/6/c3632d4bd04baa4a.jpg
0/5/4/05498c0a48e7a94c.jpg
4/3/a/43a172e6319d65bb.jpg
6/8/0/6806cc1109cea823.jpg
e/6/5/e65cc7f83f381e9c.jpg
3/2/e/32e90b3bed668993.jpg
8/8/a/88a36df11f7d6e6c.jpg
e/1/3/e13245a00345115f.jpg
7/5/f/75f1292e533f3f86.jpg
d/b/2/db2e23503cefcc75.jpg
f/a/9/fa9b5392412843e3.jpg
c/9/0/c901beb679635772.jpg
e/e/6/ee6c642468ebdb7e.jpg
d/3/8/d3840d63063e1f6f.jpg
0/4/b/04b733b5c20de784.jpg
5/b/d/5bd04ac3d63509aa.jpg
1/f/c/1fc6ef2a5a25c90b.jpg
8/6/7/867b508dcf762cc2.jpg
e/9/d/e9d2152332117f98.jpg
8/1/d/81d4211848a3b334.jpg
1/c/9/1c91ae05f78e71fe.jpg
2/a/f/2afaf4c41da4ec6a.jpg
6/1/e/61e79ba9d7057fc3.jpg
2/0/8/20830fc1b2e833bb.jpg
0/2/6/026a3ad7cd78ab21.jpg
2/5/6/2565c13be2be259a.jpg
5/8/b/58be2747fd24e43b.jpg
c/d/5/cd543a33d57c4c05.jpg
7/6/5/765473f37c713eed.jpg
7/6/b/76bebd083d6c7ea1.jpg
b/4/2/b427e70e00450ce8.jpg
2/2/5/225a6004c52dd393.jpg
2/d/4/2d48047cc2a88624.jpg
d/6/4/d644263614ffee75.jpg
1/4/e/14eb23893878d720.jpg
e/a/d/eadeb40aeca76fe1.jpg
3/b/3/3b3e96da56fad6d8.jpg
e/3/f/e3f9428dfdd05de9.jpg
2/f/a/2faaf52c8143e43a.jpg
7/1/3/71318b995fc683f4.jpg
f/7/3/f7398808405f96c3.jpg
c/2/b/c2bf81b9a188f9a1.jpg
a/a/a/aaa85ba951013a42.jpg
a/c/a/aca068e221badfc1.jpg
e/c/5/ec57cc5fd00e28aa.jpg
a/9/5/a95b381b1e2968d5.jpg
6/0/0/6000ed8beade7cde.jpg
e/4/8/e48cdf15511d686b.jpg
a/3/2/a327701d87a22dd4.jpg
1/3/3/13390e7aaa865387.jpg
f/a/b/fabe0b993cd82224.jpg
0/7/6/076ee629975847ca.jpg
1/5/0/150a06979c4ac637.jpg
a/c/2/ac2eee2cb1416357.jpg
b/8/8/b88456a934ad228f.jpg
f/c/e/fceeeab18b4ef0a9.jpg
7/e/c/7eccaf427ffecf4b.jpg
e/3/8/e38af32a7dee08ac.jpg
b/0/a/b0aef108f4e0f04f.jpg
d/6/8/d683f2857e636d8c.jpg
d/2/d/d2da33c851659b70.jpg
c/e/e/cee82a30f111583b.jpg
c/e/a/cea7656e1b013b23.jpg
2/7/1/2711acc6ff266c87.jpg
f/7/f/f7f4108f2b542a4e.jpg
6/3/a/63aa09338dfa4114.jpg
2/1/7/217d22c07e5ae737.jpg
b/9/d/b9daa75e873bcc00.jpg
7/7/f/77fd1c7c17d7b32c.jpg
8/1/6/81600651e783ea56.jpg
8/e/b/8eb2cacdbeeccc70.jpg
0/1/a/01a93ef23719dc63.jpg
b/c/c/bccc47b4097dfc64.jpg
d/f/7/df7e5a6c9b3b9f68.jpg
c/6/b/c6bb3e2ddef35f8e.jpg
e/b/a/eba1e87796e8faa3.jpg
8/8/7/887248563c1bdd6f.jpg
e/3/9/e398862e910bef97.jpg
4/1/c/41cadf2276e83c1d.jpg
4/0/7/40741c4fc4307f89.jpg
7/9/e/79ea09e6101023b3.jpg
e/e/2/ee27abcda07e25b3.jpg
8/c/9/8c93ce2d84631ce4.jpg
0/9/d/09d83b581062321b.jpg
2/f/5/2f5a4d94a390b2ad.jpg
e/4/1/e411876a1e7949af.jpg
f/1/2/f121cce5363c3103.jpg
0/c/5/0c59c76a5bc09790.jpg
7/c/0/7c04a84a8195fd2c.jpg
b/4/f/b4f3320e684b218a.jpg
2/7/e/27e03f7d8048d298.jpg
f/2/6/f26889303b6a05ae.jpg
7/1/f/71f7cf4334e45f9f.jpg
6/4/0/6406c227e044829e.jpg
6/9/6/696392dbd9b86424.jpg
0/5/4/05486acf28b2527f.jpg
5/6/1/5619fc68ebf1f876.jpg
a/6/9/a697f02224d7df0b.jpg
3/1/4/3140cb8e0776d3e1.jpg
9/4/4/944380141ec6c3ea.jpg
9/4/e/94e7073209f8f1ba.jpg
b/4/7/b477427558db8a61.jpg
f/d/3/fd36b29148b6f145.jpg
3/d/5/3d5e3d09e7c67fe3.jpg
a/9/1/a9104981cb07b98d.jpg
1/d/6/1d6808094c53fa23.jpg
9/4/2/942b43ea67661ed1.jpg
b/7/d/b7d4dc87dcc98b5b.jpg
0/3/3/0334a73f8eadcf2d.jpg
0/d/3/0d3c9c0c74d4164a.jpg
e/5/2/e529d4547b0bab14.jpg
c/0/7/c07183de2b471cb7.jpg
5/6/2/5622c78f7d08a09a.jpg
2/e/d/2ed6489ec0367440.jpg
1/d/e/1de0278a8a876f78.jpg
7/0/d/70df488dc8344a64.jpg
3/a/c/3acd2397dc301d53.jpg
a/0/3/a031d1b73d9fd4dd.jpg
8/0/2/802747670d249192.jpg
0/4/7/047f95680179e1d8.jpg
9/f/c/9fce4e66bb0daed8.jpg
c/1/e/c1e997eb57ce8f56.jpg
5/4/9/549652495ea313a7.jpg
7/8/2/7823c34bcb0b4018.jpg
4/4/f/44fc76ea4ad2bdd8.jpg
1/9/3/1937b2bebcf87823.jpg
1/2/1/1218cbce6d3028a1.jpg
a/9/3/a93ceb4051e32bb5.jpg
3/9/3/393636060166fe56.jpg
0/6/8/068218df11f4db2b.jpg
1/d/3/1d36b49c4dc8ea92.jpg
8/c/b/8cb9b8edb9bad9b2.jpg
5/8/3/583d13df880c9d16.jpg
c/c/9/cc93cda141d74d94.jpg
a/4/3/a430183fa6e1e8a3.jpg
e/8/d/e8d608a93acd3770.jpg
c/a/7/ca7c2efebf58e10c.jpg
8/e/e/8ee7653230bb8d2f.jpg
b/9/a/b9aae38932d6d620.jpg
3/a/f/3aff79b1a8aa7985.jpg
5/6/7/567afc3b15d585dc.jpg
7/b/2/7b295d42da9acf23.jpg
a/7/a/a7a9e7a417026b46.jpg
2/0/5/2057fae9df20d96c.jpg
4/5/1/4514b488ede58c35.jpg
a/6/3/a63abd7f56f34bf0.jpg
9/6/9/9693ad18acf1f08e.jpg
b/0/1/b0115245c90c7802.jpg
4/6/0/46084d02d3b225f0.jpg
8/c/8/8c8de1975022c982.jpg
1/a/7/1a73003588cf746d.jpg
7/8/8/788d5cad42eea667.jpg
0/b/5/0b59e1df292be1ef.jpg
3/0/2/302469c71d8703f2.jpg
c/b/c/cbc1b381ffb83a1f.jpg
f/3/6/f36e19be48d93c78.jpg
e/9/6/e96a2c395dc63b62.jpg
0/7/2/0726fcd5b271ef76.jpg
d/0/0/d00db9f170739e7c.jpg
f/6/7/f67333ea1db52957.jpg
5/7/4/5747da931d550cdf.jpg
0/d/8/0d8e383e287016c6.jpg
a/5/a/a5a76febfc5010be.jpg
d/0/4/d042008b7477c03b.jpg
f/0/b/f0b62ad4394f5ec1.jpg
4/2/1/4215eeb2c0828d06.jpg
a/f/b/afb64cb5c8abedc7.jpg
f/7/a/f7a1d9e3dc0fe591.jpg
c/5/e/c5e4858ead3051bd.jpg
7/7/9/7799897a3d73dba2.jpg
2/4/b/24bbf4a43bbadad6.jpg
7/5/3/753d33b6a67512c4.jpg
3/c/e/3ceef78ec4d80b03.jpg
9/f/3/9f3190486ae37d9e.jpg
1/c/c/1ccd6ad9bd4e61d5.jpg
d/8/4/d84147906dd20909.jpg
4/4/d/44d783be97c7b22d.jpg
3/1/e/31efe5b1aab9e8ae.jpg
6/0/0/600eb9a4254b4934.jpg
c/8/b/c8b519a03bc35988.jpg
7/4/0/74080dd2c51af251.jpg
7/c/b/7cb4c6e4fabfe83a.jpg
6/1/9/619bfe7ac2f0e5fe.jpg
d/2/6/d2622611cfb5ecc8.jpg
f/2/c/f2c0fa87d88ff36f.jpg
b/2/3/b23663a6c0ec9f8c.jpg
e/1/5/e1557e9b0641ee1c.jpg
5/6/d/56d11cee027ed396.jpg
b/2/4/b244d2839191d3b3.jpg
d/c/5/dc54fe742fd8e621.jpg
d/0/1/d01a4cdb71f09db6.jpg
4/a/2/4a24b2883b74827f.jpg
9/c/f/9cf8b2be05b9ec28.jpg
c/c/c/ccc3046239d0e54a.jpg
d/5/2/d52092edc84e5e53.jpg
c/7/8/c782d5352973fcb0.jpg
c/6/f/c6f05e62bb2af52f.jpg
b/2/8/b2861e2128c8a3c8.jpg
7/0/5/705bf82618351f47.jpg
b/d/6/bd668ec393a46de5.jpg
1/1/8/118fc726f8d50a93.jpg
7/9/3/793454a0d970caa1.jpg
c/7/2/c7274a19fe84f1f3.jpg
3/8/d/38db92ab830e8b66.jpg
1/7/9/17999a61a6b222a5.jpg
d/9/1/d9108e3054c4a4a8.jpg
2/a/9/2a93bec1b9b0274b.jpg
6/c/7/6c798f8c0dc2f978.jpg
7/4/0/740a147536c48a46.jpg
9/7/f/97fb445991ea4bf2.jpg
2/e/7/2e7c5fb23d64b71b.jpg
8/d/8/8d89004c32a47f5c.jpg
4/2/2/42262897ab7be22d.jpg
5/7/8/578eecb7f1b4c069.jpg
1/e/c/1ec3253bc951a367.jpg
6/7/5/675ca4a12a1a0c9e.jpg
3/a/3/3a3057ce378bc274.jpg
0/0/1/001f1643a49b8107.jpg
a/d/d/add0d16d6875e888.jpg
8/0/b/80b2fb736f5e2de9.jpg
7/0/8/70895c3dbf7e20f0.jpg
b/8/e/b8e5581384e30cb1.jpg
7/2/4/72475cd1e666041e.jpg
6/9/c/69c9a69d7ea4037a.jpg
c/6/4/c64e19a7a7b2e7bf.jpg
2/c/2/2c2d4aa6d99eaace.jpg
5/a/c/5ac3ec80045c7c55.jpg
8/3/6/8361c3483b2bc901.jpg
6/1/e/61e16776a2137431.jpg
a/d/6/ad68979f9247707c.jpg
5/5/8/5588ff66ae80f733.jpg
b/e/4/be40efe7308d442e.jpg
f/c/b/fcb961a159bd9848.jpg
9/a/e/9ae33eeb278a5450.jpg
7/e/2/7e223181c2e026b1.jpg
1/a/e/1aeb64594610e20d.jpg
d/7/4/d747ed67f10b3618.jpg
7/5/6/756c7f737aa1c647.jpg
3/4/f/34fc1c2785e952bf.jpg
f/8/4/f84128f20accb62b.jpg
0/e/9/0e913d2bb28c5a19.jpg
6/3/7/6373bb82288438ec.jpg
0/e/5/0e59d720f6aa543e.jpg
3/1/7/317de86996f51dd5.jpg
0/3/4/0341d49367c4ca47.jpg
c/2/b/c2b8f8ae09f0abac.jpg
e/b/9/eb90132078eeb179.jpg
f/e/4/fe4ab1edc6a5518c.jpg
9/a/f/9aff1c42e81a67d7.jpg
6/4/2/64238a85c9943089.jpg
3/5/e/35e2b1f48d53e156.jpg
a/9/9/a99016b89c25f24a.jpg
1/8/5/18555ab3b5eac429.jpg
3/a/5/3a50e959dae645f1.jpg
0/e/f/0ef28dff552998cf.jpg
8/0/8/808c0b9829a25992.jpg
4/9/6/4968930204edd0e6.jpg
7/6/f/76fa54784b34c54d.jpg
6/8/e/68eb5cf6644e44bb.jpg
b/5/2/b52b5b89121701c5.jpg
6/0/3/60348686aaaefaad.jpg
e/d/4/ed4e2daf447155a3.jpg
0/5/1/05148f4c9bf3140e.jpg
e/0/9/e098a7dfe440652f.jpg
2/7/1/271ca45c8c172ac1.jpg
5/a/7/5a72279288aaaf9e.jpg
c/8/8/c8897bfb6454bf40.jpg
6/2/5/625deaa37dbe1225.jpg
e/b/b/ebb2ec60d27b58a4.jpg
3/8/8/388ce6f25f9d15f2.jpg
7/2/a/72a23a5d3c1fd322.jpg
a/0/7/a07499712a62d7be.jpg
e/8/e/e8e815f1c5cb7d5d.jpg
4/a/3/4a3319b4fbfa0963.jpg
4/e/1/4e119227dd8dd7fb.jpg
b/a/4/ba437b3f473b6cd0.jpg
e/5/1/e518b05d59dcfdc9.jpg
e/8/6/e86e5b1ac017b1e7.jpg
f/b/5/fb56901a2e14fbe0.jpg
6/8/3/68331ce8faf6e0c6.jpg
b/a/f/bafdea25e090d58f.jpg
e/6/b/e6baa57a688bdc81.jpg
4/b/0/4b0c554380d0ba49.jpg
a/b/d/abd7a693ceb05061.jpg
b/9/f/b9faebacf69d4fc7.jpg
f/e/e/fee7183e2b542e79.jpg
b/7/4/b747d99381c0f635.jpg
b/3/7/b37c49ad7bdc8954.jpg
3/e/7/3e7219afb5bce310.jpg
f/b/3/fb372de0aff2a824.jpg
7/0/f/70f1d84ae5343334.jpg
9/4/1/94185b4eb5f720c3.jpg
7/4/a/74a9090eecd4a5ff.jpg
b/1/2/b12dce727b8577ce.jpg
b/7/c/b7c8d6e87ad50da6.jpg
e/b/f/ebf4400efc171d8c.jpg
3/2/3/323478cbad1a04f6.jpg
2/3/f/23fbafec0e45adbd.jpg
5/9/7/597f3a975d621b90.jpg
1/5/a/15a658feed220d8e.jpg
a/3/1/a31224e482923d48.jpg
e/e/c/eec3b10423d607dd.jpg
8/a/6/8a6daf0a34d3e1a1.jpg
f/0/b/f0b4dc48d53055a9.jpg
d/a/e/dae2f4c9981095b1.jpg
5/5/e/55e08937625f477a.jpg
3/5/8/35874b2c05703bf6.jpg
8/c/e/8cec4f34690927c6.jpg
8/c/2/8c25dffdfde80ba7.jpg
a/f/f/aff5d9de13b7925c.jpg
1/7/5/175be38236df325e.jpg
7/f/6/7f61dbb0daa25dc6.jpg
4/8/7/4875017f66a9af95.jpg
a/c/9/ac9a96ad908f6321.jpg
0/a/0/0a093d18ce2c3de3.jpg
7/7/d/77d29159618fb175.jpg
9/b/6/9b60953638c3b0bd.jpg
5/9/5/595ec7b8ef397924.jpg
7/2/2/722cfa9ab19dcf51.jpg
a/d/0/ad081750bb04edd0.jpg
e/2/d/e2d8e572a965a411.jpg
d/4/9/d493cfff9f84bd09.jpg
a/1/d/a1dcf393b6d1d1d7.jpg
5/2/4/524d987f841530f7.jpg
e/0/f/e0fe30569f3f2781.jpg
5/1/4/51467d2ba399f269.jpg
b/1/2/b12f3f7a6f962cab.jpg
b/2/5/b258da49ff283100.jpg
3/b/7/3b760890f3a1d3fe.jpg
e/3/9/e39040f433568572.jpg
f/c/7/fc7f91eebed3e6e4.jpg
a/3/4/a34f5f43ff801162.jpg
c/9/5/c956efad5d11cf5d.jpg
a/7/4/a743bd16709d05e0.jpg
c/5/2/c5219e6fce436c2a.jpg
2/b/f/2bf7bf827a07b2f7.jpg
2/7/e/27e050cb58f3c6f3.jpg
4/e/3/4e37e8afeff5cc0a.jpg
6/3/c/63c4525ab3b50a44.jpg
8/4/6/8465fcc9e2dbe3cd.jpg
3/b/d/3bdb8d45daeb142a.jpg
e/8/e/e8e9ddb050976a79.jpg
d/8/d/d8dd70947ccfcbed.jpg
6/9/1/691cf81c5188fc30.jpg
e/d/6/ed617175351f8ee3.jpg
5/c/b/5cbb9d17aa0386d8.jpg
7/2/0/7201b9e404da81aa.jpg
a/1/b/a1b7104e45677f29.jpg
4/5/3/453d78c4f3b6502f.jpg
0/c/e/0ceb31ef667b0742.jpg
4/4/1/441037ac4587809f.jpg
b/d/a/bda8360c7b46f9c8.jpg
f/4/4/f441772ab8e1e4ce.jpg
b/c/0/bc0b5f20e0e5bed9.jpg
d/a/b/dab46695f0b6152f.jpg
1/4/0/140a938de96af405.jpg
4/a/4/4a42bd71f6e8407a.jpg
c/7/7/c770088cfcf5108a.jpg
f/1/8/f181f7919034de8c.jpg
9/f/c/9fc4cb4d1ba89535.jpg
a/c/7/ac72f4af3f0e0c40.jpg
0/2/7/027d3dc36222fe9c.jpg
9/9/7/99791df73ee60802.jpg
9/e/e/9eed674fb5440d6d.jpg
8/b/f/8bf55f4253135192.jpg
2/3/3/233dafebcd836bb2.jpg
4/0/b/40b9192bb03012bf.jpg
5/a/e/5ae3bdf8f26d9261.jpg
6/9/3/693342178a24d2bb.jpg
0/d/a/0da9e06264e68ce5.jpg
f/2/9/f2948ce4508d88e5.jpg
9/9/1/99195b0e98c7908a.jpg
d/f/0/df0861d7a9331325.jpg
1/d/9/1d946e0823aeb6d5.jpg
e/1/e/e1e8575e24a65ebe.jpg
e/f/3/ef3240c68815671b.jpg
4/6/2/4620ecc1e71ebe37.jpg
c/9/0/c90002ddc1dff7b2.jpg
c/e/c/cec4d38f2521a370.jpg
7/5/d/75d1d858f67647d9.jpg
f/1/5/f1517a99e181b5f8.jpg
f/1/c/f1c76e289f8348ac.jpg
8/8/9/8890e1cd27e3a491.jpg
3/e/8/3e831483735c4029.jpg
e/b/b/ebbda837155a2df5.jpg
5/0/c/50c9a795a2c8c00d.jpg
0/9/b/09beca3c114ade40.jpg
1/1/2/112b5885c7fe3fd2.jpg
8/0/5/805da0f7ccd63a7d.jpg
a/8/8/a8888cbac46d7667.jpg
e/7/0/e704f4c8c08b3d91.jpg
0/3/2/03267d576dfb5191.jpg
0/4/5/045b856a87139391.jpg
c/c/4/cc40ed9fbbc4f158.jpg
f/d/7/fd78284da8903a52.jpg
3/5/3/3534f722ce5e0879.jpg
b/5/c/b5cd90f720cda66a.jpg
7/2/f/72f4e7b88d8e0ffa.jpg
5/a/e/5aeb443992acce2f.jpg
8/6/5/86531b84d12a869e.jpg
3/e/5/3e55587a87b310a7.jpg
8/8/e/88e5b22953c93a1e.jpg
1/3/4/134c6c4e5b2d6782.jpg
8/9/6/89614314af4be7fe.jpg
5/6/7/567f421114f7edbc.jpg
6/7/1/671101ba74f5dc01.jpg
2/c/a/2ca01390463a2723.jpg
2/7/e/27e90dc21fef6a89.jpg
e/5/a/e5a21d52790f90fa.jpg
3/6/e/36eea8057df26bd8.jpg
2/5/0/250ef46a35a39827.jpg
8/f/2/8f29e09887c428b3.jpg
3/8/9/389882eed4c67a25.jpg
a/7/7/a77224ef2d8177a0.jpg
d/7/3/d73db81067983319.jpg
2/8/9/289840e5cf5c08c5.jpg
4/7/b/47bafcd861121977.jpg
e/f/4/ef4568ba1031e604.jpg
6/8/3/683a623cdcfa003a.jpg
4/1/2/41239bade2b7c4c5.jpg
2/9/6/29656d185dfe9ce5.jpg
6/8/0/68077e42215daaa3.jpg
1/a/e/1aeb1b296762365d.jpg
6/b/9/6b9727445437f91f.jpg
0/2/e/02ec4e94b0f6cdd4.jpg
a/d/a/ada7921a80dc6212.jpg
2/1/a/21adad454e72eb0f.jpg
e/b/e/ebeace5cd9d2b3ba.jpg
5/b/6/5b60bfa57727964a.jpg
8/d/e/8de3a799db132296.jpg
7/a/5/7a59db43bbbdbdee.jpg
2/0/e/20ee3d8b21b008fc.jpg
d/a/1/da1bf32dbbd46fb9.jpg
7/1/5/7154d9460a9b8bd0.jpg
b/c/c/bcc838f75f994258.jpg
9/3/9/939b276500aed772.jpg
f/d/7/fd7cc51caad3db27.jpg
4/b/0/4b0cc118440219db.jpg
4/4/a/44a2563cf5d71671.jpg
d/c/3/dc3ab422a4c91580.jpg
2/5/d/25db822233796d6b.jpg
0/c/6/0c6ee44fdc63b328.jpg
7/1/b/71bc21b1269aaa3d.jpg
e/3/d/e3df0f323b5c8ed3.jpg
6/8/a/68a3a3b0ffe2a826.jpg
8/9/8/8983679d3d286028.jpg
4/0/2/4027ffaea6dbe1b2.jpg
b/1/f/b1fe2bad28e01bff.jpg
c/b/5/cb5ae24a33c0c18e.jpg
4/0/3/4031a064d0a6c2e5.jpg
6/a/6/6a6f43eb73c13959.jpg
1/9/a/19af4b82a5569aa6.jpg
a/c/d/acd4a0228800162e.jpg
3/6/2/362fb4cdc853c292.jpg
3/d/3/3d38e2113f1586ca.jpg
7/8/f/78f75d38fac410fa.jpg
a/5/2/a52da7744c327275.jpg
e/d/4/ed4a175c3ea03199.jpg
a/c/8/ac82119a578e33be.jpg
9/7/6/9767d03047301ae9.jpg
d/d/d/ddd3511e8946f088.jpg
2/4/b/24b80e6511d37d80.jpg
1/6/3/1636eb6ea583ddad.jpg
f/9/4/f94ed687762476df.jpg
9/8/2/982f988c59efa4b2.jpg
7/f/2/7f2494f97e213e76.jpg
f/6/0/f6083c794d438f08.jpg
d/e/9/de966f5aee133f60.jpg
2/d/e/2de56c290e59b91d.jpg
c/0/4/c04bfc9ef703ce31.jpg
d/c/5/dc5d648c2c301ada.jpg
c/f/7/cf77315edbbaed8b.jpg
f/9/8/f988e982ff29eb64.jpg
c/4/9/c49cd6a967a9efc8.jpg
a/c/2/ac2e060d753773cf.jpg
2/8/a/28ac29b5a1a12559.jpg
7/f/1/7f1566677530d1b8.jpg
3/9/5/3952210737e309a1.jpg
0/2/1/0213788e301d7e7f.jpg
f/7/5/f7528a2271ef3521.jpg
d/1/7/d178547d28e12c18.jpg
7/4/6/746473f25823c115.jpg
1/2/4/124054ed08aab0f2.jpg
9/c/f/9cf259dc60cfde2e.jpg
7/4/a/74a11c4802204049.jpg
6/3/0/6308377cd6a74fd2.jpg
a/0/8/a08d8503e86e92e6.jpg
3/5/c/35cbc0827d5614ff.jpg
3/b/b/3bb6ad3505479da2.jpg
c/d/3/cd3b195a406aa64f.jpg
8/d/d/8dd1bde9749a7f3e.jpg
8/8/8/888e050337d6ef35.jpg
f/d/2/fd27a6155ccde9ff.jpg
7/3/c/73ca0c16b99c5593.jpg
f/2/f/f2f47c59dd3abf45.jpg
2/9/a/29a0e8201da00f4f.jpg
0/9/9/0990e35746efff7c.jpg
a/9/7/a9778b1ee2100de1.jpg
2/e/9/2e9499c99f6329d9.jpg
5/7/a/57a4f7a7e0d7c2f7.jpg
0/7/9/07907dd2f214968a.jpg
9/b/f/9bf622972c428781.jpg
2/d/8/2d85bcd75c1a2221.jpg
e/2/4/e24a3e12469b3a80.jpg
6/a/9/6a905b920b79dbaa.jpg
2/9/1/2919cff4ad3ef0e1.jpg
6/3/5/6354c2f4f6cde625.jpg
c/d/5/cd5bbe540fb3fa59.jpg
2/4/2/2421769550e6cd37.jpg
b/9/b/b9b9166fa4c157b7.jpg
5/2/8/528a20e259edc591.jpg
0/4/5/045d996023ded17d.jpg
3/c/0/3c0e40527acce28a.jpg
e/7/d/e7d13c96eb99727c.jpg
6/9/1/691819da656af41a.jpg
3/1/e/31ee110d0db26746.jpg
3/6/d/36d457d1b724190f.jpg
f/b/6/fb6541a9443bbed4.jpg
3/2/0/320ac408e3dc6085.jpg
3/7/7/377b26ca66300b68.jpg
2/6/7/267aeff11f24272b.jpg
b/2/6/b262a51ffcd73196.jpg
e/e/7/ee7d5d812f37b1df.jpg
8/7/6/876971b0476177cf.jpg
9/e/8/9e8d4f64286318b9.jpg
7/1/2/7125a8b30e8d6a29.jpg
f/d/1/fd1cf610e81db8a7.jpg
4/8/3/483486ae74f9e6d5.jpg
3/e/9/3e9ad3ff6ad673a1.jpg
d/8/8/d88c77b21fa3e60e.jpg
d/8/b/d8bbacd03be0af6c.jpg
5/0/a/50ae3bd90d493ae1.jpg
8/0/d/80d0ed6cb594be00.jpg
4/1/3/413c7a5769d59fa4.jpg
d/5/3/d53f7ad87fbc1925.jpg
2/3/1/2316ba9da54dcdd0.jpg
8/6/8/86832c2488013e72.jpg
4/8/3/483c73062e1a8846.jpg
b/7/2/b72c8153d9b4303e.jpg
9/2/1/921b9d620927d721.jpg
5/3/d/53d7dc720393d846.jpg
8/1/0/8101e2bbcad34b93.jpg
6/e/d/6ed61f1842125a80.jpg
4/5/e/45e7601b6b226848.jpg
c/a/b/cabc6cc58250ac97.jpg
b/9/5/b95f5ee3059e472c.jpg
2/b/f/2bf622e6c8dffcd0.jpg
2/6/6/2669865e31c2ef83.jpg
7/e/b/7eba91d2a61c0bd1.jpg
4/4/a/44aacd664daa1e7e.jpg
e/a/3/ea324c124eead63a.jpg
3/7/f/37f296eb3928cae1.jpg
2/8/b/28b6def66790e9db.jpg
7/e/0/7e00b4880a2b33e0.jpg
e/b/3/eb3a27176dbb0579.jpg
0/b/a/0ba019c0dbb8c316.jpg
a/8/4/a84542ffc9b3994e.jpg
9/7/0/970bec74554d1af8.jpg
1/c/3/1c3ed082c036a0d6.jpg
4/7/e/47e413f1cba3f2c9.jpg
4/0/6/40617f1e6bc37650.jpg
8/2/4/8249d27c7dabc1e8.jpg
8/9/b/89b718d6330d6f34.jpg
c/0/9/c095cb8064773b69.jpg
d/9/2/d929c70717758aa5.jpg
1/2/a/12ad16232b46cf3f.jpg
3/1/2/312b2b63f804ed7c.jpg
1/4/e/14ea07ffa87cd62d.jpg
2/0/9/209f3f979654b70e.jpg
0/d/9/0d98ac81ce5d9989.jpg
0/8/5/085aec0bcd7289c5.jpg
3/7/2/372ce2edc94da54a.jpg
2/8/6/2869f18726c7c07b.jpg
c/b/c/cbcdd27b6738a7a4.jpg
8/5/e/85e0fdb475237f9c.jpg
a/7/d/a7d14aaf13c097a5.jpg
9/3/a/93aa12a7b242f9fa.jpg
5/4/3/543a082e28c909e0.jpg
2/b/8/2b8be49cf1301b32.jpg
c/3/9/c3936304d8f0a913.jpg
7/1/5/71598584b9dbfa75.jpg
6/6/7/667e966db7fe6ed8.jpg
1/3/4/134dbaadd283c392.jpg
e/9/a/e9a505e77bc00b01.jpg
3/6/4/36400cb3bc29966d.jpg
9/d/f/9df27f9012719f86.jpg
f/0/7/f07ef96aaa38e55b.jpg
4/2/3/423ffab20848c9ae.jpg
f/8/3/f83b237d970e34f1.jpg
d/3/9/d3993fc4e43bc6ca.jpg
a/5/1/a51215e6de5b7cac.jpg
5/e/2/5e20f3111dd53772.jpg
8/a/7/8a7790626e0b5f0f.jpg
7/a/f/7affbed2203fba7a.jpg
0/b/0/0b0f00b273876789.jpg
1/f/4/1f45080c77455fd1.jpg
8/5/8/8584684aeb97cb9c.jpg
9/d/7/9d79503559cec6d3.jpg
c/4/d/c4dafe63515a7b70.jpg
1/5/e/15e68885efdb9d35.jpg
2/e/d/2ed5a273271b7189.jpg
c/e/0/ce0b7c2878e9deaa.jpg
a/9/4/a94140e7bcc96054.jpg
d/2/8/d288c8383c426bc0.jpg
4/f/f/4ffe9762544d37d3.jpg
0/d/0/0d03b3c4893c8aab.jpg
3/6/1/361e06051aaf9bcd.jpg
e/3/7/e3722187dfd12c56.jpg
0/3/d/03de79c08016c515.jpg
6/f/3/6f33ded95cbc272b.jpg
4/9/5/4955c9d6009297c4.jpg
a/c/e/aceec71379bfc41a.jpg
a/b/6/ab62bd06e79abc52.jpg
f/2/2/f22a37c72eb0eb50.jpg
6/9/7/697d59d597b3e8a0.jpg
9/e/c/9ec1c7628676ff67.jpg
2/2/a/22a1dd23b92199e8.jpg
e/4/1/e41987ac07d5c4ba.jpg
1/f/a/1fac63b270029014.jpg
5/7/b/57bdfc25386d653a.jpg
6/7/e/67eb33303a3c5bb3.jpg
6/2/0/6208f2eca08f4841.jpg
8/c/0/8c025cdea12c4366.jpg
9/f/3/9f39bb61b4c039ea.jpg
2/8/a/28a93ea40339443e.jpg
7/4/e/74ebe526b7608b82.jpg
a/c/c/accccd791b4f3e00.jpg
e/4/c/e4cae9a797d6fac3.jpg
9/a/a/9aa0920708c97b95.jpg
7/8/b/78bf422d596fe61a.jpg
3/1/9/319dbf05242c67a1.jpg
7/1/c/71c08d873938b503.jpg
d/c/4/dc4267e8efd119a3.jpg
a/5/5/a55d1fedf3938f59.jpg
1/9/6/196d56d82b94a872.jpg
0/2/1/021ea5c1b134bdcf.jpg
d/0/0/d00ff5928c182895.jpg
5/b/3/5b33050a7139c814.jpg
6/c/4/6c40cb9c4cca77ed.jpg
4/9/0/4908a6f57e9c22a4.jpg
5/c/8/5c89bca024c3538b.jpg
c/4/c/c4cd5d03e84de2fb.jpg
d/1/9/d198ff10ff6e2685.jpg
c/8/8/c88b01f5acb63dd2.jpg
3/b/9/3b9cc4c759fc47f8.jpg
9/7/d/97d568828e608468.jpg
7/2/4/72429c623f9e76fd.jpg
2/7/7/277a2302fea3aaad.jpg
1/8/a/18a0cdcf17efcd68.jpg
9/d/1/9d195c8eb07015f4.jpg
0/c/b/0cb98dd5f1573857.jpg
6/8/1/681116ca39d1cc43.jpg
e/6/7/e6744b57b4fabb51.jpg
8/b/0/8b063981ee8a3c13.jpg
6/a/6/6a65b101ec650d0f.jpg
7/7/8/7787c5cbe1e11084.jpg
f/e/5/fe5fa9ec249cf76d.jpg
1/5/0/15063713c0bb06b3.jpg
9/0/f/90fcea676e3f1f22.jpg
6/3/9/639931b2eedb1369.jpg
9/a/1/9a1672313e08a1d4.jpg
f/5/b/f5b5bf3d630c0131.jpg
d/d/7/dd74e90036397074.jpg
c/3/9/c392e6506baeefab.jpg
b/6/1/b61338e3dba6019e.jpg
8/5/3/853c9be88480ee1d.jpg
1/c/9/1c92044f8a586337.jpg
4/8/2/482546a1785961f6.jpg
6/2/c/62c9628845516869.jpg
1/b/d/1bdeb835828c7dff.jpg
3/c/d/3cddbb50deb3be92.jpg
5/e/8/5e81354c7e612181.jpg
2/5/5/2555d0970082334a.jpg
a/a/c/aacd77fc15cdbbdc.jpg
9/f/2/9f28ffa19ce6e488.jpg
f/c/0/fc0ccd2546b9acb4.jpg
5/b/a/5ba11447f438a4c8.jpg
c/d/9/cd96caffc182609b.jpg
3/f/3/3f3636dead14c013.jpg
2/f/6/2f6f7501fa024ea3.jpg
8/f/9/8f99a4a3a4eb1828.jpg
9/3/a/93aab9e7c193a6de.jpg
9/9/b/99bd8b13598e6797.jpg
2/9/d/29d95809a3e7bdba.jpg
5/8/6/58609f290d9a9c81.jpg
5/b/f/5bff10e13de6ed36.jpg
2/4/b/24be818075e19dbf.jpg
2/1/e/21ea033726484d52.jpg
2/d/8/2d88ce393d47e0ab.jpg
6/7/e/67ea604d94092bb2.jpg
6/0/0/6006e7d0bcd48d13.jpg
2/9/a/29a8bd6cb07939aa.jpg
a/1/e/a1e1ce9d97f8c375.jpg
f/c/b/fcb676b5b3b59cab.jpg
c/5/8/c58559a48b34e6ce.jpg
7/f/5/7f5547ab60469596.jpg
3/b/a/3bafe3799df3fd6e.jpg
9/5/b/95bb396b47d730b5.jpg
d/8/2/d82907f6dc300bc9.jpg
9/8/4/984c651fddd90b5a.jpg
5/1/5/51587731cb42af64.jpg
e/1/6/e161e7c45bb90051.jpg
c/5/9/c595b76ee4da3fb3.jpg
8/3/3/833ee488f05c5df7.jpg
8/a/5/8a5509a697c301e3.jpg
4/8/4/484b3501c3dd48a1.jpg
5/1/1/511784e4f95d1262.jpg
3/a/4/3a495dcc66f56ae8.jpg
d/a/3/da3a1fe36e39dbd8.jpg
6/a/b/6ab5c0850529f914.jpg
5/a/9/5a974e238317acf1.jpg
8/f/5/8f574b68bf84006d.jpg
b/7/f/b7f72e6fb5c6ebcf.jpg
8/0/f/80f0e8be69da65cb.jpg
a/b/7/ab71f54147bd4732.jpg
0/a/0/0a01f941265b6d72.jpg
a/4/1/a417074a630cd477.jpg
9/5/e/95e9ead1ce6a6656.jpg
d/c/9/dc93689b2d92e883.jpg
e/0/f/e0fd9fae8141fd94.jpg
a/1/1/a1157652706df970.jpg
1/5/c/15c3342662cf7c95.jpg
8/0/0/800f2ab0cf607733.jpg
4/f/7/4f70c0084d204e79.jpg
4/3/d/43d66e29a95acafc.jpg
d/0/b/d0b6231eda365969.jpg
b/9/5/b95ca329bec2d1a0.jpg
5/e/2/5e258b697eb13e1e.jpg
e/a/c/eac70954049769f6.jpg
4/5/c/45cb0aa200cdb65d.jpg
1/a/7/1a775199fa8321e5.jpg
3/8/0/380bec42f5c937ba.jpg
f/e/2/fe24ad5a8409e4cc.jpg
f/3/1/f314011aaf0e0f20.jpg
8/5/5/855a4b7746cff44d.jpg
1/a/c/1ac2bf1ff027f845.jpg
f/1/a/f1abf6aecc3290ba.jpg
6/8/1/681ab628af990bfa.jpg
9/3/d/93d668d3dcbcb69c.jpg
a/3/b/a3b97254fe594847.jpg
4/4/6/44650607f9bde268.jpg
e/a/2/ea278e19b072a297.jpg
c/7/4/c7466e30a09b643e.jpg
b/1/5/b1549efe288fdb1c.jpg
3/5/4/354068c8a16b2ddc.jpg
2/7/3/2730ed5149a14b99.jpg
8/e/6/8e6048c4f3c3e9e7.jpg
2/5/0/25076616c8333e08.jpg
7/d/e/7de50ae3a5438c20.jpg
0/7/c/07c1e9361d470a80.jpg
f/f/8/ff86d1094f085b90.jpg
f/e/5/fe5cd1b03958c5c5.jpg
9/8/e/98e632202425201a.jpg
d/c/c/dccee7c2c130de2a.jpg
b/4/d/b4da19b587c4a093.jpg
f/6/6/f667d88ceb08dc11.jpg
e/a/5/ea557be1f1ab69e0.jpg
3/6/7/367cbec94dff0bf6.jpg
6/2/0/6208be92e30058c4.jpg
f/3/4/f348556d41ffb318.jpg
c/5/6/c5617778e9de4707.jpg
a/d/2/ad2986dd49e42d60.jpg
c/f/6/cf6bbc3d5c4eefcc.jpg
1/2/1/121943270c75a1cb.jpg
7/0/7/707b7cbac28043a0.jpg
c/4/e/c4e32dd221ecfe48.jpg
a/6/8/a689b15ba71ceeda.jpg
0/3/f/03f71374f9ead0be.jpg
f/c/c/fccfa53cea3e2270.jpg
a/6/4/a64c75bb18014717.jpg
a/a/f/aaf04d4ccf864b95.jpg
4/7/5/4755bb5404c572bf.jpg
f/9/1/f91eb3d04b85b675.jpg
3/8/0/3805b5fe121d3892.jpg
1/9/e/19e69d68b3111ad7.jpg
b/2/9/b297de99ffc98b48.jpg
a/2/4/a248ba81b719a32a.jpg
3/7/9/3794db561959129d.jpg
8/c/b/8cb0706009d2fcc3.jpg
6/f/8/6f8b1f98572edf70.jpg
5/3/f/53fc58a5b45cb98d.jpg
f/c/b/fcbe00d9d0799d08.jpg
1/f/6/1f61d68117727742.jpg
5/0/1/501ad69e9432aac3.jpg
7/9/6/796491ab256557b3.jpg
e/8/d/e8dc4fd26e48a78c.jpg
1/8/f/18fdcf6809f4af20.jpg
0/c/4/0c4895aa3870a35f.jpg
9/2/1/92110757adb4dce0.jpg
0/7/3/073adae42243e11d.jpg
9/e/0/9e0d6e7ab0665491.jpg
1/d/c/1dcf7656c759d054.jpg
7/9/4/79459730b27d4c65.jpg
7/b/3/7b3841064b9d198b.jpg
a/0/c/a0cbcee62343d04b.jpg
b/8/2/b82b8fc002be7c50.jpg
b/f/d/bfd5710a954983b0.jpg
5/d/4/5d4a9e92e17d3f85.jpg
7/1/7/7176aa857e927bbf.jpg
4/a/8/4a88145a4adca9fd.jpg
0/1/4/014e0b0b08932578.jpg
6/7/f/67f442f27de17542.jpg
e/2/5/e251da45782f476c.jpg
3/2/f/32fc9d8109e3f967.jpg
9/5/b/95b9d3e5ad1c630f.jpg
2/2/8/22888655ca2f78b5.jpg
4/1/7/417a05caacc00eab.jpg
f/e/2/fe2070ee846ad0e5.jpg
0/1/f/01fb7762aa8595f5.jpg
2/2/d/22d0dbbc5da5c515.jpg
5/2/d/52db031ce440276c.jpg
4/7/7/477e95d97f2eaaea.jpg
b/f/c/bfcf48cbb743d5d0.jpg
a/e/7/ae7037db62a0136a.jpg
d/c/f/dcf450d7f266a959.jpg
f/7/9/f79f4a9fbb560549.jpg
2/5/6/256a964381b48d5c.jpg
7/e/8/7e81699bc6805736.jpg
2/2/7/227e775511f7be8b.jpg
1/c/9/1c9e5db6e377b3ad.jpg
4/3/8/4382644da84a3ec9.jpg
d/6/2/d6269f2a74f99371.jpg
b/0/3/b03176b5f253655d.jpg
b/1/b/b1b4acb4e161f26b.jpg
2/9/0/2903662702033361.jpg
1/1/4/114f3791aae8d0d6.jpg
b/4/c/b4c51b5d18ca5420.jpg
f/3/c/f3ced971c291d0a1.jpg
6/c/5/6c565047e18de848.jpg
b/b/6/bb6c2de931e3065e.jpg
3/b/c/3bc7e8ab0315da39.jpg
0/8/6/0868fbff93249e8c.jpg
4/5/7/457763df6f4d407a.jpg
0/e/b/0eb3def1de6a2409.jpg
7/6/f/76f9586b03933a58.jpg
5/e/6/5e61b273c70c7ff0.jpg
e/5/d/e5d62b374b23dac7.jpg
1/9/3/1933a0eb475710fc.jpg
5/a/4/5a49d41ef3b4652f.jpg
e/f/0/ef000427b46a8920.jpg
7/0/e/70e65c2093ac4542.jpg
3/d/c/3dcc71ce3c00a85e.jpg
1/b/f/1bf2f03d0a3be967.jpg
f/6/8/f6860f0afda5bfdf.jpg
c/9/d/c9d18f89c14584e2.jpg
9/f/1/9f10c359e464f3ad.jpg
d/c/8/dc8e61752cc2a23e.jpg
5/6/a/56af2f4e449a7586.jpg
6/d/2/6d25d721b134a101.jpg
d/5/3/d5352e2982dc97f8.jpg
8/0/c/80c09e233b6a076f.jpg
f/9/1/f91923d6191034ae.jpg
2/a/2/2a285192ace69c0a.jpg
f/d/1/fd17bb32ad16c027.jpg
2/d/b/2db03ab400a14485.jpg
f/2/2/f2260e625c3b73b0.jpg
e/f/9/ef966ca292db6817.jpg
2/5/0/2501837a6c90e5f4.jpg
2/6/e/26e35dcecdc8bf17.jpg
c/a/f/caf3785b116624a7.jpg
4/8/e/48ed933f4b2d6ad6.jpg
a/d/8/ad8470b771e35ef8.jpg
7/8/f/78f8d096e48adede.jpg
9/3/b/93b466ece454d82e.jpg
e/4/9/e492d676a517b362.jpg
7/b/9/7b9a259f90c68522.jpg
3/0/4/304a27175fc743c3.jpg
4/3/5/435daa7d147887b3.jpg
c/8/6/c866ff217359abe6.jpg
1/b/d/1bde43361db3d58a.jpg
1/6/b/16bfbb25505f0554.jpg
e/3/9/e39886acf40b6033.jpg
8/4/e/84e61c6007010921.jpg
5/f/3/5f3178cbceab2794.jpg
5/5/6/556b18c3e4a86254.jpg
f/2/6/f2636265404c760a.jpg
a/0/8/a081162036ea088f.jpg
d/8/9/d89a62eadfd201b2.jpg
a/2/a/a2a73d7f03fff9b9.jpg
3/e/3/3e38833d75d1af17.jpg
d/9/8/d9802038c2e78ac8.jpg
8/3/9/8397c399c5d0c2f0.jpg
e/7/d/e7d645f527768aee.jpg
4/8/d/48d6b1be6dbe769c.jpg
c/9/3/c9358588f6bedc43.jpg
d/f/d/dfd278daff254ce6.jpg
9/d/6/9d6f9f3c9f137f2b.jpg
9/d/3/9d3d3600a50034ad.jpg
a/9/1/a91f169abc6f214c.jpg
c/3/0/c308664fd2b182c0.jpg
3/f/7/3f7542892d357f2a.jpg
3/c/3/3c3ebae725e51e88.jpg
5/c/7/5c724594d99d2fe1.jpg
3/f/0/3f02dceb30dd61bd.jpg
6/7/6/676a9507af0bb5c6.jpg
a/4/c/a4ced77e6142402b.jpg
9/e/3/9e3a1ba32c698708.jpg
7/8/0/78081ba0e94c7ebd.jpg
c/1/1/c11fae89eccfe612.jpg
f/9/c/f9cc07445f62877b.jpg
6/b/b/6bb62ca0db972b0b.jpg
c/9/2/c920f18d9753e024.jpg
3/b/3/3b3bb55445c38b20.jpg
1/e/c/1ec827fd0e7f555c.jpg
8/2/0/820f1fc0a40e39c4.jpg
b/5/c/b5ccc85f5d13843a.jpg
e/1/0/e1059ddc84bf7667.jpg
b/2/9/b299fb30ec6adec0.jpg
e/8/1/e81199ed0948c34a.jpg
f/f/d/ffd048e8c98bd6c1.jpg
a/4/f/a4f44842d4bb2c50.jpg
7/b/7/7b7c5b5e5270545f.jpg
f/5/6/f5683ed8c92425aa.jpg
8/5/5/8555d4edbf9a4532.jpg
5/c/3/5c304d8d9178ed37.jpg
6/c/e/6ce18420008e03b8.jpg
f/1/1/f116c4befb44da6d.jpg
7/9/2/792f3fd7ce8248a9.jpg
3/2/1/32177037c947f0bc.jpg
f/d/3/fd3e8bb9dfedc717.jpg
b/f/3/bf3307a74994e230.jpg
9/2/7/927baa303f5c2820.jpg
c/2/4/c247c888079875c6.jpg
c/b/2/cb22971f9614b5a0.jpg
2/8/7/2879df13c03203b8.jpg
a/0/f/a0f90ea146e937ed.jpg
6/5/e/65e7f2f56a11b8a5.jpg
4/b/b/4bbcb1f965bb11cc.jpg
3/4/3/3434dd4aba0bd307.jpg
9/5/f/95f1121225fa73fd.jpg
e/6/7/e6749e2432ba134b.jpg
0/1/2/012cc68acf18f14d.jpg
7/e/2/7e252f766eba5e26.jpg
4/c/1/4c1ef75bcec7d00a.jpg
9/1/2/912dbe12f5252f28.jpg
d/4/1/d413d968a06c6b80.jpg
9/1/5/915224259ea93ef8.jpg
3/9/0/390f1014c9f840ed.jpg
9/b/0/9b0f5193a556845b.jpg
0/9/6/0968c7abb57450ba.jpg
1/e/9/1e9161362c8a6c13.jpg
2/f/c/2fc7d4c554deda71.jpg
0/f/d/0fd6ff5f20d9dbb8.jpg
5/d/e/5dead1e55b49c3dc.jpg
c/6/e/c6ec39e7a818b26d.jpg
0/3/8/038c584d73eca4da.jpg
5/e/c/5ece262392d6bae8.jpg
0/6/f/06ff2134bcd32691.jpg
9/1/1/911dd3261e6cb979.jpg
2/c/5/2c581c799511c666.jpg
a/6/c/a6c21529399e7874.jpg
6/e/c/6ec9fa08a36e0208.jpg
3/b/3/3b3a62fa0ec8ea97.jpg
d/b/0/db07cf9681183306.jpg
4/7/c/47caac277bdc551c.jpg
b/3/5/b351b9137311f8c0.jpg
1/d/7/1d75a996055060d6.jpg
4/9/b/49bc2cbfb386b3c6.jpg
3/7/6/3760c2aa0091487d.jpg
9/f/3/9f358ec1d1fdef6c.jpg
6/7/1/67137eead1c69224.jpg
d/6/1/d61c2b0d02f4237b.jpg
6/e/f/6ef924b56bbc11ee.jpg
c/8/b/c8b709fc73440a3d.jpg
9/2/7/927f960d1f9b6dfa.jpg
c/4/6/c46c0dbaec6e41f5.jpg
f/7/c/f7c529e2c00af462.jpg
d/c/c/dcc33e91bd3e6439.jpg
2/6/4/26473ca0aac56f3e.jpg
6/a/9/6a91d3495ace7566.jpg
2/d/5/2d5f4c2a32924d9d.jpg
9/7/b/97bf06ca9d850105.jpg
1/d/b/1dbdd858bcb6a188.jpg
a/0/f/a0f515a1a463e202.jpg
6/8/e/68e329cc8af58088.jpg
7/9/1/7918023048f722ac.jpg
9/d/8/9d8139d4ad35869f.jpg
f/4/9/f491496389d80878.jpg
9/9/3/9937a27b380be4f5.jpg
2/f/a/2fadf3f89e7e3fc1.jpg
4/2/3/42353e1fdfdb825f.jpg
f/2/e/f2ee9da90cceb77f.jpg
0/a/b/0ab90d12e61b42c7.jpg
5/a/1/5a15dff508b9aca6.jpg
8/d/5/8d5a7ac879ad69a2.jpg
f/e/c/fec5e4348267c198.jpg
3/5/3/3539ef1d3c8cf60f.jpg
1/e/e/1eee7bee1d73684c.jpg
e/8/c/e8cfce047b1d8d12.jpg
6/1/5/615f84048f24a6d0.jpg
0/4/7/0479919340cb5712.jpg
d/1/d/d1d51390a16c7830.jpg
e/5/f/e5fc394336a7923b.jpg
b/1/c/b1cfa230cbfb047c.jpg
7/2/8/728d18dd8119ed0c.jpg
f/9/9/f99fa6e83c5e8c6e.jpg
e/3/5/e35c3dba3b6cf070.jpg
d/3/b/d3b8d2ad476e0ca7.jpg
4/b/e/4be0f76934d5d5f9.jpg
2/2/2/222a91324a639608.jpg
d/0/b/d0b55d5b8386758a.jpg
4/3/2/432213cb43aae471.jpg
5/7/4/5749ccd195ea77ee.jpg
7/2/9/729f5b9bc4f10f08.jpg
9/6/b/96b9eca3c7a6b5b7.jpg
c/d/3/cd33b7890862a456.jpg
8/3/2/832ae7d390ecee62.jpg
f/5/e/f5e4173a223596ee.jpg
2/9/7/2976f6a58b2d0ec0.jpg
d/5/e/d5e9c0bc09ddafbf.jpg
6/2/0/6201cc58a37d91cc.jpg
3/4/5/345347f13fc3944c.jpg
8/a/1/8a1a9aeb81419f73.jpg
a/7/8/a78bf561bd50a74e.jpg
f/7/c/f7cb419f32cb7b85.jpg
d/5/4/d54eb98a071ce578.jpg
7/2/0/720f105332ee3d95.jpg
9/c/0/9c0b0b28c1a42c91.jpg
9/d/4/9d44672674369f6c.jpg
e/f/5/ef59238679ff18b9.jpg
1/d/a/1da3d66f10dae109.jpg
1/1/e/11e880e33b2597d9.jpg
a/f/5/af53c3802875a3e7.jpg
c/e/d/ced87789e136eabc.jpg
e/8/d/e8db370f1ac0c601.jpg
7/1/8/718a6942d375373a.jpg
b/a/0/ba0c16bce4214795.jpg
3/b/0/3b0eecc0e1aacb09.jpg
4/3/7/43766aaa453b0495.jpg
f/2/b/f2b47b82fd74c2f1.jpg
3/0/0/300448a2cf1305c9.jpg
5/3/1/531ffbf5bf1a6d40.jpg
b/9/c/b9cbae0ff2b3ba69.jpg
0/3/a/03acdfdab54d331c.jpg
b/9/0/b908a297c3b8b37d.jpg
2/6/3/2634b8886b5a4921.jpg
4/4/b/44bd4f08593212ac.jpg
9/c/b/9cb62f5d6ef920f9.jpg
5/6/f/56fca43787eda1e5.jpg
e/9/0/e904ad25a6a9a92b.jpg
7/2/6/7269d330d26db074.jpg
f/3/2/f32368af95a1b228.jpg
8/5/e/85ed93f7e6c74af7.jpg
d/5/2/d52486280482488c.jpg
1/6/5/165d594c20b6979c.jpg
2/1/d/21d9862d5c4ef618.jpg
9/f/5/9f5f5f7b828d69e0.jpg
9/4/d/94d398a13151b8d4.jpg
2/2/6/2261c686d045b4da.jpg
e/3/2/e328244a7732c7fa.jpg
b/d/2/bd243ec40fa28466.jpg
a/b/b/abba032a270052c2.jpg
8/3/f/83f3531bfa797e70.jpg
4/f/2/4f229b11d1cdc2a7.jpg
3/1/a/31ae4b940eac6b21.jpg
d/0/7/d07e8c41328df734.jpg
8/f/1/8f19fab41270da4e.jpg
d/3/c/d3c7a12c7b9c8cf2.jpg
4/5/2/45272878c355b348.jpg
7/f/3/7f398addda8d77c9.jpg
0/c/7/0c7084a92d1c200f.jpg
9/f/c/9fc13af0fc1c8796.jpg
e/9/b/e9bb63b197aa1867.jpg
9/c/a/9caaca11b45e2814.jpg
b/4/9/b49870c579ee3ce1.jpg
9/6/6/96682d0b256c9e45.jpg
f/1/1/f11e4cabf85267b4.jpg
a/2/0/a20c2262622518d2.jpg
0/a/3/0a3201e358fc3d48.jpg
2/6/8/26851e99ebd4a9b3.jpg
d/f/4/df40fad1e8f2be4a.jpg
9/d/4/9d4d8221f756a881.jpg
f/2/9/f294ddbd6e9250d0.jpg
2/e/e/2ee023e217a08bb0.jpg
6/c/5/6c55a22f7386abf4.jpg
2/0/d/20df2913c57b588e.jpg
0/1/8/01801abfa4c2fa35.jpg
2/8/2/2827691dfb0d0bc3.jpg
f/a/b/fabe86e7fbae3036.jpg
8/a/e/8aec1a31ab716a3d.jpg
2/7/a/27a66cb6c5835ec0.jpg
e/8/1/e81c6128aab6beb5.jpg
3/e/8/3e8be189547a642a.jpg
8/4/6/846de41156503b49.jpg
c/c/8/cc8d5b4b91c11b95.jpg
8/f/0/8f03b49fd6f3faec.jpg
d/1/4/d1411e8e4b5edc93.jpg
e/5/8/e586d1150d73d071.jpg
8/3/3/833af89065e4bdfb.jpg
2/7/a/27afca2999b22322.jpg
d/1/a/d1a47aef2fb1ff61.jpg
d/b/3/db30c47898b77fe1.jpg
5/8/e/58ee40dc9214ca85.jpg
6/b/c/6bcf622a82409117.jpg
a/1/6/a16c7649b4db5309.jpg
e/4/d/e4d063f33c3fdd26.jpg
e/c/a/eca88c6eb45ed7e3.jpg
0/7/a/07afdc66b0578847.jpg
5/0/1/501a50d8ece2b8dc.jpg
7/6/9/769669012d8fac44.jpg
d/0/0/d00f7b6d4306ebb6.jpg
0/7/d/07d8bfc15789091c.jpg
2/8/e/28e8af702fddcda9.jpg
c/7/1/c71be70365a43d6a.jpg
3/8/2/382245265ab5b499.jpg
0/2/1/021dc90bc1bf8879.jpg
b/5/f/b5fd499995f40d4b.jpg
0/6/5/0657c38ffed0d992.jpg
f/b/f/fbfe546e4e10bd61.jpg
b/3/9/b391454876f4c318.jpg
4/a/b/4ab3186768c88abc.jpg
5/8/6/5867382707328bef.jpg
0/2/d/02d33a00c1efd128.jpg
9/8/d/98d1867990cc55be.jpg
d/4/1/d414a44515d6c812.jpg
d/d/1/dd1d8fdc338dbcc0.jpg
9/5/7/9574ccb91f1adf25.jpg
e/b/1/eb17947d55acd1d0.jpg
8/7/b/87bb0a71889b5318.jpg
d/4/7/d4733dcc38bce5d4.jpg
8/d/5/8d5751bf6f248877.jpg
7/b/a/7ba94ff95515ffc0.jpg
b/3/0/b3084766d3f04dc8.jpg
c/4/c/c4c944953940f514.jpg
5/8/c/58cf73d304d8515d.jpg
1/8/5/18578c51254ebfe6.jpg
0/e/f/0ef5e2510c149dea.jpg
6/6/0/6600808d1ea841ff.jpg
b/7/9/b798b630ddf55471.jpg
8/2/3/8230efd1d05de910.jpg
1/7/4/174e065b81b13cdf.jpg
3/f/5/3f5bb4e9b7d24668.jpg
6/9/b/69b605d45a3b183d.jpg
4/d/3/4d3085628fcdd7af.jpg
b/3/9/b396ce6fba081e35.jpg
6/a/6/6a6c67c16baf232c.jpg
b/6/f/b6f1335d311d1eba.jpg
f/6/b/f6b7065f05ac9e0c.jpg
6/f/8/6f8240179b68e816.jpg
8/9/2/892dccddae205ae8.jpg
f/f/9/ff934e80102d0f82.jpg
e/b/1/eb1109dd7d0ae2ef.jpg
2/0/d/20daabae58f98a0d.jpg
3/c/a/3cabea5f90c6d456.jpg
b/6/7/b6792ea3caacfa1a.jpg
1/a/1/1a135db4b0fe7c0d.jpg
0/f/a/0fae7d23571139e9.jpg
3/1/1/311057d8818412ba.jpg
c/b/8/cb8dd9373c23d8b8.jpg
d/3/7/d37bd28de8188f49.jpg
2/a/9/2a962012934b37c4.jpg
8/f/a/8fac796913149769.jpg
8/0/1/801cdbe23469b840.jpg
0/f/9/0f9339a5176de081.jpg
b/a/9/ba952d920fef59d3.jpg
5/3/6/536d05b1fb1a8aca.jpg
b/7/b/b7b0c9658c6a830d.jpg
f/f/3/ff3f11384b08f75e.jpg
a/8/6/a8632a602476b970.jpg
6/7/7/67718554c4a71b1c.jpg
c/a/5/ca52e551ed4ff316.jpg
c/6/9/c692f7589fe0b749.jpg
1/f/1/1f1c7808485fcdda.jpg
3/2/0/32047bb4842164c0.jpg
0/5/f/05fcd38cbd274703.jpg
e/0/f/e0fbd0e4acb57dbb.jpg
0/1/c/01cf7e3cbb3c2a65.jpg
8/8/e/88e2c027dead1981.jpg
6/9/d/69d1391e24c33a0c.jpg
0/4/6/046097bbbe07f26d.jpg
c/5/0/c5037f9f20217f45.jpg
8/4/d/84d70d82b0a86d98.jpg
8/c/e/8ce41a6de91439da.jpg
5/d/5/5d50d255068b187b.jpg
a/a/a/aaa3384ce5a509cf.jpg
5/2/6/5263f316f5cd8ecd.jpg
b/b/3/bb3e39ea5ac4325e.jpg
5/2/5/525004c154af3d67.jpg
d/d/9/dd9b17721918c3b5.jpg
2/c/2/2c26de16c2f4b5d8.jpg
f/2/3/f230b29a5ba38f7f.jpg
1/3/d/13d14d1163318322.jpg
6/c/7/6c79c8d9d8d36400.jpg
f/7/f/f7f6620bb2f44de5.jpg
a/5/e/a5e54f6dc5f44d2e.jpg
2/9/0/2904987c5975f223.jpg
9/1/b/91b89d7592af5d98.jpg
8/6/7/8675cd46e8e875d9.jpg
3/9/9/399879c3b5b98e0c.jpg
b/2/9/b2990e6b80603c10.jpg
1/5/1/151230de7523a94b.jpg
2/7/e/27eeb4a7e8bdf518.jpg
b/9/6/b96f09b129b37cd5.jpg
1/1/8/118667756ce1e254.jpg
3/b/0/3b086d270c346465.jpg
5/c/9/5c933e9781f924d8.jpg
c/7/8/c78241ed1eee5a0c.jpg
f/e/f/fef9a73bf7e406b1.jpg
1/9/8/198dac0733bd44a9.jpg
0/b/e/0be4139366b8199e.jpg
1/e/5/1e5ccaacad22b5c1.jpg
7/2/6/7260a16f4a0a7265.jpg
b/4/e/b4e0c28d48d76c61.jpg
7/5/a/75ad8b730e028b9d.jpg
6/7/3/673fdc0c4f1672dc.jpg
0/1/c/01c9198a8bde3b29.jpg
7/9/c/79c14d9a9fd2b0ee.jpg
6/c/d/6cd0a282348a6024.jpg
6/9/3/693d12279787e6f2.jpg
7/d/1/7d1af5d13ce71725.jpg
d/1/3/d1352678f11da927.jpg
f/7/2/f724dcb505c81d5b.jpg
0/3/1/03190540dbe3d0ae.jpg
d/9/0/d90c17b74a8f6d0f.jpg
c/3/e/c3e9a3a7477788a1.jpg
4/3/0/43076ddac5a4a277.jpg
3/6/1/361acba6f7748678.jpg
b/8/b/b8b702a7765e40f1.jpg
b/7/4/b74a09c70f0e2f2c.jpg
9/3/d/93dbbfe7e3242de3.jpg
b/a/1/ba1fe0912b4fae74.jpg
b/9/a/b9ae011b6e5d17f5.jpg
b/6/d/b6d8eb9deede557b.jpg
f/9/2/f92a8db363cc7bd4.jpg
1/a/f/1af1ae473251f88b.jpg
6/4/6/646da89f3ea9f88c.jpg
7/d/6/7d6014613cfebd8e.jpg
6/6/6/666a770f99cedb0e.jpg
5/4/d/54d7ca172f3b38d1.jpg
f/b/1/fb1aa7f336717364.jpg
0/8/4/084e1ed55073d05a.jpg
4/7/1/471e3e5345c98eec.jpg
3/1/1/311249f0db2d34de.jpg
7/2/8/7283338327aa1b5a.jpg
e/b/4/eb48da1b1e44bde1.jpg
8/e/8/8e824df5a82fb966.jpg
1/b/1/1b181a1c2e1e00bf.jpg
f/9/f/f9ff05e5ff85115c.jpg
5/0/3/503615d0ae8456d1.jpg
d/3/3/d33d43ff0a0b2563.jpg
8/d/f/8df2fbe68bc8363a.jpg
e/4/4/e4463a5f39eb1463.jpg
c/0/d/c0dbc02c253a89e7.jpg
3/7/4/3742387630431dc2.jpg
0/c/0/0c055245e9687b23.jpg
2/f/6/2f6a90301bd1c46d.jpg
5/e/c/5ec3526d9e8c3029.jpg
9/5/3/9534f56f2b41c72a.jpg
c/2/5/c259554210190ff9.jpg
7/c/1/7c16e1bed745795a.jpg
d/9/2/d9213421b6013ea9.jpg
3/4/8/3487f24f3706fd2d.jpg
6/3/0/630aeb956c9900fb.jpg
f/e/3/fe3541ad551d51c7.jpg
1/e/6/1e60270f23237652.jpg
f/8/a/f8acf66f7d9c1fa1.jpg
e/1/e/e1ebe50d89d10a31.jpg
7/f/1/7f1a61c7e87ea93a.jpg
4/7/6/476d67f62b803b99.jpg
4/c/c/4ccc60f8171666a2.jpg
1/f/1/1f18df760337a297.jpg
5/7/9/5796d74ca1a8cecf.jpg
0/9/f/09fe2588f18f60d2.jpg
c/0/d/c0d41462984be770.jpg
3/a/d/3ada46133417983e.jpg
c/f/8/cf8b62ad253ee006.jpg
f/e/9/fe9dcc8a2b33eed7.jpg
8/4/2/84293b07d5fc387b.jpg
c/d/7/cd733a18e0313410.jpg
6/5/c/65cb9087c782c761.jpg
a/9/0/a900bf2cac00c3e0.jpg
6/9/6/6965ba4ac4ec9284.jpg
e/4/2/e4293e2f867fa9b8.jpg
6/5/6/6569f5f175f72f5c.jpg
0/f/0/0f08931f097c5cfe.jpg
f/4/3/f43aae5093568cb2.jpg
a/7/1/a71f1aafff4e5c99.jpg
9/d/0/9d0bc6c14d123731.jpg
2/2/3/223cf20fb63a94fa.jpg
7/e/5/7e5b3f726f79c56c.jpg
5/3/3/533583c92dbd27d9.jpg
c/d/3/cd33975a83ccb6d9.jpg
b/c/c/bcc959b6c71d06e9.jpg
8/1/8/818b3b2d78cccd1e.jpg
d/d/7/dd7c7eb8a8f99b21.jpg
5/4/a/54aa8a4af38160fc.jpg
b/0/3/b0386d736ff19118.jpg
9/a/8/9a848351f1c9200b.jpg
e/a/4/ea4d3a198469d798.jpg
3/a/0/3a05c8c16e1f47d2.jpg
4/d/4/4d4758d96cbe6555.jpg
9/a/7/9a7b5174ba786830.jpg
e/9/9/e99586146db3a818.jpg
e/e/8/ee8324eafdbd5075.jpg
2/c/0/2c0b65625c8d3ad3.jpg
4/1/4/4149ffb309f9808a.jpg
2/d/8/2d88da1877589edd.jpg
3/9/3/3936851ac4841420.jpg
7/9/9/799032479560eae0.jpg
e/b/2/eb2378b2498930aa.jpg
2/9/e/29ebaec8ae776fbf.jpg
5/8/b/58bd8cf6e2dbd781.jpg
0/4/f/04ffbcd0b6b499b9.jpg
7/7/9/779b7ee51dec0552.jpg
2/b/7/2b771946b9c15827.jpg
a/f/1/af1c714b180c69bd.jpg
5/7/9/5799139045ddf147.jpg
7/2/a/72a585ac9c429ab6.jpg
f/5/5/f5592a9da73893e0.jpg
9/d/7/9d77e69b70079dd7.jpg
f/6/b/f6b76da2bf3f8f5f.jpg
f/6/a/f6abd77474b0ad8a.jpg
f/c/2/fc2b434f2086f5df.jpg
5/5/a/55a87b3395038e47.jpg
f/3/4/f3451c751b9d1bb4.jpg
b/5/3/b534f84a5989663d.jpg
a/f/d/afd85be806ef28b2.jpg
2/3/9/239978d25ed31c95.jpg
3/0/f/30f358106eb9bec6.jpg
b/6/f/b6fdc3f428472a5e.jpg
4/8/a/48a287b944775758.jpg
6/9/9/69948b5bc11c3455.jpg
f/7/0/f7027ae2db2ce2dd.jpg
c/c/d/ccdf2df97fd962b4.jpg
3/8/2/382f0012e3c00aa1.jpg
1/f/2/1f20302ca2a08610.jpg
9/3/e/93e5f0f9547e210d.jpg
f/d/a/fda69a9b9c4cf4d6.jpg
6/9/6/696b169dae49c46f.jpg
3/7/8/378bd0b6d138d250.jpg
7/a/5/7a58e49f564cca99.jpg
6/f/b/6fbe3afad710ae4d.jpg
7/3/0/730735f47057b9a3.jpg
0/b/7/0b76cc7462692db4.jpg
4/5/1/4518032fbe1531e9.jpg
3/0/3/3038c9d4cb6a97be.jpg
a/c/6/ac63915608501d92.jpg
5/e/4/5e4d37773358e4fc.jpg
7/9/5/7953c6b0b470058d.jpg
9/9/6/99609a2267665559.jpg
2/e/a/2ea216dc5d130c22.jpg
9/f/b/9fb7eb7a4a39dbb6.jpg
a/1/4/a1476f62362cb679.jpg
7/8/7/78740bad496de142.jpg
b/1/8/b18b2c765248f4d8.jpg
3/a/2/3a26b41806e8a235.jpg
5/2/1/521cf651a65e7828.jpg
2/9/e/29ebd51b1110d632.jpg
8/0/6/806a50fd9eb1be76.jpg
8/7/c/87ccf1f1aa06be6e.jpg
4/3/a/43a3c1035cffb000.jpg
0/b/0/0b037e244749ee9a.jpg
6/5/1/651b9682420b3440.jpg
c/4/9/c49cfd77ab2cee6b.jpg
4/9/d/49daeb0a50bc7308.jpg
a/c/2/ac248343a59ab4fa.jpg
f/8/a/f8a5671d6ca0da6c.jpg
d/4/7/d47b228c07c819cf.jpg
5/1/0/510e3a9628b6e61c.jpg
2/d/b/2db9c1a9ea55d134.jpg
3/a/3/3a3a1e0c453c9d04.jpg
a/e/9/ae9aa64f30b80178.jpg
0/3/4/0342bb29c533e1c4.jpg
4/9/8/4988e1c3bb6e4378.jpg
a/a/1/aa13395dfbab0d5b.jpg
7/8/4/7849334608424dfb.jpg
1/5/a/15a647632176159c.jpg
0/c/7/0c73433589e84a0f.jpg
2/b/e/2be26f11631638d6.jpg
8/4/b/84b5b489e3f18747.jpg
1/8/2/182947a2e7eb116f.jpg
4/4/b/44b29b868349c156.jpg
b/1/d/b1d8b3e747a6ea59.jpg
e/b/9/eb9fae9d3fd35b66.jpg
7/2/a/72a4c53ba67313f9.jpg
1/9/2/192c737b6185865b.jpg
9/3/b/93b09dcb151b97ae.jpg
6/2/4/62492582f7e28e35.jpg
8/d/c/8dc323d33150db13.jpg
4/3/9/439270c7cc1150a8.jpg
9/f/b/9fb0613f86c59da0.jpg
3/2/8/32883b6e7b93b7f1.jpg
a/a/b/aab1b9b977b2ed39.jpg
f/4/6/f46885ac8bbffa7d.jpg
3/4/3/34355ed23c287a95.jpg
3/5/2/35235abff7ae1c3d.jpg
1/c/0/1c06404c942ee1e6.jpg
2/c/c/2cc248d6444194a7.jpg
5/e/d/5eda2e37bc4bd109.jpg
7/6/a/76a8cb7bc0327fae.jpg
5/3/f/53fd1895893c0a89.jpg
2/d/1/2d10a3bff5a03f7f.jpg
9/a/6/9a6ca85c9a573824.jpg
2/c/0/2c099e06f716bbaa.jpg
8/a/b/8ab0a1a55073f168.jpg
a/5/9/a598ae954a9f0973.jpg
b/6/d/b6d13689a2262ce4.jpg
d/6/c/d6c5887e3f8f684e.jpg
1/e/5/1e5288147d76665e.jpg
0/c/6/0c61310a388272c2.jpg
e/a/f/eaf64a10a7ceb553.jpg
d/8/3/d839e71deb3d5186.jpg
3/7/f/37f27952da1ff520.jpg
8/8/8/888322398bdcd7c5.jpg
d/0/4/d04b7678078837f5.jpg
9/4/f/94f97161ae87e8d0.jpg
9/2/f/92fb15ec3f0ef64f.jpg
2/d/0/2d05995901548330.jpg
1/2/7/1278ee5814a75032.jpg
d/7/4/d74cda026e63d5ed.jpg
c/1/5/c159e5946f17afe5.jpg
7/f/9/7f9eee08faeb2913.jpg
d/2/4/d24c8a3728b3df85.jpg
a/b/0/ab0f1b765a3339be.jpg
0/3/c/03c574a92390dc7b.jpg
4/4/9/44981972197af46a.jpg
8/0/d/80d5027c2ef5e225.jpg
8/4/e/84e2c8d9e8d745b6.jpg
e/c/2/ec2a10a5e9399921.jpg
c/2/6/c26af984c9512927.jpg
e/9/b/e9b4114181757a45.jpg
a/4/8/a480a2f3919d8e4b.jpg
3/b/4/3b4d8f814720d26b.jpg
2/9/4/2941a9a03849bbcf.jpg
5/2/2/5223c3db733db73e.jpg
1/d/9/1d9e2b9c00266883.jpg
f/3/4/f34fa10ede382698.jpg
f/2/0/f207e472afa30568.jpg
7/b/1/7b17af0fd0cfa115.jpg
7/e/3/7e372671d003f702.jpg
8/4/f/84f568abe3544973.jpg
0/9/9/099053c4c6f2d410.jpg
a/d/8/ad81dcc46463186d.jpg
2/f/b/2fb324eb4efc2b93.jpg
a/d/7/ad735104f7736540.jpg
2/0/c/20cc7a8cc05af440.jpg
9/1/0/910f10675940f848.jpg
c/e/4/ce49587e5bae388a.jpg
d/b/f/dbfb442be21e4e8f.jpg
4/f/2/4f27ed55b289ea07.jpg
5/6/b/56be1d1f5d606fd5.jpg
9/0/2/902f12d87dfce717.jpg
a/a/5/aa5d2cd7e83c7017.jpg
8/5/1/851cc79b9465036f.jpg
1/f/4/1f471f8d22b5db02.jpg
7/a/f/7af1966ba1dba16a.jpg
e/b/6/eb6e69d6788a3e87.jpg
1/8/3/1833988ee4dfb96a.jpg
1/e/5/1e509a9759e593be.jpg
3/2/d/32d41b64a0f0501f.jpg
c/c/7/cc7c20bbc7333b42.jpg
1/b/3/1b3adf9cbfa7d7b5.jpg
3/b/e/3be630843130710c.jpg
d/7/8/d7849e602bcee91b.jpg
8/8/6/8860f6b866054a49.jpg
c/8/c/c8c7b1582de13a92.jpg
d/1/2/d12645ea8ebdee81.jpg
c/5/e/c5ebf7dd63df5e1d.jpg
c/d/2/cd27591c7c0a3785.jpg
5/7/3/573f19caf97ddf5f.jpg
4/b/f/4bf30457cb17eaa7.jpg
6/0/1/601cee23f4f48dae.jpg
5/f/3/5f3d6a298c2b1f77.jpg
8/1/9/8196d25f25208c4c.jpg
6/9/9/6996f573fd461a9b.jpg
b/4/c/b4c35f313d9bc14e.jpg
9/4/a/94a3bd74b2319a4c.jpg
9/d/6/9d620963eb01d3e1.jpg
7/4/c/74c3eb30c034eae0.jpg
1/7/c/17c8cbce497dafb9.jpg
8/8/8/888e0553d59fdece.jpg
b/f/0/bf09630822fe285d.jpg
9/f/6/9f629764e6cb427c.jpg
3/b/1/3b190d545eb262f2.jpg
2/0/d/20d1fc71d0e32e47.jpg
8/c/c/8cc6c147e54de44f.jpg
1/8/6/1869db9173d3c5bb.jpg
c/b/d/cbdda65bf06ab87d.jpg
a/5/b/a5baf1339f28a187.jpg
d/f/d/dfd3afb8fcff1e9c.jpg
7/e/9/7e95bb92cc781e7c.jpg
e/d/f/edf9f026fd8a6516.jpg
d/4/c/d4c0b5cf57776827.jpg
2/2/f/22f488ffcdc69406.jpg
d/1/a/d1afbaa2b4d5d08c.jpg
7/c/2/7c23ae41c40d3acf.jpg
c/4/b/c4bd58a7a3777fb6.jpg
1/d/c/1dcf0f582a693156.jpg
9/0/d/90d97b797074b6f5.jpg
f/3/c/f3cca5bdc308f3bf.jpg
e/3/8/e380e14c48393463.jpg
5/d/0/5d0e3b70043c3e98.jpg
5/0/7/507131b103947374.jpg
b/8/8/b88ee23a9fa4a400.jpg
e/a/7/ea7fdbaf976fe0fb.jpg
e/d/f/edfe595217f15b6a.jpg
f/4/0/f40e61c735e62819.jpg
c/0/d/c0dd81dc0f2f10e8.jpg
0/7/8/078dec58dd8d6faa.jpg
8/8/2/88249a29c72e782e.jpg
9/3/7/937f593a76eaa176.jpg
e/1/d/e1d4366a886bb250.jpg
d/0/b/d0bc9e8e8d7cf752.jpg
7/e/d/7ede686ecdd57c41.jpg
0/d/3/0d3823c88d891184.jpg
9/3/9/93980089311c97bc.jpg
5/c/d/5cd56b2d2389f049.jpg
2/2/d/22d651438b476ceb.jpg
6/a/c/6aca4e451840b4bc.jpg
5/7/2/57237b4adcd0c9b8.jpg
8/4/2/84252116d452b4ba.jpg
e/9/2/e924a4f138a5b8c1.jpg
8/0/5/8057dca351c07f0f.jpg
e/1/b/e1b3b55b6282ce76.jpg
0/d/3/0d3a77cfcec89183.jpg
d/a/d/dada4eb8980c2091.jpg
3/c/6/3c66a519f9d9313a.jpg
1/e/a/1eabbf138c47af1a.jpg
c/6/a/c6a526192db666b0.jpg
5/8/7/587aebcfe4546661.jpg
2/f/e/2fe164e7382fd1ff.jpg
7/3/c/73ce44761bc35e1c.jpg
7/e/1/7e1b9af7b9ee041e.jpg
b/f/f/bff39550b372ac88.jpg
a/4/d/a4dd7a1cc24491eb.jpg
c/2/5/c25cbf6ed347168c.jpg
f/5/3/f5339c89caaa511a.jpg
c/0/b/c0b38a7315fe5416.jpg
2/6/b/26ba6f4edc38d352.jpg
0/1/2/012cad46883a0471.jpg
c/0/2/c02875985e5c9f42.jpg
5/4/e/54e6f579860a1718.jpg
f/e/e/fee3a8596f5995cf.jpg
7/0/4/7042eac2978bf5f3.jpg
d/3/b/d3bbc8faf52a3e1c.jpg
9/f/c/9fc11bde8798bd82.jpg
8/4/5/84581ffe054f9e9c.jpg
3/f/8/3f82bf347dad15ea.jpg
f/f/a/ffa207474296ec39.jpg
2/4/a/24a7f36d0e014e6d.jpg
4/0/1/40125d0a825b7d5c.jpg
c/8/1/c810fbbf4781f201.jpg
0/b/c/0bcc1afaf5a1d410.jpg
7/8/b/78bc890454b35303.jpg
a/a/a/aaa7018ce157aec4.jpg
4/f/a/4fa9e60377b1be60.jpg
e/8/b/e8b8b26990fc9e23.jpg
e/a/6/ea62cec0df5bcb05.jpg
4/2/8/4289cb97a410e3b2.jpg
b/3/1/b317242953c3f59e.jpg
d/8/3/d8381ba6306234f9.jpg
c/0/8/c082c9962ccd29f4.jpg
f/7/0/f70afea30cf03162.jpg
a/7/8/a78109f9d4bfcab2.jpg
d/7/a/d7acf9bf03ad9207.jpg
e/c/3/ec3e32582155d7c2.jpg
f/3/7/f37d288c61697a34.jpg
1/7/c/17cb24070c453328.jpg
2/4/9/249fe2cee3921b1c.jpg
3/0/b/30b8849737b5bcc3.jpg
8/6/f/86f118bfb227986f.jpg
b/f/3/bf3ca6fb857b865a.jpg
b/2/f/b2fa0cfe385d3e5e.jpg
e/b/3/eb39d9a8dee86742.jpg
2/1/6/216769bea257627a.jpg
6/2/7/627935aab2fc295f.jpg
a/d/5/ad56415071efe679.jpg
3/d/f/3df8926661d653d0.jpg
c/b/7/cb7b968dca56de86.jpg
a/c/a/acadb6ee99fe62e6.jpg
e/5/6/e56966cdb7c5b29a.jpg
b/2/d/b2d9e30e928d91e6.jpg
9/c/7/9c79e27dae3ada5e.jpg
e/3/c/e3c78a57dae582e8.jpg
8/0/0/8007d7ebcf284dcf.jpg
2/5/9/2590af90748f5999.jpg
d/d/c/ddc324662c2b9a7e.jpg
0/6/2/062ecbb4ee13069b.jpg
6/2/b/62bb185f49e8ee9f.jpg
e/6/f/e6f8e9a60d342d4a.jpg
9/7/c/97c63c5b18fc4fee.jpg
4/6/7/4674f2d705fbf225.jpg
5/7/d/57d9a71fc204bef5.jpg
6/8/e/68ecfeb55b2f8d92.jpg
a/d/b/adb3571d6d615e7d.jpg
0/8/0/080913fe95eaffb1.jpg
6/1/b/61bc16602c5da9f5.jpg
8/e/b/8ebc8cb21286485e.jpg
9/6/4/964ec57f1b512d66.jpg
1/f/8/1f87e9cd57c034ec.jpg
7/1/4/714eb29fd80eba0d.jpg
c/4/e/c4e10bbea9da7a24.jpg
d/4/6/d46559f081e390ff.jpg
2/9/8/2984dead0dd08377.jpg
c/9/0/c9029009136e4ac8.jpg
3/8/b/38bcde79c2ce84db.jpg
2/a/d/2ad8ee6c70a88488.jpg
5/3/a/53a87423f9fdc2c5.jpg
5/c/2/5c24375695cbe437.jpg
7/f/b/7fbd53b443a0ed1e.jpg
d/a/1/da19b5c3b3347e19.jpg
a/3/4/a34eb778a54f9c0d.jpg
5/7/a/57aa96b372187623.jpg
6/f/9/6f929a5128afe31f.jpg
0/8/e/08eae3f2efc73e1f.jpg
f/1/5/f150bc9e6d198f8d.jpg
6/e/b/6eb447d60204fa7b.jpg
b/9/6/b964b06ebc1d3fd8.jpg
a/d/d/add96c174c08880b.jpg
8/2/d/82d32dde3e8fa8f0.jpg
b/c/5/bc5e6a64768058bc.jpg
a/6/2/a62c10a7bdef9013.jpg
d/5/4/d54eefa268956f3a.jpg
b/d/f/bdf03b15fcf1fe0f.jpg
a/a/e/aae95c9b61a9d882.jpg
2/4/a/24abe7af34370ab6.jpg
0/5/8/0584da51f3add8fe.jpg
9/7/5/975043775e54e6f5.jpg
1/5/7/157bb45e2a0922a5.jpg
0/7/5/0755b8e0d87f7f86.jpg
5/c/8/5c83d14fd7c968b6.jpg
6/b/2/6b252ebf412ef408.jpg
a/e/5/ae5292a49618926a.jpg
2/c/4/2c41925ab36e00de.jpg
c/4/f/c4f9b8d39a54674a.jpg
6/9/0/690d6a0fd33a5ad9.jpg
2/f/1/2f17810814502239.jpg
5/f/5/5f551f2d4c835f47.jpg
d/2/2/d22575ff9258a5e8.jpg
9/0/a/90a62d44afcf1619.jpg
b/b/c/bbcbb6c06f4d93b1.jpg
5/8/f/58facaa1525cdd6d.jpg
6/a/8/6a84797408536bd4.jpg
c/7/0/c70e9f71d449f0c1.jpg
0/c/4/0c45cd895b025f1c.jpg
a/f/a/afad9cafee6a5bc8.jpg
2/d/6/2d6b9622d7c955b7.jpg
9/6/8/968663f6a7a19448.jpg
5/6/1/56100b70a15ee1cd.jpg
c/c/5/cc573a628060dae7.jpg
9/f/6/9f6fbf769dfa0ecf.jpg
b/e/2/be28d3fdc71d5021.jpg
6/4/c/64ce3081a694b097.jpg
8/b/8/8b8cf34ab1c75287.jpg
3/6/4/36452eb247dbed54.jpg
0/2/2/022f2d5cde0d5462.jpg
6/6/1/661ab6ada394cd1b.jpg
a/3/9/a39c4e466c3c4e12.jpg
1/5/9/1595b994ff601d20.jpg
3/d/5/3d59127be15c99eb.jpg
3/4/1/3415e6c27c6ad17f.jpg
7/9/d/79d223dba4bc1f21.jpg
6/8/8/688971531c0d8bdf.jpg
b/2/9/b29b305cc4362930.jpg
2/e/b/2eb1a9e3572d2e21.jpg
4/7/9/4798db89245679c1.jpg
0/4/3/0439851421d52037.jpg
f/5/f/f5fd377eae80e3aa.jpg
c/0/6/c060305a7f55f78d.jpg
6/f/9/6f96777a5c7296fa.jpg
6/b/6/6b6a831d1ae2141b.jpg
5/8/1/581a3d70f2640529.jpg
e/1/7/e1754bc3b7b5c4f0.jpg
3/8/4/384561cc7e30ff1e.jpg
6/e/0/6e00e415840815e7.jpg
4/4/6/44640e70884b965d.jpg
e/7/4/e749f9b29e4a71ab.jpg
2/a/a/2aaa13b21cddab36.jpg
d/a/0/da045144541f1a31.jpg
6/7/b/67be83447067a83f.jpg
8/5/5/855f5bde32dca229.jpg
8/a/e/8ae7ff619dcc9828.jpg
d/d/0/dd024993c3b58c15.jpg
2/8/d/28d136deb20de05c.jpg
4/3/1/431dcc52fb2d2e2a.jpg
f/c/c/fccc0ec049054278.jpg
e/3/5/e35b034f54c07248.jpg
2/d/9/2d94205697d15c3e.jpg
7/e/3/7e34062cbc8dfbf7.jpg
1/1/2/112a4440fb94af7a.jpg
7/5/7/75786e528befa40d.jpg
2/a/0/2a0962d9024f42da.jpg
2/b/3/2b30763cbc512a74.jpg
9/6/3/9633bec5cf2c53b0.jpg
a/0/8/a08c094176f96800.jpg
2/6/7/267fdfb84df87369.jpg
7/5/7/7579abccd3028aff.jpg
9/7/c/97cd8a933a4c4322.jpg
f/2/0/f20ca8eec49578f0.jpg
6/0/5/60549a05bb6c509d.jpg
4/4/a/44a17e71f38bf034.jpg
d/c/b/dcbd4dd60a20e5b9.jpg
3/b/a/3baa8b8dc260256a.jpg
0/6/2/06231a94579a862c.jpg
0/9/4/094d1d360ada1fdd.jpg
6/e/c/6ec7eab0eebd67ff.jpg
3/0/a/30a8864bb8d43f67.jpg
c/e/f/cefeefe0567c74b9.jpg
5/7/9/5796420b587a4ec1.jpg
c/b/9/cb948b8396787351.jpg
8/3/1/83191041bdc2c905.jpg
2/b/d/2bdbe71daefa6f0b.jpg
d/5/c/d5c90f25c6a8754b.jpg
4/c/2/4c29c3cfdb3f42ee.jpg
4/3/7/4374ac34d326fa26.jpg
b/d/f/bdfb003480093ddc.jpg
c/7/8/c78f5f6bf63487c5.jpg
4/f/e/4fe224c02a8a1713.jpg
7/d/a/7daca977bf523708.jpg
e/9/a/e9a975df1280c032.jpg
6/a/6/6a6c220472e913e6.jpg
f/6/c/f6cb3e2ea0d0ecc4.jpg
8/3/f/83ffb7c3becf97d6.jpg
9/1/5/9154f53293d08e37.jpg
2/8/b/28b04137fcaf8b2a.jpg
6/3/2/632c634104dda5fc.jpg
c/e/5/ce5f55d1ea839131.jpg
8/2/7/827e8a67944742e3.jpg
b/5/6/b5652535e3ab981c.jpg
b/9/6/b96a8f1c9e28e407.jpg
f/d/4/fd4b898f832e61f5.jpg
0/5/e/05e0de2b0c07c456.jpg
c/e/8/ce85a2cfa470a2fd.jpg
1/3/b/13bb4cbfcdd4b634.jpg
4/f/d/4fd372bd291ae021.jpg
3/0/3/3037f84e0d906d21.jpg
f/a/d/fad799796ae5754c.jpg
2/4/c/24c51073fd370e9a.jpg
0/4/6/046422ca75d0d97f.jpg
b/3/b/b3b2b02b90d5ed9b.jpg
a/7/7/a77372c6b50e24de.jpg
6/a/2/6a29c71f6f753660.jpg
2/7/8/27853c08acd0fbed.jpg
c/b/5/cb52aae77efebe19.jpg
0/6/4/064d125aafd2b711.jpg
b/8/8/b88f33b9caa54dcc.jpg
2/8/9/289260ddde8d4ecf.jpg
4/1/6/416c4f288c45f47e.jpg
e/6/1/e614d89e70348d38.jpg
e/1/0/e10aa3695900181e.jpg
8/6/7/8676b10be3247894.jpg
7/8/5/785e3ae30ab6ca6e.jpg
9/a/3/9a3f7113eb0fe90f.jpg
f/6/d/f6ddebad6b1f1e1f.jpg
9/d/c/9dc24df7209f4559.jpg
2/f/6/2f6ae3b471aca6e4.jpg
4/7/7/4770d82ed72f44b2.jpg
9/0/1/9018a1c6cc7284b4.jpg
d/b/4/db459ddd8b0911e8.jpg
6/4/4/644f3cb2fbf78939.jpg
b/2/4/b24ca288a9631abc.jpg
a/e/9/ae9dd2a19bb154cc.jpg
a/2/a/a2a3eadc3f4c1452.jpg
6/d/1/6d131473e50ca172.jpg
4/e/a/4ea85e64d062478d.jpg
8/e/5/8e5c644f59bb8a9d.jpg
9/c/5/9c5969108af50282.jpg
c/9/9/c997e8bd6856b4f4.jpg
1/4/3/143c291071c03d85.jpg
9/3/e/93ea117f8a83c0db.jpg
6/b/e/6be846df067a5905.jpg
f/6/b/f6b9fa3093a116bd.jpg
f/b/8/fb8c000534cea615.jpg
d/2/f/d2f3f2ace216c4f8.jpg
9/c/5/9c54a5803e67fa45.jpg
1/f/4/1f452394287b266a.jpg
5/9/9/599bb11bb2a80709.jpg
7/0/8/708bf2c186b0244f.jpg
4/b/4/4b49ce3c14566460.jpg
e/c/3/ec3660d4369bed45.jpg
f/b/3/fb3a14ae00755ca2.jpg
0/8/e/08eda158688948a4.jpg
5/d/0/5d03710ba371b3a5.jpg
2/c/0/2c0bac7c6847e004.jpg
e/4/1/e41b540d8d0147be.jpg
5/1/8/51897288f87baa7a.jpg
8/d/c/8dc70b251f865e88.jpg
c/c/e/cce6a79f6156bb70.jpg
5/d/7/5d73aeb4111668f1.jpg
f/2/7/f27b6b61624d383c.jpg
6/3/8/638d97ecf1baac98.jpg
a/7/7/a77698b18db47523.jpg
a/1/a/a1a823ddada71495.jpg
3/f/1/3f1e1721db47a311.jpg
7/8/8/788033fbfe919648.jpg
d/0/6/d06f8b60c4d2b0ad.jpg
0/c/1/0c1f429cdcf61550.jpg
4/1/4/4146d52712c3d841.jpg
0/5/d/05d28addda08c303.jpg
2/8/f/28fb552ee2b1ceae.jpg
d/f/9/df9c2b6a6dfa2dfa.jpg
c/b/5/cb526ff98c5d5ef7.jpg
2/8/a/28aa448db260c29f.jpg
1/d/0/1d0a6f738adb9fdd.jpg
1/e/c/1eccdea8d2392ef0.jpg
f/8/c/f8c25bf1ca770365.jpg
3/1/6/3163d2bb354d4ba0.jpg
b/2/7/b2755060cca8e969.jpg
5/a/7/5a7d4289a52f0f9a.jpg
4/4/6/446c7a1f8213685d.jpg
8/9/a/89afc57a70a631ea.jpg
c/8/f/c8f1f07e3ec0bccb.jpg
6/9/a/69a463bae88b48b4.jpg
7/3/8/738c896ebf4dd485.jpg
d/8/d/d8d2768b560157b6.jpg
e/5/f/e5f30c3efe1f7f63.jpg
4/5/e/45efcfed8370367f.jpg
1/6/f/16fa50828a410821.jpg
8/7/e/87ea7879f1842745.jpg
9/9/4/99475057a315b0b0.jpg
c/5/a/c5ab25fd7624c6ea.jpg
8/e/9/8e9e173da2a70b17.jpg
7/0/f/70f93bdb205f5cc6.jpg
f/f/3/ff32fab5cea1bae4.jpg
6/8/4/684cc0b2bc3d108e.jpg
2/b/9/2b97c773cbefbcbd.jpg
c/5/3/c537b35f55a0fa3a.jpg
6/a/4/6a40e1a7216b6c92.jpg
4/e/2/4e204f23937a64f9.jpg
0/9/7/097896a2cffed604.jpg
0/8/f/08f7dc45226fdd55.jpg
1/f/1/1f106baf76520ed3.jpg
4/b/a/4bae9350ec7339e4.jpg
c/8/1/c8109b1c5d364659.jpg
b/6/b/b6bb40fcf76591ba.jpg
5/d/3/5d3942aad4ddf769.jpg
0/7/7/077978d7046eefc4.jpg
c/6/2/c62b48e3041a055f.jpg
e/1/0/e106adf143ca0ca8.jpg
a/a/b/aab5662d641006a3.jpg
b/b/a/bbafb21c38af8d38.jpg
1/0/4/104430fdb944711c.jpg
a/b/4/ab415a4bb8855dd7.jpg
6/1/8/6186a41958e19c2b.jpg
b/b/c/bbc27a2732e4200b.jpg
4/3/b/43bffb8c65503584.jpg
b/5/e/b5e2dbe63df4c6e5.jpg
0/f/0/0f01f040d86e1069.jpg
c/8/c/c8c28152e5ea8c6a.jpg
8/7/1/871f48f855ad9ad8.jpg
2/4/d/24dae8ff75cd7dcd.jpg
1/c/4/1c424a5e4ded8936.jpg
a/7/d/a7db6a7aa66b1ab9.jpg
2/1/f/21f447fec0a25bdf.jpg
b/1/f/b1f4d90e300419f0.jpg
1/a/f/1af68ebd0465de29.jpg
e/6/e/e6e345171717018c.jpg
3/c/3/3c36385a9c4a5a46.jpg
3/d/d/3dd12a2f55f36f71.jpg
e/8/a/e8af09647b21de2a.jpg
d/e/0/de0a5090310c6daf.jpg
a/9/e/a9eb9674787e7dba.jpg
4/6/4/4641cfc738d3df79.jpg
5/d/7/5d7eb75e5fe6ebfa.jpg
c/f/b/cfba8654ef6c363f.jpg
6/8/8/6889b79caae840db.jpg
c/5/d/c5d4e7edbbed263a.jpg
3/a/5/3a5b8012249b5e9b.jpg
f/0/2/f022c592a4aaebd8.jpg
e/f/f/eff27721097ed30d.jpg
1/2/a/12ab59371271e704.jpg
9/9/1/991823f882e4e163.jpg
d/5/6/d568f461b865791d.jpg
1/b/9/1b9e2e11552b9565.jpg
f/0/5/f0557e6343cfba2d.jpg
1/5/7/157eb95cd0d4215a.jpg
e/c/7/ec7076fe5e5a5132.jpg
e/e/8/ee8921bdc5557107.jpg
4/d/a/4da2f6e1dcd326fb.jpg
e/a/3/ea3dea3112de6cdb.jpg
4/8/3/483cb64570803ad1.jpg
6/a/7/6a740253acce615c.jpg
5/a/d/5addeb9a58dbe20d.jpg
4/1/2/412680b908f12529.jpg
5/6/a/56a8b89db09ea2ba.jpg
6/8/8/688c8ba202673285.jpg
e/6/d/e6d59d44efc0cb12.jpg
9/e/8/9e83117e68fa7ca4.jpg
c/b/1/cb1c9881c302ce9a.jpg
d/8/5/d85a0d08af521229.jpg
5/5/e/55eda63f983afc8a.jpg
d/6/d/d6df05dffa39315d.jpg
e/5/1/e517cf3e29da86fc.jpg
6/5/5/65523cd7923c7d9d.jpg
8/c/e/8ce10b435cb84d96.jpg
3/6/c/36ce4a2e3a087563.jpg
6/e/a/6ea9042edf507678.jpg
3/1/f/31f3ec3341a960dd.jpg
c/d/b/cdb5e9a926160c12.jpg
b/b/b/bbb5c7e7cf7b92cd.jpg
b/3/1/b3130eac0b91a0e0.jpg
8/4/c/84c2772568990f1a.jpg
9/8/e/98e5c22a64d40739.jpg
1/f/4/1f4044727893c8e4.jpg
7/f/a/7fa32e13ce636c21.jpg
5/7/6/5763f559968f97df.jpg
2/c/e/2ce7a6875988abe5.jpg
a/a/8/aa831a36ff2b8cd4.jpg
4/5/6/45604496c4243247.jpg
2/e/d/2ed0f4ac9c29429d.jpg
8/c/7/8c7e29c2023c7d69.jpg
3/0/a/30a16936687182a6.jpg
c/8/1/c81c4aa2aeed39a5.jpg
9/3/1/93150ce82e48ba29.jpg
2/0/4/204521fcfa060917.jpg
1/6/d/16d01155395f03cb.jpg
c/b/9/cb9ec0e76a8f08f6.jpg
f/d/1/fd1686211dbc15e8.jpg
1/0/f/10f64f48ef5ee2fb.jpg
1/a/2/1a20913041181632.jpg
c/3/0/c30db7347c5bca02.jpg
4/d/8/4d82ed88af6c6be7.jpg
6/1/f/61ffa6bcef622c4f.jpg
8/c/1/8c125a71ee8fbed6.jpg
3/e/9/3e9b10df98210219.jpg
5/e/a/5ea652ff248fa7f1.jpg
f/3/5/f35de44fdd994fe5.jpg
2/6/1/2617c3cdc4d582bf.jpg
5/9/b/59bdca78260fca8a.jpg
6/f/c/6fcf25567040e155.jpg
6/1/1/611532bc56ff654e.jpg
f/0/9/f09e937c2403979a.jpg
0/3/8/038e5c8b3efe1da8.jpg
e/2/3/e237ffc30e76b872.jpg
0/d/1/0d115791b1b55535.jpg
6/0/0/600a8cb363c767cd.jpg
f/1/0/f10a10c94ea86a7d.jpg
4/9/d/49df40b5bb66aec3.jpg
7/3/f/73f7c2a3a0e28424.jpg
8/e/5/8e5e8705b0998059.jpg
5/e/a/5eab92de3e3bf635.jpg
b/c/8/bc89ed51f72cc3a8.jpg
c/d/8/cd8657f085c8df0e.jpg
d/c/0/dc06bf7688699034.jpg
8/9/d/89d755fd34c99c49.jpg
7/f/3/7f3fc24c7ddd0bd5.jpg
2/5/0/250a010a4dd4481c.jpg
f/6/f/f6f87289c73dc873.jpg
e/8/a/e8a2e649f9989701.jpg
4/a/0/4a09cd4dd984d0dc.jpg
0/5/d/05d90fb3db0d5340.jpg
2/7/d/27d9464289999ad0.jpg
b/f/9/bf9c0b882a4c3675.jpg
4/f/8/4f82a9c7f2236e24.jpg
a/0/f/a0f08aea4ee69dab.jpg
5/2/9/5294d92f7a0651f8.jpg
b/d/e/bde9aa37a194655e.jpg
3/5/c/35c232a22479d18d.jpg
d/9/a/d9a01a6fd5b591ee.jpg
5/4/1/541f3edd4705e846.jpg
3/a/9/3a95c9a488873820.jpg
e/9/3/e93685dfcd706065.jpg
5/e/0/5e048a280d758848.jpg
6/b/8/6b8fe31c56a25b6e.jpg
1/e/8/1e8acc9fe98f35ff.jpg
c/a/e/cae53e2b7e26287a.jpg
f/6/4/f64f168a908e66b3.jpg
e/9/c/e9ced6bbd4b988ec.jpg
4/9/3/493ff9fecc0c67f1.jpg
5/f/7/5f7123d71382d395.jpg
a/d/f/adf0d5ff9992f5bc.jpg
9/6/9/9694eb790f0aa6cf.jpg
a/3/c/a3cd1a1b980b41e5.jpg
d/a/c/dac30a0b9f9338cf.jpg
c/9/e/c9e89458553105c0.jpg
2/e/6/2e684cb6c5d8a0e1.jpg
5/6/d/56da7e68e878fe7f.jpg
9/d/6/9d6d0c89fafb7e2c.jpg
4/7/8/478d72986e97f225.jpg
0/8/a/08aea827a5833f33.jpg
3/f/1/3f118dbdd524d0dd.jpg
1/7/5/1750ac80cd128a62.jpg
6/8/a/68af9b68b47b6bb3.jpg
3/7/d/37d3d828735a44ee.jpg
f/3/6/f36d496d9e57ada2.jpg
5/2/9/529e3c479783c930.jpg
3/3/a/33a92ecdaad90b3e.jpg
6/a/d/6adea4df65b81f63.jpg
3/f/c/3fc99856f8293cd3.jpg
2/6/1/261b04251358a9cf.jpg
9/7/7/977f96f28f48103f.jpg
6/f/5/6f529b96cac59353.jpg
d/8/5/d85c1caf5e37bc2c.jpg
6/8/e/68e6f62d87e390d5.jpg
2/1/5/215505dbcd5e8376.jpg
1/a/c/1ac50ae271c9f975.jpg
2/d/a/2da68a1f96066918.jpg
e/1/5/e15bd2d00c9fddad.jpg
3/c/7/3c7f8710e2d3e1d6.jpg
7/5/8/758d22f08ab89ccf.jpg
7/d/5/7d54618ab763e5f7.jpg
2/b/c/2bc3bef5a4a1ee36.jpg
3/9/9/399c138ad9c89fe2.jpg
b/8/8/b8860eb6a252b244.jpg
f/9/2/f927862996092595.jpg
6/c/f/6cff4e5f86eeb02a.jpg
4/8/3/4839b846bca30245.jpg
0/d/0/0d0a17e2c3455d56.jpg
1/8/d/18d8c67babef4410.jpg
a/6/7/a67f03ac4a65b6d5.jpg
9/5/c/95c8c66e1b82a6b7.jpg
e/3/4/e34c03e5a7d170cf.jpg
b/b/8/bb8d550a2d81cda5.jpg
a/2/4/a24606993464d1b9.jpg
f/b/b/fbb1b96a034436c5.jpg
b/b/a/bba8476acbb2ed18.jpg
5/e/8/5e8fdd8fdfd70238.jpg
b/a/9/ba9c9696ef5ef1fd.jpg
3/b/4/3b46f36e2e5ab48c.jpg
8/e/5/8e545489ddd6b42e.jpg
0/9/4/09484bcf16c6d6c9.jpg
6/9/b/69b4b79fa60e02ed.jpg
4/a/6/4a61c981ca39184f.jpg
1/d/1/1d158ad364dc789c.jpg
3/5/f/35f38ffba90e955a.jpg
9/a/5/9a52eccf84ef9859.jpg
3/e/5/3e545d92a3f535ca.jpg
9/0/3/903032dc9f120a0f.jpg
f/2/b/f2b69112e42f1065.jpg
a/a/7/aa79615479e50cb6.jpg
1/1/a/11aeacba4657e5d6.jpg
6/a/d/6ad3fd326aa75a6c.jpg
b/c/c/bcc9bfb1bedb0bc9.jpg
f/8/4/f8470c603f7643c5.jpg
3/8/8/38860a4f5eebe0ba.jpg
a/d/1/ad1a346470629ab2.jpg
3/3/a/33a891b42aecb518.jpg
b/a/4/ba4e86d18587c232.jpg
6/9/8/698784a9ef8ba728.jpg
3/6/f/36f3669c6d01bee5.jpg
4/d/0/4d009e156630fe7e.jpg
c/b/7/cb7e0d036835acfc.jpg
a/c/b/acbb7dead1a70f6d.jpg
e/3/a/e3a816375f16c3c0.jpg
f/c/1/fc11929ea1b4381d.jpg
8/7/a/87a1521458f3be96.jpg
4/f/6/4f6ca73c2a13e420.jpg
8/1/2/812e190f9d68b072.jpg
4/7/a/47a89f8a630c686b.jpg
3/e/e/3ee3f0f77f996ab2.jpg
b/f/7/bf701cfda09b46d5.jpg
3/d/0/3d0ffa57521a3a97.jpg
2/e/f/2ef5170e3869880d.jpg
b/7/3/b7301b62b37e7009.jpg
9/6/8/968e320ef0b14378.jpg
0/d/5/0d51a3c43959ee7d.jpg
0/a/0/0a02313be92d4fef.jpg
0/7/3/0733ba126cdba6a4.jpg
7/c/d/7cd1a3a064284123.jpg
0/8/2/082cbfc03ecffbef.jpg
7/9/5/7958ed90230649f6.jpg
e/c/a/ecad68d5c3c200cf.jpg
2/8/1/281ca25dbdfe6ec8.jpg
6/6/5/665e1bb19702ab26.jpg
b/6/1/b616bbe65fd27d87.jpg
8/0/5/805a9e556ee6dea2.jpg
3/e/6/3e65d03655551ace.jpg
b/4/4/b44aad748e7d0b39.jpg
8/e/6/8e6fcf6c75b7d986.jpg
4/0/3/40367dbd0c3c019f.jpg
d/7/2/d72e326280fc703c.jpg
4/7/2/472e01351eb4c72d.jpg
9/a/5/9a556274bb60bc3d.jpg
e/6/2/e62a559f2a239471.jpg
5/c/1/5c1f0fe6b0c0717b.jpg
1/e/8/1e8b56caa9f39317.jpg
4/4/f/44f4b1838fa70bb7.jpg
9/1/4/9148c90e6e992077.jpg
f/f/f/fff057f7033874d1.jpg
3/a/f/3afe265e19453495.jpg
6/a/9/6a9991f9cf223a51.jpg
c/0/2/c02bfdbfbc915c73.jpg
9/6/7/9675f8d6db5d8000.jpg
f/6/9/f6952e527e4f8ca9.jpg
e/8/7/e8750000b01419e7.jpg
3/0/f/30f7c9c84126d8f6.jpg
7/0/c/70c2427f48edd832.jpg
2/f/0/2f00775a95520e31.jpg
0/3/3/0331dabe3174b534.jpg
f/1/3/f136a5439619bbc8.jpg
a/8/1/a81416a5c294aa52.jpg
4/b/4/4b45b6e64d5d2231.jpg
1/6/a/16ac3e9c3e91523c.jpg
9/d/4/9d4baa1b16188ad4.jpg
1/9/c/19ce5685f675309e.jpg
a/3/d/a3d9edeb9b401ad6.jpg
0/4/4/044ed64b40178251.jpg
1/c/a/1ca0c5d861f5af5f.jpg
b/0/3/b036616f2c52aba4.jpg
4/8/5/48558aad57fae858.jpg
7/8/f/78f3973b855381e9.jpg
c/9/d/c9df3c04c7c19b57.jpg
3/9/9/39900fb66c2e271b.jpg
2/a/6/2a6c3bb405fdb8b3.jpg
3/d/0/3d04d1c747c8b6ec.jpg
e/0/a/e0a8e79b47572ecb.jpg
8/5/0/8505f3e920d0f7f3.jpg
4/8/8/488d0fcee4339aeb.jpg
2/f/f/2ff17e0ef49205fb.jpg
1/8/5/185e9b2b3a4458ed.jpg
8/3/c/83c86b3f1d982eae.jpg
5/3/2/5326d3c4e8988557.jpg
2/d/9/2d92cfbf84b5a7d5.jpg
e/d/b/edbea83b5293a0e9.jpg
9/b/2/9b2366e690f9c5e6.jpg
0/3/9/03963fbdf52d1160.jpg
a/a/d/aadd814a09c48b6e.jpg
9/a/9/9a99da2e54b2955c.jpg
3/2/6/3265c13f3bbe533d.jpg
9/6/8/968a76b5b83ddd69.jpg
c/6/6/c66a737725882432.jpg
c/9/8/c98315a784c00ed5.jpg
2/7/e/27eb08561fb18303.jpg
c/0/f/c0fe97433cbcd323.jpg
e/8/9/e89bf10376350ee1.jpg
8/2/8/8289e86dc332a8fe.jpg
8/d/8/8d891a8c34719f5b.jpg
2/f/8/2f8a775a7f098c5d.jpg
1/a/f/1af94fa5dd5a15ef.jpg
b/2/e/b2e2bcf72b7c3f41.jpg
f/f/8/ff849106102050f7.jpg
5/5/6/55633bb392ac05d4.jpg
d/6/3/d63e23abcf199aa0.jpg
b/7/d/b7dadb45e5318141.jpg
a/8/7/a877a75ffc897803.jpg
7/2/7/727c1d78d9641c43.jpg
f/7/9/f79a44262d05467d.jpg
6/5/e/65e89f3516a0ddff.jpg
d/4/c/d4c4bfa56060beba.jpg
e/5/3/e5324ffbe584ec69.jpg
3/b/9/3b9c2211ad7857c6.jpg
e/8/c/e8c6c13577da95b8.jpg
8/8/4/8845948e06acbfbd.jpg
a/4/8/a48c6781471bb9a2.jpg
4/a/7/4a7825ed5bc01e4a.jpg
1/b/f/1bf02b986f67d64a.jpg
9/0/3/903035db7f4fe3ed.jpg
f/f/1/ff1f4824de544070.jpg
7/b/6/7b67b6923bd86e17.jpg
0/7/1/071681e05c2bf671.jpg
5/e/7/5e77de9928dd50bf.jpg
d/2/7/d274bca77a0dcc71.jpg
d/1/d/d1def2f490d4190a.jpg
4/8/0/480b1d45be852451.jpg
d/6/1/d61d7fd99d723419.jpg
8/6/3/863724e7623969e7.jpg
9/f/1/9f1199ab87c7f690.jpg
4/9/b/49b75963d67c86a4.jpg
2/3/7/237a057d502460ba.jpg
4/d/6/4d67435678704333.jpg
a/8/c/a8c3693ca0eb587a.jpg
3/1/5/315273406b328cc7.jpg
7/5/e/75ec91c31407c6cc.jpg
3/b/8/3b8e4ffd037f64c7.jpg
e/7/d/e7d96393131786aa.jpg
1/5/9/1595bfd9b86f4db2.jpg
6/9/d/69dfadcf03a690a4.jpg
5/4/1/541bb287d487f60d.jpg
5/a/8/5a8c6a17bbb2ac15.jpg
e/8/4/e847098efdb278f8.jpg
a/5/1/a51733f53e54b57b.jpg
8/d/4/8d444d7b7f904f78.jpg
7/7/f/77f8217fc4c1c6b2.jpg
4/7/9/479b063eabcf1cd6.jpg
3/e/9/3e9a965188359b86.jpg
1/d/6/1d6a1969277ecdda.jpg
d/f/9/df95b75b9f4fc89a.jpg
9/2/d/92d85ece4204ff36.jpg
2/b/b/2bb3af6d2348bb2a.jpg
d/0/6/d06d4a8c91048296.jpg
d/2/c/d2ca1c0f1473c610.jpg
d/4/5/d4553999ca407aa6.jpg
5/9/c/59c913ac6b6ba980.jpg
7/7/6/7765d662fa0a18c0.jpg
e/9/e/e9eb4329f1aab20c.jpg
8/d/0/8d02a44364b42491.jpg
9/3/c/93c99b21d1982022.jpg
7/7/4/77405e893bfcd064.jpg
d/b/1/db1533c7eef2c754.jpg
5/3/b/53b7bf7453d0035b.jpg
7/1/3/71331979c4eaa626.jpg
8/b/a/8ba1c3b05d7988a0.jpg
e/6/b/e6b7c5b55710c200.jpg
4/3/c/43c9886ce4b181cc.jpg
a/f/6/af6a3139c9823453.jpg
d/7/0/d705c90438cb7505.jpg
e/c/f/ecfcdb3ceca8c167.jpg
4/5/b/45b70f50e6cbe9c9.jpg
5/1/c/51cf8d0c7f672d1d.jpg
a/1/c/a1ceee141e0861b0.jpg
1/5/7/15732f66ba1d2118.jpg
0/a/f/0af56f11fafa2ba0.jpg
1/7/b/17b1291e8adcde95.jpg
9/e/0/9e01c1106a141d4b.jpg
5/f/d/5fd8c96316e770e8.jpg
c/2/0/c205752c67507e13.jpg
e/2/6/e265f6fca474dfd3.jpg
6/c/1/6c1f4d8b9f47824e.jpg
0/6/e/06eba92f930bf947.jpg
4/5/9/45936042a2c71bc0.jpg
0/7/1/07162b550fc99ae0.jpg
2/0/0/200d7a30bd82ca13.jpg
6/8/e/68e9053a3a5bdad1.jpg
4/a/6/4a6bcd69eb1dc430.jpg
a/a/8/aa8fe24506266e56.jpg
9/1/1/911c31bfddd0602e.jpg
c/8/6/c86ed4785767e88f.jpg
9/e/5/9e5cdbe80604be5d.jpg
f/7/a/f7a57a7f50137c24.jpg
6/c/b/6cbfcdfa8f0c9a9b.jpg
3/e/5/3e535b956b3081cd.jpg
0/1/a/01a69e0a9c250a1d.jpg
a/4/6/a4640bd5574d0349.jpg
d/9/b/d9b20715300da979.jpg
5/a/6/5a6b4468c80fffa6.jpg
6/7/b/67b4b14e4cb89589.jpg
d/d/0/dd0ce49629495615.jpg
8/6/6/8666ea0362b26aca.jpg
f/7/5/f75dc2fec5cfbd56.jpg
d/0/7/d07193f83c4415ed.jpg
c/8/2/c82a037fc15cfffb.jpg
4/2/b/42b034097f09c754.jpg
5/c/7/5c7c4c4da03ef155.jpg
9/8/3/983b7c2744354327.jpg
d/2/b/d2b017659943fc62.jpg
1/d/2/1d298617734dba69.jpg
0/7/2/072bc3cc985a8556.jpg
1/3/6/136376a15e3afcbb.jpg
0/7/3/07335cabb2a69405.jpg
c/2/3/c233e93d285eac11.jpg
e/0/1/e01fdd7a4120e323.jpg
e/7/c/e7c833778eebaff6.jpg
7/e/a/7eaadfec130e802a.jpg
2/1/9/219202772eb9ad45.jpg
4/a/0/4a09e477524ad1e3.jpg
1/a/9/1a97e2d891b8dad8.jpg
9/0/f/90f755f2b661b8a5.jpg
8/8/4/884e33a6c7b6c555.jpg
2/0/c/20cc66282c914670.jpg
0/0/1/0012211c03d663d1.jpg
d/f/f/dff88b128ad980ef.jpg
c/1/1/c1145fc0d1b2caf7.jpg
d/e/f/def392c9b802d3ec.jpg
5/d/4/5d4b6811f421af69.jpg
8/b/8/8b800574fd081120.jpg
e/d/d/edd69fde59fa1edb.jpg
4/4/9/449feccac68b96c0.jpg
1/c/1/1c10c98b4460d106.jpg
3/2/4/3243f3da775df9cc.jpg
8/3/1/831c785281ad2263.jpg
c/3/3/c336c9980a983006.jpg
5/5/b/55b88d4006682628.jpg
8/6/8/8687bcbaba59238c.jpg
a/a/9/aa911d358af12000.jpg
4/3/9/4394c41ab9567039.jpg
f/c/d/fcdd07380f656a79.jpg
7/7/8/7787e3fa8352b138.jpg
b/b/7/bb7b6096dca44a6a.jpg
0/f/e/0fe5906b5e1da470.jpg
d/1/b/d1bb46abe2f8ab47.jpg
5/d/d/5dd8c6b24cf2750d.jpg
0/9/f/09fe9075d0239ca9.jpg
4/9/d/49d5a2e0e23ecf90.jpg
e/4/c/e4c9c51438d14ccb.jpg
b/c/a/bca403ea228d9cb2.jpg
3/a/b/3ab6a62977263570.jpg
9/c/b/9cb7e57d056db8fd.jpg
f/c/7/fc7d745d258d22c4.jpg
3/8/3/383c81b966b93ca9.jpg
5/7/f/57f893d97e43f822.jpg
5/9/d/59dfee95306f799d.jpg
3/a/3/3a36a9ef1a9d0ba2.jpg
e/0/f/e0fa020c7c23dd64.jpg
5/9/d/59d65ab9a542a8c6.jpg
0/a/6/0a6f5bfb11f2df79.jpg
8/d/2/8d2913c42d00b754.jpg
a/5/b/a5b081ed688da728.jpg
a/8/a/a8ac6ff49a30436e.jpg
2/f/6/2f6750409fd5a924.jpg
0/1/6/016b3b82e5c57000.jpg
e/0/9/e09b3354fa7de7c1.jpg
a/2/3/a23a78778cf68513.jpg
a/5/7/a57e370b92118230.jpg
7/e/1/7e17cd43e7314921.jpg
2/7/a/27a4c67c8386b6b5.jpg
c/7/9/c796e27928e3682f.jpg
1/0/1/1018c97326307a63.jpg
a/c/d/acde2e8b2971bf4b.jpg
1/e/3/1e3fa6ceaff2af33.jpg
9/1/3/9135178d1c68ae41.jpg
1/c/5/1c59341dcc69dfaa.jpg
6/6/8/668c89b28d387ddc.jpg
d/d/d/ddd21a8730510be8.jpg
8/3/2/83292bc919a95df8.jpg
3/a/f/3af2ee095157791d.jpg
9/d/5/9d5b209d076567b4.jpg
6/3/6/636ad4119b87253b.jpg
b/8/6/b86e3b9ccfbd1e37.jpg
5/f/a/5fa8f274094c8b58.jpg
1/8/8/1883957b9cc8d1ae.jpg
e/1/7/e17bedee845be1b2.jpg
6/e/a/6ea099d9f2ff6c09.jpg
1/b/9/1b9fce546f3a8923.jpg
7/5/2/7524b451508899e6.jpg
a/f/b/afb32a0b7b092495.jpg
5/8/2/582ae1f9a668f47d.jpg
4/e/4/4e4c88a13379d5e1.jpg
7/2/4/724f5350c8406f87.jpg
2/6/3/263ab7e52a6412eb.jpg
7/7/6/77666a54b31a7b77.jpg
9/f/4/9f435704aa710e4b.jpg
0/0/f/00f6215719bd34dd.jpg
3/9/a/39a53924af6df444.jpg
9/4/1/9411d0bbaf60342d.jpg
0/3/2/0328d0039b61d8e8.jpg
b/9/3/b93804854e4505b6.jpg
b/0/1/b0155c75dc819521.jpg
d/6/3/d637422793cd521c.jpg
0/6/7/067553aa9f5a812c.jpg
b/d/a/bda709f2ea0c059f.jpg
1/5/a/15a50557e019bdd4.jpg
c/f/d/cfd8b168d48de4ef.jpg
2/2/9/229c9ed025134869.jpg
1/c/a/1ca512a3acac3e6a.jpg
5/e/e/5ee73d82ec4ae707.jpg
3/f/4/3f42848e25a9d780.jpg
6/9/d/69daf04dd12ff970.jpg
5/a/3/5a36b23b229c090c.jpg
3/d/8/3d8e81cbf68496fc.jpg
0/9/4/094ecd1d0c354973.jpg
7/7/8/778a91f268bb20f6.jpg
7/8/2/7823c66955d5ea95.jpg
5/4/4/5449080713576b5a.jpg
2/5/8/25831b6a1e163f61.jpg
e/a/4/ea4a8b9c111a89ba.jpg
8/c/f/8cf5acbc05b30583.jpg
9/7/c/97c2f836c5f042d3.jpg
9/b/b/9bb84924fd656a6a.jpg
4/5/6/456a455c5129027c.jpg
e/9/c/e9c7ba9873781445.jpg
e/2/e/e2e81840a085f739.jpg
b/6/1/b617fd52e56f3915.jpg
3/9/4/3948c35f5baf4c19.jpg
1/9/4/194ed4cd75e168d5.jpg
0/8/2/0822978a6465486e.jpg
9/7/7/9770abb273f527c7.jpg
7/6/f/76f18e0c04e56003.jpg
e/1/c/e1c80f77da904ee0.jpg
7/9/d/79d034850513408d.jpg
3/7/3/3733da7e83fcb855.jpg
4/9/4/4946a1f4eb558bbf.jpg
b/3/3/b3376440d16ca8ab.jpg
8/f/3/8f35d228787ab486.jpg
d/9/6/d96fa8de77c391c1.jpg
5/6/6/56662e019cc88121.jpg
a/8/3/a834737aed32f246.jpg
8/b/6/8b60e5546c5d32de.jpg
1/0/5/1056f9ee38f601d0.jpg
a/7/3/a73bedf20a6e91c7.jpg
e/c/f/ecfc1c98c077b5dc.jpg
e/1/3/e136288f7f69e162.jpg
b/c/2/bc283d2e7651d7a6.jpg
8/c/9/8c9f399a653ddd68.jpg
c/9/6/c96a533aef51cdea.jpg
d/f/2/df28fb478a2f96fc.jpg
b/7/c/b7c43326c17de732.jpg
e/9/3/e937263f5db00c8c.jpg
3/d/1/3d182928c3ab86b7.jpg
a/f/8/af8dbf8ac2b37b05.jpg
d/6/8/d68445f41f242b70.jpg
4/6/b/46bdd3de75ea0a90.jpg
c/5/0/c50c023887ad7fbd.jpg
f/a/0/fa00a6ed778333f0.jpg
3/b/4/3b485265eeca7c7c.jpg
2/3/8/238f05cd76815b2a.jpg
5/3/0/5306a05d5549ef6f.jpg
2/e/d/2edd7d51be252a7a.jpg
e/e/b/eeb7bed4d1ab1224.jpg
5/b/8/5b8fa29fd078f5f7.jpg
e/0/3/e03da7b6d33c360a.jpg
2/3/f/23f7cd1d0f3fe272.jpg
b/f/9/bf9b1d2d8100b9eb.jpg
8/e/2/8e22b6d23dbf31d9.jpg
f/0/d/f0dee0a3cfea7300.jpg
4/a/1/4a1227c30207162f.jpg
2/0/a/20a7ae84a801d467.jpg
c/a/c/cac7ad3b36a018a1.jpg
0/8/7/087d2ba1e351ebc3.jpg
d/f/6/df6e7848f76b3d90.jpg
4/e/e/4ee8609b2ee89b76.jpg
7/d/8/7d8885d1b2468c41.jpg
2/1/8/2186cd5aef2fe099.jpg
e/7/9/e793ecaa6b085d67.jpg
8/e/7/8e7c268da9f294f6.jpg
3/4/0/3409bd9185b57468.jpg
d/3/6/d36659dd87885875.jpg
9/0/a/90a7ab29e71e70d8.jpg
1/5/7/157fda7372b40040.jpg
4/d/2/4d26c637bb4ef18d.jpg
a/8/f/a8f89da0f112fbb3.jpg
9/e/7/9e7ea50aae39b8a4.jpg
a/e/e/aee8184a8ca7cbec.jpg
c/8/e/c8eb103fc82d480c.jpg
3/5/0/35085e4db4be5c94.jpg
4/1/8/418dcc1fc0856459.jpg
2/c/f/2cf1548c510879b9.jpg
d/6/4/d6413dbab7f093bc.jpg
5/9/c/59cb5c3fac682709.jpg
4/0/6/4061dcf4c68fe2e3.jpg
c/5/8/c58740cb16c70c77.jpg
b/7/6/b76f33f3b6722e2c.jpg
9/0/7/907f441a957f0983.jpg
6/d/2/6d2f8872d20128d6.jpg
b/0/8/b083ad82423c012b.jpg
4/2/7/427aa2443bcd6cb9.jpg
c/b/9/cb9a1499aedbd937.jpg
c/4/5/c455f93024ff9c3a.jpg
0/6/0/060ba97e09762b55.jpg
5/f/e/5fef18ee641233b2.jpg
0/e/1/0e117a250cc21294.jpg
f/9/1/f9115893657c9ec8.jpg
d/e/4/de4c9a51031a30ef.jpg
7/f/f/7ff55e7768473617.jpg
0/b/2/0b2010488cbbb9c1.jpg
2/c/9/2c96e80bed8b3005.jpg
f/0/c/f0c8a9afadf83ef2.jpg
d/1/d/d1dafd2872293b74.jpg
d/9/f/d9f498ad05090e6c.jpg
4/5/7/4575da40ce765240.jpg
8/d/3/8d320b344c6e131c.jpg
4/b/4/4b4119c675d75766.jpg
4/3/2/432b10f1e5919e0f.jpg
9/b/2/9b210564e1f6c5b7.jpg
8/7/9/879ecaa6510bdd86.jpg
d/1/7/d17ad8e6a7e63304.jpg
9/e/d/9ed3a19a13b76225.jpg
f/8/2/f827c362304491cd.jpg
d/a/7/da7ab1cb80c945d8.jpg
8/9/6/896d70ccd3e17caa.jpg
f/3/5/f35532cc32453627.jpg
8/2/e/82e0b1a6a9123e5c.jpg
8/b/d/8bdc78aec9bc82ef.jpg
8/d/c/8dc12b71c0fc4ba5.jpg
a/6/e/a6e949fb24f42b4d.jpg
f/9/3/f936d71b0b164ba1.jpg
2/4/c/24c668600af9f543.jpg
d/1/b/d1bd424cf4f1c76f.jpg
e/9/1/e916735f3122e623.jpg
0/1/4/0141b16bde1f7125.jpg
3/5/2/352c960a3df5e2ed.jpg
c/7/5/c7512ee11faea6eb.jpg
7/4/1/741f7249f55919ea.jpg
7/c/f/7cf553b75a69a4c9.jpg
4/c/6/4c6e4f17221238be.jpg
1/7/1/171cb6f112e172cc.jpg
6/6/e/66eb733b69f01eb7.jpg
e/9/6/e9653218ffec26f7.jpg
a/9/0/a90a7bbe2450d3ef.jpg
9/2/c/92c9ec0413a1ab89.jpg
b/7/e/b7e663b714585875.jpg
4/6/4/46459c803926198e.jpg
b/6/5/b655073364a5748b.jpg
2/f/f/2ffc22d89cd4b27b.jpg
2/f/e/2fe6e73c29a898c5.jpg
7/c/7/7c7275880fce170a.jpg
6/3/7/63709c7dc90f19c9.jpg
3/d/9/3d9ee02ae857504e.jpg
2/b/5/2b560ba3e1bb1778.jpg
4/5/9/4593a7990e892580.jpg
1/4/d/14d172ce91cdec40.jpg
6/2/b/62b2a12c9191b4d8.jpg
b/a/4/ba4822e070a302cb.jpg
b/d/e/bde9dc65a748ee53.jpg
f/2/4/f247b477c7fed3ce.jpg
3/a/1/3a116a43462de602.jpg
7/e/b/7ebbecafa43601af.jpg
e/1/8/e181519c4c5beb89.jpg
5/4/7/547e68e92633b6cd.jpg
1/d/0/1d044ffd1bcfb62a.jpg
f/7/c/f7c3b8fc0fd06f9d.jpg
e/4/3/e43b5c597906c902.jpg
4/0/7/407c97c59b49f645.jpg
7/6/b/76b4fa529b6d8720.jpg
6/0/8/608ceb073c69c831.jpg
e/f/9/ef95bb05441b2956.jpg
c/6/6/c668b4c6294885a1.jpg
b/e/5/be54a7ec476b6285.jpg
9/d/7/9d7137434c39f4a8.jpg
d/1/f/d1f53501ff6f94f5.jpg
0/c/8/0c8be54f03c5b8ca.jpg
5/d/b/5db7ec72d78cdf81.jpg
2/6/e/26ea6c54fad1f5a8.jpg
c/d/0/cd074fbea3ce986b.jpg
1/f/f/1ff3efb585ac3186.jpg
0/6/2/06237e6739541a35.jpg
5/0/f/50ff152799a212a6.jpg
4/3/b/43b5cb446c854206.jpg
c/f/0/cf00809e8a4f5a52.jpg
e/7/b/e7b65f09bc14c817.jpg
9/0/0/90096908f6e4cdf1.jpg
5/3/5/5357b84a1dc1b976.jpg
b/8/b/b8b23fe860e4c39a.jpg
9/0/a/90af90928506ed03.jpg
f/9/7/f971d018e1c542b1.jpg
1/9/7/1978b37c6b3a9ee7.jpg
9/e/3/9e3119ca5601fdcf.jpg
3/2/d/32deb366dcd467b5.jpg
c/c/c/ccc5ab85cc300758.jpg
3/f/8/3f8607d3234de171.jpg
c/5/7/c577dba52377bef8.jpg
0/2/f/02fa22a3c3f51e84.jpg
4/2/e/42e0fc86ef82a19f.jpg
4/7/a/47ad93acb5ecad04.jpg
d/b/3/db32e513b03f9019.jpg
6/1/1/61186b9ef58fd5bd.jpg
a/a/3/aa3699d354e89381.jpg
a/c/2/ac27561ae76ff179.jpg
1/8/0/180a13ada72ddd7f.jpg
7/6/c/76c9c7e54a2e83f8.jpg
8/6/c/86ce6d243d315069.jpg
9/9/9/9999012ba2ff8b82.jpg
9/a/6/9a65c284b3055b4e.jpg
9/4/9/949124b9c5a24b17.jpg
2/7/9/2793cef250e19e40.jpg
7/6/0/7608b2255b891320.jpg
c/8/5/c85cd66d6f825659.jpg
b/c/2/bc27ff33558efdec.jpg
3/6/9/3694e26b29ea778f.jpg
7/1/8/7188edad5aa0e970.jpg
2/e/6/2e6ab798342f5949.jpg
3/0/6/3061383fd84eec57.jpg
9/5/a/95a461fd4137b31f.jpg
e/9/0/e90d1aa2b5626dd1.jpg
e/2/7/e2782750fe33cf62.jpg
4/e/2/4e2b02f8bcb2285a.jpg
1/6/a/16add6ad485fcbf5.jpg
6/5/6/6566263edb52d27c.jpg
6/1/b/61b903fd7a15dfec.jpg
9/1/c/91c13775f4e04fc9.jpg
d/9/d/d9d562ff4e880055.jpg
3/b/f/3bf59c10f7cb0a1a.jpg
3/f/9/3f95297dead873f0.jpg
1/c/e/1cebf44b6ab78ead.jpg
3/b/2/3b260fb93f07fbfc.jpg
e/a/b/eabd444184dcb4f4.jpg
6/3/8/6386a1489bf4be44.jpg
e/1/9/e193528fb586f4ab.jpg
8/7/2/872e209f4145827a.jpg
a/4/9/a498addc37177028.jpg
e/d/9/ed9fa7d9fd3e41b4.jpg
8/0/8/808379b3cdf0026f.jpg
2/c/5/2c58a0c8298c6794.jpg
c/1/2/c1233e3dae456605.jpg
c/5/b/c5bcead812fac81a.jpg
4/6/3/46377bb3df984225.jpg
a/b/3/ab33bfaa81d4753d.jpg
f/d/8/fd8d7683dd7adb45.jpg
f/6/9/f692898dc58c736d.jpg
9/f/6/9f60519599ee6220.jpg
b/b/c/bbc350adcbf96760.jpg
4/0/0/40020049e16d0041.jpg
c/c/9/cc96d710680db332.jpg
d/c/7/dc72718bd64b1206.jpg
3/c/d/3cde21a758255bce.jpg
0/9/d/09de297e737f2a54.jpg
e/b/e/ebe9166043465139.jpg
5/3/3/53330b195db3b0d2.jpg
5/6/8/5680d8dc89e17e30.jpg
a/8/3/a8362cad67a22b89.jpg
1/f/0/1f07ef9712fa6915.jpg
7/a/2/7a228f8254ee0a52.jpg
5/3/b/53bfa739bbac70d2.jpg
4/c/6/4c6ef201e07f8bb0.jpg
6/4/5/64509af9a68a1702.jpg
7/a/8/7a8a2eb961d767b8.jpg
3/e/1/3e1d0918cd82d245.jpg
4/8/a/48afdc7626dada07.jpg
c/6/e/c6ec9ca45430f2f9.jpg
3/b/7/3b71928172ccc1ad.jpg
f/6/c/f6c12bc19705f0a1.jpg
0/b/1/0b1c0de0e7f5ff7a.jpg
8/0/3/803615093ed30c37.jpg
9/9/7/997fd1977cab9345.jpg
b/a/f/baf23eec72aed2d6.jpg
5/9/1/591cf238b24f8172.jpg
1/5/6/156e691989b9b75c.jpg
8/4/a/84a878140b095de1.jpg
d/b/4/db4fcb0abab1ee2e.jpg
8/e/3/8e36baf3159899b8.jpg
7/9/2/792bfb941e733fe5.jpg
9/5/7/9577307e1f438958.jpg
c/a/8/ca8213bc3d046f98.jpg
d/d/2/dd2578a645438c76.jpg
d/7/0/d70f99a3df9b9f72.jpg
5/8/e/58e9faee9ff8c600.jpg
9/a/2/9a2cfeefb551773a.jpg
6/5/a/65af46f524ce91cd.jpg
f/8/1/f814d6eaa4c5f6e7.jpg
d/c/6/dc61db0ca3c13ad8.jpg
f/4/7/f475f7b67da23468.jpg
e/d/5/ed5f36dc98cddade.jpg
7/2/4/724d6623435fa539.jpg
d/b/5/db5d7e9262019de3.jpg
e/9/5/e95f7ab10dae5992.jpg
b/2/6/b260b14627429405.jpg
1/e/f/1efe0e667c44380d.jpg
1/c/c/1cc0b5141dba1d33.jpg
d/a/a/daa37df377fdef18.jpg
e/8/f/e8f378c6392abf66.jpg
b/9/7/b972c7f43bbc816d.jpg
d/1/8/d186b8ede4b10d57.jpg
d/f/8/df86c0dde3845d20.jpg
6/5/8/658a80b3657c2fe7.jpg
e/1/b/e1bcd32f677d2f05.jpg
9/4/4/944422f9999c743f.jpg
d/1/3/d1313dc378e03e9c.jpg
f/5/3/f5337be4a532f2da.jpg
e/a/3/ea3004ae35475766.jpg
5/3/2/53239efc52a4d4f6.jpg
6/b/d/6bd3b13579714e4b.jpg
4/a/9/4a95d3f5176c9faf.jpg
9/8/3/983d3d3e30b765cb.jpg
8/d/f/8dfa6a04abab7f27.jpg
0/a/6/0a6b12af4faa6a65.jpg
8/5/b/85bdfcf185d3f0de.jpg
e/f/2/ef2bc2333d7df3c0.jpg
e/c/c/ecc3b4e409329490.jpg
9/6/e/96e8ca95409528c2.jpg
4/e/3/4e388be5b176e2bf.jpg
1/8/7/1871efffb97202b1.jpg
c/7/b/c7b349057533a06a.jpg
4/7/d/47d8b74c07983251.jpg
2/a/0/2a0c964912b03b8e.jpg
e/b/f/ebfc6b9ba72f1efc.jpg
3/7/1/3712739846da9f22.jpg
8/5/2/85254598101671e4.jpg
e/c/4/ec482ad754b73321.jpg
1/7/3/1737cc4049cca123.jpg
1/5/2/152f35e451ab705a.jpg
6/6/3/6631b828332953b8.jpg
1/1/4/114367f5824ef396.jpg
b/4/c/b4ca157fb7a4e2a3.jpg
b/c/3/bc37d3e923250fbc.jpg
e/9/8/e98d0a403b433f5f.jpg
2/0/4/204bc9897adbfa64.jpg
3/3/9/339fd0d3693b87c1.jpg
7/8/d/78d0bcb22c55f90f.jpg
4/e/a/4eac2ff9645fae81.jpg
5/2/b/52b6790976f1a3ab.jpg
0/f/f/0ff4c3146f3598bd.jpg
4/c/9/4c9eef06c63677b5.jpg
3/a/7/3a745e629ff97c45.jpg
0/8/f/08f5d15edec883dc.jpg
2/f/4/2f421b3212d8990f.jpg
d/8/6/d86204c716724b2f.jpg
4/5/b/45bced020b76adea.jpg
3/2/6/3265ebecdea6e2ad.jpg
0/6/f/06ff41f8cc31ac90.jpg
f/8/5/f859353861f810ff.jpg
d/1/7/d178ff74f14eb3bc.jpg
2/7/2/272c42ce90bf0ead.jpg
b/5/7/b57322716fce82ea.jpg
1/f/f/1ffe8acea3ac1f5c.jpg
a/b/e/abe2e38093c66d9d.jpg
a/5/7/a5767e025d489f92.jpg
a/5/0/a50ee009fcf0b9c5.jpg
c/3/a/c3a19a1812eede6f.jpg
5/e/c/5ec393da16b322e8.jpg
0/b/2/0b241418f0e3781d.jpg
c/a/3/ca39124a002a276f.jpg
c/c/2/cc2fbc44e06a99e7.jpg
9/3/8/938fe776f90c50fb.jpg
9/2/7/927163f2c4d4d236.jpg
b/b/d/bbd64c4ec1986c79.jpg
c/d/f/cdfc1f32db6e324c.jpg
2/a/e/2ae69e916b82f23a.jpg
3/e/f/3ef2ff95c382d0c6.jpg
b/8/0/b8042b9bf4fc9ca7.jpg
d/5/c/d5c5771c89e4747a.jpg
a/8/1/a81214dda64a546d.jpg
c/c/6/cc6bb29a2199b744.jpg
b/b/7/bb7c73973bdea3dc.jpg
d/a/0/da0e7b3a0640385c.jpg
4/7/3/4733f48cafb9bc87.jpg
f/7/d/f7dd76b2b4f8b2ca.jpg
8/6/0/860ce6a41ef7c22f.jpg
a/3/9/a39b915d9c32933c.jpg
3/6/0/360a06447e6d881e.jpg
4/2/1/42143ffe7a43962e.jpg
b/7/f/b7f9317524a17be7.jpg
6/6/d/66dca90df1c18769.jpg
6/7/2/67278e5024569e2d.jpg
f/5/e/f5ef1955ff36faa4.jpg
e/d/6/ed6c573113e2468c.jpg
3/2/f/32f73137938608b3.jpg
8/d/5/8d56cf85fa827947.jpg
a/2/1/a216513843055c97.jpg
5/0/9/5092d15784524890.jpg
a/6/7/a67926b39e5e4b82.jpg
d/7/b/d7b5c4e95f04be7c.jpg
5/d/5/5d50b1fe8ba496f2.jpg
7/e/a/7ea2b0ccb4942f50.jpg
0/5/9/0593ec8a9e9dd07a.jpg
4/9/8/4983c5286716e75f.jpg
7/1/7/7179636beff397e3.jpg
7/2/1/72114f4cf040babf.jpg
5/4/d/54d47f6c5148aa1e.jpg
5/f/c/5fc7ada08b401be9.jpg
f/8/c/f8c4f6c761ae50ec.jpg
5/f/d/5fdfed3ef5d5eb77.jpg
b/3/b/b3b796053c7d0026.jpg
9/3/8/938df76eeb73c596.jpg
9/f/0/9f07efd26fbd86d6.jpg
7/9/0/79065364ba85fe73.jpg
8/3/d/83d4020dbb045c81.jpg
1/8/b/18b2eb8fbf8bb226.jpg
d/2/6/d26174016127e0a1.jpg
2/7/1/27154d46f43ee614.jpg
b/b/9/bb9510b68eb80807.jpg
1/4/9/14948d9c0c448d02.jpg
5/1/4/5144d565fc2fc01d.jpg
2/5/c/25c63d866844a03a.jpg
f/9/0/f90555ab9161846a.jpg
1/2/2/122c941eaec57ebf.jpg
0/5/9/0599b1c5a03eb108.jpg
c/2/2/c22e3304b7918d67.jpg
3/f/5/3f5af2feb7af95e7.jpg
5/f/2/5f2bd42540af36fd.jpg
9/a/a/9aaba0a7f5f6307b.jpg
8/b/3/8b301a930f34d801.jpg
c/e/6/ce604289ce53662b.jpg
9/c/d/9cd045be334331cd.jpg
4/5/1/4519b34a1cd63d69.jpg
6/b/0/6b0ff01748a0c8d0.jpg
d/a/3/da3faef5161fbbea.jpg
1/a/0/1a012832e498ea54.jpg
6/6/8/6688743161e258fd.jpg
7/7/d/77d2ea9190b78660.jpg
c/c/4/cc412ee90b04bca5.jpg
6/7/5/675f924d1e38be4e.jpg
4/a/7/4a791bcf9a89a605.jpg
b/3/a/b3a6e8fbea58ad75.jpg
c/6/f/c6f117ebcb8faa53.jpg
6/c/b/6cb897dc839da616.jpg
1/9/b/19bc60c38d335141.jpg
b/2/7/b27123bd0ad481d7.jpg
8/8/a/88ab5c583c9a483b.jpg
5/d/5/5d5f6450562262dc.jpg
1/f/8/1f83f4e5e87ec1f7.jpg
e/f/a/efaff94d39965444.jpg
9/0/7/90764315a862ea1c.jpg
f/9/b/f9bea834df45e45a.jpg
3/8/f/38f0123369566da2.jpg
9/c/c/9cc0f0373b7cf3c9.jpg
7/3/f/73f90f2bfbe662f2.jpg
7/1/4/7149c441cee93e7b.jpg
6/5/0/65066f5c8c97f254.jpg
2/5/0/250246fe9b037c67.jpg
b/8/0/b80a254a336606db.jpg
9/1/c/91c418143c3a5a4b.jpg
7/b/4/7b4ffe93856a9a02.jpg
b/2/3/b23f86828388742a.jpg
9/2/9/929cafc02ef8da18.jpg
e/c/f/ecf4db80b7836ba2.jpg
d/8/1/d817f071af28f7b4.jpg
e/b/c/ebca04f74ff444ba.jpg
9/0/2/90291bb58f8b4ce7.jpg
8/e/e/8ee0b51b0ae6c504.jpg
a/1/a/a1a3e2c3c6f0e922.jpg
2/a/a/2aa40d322d408c55.jpg
7/8/e/78e2662a30a9d805.jpg
4/2/f/42f93c1a20ec408b.jpg
d/d/5/dd5b7c109d73f64f.jpg
e/e/2/ee288898c6cefbfe.jpg
7/6/6/766aa5d3a782e78e.jpg
9/3/6/936437d51a28f917.jpg
b/f/5/bf5f64d82ec78d62.jpg
7/d/6/7d63a0b47e2cd7be.jpg
0/8/5/085336cf2ca75cd0.jpg
1/e/b/1eb95f64b55685ed.jpg
4/5/3/45380ad5932b8336.jpg
e/a/a/eaa8fb9e09dd7adf.jpg
7/5/e/75e88c0331a2af9f.jpg
0/b/f/0bf0d492678c84b8.jpg
6/d/c/6dc683ee58087952.jpg
3/f/1/3f1f3cc62b26ae39.jpg
9/8/b/98b4f38bf7ab70ad.jpg
b/6/0/b607f8226c10a987.jpg
9/e/0/9e0aedfe9b232f67.jpg
6/a/8/6a8b33c666441985.jpg
e/6/9/e69a2ce90386ee54.jpg
0/5/7/057d15776eedd6f1.jpg
c/6/1/c611678db656cc4a.jpg
e/1/f/e1fd27ea8898d43e.jpg
3/2/2/322279da64fd6a8b.jpg
1/e/0/1e0610c2f9a4bc08.jpg
1/2/2/12258244fad81b29.jpg
9/b/3/9b33e0195e94ef23.jpg
2/9/c/29cc830ff46c66e2.jpg
4/1/5/415eb6eeeda656fe.jpg
2/c/5/2c52a44c51ac13c8.jpg
0/f/7/0f709607b2dd23f8.jpg
b/3/4/b34cefa906218c5b.jpg
d/3/d/d3d9612d81a59767.jpg
e/a/3/ea33eb4f14fafe40.jpg
2/7/1/2715e9d73c1f7706.jpg
2/6/c/26c0795216d3f2b9.jpg
e/c/9/ec9fcf48512538fc.jpg
f/e/4/fe44719ba5617e3a.jpg
7/a/6/7a6998266f8175d8.jpg
9/f/0/9f011a830f3ccb79.jpg
6/a/a/6aa459b30e249f94.jpg
1/e/0/1e0892a63bcaba74.jpg
7/6/d/76d41e7523ab6f95.jpg
b/1/c/b1ce3e7c4a668aa8.jpg
d/2/7/d27d41afe0428660.jpg
6/f/a/6fadc3127361a0fe.jpg
5/1/3/5134b1952e83cdc3.jpg
f/2/6/f26b3c5c01256afc.jpg
3/a/7/3a707aaa74655d00.jpg
2/2/8/2284cfdb878f464c.jpg
d/b/e/dbe2db2272f5a867.jpg
6/f/f/6ff5435cb84e13ec.jpg
0/b/7/0b721cc6a4d567b1.jpg
b/3/f/b3f45dd7d8976d02.jpg
3/e/f/3effe987a0e6ab09.jpg
c/0/5/c05743f6706b3e8d.jpg
6/8/2/682571f00f3cbb4a.jpg
b/0/d/b0dafdd2bd79f80e.jpg
7/6/9/7691c47ca87a5a42.jpg
4/4/f/44f97d38ee8aee84.jpg
b/8/c/b8cc7752ef19e5ba.jpg
6/c/6/6c6b8ab9ddafd943.jpg
6/5/c/65c3edf1b20c8abe.jpg
e/b/7/eb759d7c0412b6de.jpg
c/0/9/c09de195eaeba5d7.jpg
2/a/d/2ad10cf4af85351d.jpg
5/e/3/5e39cd71298c8605.jpg
0/a/e/0aec0d7de2d76111.jpg
0/6/4/0643f8b296b49322.jpg
e/c/f/ecf29803f17c2559.jpg
5/6/d/56df4a59f19ae767.jpg
e/f/8/ef8054d7cca46257.jpg
b/0/1/b011a5f0c80c9c9b.jpg
3/e/7/3e7769a36ebac6bf.jpg
2/1/a/21a7fb301088ccc4.jpg
e/0/5/e0531357067bf06e.jpg
0/2/2/022878078a87861f.jpg
0/7/f/07f543abc017e006.jpg
5/c/7/5c79488b91daf1eb.jpg
5/a/e/5ae1718c86f52010.jpg
8/9/3/89339db3defaf52e.jpg
5/1/1/511ebca1e9063d81.jpg
5/1/4/514df534487e9865.jpg
b/5/4/b54c8dbf9584d8b2.jpg
e/8/f/e8fb66b036598450.jpg
5/3/8/5385e8c1291073e2.jpg
7/9/3/793b60622f3749c9.jpg
0/1/5/01594bec9e54e984.jpg
2/8/a/28ab5536d265c23c.jpg
e/3/3/e33b75cd1db1f98a.jpg
e/2/3/e2379176a3addbec.jpg
f/7/7/f778794c35e3bf6c.jpg
3/8/7/3875eb069b7e99e2.jpg
4/8/1/48102d878067788f.jpg
a/7/4/a747ef4c903fb734.jpg
1/0/1/10110cc48fa87f19.jpg
2/0/d/20d086aff3ea4a5b.jpg
a/0/c/a0c96acb7ffa057a.jpg
b/7/d/b7de2151418b4a2e.jpg
2/9/2/2927d533f5ec516a.jpg
0/0/4/004727e5ff1dee1b.jpg
c/b/6/cb66b02657c5bc94.jpg
c/e/9/ce9833c1d016a22c.jpg
1/0/2/102f830202474b8d.jpg
8/1/a/81aae464b22ad0ae.jpg
9/7/d/97d973711776a038.jpg
5/8/8/58851be983142aab.jpg
f/a/d/fad86e315e90d73c.jpg
8/b/9/8b9f0cb8109f5d54.jpg
2/b/c/2bc6670e8e82cf5f.jpg
b/0/e/b0ea451d34689fc6.jpg
f/9/f/f9f28ac598fa3e81.jpg
a/1/d/a1d3e0f9b18804b7.jpg
b/f/6/bf644c5538bf2cb2.jpg
4/d/4/4d4e3e8aeef5537f.jpg
5/6/2/56246c24a33a8a09.jpg
0/2/3/023b65e0e6d94527.jpg
e/0/5/e051533918ed6be0.jpg
b/c/f/bcf734666590d612.jpg
a/5/6/a561b13aea2b2843.jpg
a/2/5/a25bf41f3999d490.jpg
1/2/a/12a59aa598bc0cfd.jpg
b/b/f/bbf35897d5c546fa.jpg
5/7/a/57aef269f776cee2.jpg
2/8/8/2880735af2eeed7f.jpg
7/8/1/781c62c7381b035e.jpg
0/0/a/00a6ccc711ae35f5.jpg
f/7/b/f7bffdae6118b25f.jpg
3/b/7/3b755c3f2ed23047.jpg
f/0/f/f0f3f712f48fae8d.jpg
6/d/1/6d1ec3b0b51d0966.jpg
8/2/2/822ddb8d80021dbd.jpg
5/6/4/564b71bf2993e569.jpg
7/3/6/736f0afabf51334c.jpg
4/6/5/465d395a79dafb76.jpg
e/f/1/ef15f03e6652c610.jpg
4/a/5/4a5235e88b6752d2.jpg
f/9/c/f9c170a9d2a806f9.jpg
5/e/1/5e172634e03c4893.jpg
a/0/b/a0baf7e1cae45e69.jpg
f/0/f/f0ff1f6ec8337194.jpg
4/a/d/4ad46f0a1bca3cb5.jpg
b/8/4/b847b41bfb42e3b5.jpg
f/2/9/f2995093df353902.jpg
b/e/f/befbfa8567a96956.jpg
3/1/3/313f9fcf67f6215e.jpg
1/4/c/14c3e1cebcc15864.jpg
a/6/8/a6832822bf1b6d15.jpg
f/0/e/f0e8c87e95e9772d.jpg
8/f/f/8ff1da99fedade98.jpg
0/e/3/0e3d188b6bfada20.jpg
a/0/f/a0fa7ab10a456b52.jpg
6/f/8/6f8d4ec80cf2eb8d.jpg
5/2/d/52d20591f4d728dd.jpg
b/e/e/bee68e9c20c67f44.jpg
4/4/5/445291ad22b53a59.jpg
e/9/b/e9b6f6b2b79b6ee1.jpg
7/0/1/701c8d561e291d00.jpg
b/2/5/b255622511972567.jpg
7/3/b/73b1181b0152fa8d.jpg
7/f/2/7f2aeb93ef4b28f0.jpg
e/e/0/ee0ddefa95c6751e.jpg
f/1/3/f1359ae472db23b5.jpg
4/6/e/46e255e9e0526f62.jpg
d/0/a/d0a43863f49655a8.jpg
9/c/d/9cddc98910177211.jpg
3/3/0/330c744b45d5533b.jpg
e/8/4/e843484edc01837d.jpg
0/b/d/0bd8b3303fb60ab5.jpg
4/e/6/4e6902ec17ea3fb8.jpg
1/2/9/1292b0fc5af696f6.jpg
3/b/8/3b83e998ce7e43c6.jpg
8/1/d/81d7c06097d29a74.jpg
a/8/f/a8f7e089fe680cef.jpg
e/7/3/e7399eed3d560304.jpg
e/b/1/eb18165e16482a12.jpg
0/8/1/081cb6e4c506393e.jpg
8/7/b/87bd4086a35f0f31.jpg
b/0/8/b0811a8f08920600.jpg
6/1/a/61a4435e0efb2f5f.jpg
5/e/7/5e7660806fb008eb.jpg
3/1/d/31d2f82e0c047b1a.jpg
6/9/b/69b9ef936ac6ecda.jpg
1/5/1/151e00bc4ff96dc6.jpg
b/7/9/b79a41f01a1c4539.jpg
8/c/b/8cbf0d98cd5a0d8a.jpg
2/c/3/2c3073933391e476.jpg
4/7/2/4726a33fb0478d68.jpg
c/b/9/cb9f2128380281b2.jpg
b/8/3/b8389c588e40035a.jpg
7/f/7/7f79c0197f5b837f.jpg
8/7/7/877052078eb08013.jpg
9/3/0/930122e4eb4e5c50.jpg
4/4/4/44483b7ead7201df.jpg
4/6/3/46387f015fe2c685.jpg
f/d/f/fdf3d11a83f0bc1b.jpg
2/9/3/29397f2943cd10e8.jpg
2/a/e/2ae04baea6d9420a.jpg
6/a/6/6a6f40af3be2dacd.jpg
5/8/1/581e01d5fce38545.jpg
5/a/f/5afa911ab902b957.jpg
3/b/f/3bf34e8e62d9d50c.jpg
7/0/c/70c9a9747a7ca7a1.jpg
e/0/3/e030255ce081c905.jpg
e/a/a/eaacc4d33e6e2a8a.jpg
7/c/0/7c04239e1a0923e1.jpg
0/2/4/0245908afcf8de66.jpg
5/1/5/5157aa66bdc55b68.jpg
8/4/e/84ed53afb04ba045.jpg
5/4/6/546986028e927df1.jpg
0/8/b/08bf522cf388e2cd.jpg
f/8/5/f85d64ffc3fdc0cd.jpg
f/2/f/f2f6c7c6a6a3bec7.jpg
9/a/8/9a80aed8d3283314.jpg
a/5/3/a5364f46f5389dcf.jpg
7/a/f/7af8a5a042495263.jpg
7/6/4/7643a5d9f93add12.jpg
4/5/b/45baee2b0efb54e3.jpg
6/7/c/67c211715d9d698f.jpg
1/6/b/16b35d9567fd9889.jpg
8/2/3/8236662bbec7e348.jpg
7/9/d/79df98d1c73fd99d.jpg
0/b/3/0b310457d2c04ca9.jpg
7/1/7/717cf7dfae4fcf70.jpg
6/f/c/6fc7b7ed6adf5eb1.jpg
6/a/7/6a75e25108c5fdc8.jpg
5/1/8/518401197cce8bba.jpg
4/d/4/4d476e79e8ba6243.jpg
c/2/4/c2490f81b0c25409.jpg
7/4/8/748de5a2a85ef354.jpg
6/e/e/6ee43740a4cc3c85.jpg
8/6/b/86bdeda62f94fb3a.jpg
5/8/e/58e407ebcdb00c70.jpg
0/6/e/06e0f795fa24540a.jpg
2/3/d/23d686b9045dd280.jpg
5/4/8/548b2a8400176e09.jpg
8/2/1/821372c62c5bc202.jpg
f/6/4/f64bdce1faf3c73b.jpg
6/6/a/66aec29d9c5403d8.jpg
3/3/1/33185cb4f9334448.jpg
4/b/3/4b3484cc292f20b7.jpg
d/d/0/dd04ab3e25520c44.jpg
0/a/d/0ad8a03764d87f81.jpg
c/6/c/c6c1154714e2d08a.jpg
a/7/c/a7cd938cc946a6c3.jpg
8/6/8/868093783b5c141c.jpg
5/6/8/568b0468cbf7ab2e.jpg
c/e/6/ce609b6340e59f57.jpg
5/c/d/5cd47730d215bd1c.jpg
a/1/4/a148f4cb7c2804a8.jpg
d/5/5/d55df0478789cfe9.jpg
f/6/c/f6ca5a54f7e341ac.jpg
a/e/0/ae0d85f02930d403.jpg
c/a/f/caf82d5e90a7b3a3.jpg
7/2/c/72c376848686929e.jpg
3/0/8/3083b6763d9af5a4.jpg
f/f/3/ff3018b348de7ca0.jpg
e/5/2/e52dded5a95acce1.jpg
3/5/7/3575593e874e79e0.jpg
2/4/d/24d16aff66edd9d8.jpg
6/c/5/6c5eac4cd5bd05b4.jpg
7/0/4/70496c57ad8bb6e5.jpg
e/3/7/e3768d73398150b9.jpg
d/4/f/d4f418b7aaa3a6ac.jpg
8/b/1/8b1e46318cf1a20a.jpg
9/6/e/96e515f90447a216.jpg
a/0/4/a047d235a4fd8235.jpg
4/7/8/478be2f7c388b487.jpg
5/5/8/5587004262b7db6a.jpg
c/8/e/c8ec0595f97ddf1a.jpg
a/2/9/a29825323b16b545.jpg
9/d/a/9da5056c66e8c991.jpg
9/d/a/9da012cc76798b01.jpg
c/d/e/cdebf430365f70ef.jpg
a/0/0/a00654016a2125b3.jpg
b/b/6/bb6b944c23f09bd7.jpg
2/b/3/2b3fcd027e49f4b1.jpg
e/9/a/e9a6b176577a55d6.jpg
9/9/5/9954d6f1eff447f8.jpg
2/c/4/2c444a2d61437735.jpg
b/b/1/bb1bebf91129e6d5.jpg
4/e/0/4e031d89d8980446.jpg
e/a/8/ea824f338fe5e84f.jpg
c/5/b/c5bbb98a6259f443.jpg
b/2/7/b27c1c82e38ed28e.jpg
d/5/1/d51f6fb1ab941b02.jpg
8/7/d/87da8828ccf75d63.jpg
c/5/2/c52c92e55fe31f5e.jpg
e/5/b/e5bcf31d95f288d6.jpg
3/7/3/3734edfeabe8d550.jpg
f/9/f/f9fc9e06a0d532a8.jpg
3/c/6/3c6167f8169e10b2.jpg
6/8/c/68c7582fc77f0e2c.jpg
0/e/b/0eb9bedd9245be77.jpg
8/8/9/889579c487959a9d.jpg
2/7/b/27bf66f354812023.jpg
2/d/a/2da3b2ee1989d58d.jpg
2/2/7/227e534ae7dd5a3a.jpg
1/c/c/1cc64bdfeef21baa.jpg
d/5/2/d526ce527a49fb3e.jpg
5/2/3/523a77c112b3860a.jpg
d/8/6/d869c21f91033b78.jpg
7/f/e/7fe8fba689fbbda5.jpg
c/7/7/c77dec4ca61032b0.jpg
1/9/a/19a9a1314d07f30c.jpg
3/d/6/3d643699af3c0502.jpg
7/2/7/7276d1ec829315b3.jpg
a/2/2/a22eea4c3517b867.jpg
4/9/a/49adf101c95ef1be.jpg
9/d/f/9df2f773030a6742.jpg
7/1/c/71c6209eb9f1cc2c.jpg
1/5/4/1548c7d3f0b3fc85.jpg
8/8/8/888c05d72c3583c7.jpg
1/2/9/12995a748f197bb4.jpg
e/b/b/ebbc602377432d92.jpg
d/3/8/d381bd3aead73cfa.jpg
e/0/b/e0bc4f729aa16ee6.jpg
6/3/3/63349f43dc4eabf4.jpg
d/d/e/dde5225272db05e5.jpg
e/b/8/eb8433a804be2f80.jpg
d/6/5/d653e7963a2cdd12.jpg
3/a/a/3aaa5801a8302fff.jpg
e/1/2/e12d9539f15b6b13.jpg
8/a/5/8a554d52b01ab414.jpg
7/2/1/7212d0deda713f71.jpg
1/7/e/17ed3e282479a01d.jpg
d/c/b/dcb646df7e4dccba.jpg
d/6/5/d65b69446b3bdbd0.jpg
c/a/0/ca0c2e6ffeedd419.jpg
c/0/5/c055920535f49ead.jpg
4/5/c/45cb2dab46334f4a.jpg
5/f/1/5f1ea23c924b1c6c.jpg
7/6/2/7628e40957dd1389.jpg
0/2/f/02f239c27e687a64.jpg
b/f/3/bf3144a8245b5ace.jpg
4/6/4/464e181d29c7a1a7.jpg
0/3/6/03686b7a5060f624.jpg
f/1/4/f1488d06102749a4.jpg
e/d/e/ede638a148a04903.jpg
3/3/b/33b0e08dd096daf3.jpg
4/b/5/4b5b016839f1a246.jpg
9/2/e/92e9c11c6ce522b3.jpg
7/e/4/7e41ccbac23cc275.jpg
8/f/4/8f4f1456712a5f96.jpg
5/4/3/543a300ce3516064.jpg
f/7/8/f7812b1857d9ab9f.jpg
d/b/d/dbdb733c39e6d9c1.jpg
6/a/b/6ab8ec5c0e214110.jpg
3/c/8/3c81e32e3d8dcfcb.jpg
9/2/a/92ad4ae09791d6df.jpg
d/7/1/d719178b712ae355.jpg
d/f/c/dfc9eade8f5bffe9.jpg
4/f/f/4ffd25effc52929d.jpg
7/c/e/7ce67404cb305d03.jpg
6/c/3/6c3d25f818c21e3a.jpg
e/5/d/e5d2d3344fdb00bc.jpg
4/1/8/41830c97bb64c8fd.jpg
e/7/d/e7d1f7eebf533d80.jpg
b/2/c/b2cf69ffac3e8864.jpg
d/9/d/d9d37961113d18c9.jpg
2/8/a/28a2577ff62b51c8.jpg
7/8/f/78fe2eb3b74f404f.jpg
f/6/f/f6f4dec9f0fe18fe.jpg
e/a/f/eaf29cacffa15fb2.jpg
9/9/2/9925b4fa9ff31cf4.jpg
1/3/1/1314fc1a0929f2ff.jpg
8/a/b/8ab3581091bee6fa.jpg
b/1/0/b104987febf71a57.jpg
8/d/7/8d770270555100e7.jpg
9/6/a/96a23e04da2158ed.jpg
9/9/d/99d1aa5753373753.jpg
7/6/d/76d609ab075c7ff3.jpg
7/9/a/79aa6799a1d276fe.jpg
f/4/4/f444b30ba10b5fec.jpg
3/c/9/3c9cd9fedb86160c.jpg
b/1/1/b11890bee8994f1a.jpg
4/d/2/4d293e01c46ca1b6.jpg
2/9/0/2901902481e4fe55.jpg
6/5/3/653a64bd01773165.jpg
1/2/7/1273a6f76e80f75f.jpg
1/0/7/107d9a46dc80029d.jpg
7/b/c/7bc0d2ea42bbface.jpg
a/4/b/a4b61bce63eb56e2.jpg
8/6/6/866aade079e86e3c.jpg
9/6/6/96679909182fe458.jpg
c/d/5/cd570d07f558089e.jpg
2/e/1/2e1b3723838939a2.jpg
1/8/5/1855b8d94b645ad5.jpg
d/e/7/de76a517593a930d.jpg
f/b/e/fbedea49bf9e3eb3.jpg
1/f/7/1f77f86b346f9210.jpg
d/8/e/d8e84f681f9d9bc3.jpg
e/5/6/e56f28f145c2530d.jpg
3/4/5/345cce7040307b69.jpg
3/0/1/30103c18c355838a.jpg
a/6/4/a6461c83c6c6f39e.jpg
0/c/4/0c4117ea8375bb08.jpg
9/5/a/95a36be91b16f53d.jpg
4/7/c/47cc9edbb895e320.jpg
8/a/7/8a7ce4fe379a5298.jpg
5/a/a/5aa208e03685a989.jpg
a/f/a/afaedec35235c479.jpg
5/7/5/57538db0e0d4999a.jpg
d/6/1/d6112c5afd134c0b.jpg
c/f/5/cf5b6c5dfea646f2.jpg
1/f/9/1f9cadf8e1d9aeb3.jpg
d/d/6/dd6ffe40ff1bdeb6.jpg
1/4/1/1417b2d492948b0a.jpg
2/8/e/28ed0519168ecfa0.jpg
0/5/b/05baf1a5530adf9d.jpg
c/3/e/c3ed35ef0d335e51.jpg
2/f/2/2f2751a8d662389e.jpg
3/b/8/3b851e071da2f7de.jpg
0/1/2/01216522c7029620.jpg
7/4/e/74e7e292152d2987.jpg
2/7/2/272d07f9f1a9adc4.jpg
6/f/e/6fea83a280eafebf.jpg
f/e/d/fed6980b54df236c.jpg
d/f/9/df94aad1777e77cb.jpg
0/f/6/0f62d01742120596.jpg
2/d/0/2d09bde825d2c1a0.jpg
e/c/f/ecf958798505f613.jpg
c/4/e/c4e5eb2e9ae35ebb.jpg
1/8/e/18ea2dd104e71887.jpg
4/a/9/4a97525af507c338.jpg
9/f/1/9f10d7fb62c52255.jpg
2/7/0/270bea611434f73f.jpg
8/9/1/891075214897dec4.jpg
d/e/0/de0f52147f8078a3.jpg
4/d/8/4d8f2040fb17241f.jpg
9/0/b/90bcf1d529126cdf.jpg
f/3/8/f38037840eecf12c.jpg
6/d/c/6dc3714b23b4cf2d.jpg
f/b/4/fb4b2cc5f0ec6f2c.jpg
0/0/9/00960711984ddc2c.jpg
d/f/a/dfa09895cd655aa7.jpg
1/0/e/10e8895925584b56.jpg
8/3/3/833f277f7b6e5b6a.jpg
3/2/e/32eff8f03cbc708b.jpg
7/6/9/7695b1101a0a8d38.jpg
c/e/b/ceba8359aec3cf2b.jpg
3/9/f/39feb74dce372d85.jpg
8/b/9/8b9a943bf61325cd.jpg
6/d/b/6dbcbba1109191ed.jpg
5/3/f/53fcb25a8be6bf15.jpg
a/0/4/a04505e7147f3a91.jpg
a/4/7/a47dd53e66ae02b9.jpg
3/c/b/3cbbbe61afd8f9eb.jpg
1/3/e/13e3c2ffa8ff3f43.jpg
c/e/8/ce86cc67a6f5b1d0.jpg
0/0/c/00c8899854e537d8.jpg
f/f/8/ff8ed248dda6b7ad.jpg
4/0/9/4094be5d3edc3efe.jpg
3/a/3/3a3466b0d822977f.jpg
1/2/9/12947233d02b8f32.jpg
d/1/0/d10b9f56af420623.jpg
9/9/6/9966acd60bc6b6af.jpg
5/6/a/56ae7413a644fd98.jpg
1/2/4/124d8c14406061a6.jpg
c/4/e/c4e65210043e9059.jpg
f/0/2/f022cdb7e56e5370.jpg
d/c/5/dc5dfc391bc0916e.jpg
4/a/8/4a86ddfa44e1de15.jpg
6/4/2/642001a6ebe92f85.jpg
b/c/e/bcecc4353945511c.jpg
6/3/7/637da8621ba4586f.jpg
f/a/1/fa10875b3c3f991a.jpg
b/c/9/bc9898a21b05164f.jpg
1/e/9/1e944444860ee5f9.jpg
4/f/7/4f745edcdfa63af2.jpg
1/8/b/18b617a6f9fd9e08.jpg
b/6/6/b664376ba3079af3.jpg
a/6/f/a6f3a55b61cc3597.jpg
4/b/1/4b17c8a67387b224.jpg
0/a/7/0a70d1a1ee618760.jpg
5/3/b/53b6a188969a8c29.jpg
8/2/5/825d93abd78fc029.jpg
5/7/7/5773f97cd91bd263.jpg
d/5/3/d53012b69a9eb65d.jpg
6/e/4/6e4cd6d80bab0164.jpg
a/0/8/a088a3df7e00498f.jpg
0/7/4/074f44fd3c65788c.jpg
8/f/8/8f8b10f5333f98fc.jpg
4/9/d/49dc60cb1d4de72f.jpg
f/1/c/f1cd243023e33865.jpg
b/9/8/b981540ef053aed0.jpg
8/8/4/8846fbca22c8f86a.jpg
1/5/6/15610c6e1f9de9b9.jpg
b/9/b/b9bc4f20ab8ac626.jpg
d/4/a/d4ab54916720a258.jpg
b/c/c/bcc02621d96167e2.jpg
f/c/b/fcb000a3e621157a.jpg
e/e/c/eec0808328680b61.jpg
e/6/1/e61ccef745253b98.jpg
3/8/e/38ea04c3bd67dc88.jpg
4/8/9/489540e3c25823ab.jpg
e/5/0/e5092217ff275495.jpg
2/7/1/27163039e96ce2ce.jpg
1/9/b/19bb41297ade3019.jpg
f/f/3/ff3bc0f0466c0557.jpg
5/b/f/5bf3ec50f93dbb67.jpg
9/1/0/910e2e45d5acfb39.jpg
1/1/1/1118bb044d25e9f1.jpg
9/c/9/9c9f761daaa9895e.jpg
1/2/d/12d79e076b1b60a8.jpg
1/e/1/1e145552a8c38122.jpg
2/d/e/2de4282a43e039d1.jpg
5/d/0/5d09e21628cd3742.jpg
f/b/c/fbcdcbff3e5e1381.jpg
1/e/0/1e0dc54bc9ff8b62.jpg
c/4/a/c4adc6ba55cea3c0.jpg
7/3/e/73ec2c149c4c8d55.jpg
8/2/7/827c40945378ee0a.jpg
8/0/3/803f28cd446f6b79.jpg
7/0/4/704db41693f50717.jpg
b/f/e/bfee17afee920af2.jpg
1/0/d/10da13ae60535f01.jpg
7/4/1/7419c2184378add2.jpg
a/3/a/a3a5dc6ce4f50423.jpg
9/7/f/97fa76191c1fea66.jpg
b/1/2/b128507c42d4f888.jpg
8/9/c/89ca2bea34f6aff6.jpg
e/f/e/efedb4e6aea110bd.jpg
3/e/3/3e3b73a580817901.jpg
5/b/7/5b7add4b89ab054b.jpg
e/5/8/e583c29bcd494f63.jpg
7/8/6/78672aa207a63098.jpg
a/1/8/a18049e1b3c882a5.jpg
c/a/d/cadbf585ad03a813.jpg
1/f/3/1f3e90ce95004315.jpg
1/2/1/12136029ce3e8d9d.jpg
2/6/b/26b6afc4a8220268.jpg
5/b/1/5b16f4efa4b85670.jpg
2/4/0/2409b9af43087b06.jpg
f/c/4/fc471b0482ed0604.jpg
b/6/5/b656a1e0bbc1813e.jpg
3/4/7/34751cf9310e838f.jpg
4/0/0/40090a4f04df2154.jpg
c/6/f/c6fc650fb54f6ffc.jpg
d/8/e/d8e701d9c0cf0c24.jpg
c/a/4/ca480a99eda6d839.jpg
9/5/a/95a2909e5d86dfac.jpg
9/9/e/99ef9a647f5deabd.jpg
4/4/0/4407df75ea3d1668.jpg
d/1/5/d15e0d3cccfd0724.jpg
c/f/8/cf880e5209a3f000.jpg
6/e/d/6edea9fd7c26c8c0.jpg
5/5/0/5500baccea40418f.jpg
f/f/a/ffa5c68f751fe576.jpg
9/6/1/9612bec8b0802ec6.jpg
3/3/9/339a8e6b74c531f3.jpg
0/1/c/01cbb143160bbdc6.jpg
8/f/1/8f17e11c544c7061.jpg
1/6/4/164ec61e942056b8.jpg
5/8/8/588598c6c69609a4.jpg
f/b/a/fba6e1add1350363.jpg
6/0/9/609ac18e51167b46.jpg
b/7/7/b77baa169c1fff7d.jpg
7/7/a/77a9a19040c73629.jpg
8/d/8/8d80b616d033aa5e.jpg
4/b/e/4bedfae1de99db01.jpg
7/1/2/712206716d7736c6.jpg
b/7/2/b727df3b2cd73641.jpg
6/8/5/6858add888017c1e.jpg
3/3/8/33856f8cd8ad123c.jpg
b/a/2/ba2589480a72112c.jpg
8/9/f/89f79319f81efa47.jpg
1/5/7/1579fd4d980abe8e.jpg
3/b/e/3be62fbdf553f258.jpg
3/2/1/32148b28b43313f2.jpg
9/b/9/9b9214bc9272f986.jpg
e/3/2/e3205ff12b8fd756.jpg
e/5/d/e5d4c5e68568af5f.jpg
7/3/3/733e36efa1885ed2.jpg
a/8/1/a81a7fbb55606d86.jpg
5/c/4/5c425400b6619cb6.jpg
6/9/0/690538c0b48a545b.jpg
a/8/d/a8d8f9a3afbffd34.jpg
8/b/4/8b4f73267367101b.jpg
2/4/8/2489d359bc911851.jpg
0/a/3/0a35c6c4c6668814.jpg
9/c/3/9c31bed62bf6cab5.jpg
c/3/3/c33166d1cb153e0b.jpg
c/0/5/c05ccb717b3a4826.jpg
c/8/d/c8db8db1aead4e3a.jpg
b/7/e/b7e516c97af96ecf.jpg
3/a/f/3aff641596e9b09d.jpg
5/f/e/5fec8ef3d021c0a9.jpg
9/c/0/9c074027e782e6b5.jpg
1/0/5/1059ade5e54c9426.jpg
9/3/3/933f22747b70712d.jpg
d/7/3/d739eeb2b253779f.jpg
c/c/f/ccfcd338169a4ea7.jpg
6/8/9/68901880fd752b20.jpg
5/5/c/55c25223de4ee245.jpg
a/f/2/af27676993adfcda.jpg
5/2/9/529f39670d71516e.jpg
3/0/4/3045b59ed9004df5.jpg
a/a/7/aa7133c67591eca7.jpg
1/2/4/124f7e1f4112a168.jpg
c/9/b/c9baeb3fd3684c5b.jpg
3/7/1/3710951e7644ae3e.jpg
2/9/7/29737173cb85f044.jpg
6/b/b/6bbfedac574c1c18.jpg
e/1/c/e1cefd30623d973e.jpg
9/7/5/9753e28b9eb59992.jpg
d/f/b/dfb6140a3626442f.jpg
e/2/2/e2223dd7ea82939a.jpg
c/1/2/c122946c6bbed49f.jpg
7/a/0/7a09681b2b811bb0.jpg
7/2/9/729b45ecb6b70c3b.jpg
a/b/e/abe4734ef40b6ae8.jpg
a/3/d/a3db2f9b218d7bc9.jpg
7/2/7/7278cad0d310f04b.jpg
8/f/7/8f793fc709114a46.jpg
e/5/7/e57d817dec7b97cc.jpg
d/9/1/d91be7e355e0e2b9.jpg
d/d/6/dd69e7b37496c402.jpg
6/b/1/6b1b8d8e598c2b29.jpg
c/2/5/c252e1f217b21f98.jpg
b/6/1/b611204bbabce315.jpg
0/e/d/0ed02846e2b6f7a3.jpg
c/7/2/c724413f983f7ffe.jpg
c/6/8/c689522ea49c7b54.jpg
3/2/6/326de4f2dff431f0.jpg
a/4/9/a4922b5d97882bf4.jpg
b/6/9/b69b0a2f3e2b1070.jpg
4/d/b/4dba6d90c843fe7a.jpg
4/e/e/4ee95a9b68bb3389.jpg
1/e/f/1efa9ae3fa1b6dac.jpg
1/4/0/140ebefee79f1ed9.jpg
e/8/4/e8403fd76378665a.jpg
d/e/5/de58a921c2279312.jpg
9/2/d/92d38acb0c9825dc.jpg
2/0/b/20bd47d7284b7077.jpg
3/3/6/33669fc94aebfb6d.jpg
e/3/6/e369007d4b50cce8.jpg
d/f/7/df7fcc7dbd40e311.jpg
4/4/7/447f98f45f190745.jpg
2/c/d/2cd969b604b1a55d.jpg
f/9/8/f98f39fdfe3e42e1.jpg
3/f/1/3f162ba74eab5e9a.jpg
c/d/5/cd5c0c2ff5366109.jpg
9/5/f/95f136cb0b242555.jpg
c/c/9/cc917dafa1734d62.jpg
a/4/f/a4f9a97fc5bb0440.jpg
0/0/5/005315ae2bddb30c.jpg
1/0/4/1048be82f92343e8.jpg
4/2/9/429dd6100a31ea51.jpg
2/4/3/24381d3a1d8dc57c.jpg
3/3/3/3331d67b6a565a7a.jpg
9/3/4/934b753ec3cc4bf4.jpg
9/c/d/9cd9584ad3a5422a.jpg
1/4/c/14cf14f7cfeac10c.jpg
a/e/f/aef3e6c99a208a81.jpg
0/8/d/08d431c9dc9d9ed5.jpg
5/c/3/5c3b6b86d9a82355.jpg
8/7/c/87cc7fe01ed2f1c2.jpg
5/2/6/5260bdfb865497f7.jpg
e/8/4/e84e7d265931bc56.jpg
a/7/2/a72cbe06ba8f0672.jpg
b/e/b/bebc3759ec6cc2d5.jpg
0/5/b/05b1af78ebc33e77.jpg
0/4/1/041e13df2aef339f.jpg
4/0/0/400131d109158c1e.jpg
b/a/1/ba1de366cf7de503.jpg
6/4/1/6413eeab3bdf16fa.jpg
6/0/9/6099531959fb6a1e.jpg
8/7/e/87e57e324cb60245.jpg
6/6/b/66b6c695771fd96b.jpg
6/b/1/6b16438f19f7f062.jpg
c/5/2/c52d53a8ce49e1ff.jpg
a/2/0/a20c187b713d8db8.jpg
f/5/c/f5cc42be46312079.jpg
2/c/2/2c2dfa10d60166cf.jpg
b/0/c/b0c9f07aac8c74cd.jpg
d/e/8/de830d91f3f55240.jpg
b/3/c/b3ced585a8440a5f.jpg
6/3/a/63ace685e03f44f9.jpg
e/e/b/eebbde91041f858f.jpg
7/0/4/704c323e5a3b00dc.jpg
d/c/9/dc9ee89735dca5f4.jpg
5/b/1/5b128b0db13ec7c7.jpg
4/d/e/4dedf31f2c87e2f7.jpg
3/c/6/3c690fb289c1b012.jpg
b/d/a/bda8eb20bffd65a2.jpg
4/3/c/43c6799dcd8bed29.jpg
b/2/9/b29e033493262624.jpg
e/3/0/e30b9a345f4fe133.jpg
2/b/b/2bbf3961ddfe0511.jpg
7/4/1/7411d96df5f8c36a.jpg
4/6/e/46e3cb64e5b432ba.jpg
e/9/d/e9d36cdfe6b5c73b.jpg
e/5/8/e5837ad24aa92e20.jpg
5/1/1/511e071f26bd2984.jpg
f/b/9/fb9aa99fe72944e4.jpg
8/e/1/8e157c98b2c84419.jpg
a/8/f/a8f7f45795d3e043.jpg
6/e/f/6efcf4c3dfd5b2ab.jpg
1/6/a/16a9317fd0e8cae4.jpg
5/0/0/500230b2860c222c.jpg
7/1/7/7171efe6d7b7966d.jpg
3/4/2/34258a236fe19469.jpg
5/5/d/55d3afbd84be9d28.jpg
b/a/f/bafaae8b580c58fb.jpg
a/1/c/a1c28aec06ef4a4c.jpg
1/c/c/1cce706a15c49f8f.jpg
e/a/b/eab93a4e8dbd3b06.jpg
9/1/2/9127e4e34ee58c8c.jpg
4/1/e/41e1354a19a91c70.jpg
7/6/0/760221eff2077f6c.jpg
5/e/9/5e922ede0b437da7.jpg
b/5/c/b5c6f1a2116c63c8.jpg
d/1/a/d1aa43c2af42e53d.jpg
2/c/3/2c305f3c887278d0.jpg
2/f/3/2f393e4c152f522f.jpg
c/f/a/cfab7cb6ddaad3b3.jpg
8/8/9/8898cb7c58293ab7.jpg
d/4/8/d48e653c6545146c.jpg
5/4/8/548930bf07c3b0d9.jpg
b/2/1/b2151d61a089ffcb.jpg
1/a/5/1a57da6f39335ee0.jpg
1/1/3/11315b225bffdb9b.jpg
9/f/8/9f8c472c3eb68ac6.jpg
f/9/d/f9d6b58de7fca388.jpg
d/7/5/d75a3c7904c9146d.jpg
0/8/4/0842550f486c1bcb.jpg
b/b/7/bb746593a1d2c925.jpg
9/f/9/9f9952777bd3b0c9.jpg
2/2/7/227f3e0a8076c4fd.jpg
9/6/9/96966dc2c8623aaf.jpg
3/0/8/3083b693bda20557.jpg
7/3/5/735f51690365d4c7.jpg
6/2/c/62c702b28e1aa24f.jpg
f/3/c/f3cec21e7bd4865f.jpg
e/3/6/e36bd9086c0c9cea.jpg
b/4/b/b4bd9dad076cd756.jpg
f/5/d/f5d3320780ba35d1.jpg
f/3/2/f32bddb00e84c516.jpg
2/3/5/23548cfefb404e19.jpg
5/9/7/597dc84755f91002.jpg
5/5/6/55621f2d794b80ff.jpg
e/1/3/e131039d2985f703.jpg
4/c/6/4c6e919687828e6a.jpg
4/b/6/4b6f2faff4144f6d.jpg
2/0/4/204a6774a490cbe1.jpg
c/c/7/cc72e7e220fd40f2.jpg
1/6/8/16870431c7b852d8.jpg
1/0/a/10a6c5f559274ffa.jpg
0/1/0/010f3506d8dc8a3e.jpg
2/6/f/26f6fced2cabb336.jpg
f/0/8/f08aa472c91a4478.jpg
4/c/d/4cd3564366a77e70.jpg
d/1/8/d1811f886044ec20.jpg
f/0/6/f068ff8ca415259d.jpg
0/9/0/09015637e3d62bd1.jpg
3/d/0/3d0cdd0269ecb70a.jpg
0/a/5/0a551c06611c4e85.jpg
6/2/6/62692ecbb6a599f9.jpg
7/c/9/7c9adc8ee60429fe.jpg
0/0/3/003474ffa661feeb.jpg
7/7/8/7782e06abffd60b4.jpg
4/1/6/416b1773bae8b9ee.jpg
5/0/1/50153a5bbd75de87.jpg
b/d/a/bdae4f6583bde0f5.jpg
a/0/1/a018270650a15a8b.jpg
3/d/e/3deaca2fed04d676.jpg
9/4/4/944e0ac7aa4a1adc.jpg
0/8/9/08974363320b28f3.jpg
9/2/b/92b300f5b0c76a6a.jpg
2/f/3/2f36c8cd1793bc8c.jpg
3/3/d/33dbd77450e0a6df.jpg
1/d/0/1d0aa69aa3b2c0b0.jpg
6/b/4/6b4551716f0b8c28.jpg
2/e/f/2ef4478b3b549e3d.jpg
d/2/f/d2f2238931a8e3d2.jpg
e/9/9/e9975f03d69c0f66.jpg
5/0/0/5001f9a080be4c11.jpg
6/1/b/61b11231c47dc5a5.jpg
4/e/4/4e4f4e660aa4e02b.jpg
3/4/7/3479a8b43c369f4d.jpg
c/0/d/c0da6bb2e0fc813c.jpg
3/5/5/355f844aa70e4d23.jpg
0/f/0/0f00c4fee57e0109.jpg
e/f/a/efa3b0ac0484160a.jpg
d/9/2/d92907fb02e742f1.jpg
5/3/2/532d8621185d8735.jpg
6/a/c/6ac7db839c2e7b67.jpg
1/8/7/18797120837d5df4.jpg
d/3/f/d3f723d52206f05d.jpg
1/f/d/1fd64f6e7926716a.jpg
6/7/d/67d4d642f271fce7.jpg
6/8/b/68beaf6eec36530e.jpg
a/6/9/a690ffbb52cd8986.jpg
2/2/2/2226d68c9edafc4e.jpg
7/e/6/7e68a716ca34ac1b.jpg
9/a/b/9ab7c38e14abfa39.jpg
b/8/4/b84438b499b19ea8.jpg
e/b/d/ebd74cd0172ff070.jpg
8/f/5/8f5504f71fe4c671.jpg
8/3/d/83df22b35eda8e69.jpg
1/f/3/1f359c8bd755d29b.jpg
b/9/0/b90add023c74e42b.jpg
2/2/e/22ede2d2f78363b9.jpg
2/8/f/28ffb5e9a5d4b64d.jpg
2/2/8/228ed667ac08072d.jpg
8/3/f/83f9229bcda1febc.jpg
8/f/a/8fa74efb0120c5ca.jpg
d/1/e/d1ec41e472c77d82.jpg
2/3/5/235e2077efe29a68.jpg
3/0/d/30db96098c566aba.jpg
c/0/f/c0fb7dc86bb413b8.jpg
6/b/a/6bab452444810b1c.jpg
f/1/4/f146197ace6cf148.jpg
8/a/8/8a8dc73b683c7270.jpg
5/3/2/53248419bd328564.jpg
5/d/a/5daf936d8cb59007.jpg
1/0/c/10c5b2c42c5b9cd5.jpg
3/9/4/394ab8140df49c77.jpg
4/f/e/4fe9e154dde11cb8.jpg
2/5/9/2599f44f7830c98b.jpg
7/7/f/77f57eb68eb58bab.jpg
8/e/9/8e97560ff2bfaedd.jpg
e/b/1/eb10b11162570307.jpg
5/3/6/5363a42d4af517dd.jpg
5/d/3/5d36659e38fc9a66.jpg
e/e/6/ee6d896e663cbb64.jpg
8/b/4/8b4b32987714ca3c.jpg
c/c/1/cc1d4387ac4795de.jpg
6/2/0/620ec5c687140f6c.jpg
9/c/3/9c32ae2b9f520e12.jpg
2/3/f/23f0391134aef8e9.jpg
5/c/5/5c5a4869bf3dee4f.jpg
0/c/f/0cf7e25b84737ebe.jpg
3/a/b/3ab304ad49f9fad0.jpg
6/a/1/6a1aba99df331b73.jpg
e/f/3/ef309ff148dd5a7a.jpg
5/d/8/5d8742f1211be36e.jpg
3/c/2/3c263d38e67c3ea4.jpg
a/0/7/a074c54a252296ab.jpg
8/b/f/8bf766c173117bf6.jpg
b/0/b/b0bacba457ba37d3.jpg
0/8/d/08dac6c86d533fc9.jpg
9/a/3/9a3278452a80b8fb.jpg
4/5/9/4596c9a97a376c8d.jpg
0/2/2/02257a43506ad18f.jpg
d/7/9/d79ef4fdf3179d40.jpg
d/a/c/dac6eee20c9f2362.jpg
1/9/8/19851e47672909d0.jpg
f/5/6/f567884881e0406b.jpg
4/c/3/4c315c36a627da7c.jpg
9/0/7/9071fdafc623e8c8.jpg
c/c/e/ccea6a78f64354bd.jpg
c/6/8/c689923e49e22555.jpg
f/7/6/f76beb5e434211a6.jpg
c/0/3/c03fb1b7e6bbdba0.jpg
5/1/c/51cde0b2bf8866bb.jpg
8/d/6/8d6c9fc413f27e3e.jpg
8/8/2/8825129cfebedef2.jpg
b/c/9/bc9b180d76885dec.jpg
3/3/9/339f63e1c9707361.jpg
c/b/7/cb7b2b316e7795d0.jpg
1/1/a/11a08b6db2006896.jpg
e/b/6/eb6509dbc8492023.jpg
8/1/c/81cd659337be138a.jpg
6/9/8/698948da97ffe4bd.jpg
0/d/4/0d470378ef6939d4.jpg
6/7/f/67fb13898c694b95.jpg
8/d/e/8de9367843f75419.jpg
4/e/6/4e6bf91ebfdb3282.jpg
4/d/8/4d8706158cd337c6.jpg
b/4/2/b423fa264e09c8c6.jpg
a/8/5/a858517546603edb.jpg
7/e/f/7eff5c939c77d5d8.jpg
b/d/d/bdd0a60f5ab2b60e.jpg
9/d/e/9de458aece6e460f.jpg
e/6/5/e650975fdf64fa52.jpg
a/6/b/a6b4c3616bc51851.jpg
6/1/7/617c78aabe5e1310.jpg
8/4/0/8406c664512e4930.jpg
a/d/d/add5f19a517c544b.jpg
9/e/4/9e4728c63effa28c.jpg
5/e/9/5e9a1f5459be89e6.jpg
d/5/8/d58150111513c3d6.jpg
b/d/0/bd04abba0dec9b96.jpg
3/c/1/3c181ab97da4d8ab.jpg
e/7/5/e7520ccb11da354d.jpg
a/7/4/a74c080ee9fb9bf5.jpg
3/9/2/392ca5e35c269d39.jpg
0/1/f/01fed17a48b770fd.jpg
6/1/0/6101fff3776c45e7.jpg
5/4/b/54bcee19c62fa9cc.jpg
a/d/2/ad21a01d852b3f03.jpg
a/d/7/ad7d221631635547.jpg
1/d/c/1dc465249cefc56c.jpg
7/2/b/72bdfd43e28ddcd9.jpg
9/4/4/9447a7fdf85ac7a7.jpg
7/6/f/76fe2f591f3d3b77.jpg
2/a/1/2a12f01feee854fb.jpg
d/a/d/dad8025de2aa31d1.jpg
8/e/4/8e40beeb3e08961b.jpg
0/b/e/0be42a3163c77062.jpg
6/a/2/6a2483bc875e4bfc.jpg
2/9/6/2963a6a20c7a3c3e.jpg
7/f/a/7fac6fae8ad1eab5.jpg
2/0/5/205be219e3a510d5.jpg
a/3/2/a3241054613c510f.jpg
0/d/3/0d3d94e5f6815c11.jpg
2/d/a/2da29c792e9a7e34.jpg
b/5/c/b5c24fd18c918bd1.jpg
0/9/f/09f0b6c4c7d80d84.jpg
4/b/e/4be0bb4d85cb689e.jpg
f/c/a/fca937f4b556f56a.jpg
7/b/e/7be7ffe83aadd6af.jpg
2/8/b/28bf683f976a081d.jpg
f/e/4/fe4ebe5780996bb8.jpg
a/7/b/a7b2ebc4257daff4.jpg
b/6/4/b64744ab21576b29.jpg
d/5/9/d5998eac1e3d4e84.jpg
c/2/2/c2277fdc9e56eb75.jpg
2/1/d/21d02246949204ba.jpg
9/2/0/920751afe3c7491a.jpg
6/e/b/6eb3b04bd47e17f8.jpg
9/3/c/93c577ab0cdcdd3b.jpg
d/b/0/db05f87116817ddc.jpg
0/5/c/05c6c9d972e52b16.jpg
9/d/1/9d1e62d591882c68.jpg
9/b/0/9b06f7cee80bba95.jpg
c/8/5/c85cca0627f7f297.jpg
9/f/a/9fa1327e2937cbe2.jpg
0/b/c/0bc9c829341c53fa.jpg
4/8/7/4877ebee327eac55.jpg
c/9/1/c9170c2eb04757fd.jpg
0/2/c/02c489081ee2d9f1.jpg
f/6/7/f67f1846c716df72.jpg
4/1/4/414792e853febe22.jpg
7/b/8/7b8f954f9c2537b7.jpg
0/e/b/0eb150b381523b93.jpg
3/e/6/3e6c6a2b6e1a80c3.jpg
a/4/a/a4a5484cf87e3430.jpg
4/f/b/4fb44182eca6a5e7.jpg
a/1/f/a1f1ce5d503d9c10.jpg
5/a/2/5a22c859f8aeb297.jpg
7/4/0/7408d636a1bdced8.jpg
e/e/6/ee673e51736b7e16.jpg
1/4/0/1408620b6d184ccf.jpg
3/e/2/3e2eb95490a9d89c.jpg
e/7/6/e76a4e8f14965fec.jpg
9/d/c/9dc016a16b993ca5.jpg
2/3/8/238ad872dc412b6b.jpg
c/2/f/c2fd0bd146655eab.jpg
4/3/b/43bfadd400516a9e.jpg
7/f/e/7fe85965ed159dc5.jpg
1/b/5/1b5a4b33da3793c3.jpg
6/6/c/66c046334879791c.jpg
6/5/0/6505292f98e4e3ae.jpg
2/a/4/2a49976abbaa3924.jpg
e/d/b/edb1b2705a571ed9.jpg
d/5/3/d53cfa72fb09231f.jpg
7/c/f/7cfaa63ee9c7d557.jpg
9/f/2/9f2d86cf720eac1c.jpg
6/1/1/6113844ac455e8b1.jpg
8/9/6/896a09e3f6269610.jpg
3/a/d/3ad9f95a5cc1baf4.jpg
f/2/8/f2810c49f00c0dc3.jpg
3/0/6/306da353c3e214b9.jpg
4/8/6/486c34d6f95393a4.jpg
b/d/f/bdf03126025faadb.jpg
7/e/b/7eb6ca34bc065b24.jpg
b/7/4/b74618d34e937acd.jpg
1/5/b/15b19e7b8fb36a49.jpg
7/a/5/7a598136bbcad3e2.jpg
e/1/6/e162de6cf8b08f4c.jpg
d/2/4/d243201d408d3688.jpg
2/d/c/2dcaff4252d7f483.jpg
8/0/3/8039790c609a2aa4.jpg
2/2/7/227dd80af961218f.jpg
5/9/4/594c7a9e2f2a0494.jpg
b/c/7/bc75392e76a56eac.jpg
1/d/3/1d304842f450c0d3.jpg
8/4/b/84b9cf448714ae98.jpg
8/4/b/84b2f09eee11a891.jpg
7/b/d/7bd210c3e53300d4.jpg
5/1/8/518655085e896406.jpg
3/e/5/3e5e147cb441cbb0.jpg
5/5/1/55150e72a7c1c1c5.jpg
6/2/f/62fa2c318d396c01.jpg
0/a/f/0af9543a4935b2fd.jpg
9/a/d/9ad294c9038cb279.jpg
4/9/e/49ef335c5949e23f.jpg
b/f/f/bfff1e2ef25e0d9f.jpg
a/5/4/a54c18b85a59b216.jpg
d/4/1/d411d0fe54474047.jpg
6/5/1/651377e336aae95c.jpg
5/7/8/578fcc64d9aa04c8.jpg
9/2/1/92109c84bab5edda.jpg
5/9/a/59affabcea699b8e.jpg
e/4/d/e4d265570e77d37a.jpg
5/c/a/5ca0b104b08710b6.jpg
b/7/3/b733378a911da2e6.jpg
e/6/2/e62a58cc9b5f8a2d.jpg
e/1/1/e114abea2b148777.jpg
8/a/1/8a1e03bddebbdf24.jpg
b/9/5/b950b86f32b4189c.jpg
1/f/b/1fb1f942e7f7e1f8.jpg
1/a/e/1aed2a72a12c2ee1.jpg
3/0/f/30fdee4a63d44357.jpg
a/e/6/ae636424714a2696.jpg
6/2/d/62dcc5c9f1c4b66e.jpg
f/b/d/fbd84ccd78823d2b.jpg
9/8/6/9860e76c59de0f19.jpg
2/d/2/2d25fd915c76ea57.jpg
6/d/0/6d038ff3f07fd39e.jpg
6/6/f/66f25b58245a2702.jpg
4/6/1/461d6c075b1b427d.jpg
4/6/5/465aae60b42e5ede.jpg
b/a/6/ba621fd8cb56878c.jpg
a/a/8/aa8e01d3044b7920.jpg
2/f/a/2fa0c81d18e8b794.jpg
e/d/e/eded1242d427a0a5.jpg
5/4/9/54909e1f42060063.jpg
f/e/d/fed1e9ae2ea30087.jpg
1/6/9/169a45f1eeb27f94.jpg
1/f/c/1fce218cfcc77cc3.jpg
5/7/9/57927848444b5d47.jpg
a/a/1/aa143fa5f7d1a132.jpg
9/6/9/96970a3e22b0ed46.jpg
d/f/c/dfc05debe41c0f27.jpg
6/8/2/682d24c101467401.jpg
a/0/2/a02b420df848ca1f.jpg
9/2/e/92ee191349d223d5.jpg
a/d/a/ada4314b1155e201.jpg
4/e/b/4eb035bb332be661.jpg
5/f/4/5f4b776764188320.jpg
8/f/9/8f920793a73626ff.jpg
0/c/9/0c9b2f5967406905.jpg
1/f/3/1f36b07a3db97bd4.jpg
f/c/1/fc1081d7ef7c8cba.jpg
e/b/d/ebd2343ffe25cc31.jpg
f/4/0/f4007b1b9c7016ae.jpg
5/7/5/575a482d4bf44a11.jpg
8/4/0/8408e8aa02bc18d9.jpg
6/d/5/6d52b18ba44b5397.jpg
3/f/9/3f9a61360b6cb648.jpg
f/a/6/fa6b410915dac851.jpg
1/c/a/1cac45eb896e293b.jpg
0/b/d/0bdf65e2ad903a49.jpg
8/8/b/88bfb60b72d5bbe2.jpg
0/1/c/01cdd811b3b4edea.jpg
8/f/1/8f1d48589068eafe.jpg
a/3/9/a39139228a724c84.jpg
a/e/e/aee1cc60eca93712.jpg
9/0/6/906c72e1b3199f99.jpg
3/c/c/3cc2716091dd50d0.jpg
8/4/4/844e8fb7de616848.jpg
7/f/9/7f9400d75aff227d.jpg
8/2/8/82807548c7d69f1f.jpg
f/f/4/ff480236aae808df.jpg
f/8/2/f820faec6554c824.jpg
2/2/e/22e9710a154d5c47.jpg
b/4/5/b459f8f636058310.jpg
8/d/6/8d69fda0e6fae658.jpg
1/1/e/11e85dc56dc1484e.jpg
8/c/5/8c545d7b6025e405.jpg
e/f/7/ef7483638163a272.jpg
7/3/a/73aa5b5d87cd847c.jpg
6/5/5/655c0e3716f23409.jpg
0/7/9/079f7354403ed3b2.jpg
8/b/e/8be50d275982683a.jpg
1/a/7/1a73e32180468ad2.jpg
d/f/6/df630a1fa3224276.jpg
f/3/6/f360b3a391c26210.jpg
e/8/7/e87e5cc9cafa3eb1.jpg
5/d/1/5d11c5441e44d83d.jpg
0/7/b/07bce177b766589e.jpg
a/a/a/aaadbaab367e2544.jpg
b/5/3/b53ba75e873ad615.jpg
6/e/8/6e861d3ba0abbfd3.jpg
8/8/0/880ea8356c970bf2.jpg
2/7/5/27561de6ea35b0cc.jpg
3/4/d/34d5abf655a9df18.jpg
3/c/8/3c82b7e2a7eddbe6.jpg
9/8/5/98580464536d9bba.jpg
4/f/6/4f6dd098978a2a3b.jpg
e/6/c/e6c745925c1a22fa.jpg
b/d/5/bd5bc6171391c75a.jpg
1/8/3/1837413cda6d5880.jpg
5/4/3/543a8079dda8b2ca.jpg
8/1/f/81fa977eca8ef82c.jpg
2/f/4/2f45f9af94d77fb3.jpg
b/f/3/bf3cfc75d1c8ed1b.jpg
8/7/4/874dd75325d54039.jpg
9/6/1/961bf5ea44df7963.jpg
0/9/3/093ef9b1436881ac.jpg
8/a/d/8adf11d78e29c1c0.jpg
4/d/f/4df512fd5d39f775.jpg
1/9/3/1933f4f654854347.jpg
e/3/c/e3c88e8e785cd000.jpg
6/3/4/6347a6087f2e0e7a.jpg
1/a/7/1a74e5d207fafd3b.jpg
6/7/0/67097d09cf70068b.jpg
e/d/c/edcd869c2c34abcf.jpg
0/8/6/08630798b487e710.jpg
5/f/7/5f7b4d3e9c402776.jpg
8/c/c/8cc79b48bb1f96f5.jpg
8/c/7/8c70be76ee073143.jpg
2/e/4/2e4ebd8be66e246d.jpg
e/0/a/e0af0cb91727e75c.jpg
b/6/6/b66961287daa023c.jpg
1/d/f/1df08f9e665582b0.jpg
8/b/a/8bae808ba4ad7a29.jpg
e/d/4/ed479c6db5847069.jpg
0/7/7/077b464c8d36d37b.jpg
f/5/6/f568075eb699b561.jpg
7/5/9/759db57f319d707f.jpg
1/9/1/191dc0f7a0ace01a.jpg
7/8/e/78e48be77663b0e3.jpg
5/a/4/5a4099184f510b72.jpg
c/9/6/c9621bddf809cbf3.jpg
0/4/7/0478d72053fb3b3b.jpg
b/6/8/b68bc07813106351.jpg
c/9/c/c9c560fecb386c57.jpg
a/9/5/a9530bc73f0be87f.jpg
a/5/5/a55df8c84ffa20f5.jpg
b/9/e/b9eaca8c7700c52c.jpg
5/a/1/5a15a302446fc3a6.jpg
4/8/5/485097abb2eb0f27.jpg
5/a/4/5a493e34bf616ace.jpg
f/0/a/f0aea4ab6588a2a6.jpg
1/2/f/12fff0d1b63f4525.jpg
d/f/0/df0faec4b7b1de43.jpg
9/7/9/9791037a42e33625.jpg
8/4/6/846a0029407efde0.jpg
9/c/6/9c69aaf4f2ea074c.jpg
b/0/2/b02727a4f28621d7.jpg
2/9/f/29fb4843edfdb896.jpg
3/b/4/3b458efcd77b7809.jpg
f/8/b/f8b893c65bf3b6ee.jpg
6/6/b/66b23589e9856a5a.jpg
e/e/2/ee27ddc05dd370c9.jpg
a/3/3/a33242c84e6f7b10.jpg
c/b/5/cb5f63b87aef3e36.jpg
c/0/c/c0c8d0f31878dc07.jpg
7/7/3/773af16c2bc15c0b.jpg
6/7/6/67610fa318e85558.jpg
9/5/f/95f42a27b285fb64.jpg
d/d/7/dd7df1e0c16aeec4.jpg
d/1/2/d12a57aa5cca0ebd.jpg
f/7/d/f7dcba3472391701.jpg
a/8/8/a88018a8122ef79c.jpg
f/b/2/fb24d14d1aaa57e7.jpg
0/3/b/03b5a992a507de6b.jpg
f/c/8/fc89ddcbfee97cdd.jpg
1/3/1/13112f2c1e034271.jpg
7/2/4/7245fac58569fe6f.jpg
7/a/1/7a1be53963fe194a.jpg
f/1/5/f15fe8d6d9a70117.jpg
7/e/e/7eea1cc7621e0ec9.jpg
8/e/6/8e61876e25e657ff.jpg
7/3/a/73a9d5fa4d5ce8b4.jpg
0/e/3/0e3c7b70ca5e1c5c.jpg
8/a/0/8a0142216ea90e0f.jpg
8/b/e/8bed445841420cb4.jpg
a/7/e/a7e0b07be90b4740.jpg
0/7/1/071b197586a03da9.jpg
2/d/e/2de26a490204803d.jpg
9/3/5/935556e99c5495dd.jpg
f/4/7/f470c99a97314423.jpg
7/b/7/7b78b90ce1ed7139.jpg
7/9/f/79f659d16960e2eb.jpg
5/5/1/551107e3f4969b29.jpg
7/3/6/736b3f65a798d096.jpg
1/e/7/1e7e5d99b1d30b81.jpg
5/3/8/538fefcd3fce567c.jpg
f/2/e/f2e8ee98bd50b3c4.jpg
d/7/1/d710a306b9eee188.jpg
f/9/e/f9e4211bc228e4d9.jpg
8/b/9/8b92857dc97ff0a6.jpg
7/c/c/7cc36730f2d71b48.jpg
7/4/1/7412929fb029d512.jpg
2/e/d/2ed931e63488c536.jpg
2/a/5/2a57aad5d36a6947.jpg
6/8/1/681a13e7ed3a762d.jpg
d/c/a/dca628898e2f7e0e.jpg
d/3/9/d39490c9ef9805aa.jpg
9/8/7/9871d744c7a88cf3.jpg
9/f/8/9f881977a6908f06.jpg
3/f/5/3f57d0c04914756b.jpg
8/1/b/81b8af1a6acd0a60.jpg
8/b/5/8b5c9b3588425bc5.jpg
d/9/9/d994cba7d0d5e4ab.jpg
e/3/b/e3b4c1b581f0eb36.jpg
3/f/9/3f9cbff3a00c9f3f.jpg
3/7/d/37d15c761171a355.jpg
3/0/1/3014afdedea99634.jpg
2/b/d/2bdbf6de18370f53.jpg
a/5/8/a58fd8d0fd30d5df.jpg
1/5/d/15dcfaf4c0c0f4f4.jpg
8/b/7/8b7ec54dcbb73c87.jpg
c/a/b/cab617d32b143986.jpg
9/4/0/94018a949c696065.jpg
f/2/c/f2c4b3b560ffed18.jpg
a/7/d/a7df61264929bfbf.jpg
4/3/e/43edb4ab29656b3e.jpg
0/9/c/09c5fd2ec7e1cecb.jpg
3/c/0/3c0cd6aad55138e6.jpg
1/8/b/18b6221913a283e1.jpg
b/1/c/b1c59fba6e7ed5f8.jpg
3/a/e/3ae7f9b952b519a1.jpg
1/b/7/1b7681369fcb5200.jpg
c/3/4/c346b30c26603070.jpg
6/4/0/640326ad2a2135bd.jpg
2/1/8/2189f59197ad8311.jpg
f/a/9/fa9073c670513ea8.jpg
5/f/5/5f5ac725cfa9ff5e.jpg
2/7/2/272d8eb0e3dc6cbf.jpg
6/8/4/68434abaafc24567.jpg
9/a/1/9a136c319c11058a.jpg
d/1/0/d103798f3b44e55d.jpg
4/b/7/4b79cfaa56f3124d.jpg
c/e/3/ce39e8e60aad63ce.jpg
f/f/4/ff413755c54f8ae4.jpg
6/4/f/64f9ab6460b44e85.jpg
a/c/0/ac02438b0514603a.jpg
e/f/2/ef2afdd7eee33d8f.jpg
4/8/4/48482acdae5066d3.jpg
a/2/7/a27586d9d5db17ba.jpg
7/4/4/7444523afd3b9ee5.jpg
a/6/2/a62c548c72e0955d.jpg
8/c/3/8c35399099a64481.jpg
5/f/d/5fd683159618cf03.jpg
5/6/9/569f6fc9a4617e55.jpg
4/c/3/4c31122a6575b897.jpg
2/3/1/2312f1b33e05d36f.jpg
b/3/2/b3273a8c25d0c2c7.jpg
0/e/f/0ef5c9237dabc190.jpg
4/e/2/4e22c6e5ba39a742.jpg
e/f/4/ef4d4c1d35fe2f9c.jpg
5/e/a/5ea9f8822e70e3d3.jpg
3/6/1/36110a7cd1c21122.jpg
4/1/b/41b73625b66b43ff.jpg
2/a/2/2a22fafe34edb8ad.jpg
3/6/a/36a46f11c5728108.jpg
0/8/4/084503e881c3d0c1.jpg
7/6/2/762de99ad20a2df2.jpg
5/e/5/5e55743707c43c6c.jpg
d/4/6/d463d3e9d42b6167.jpg
5/f/c/5fc55dc79a2b346c.jpg
4/1/b/41b903c41eec9478.jpg
3/9/5/3954015c15593925.jpg
4/3/2/432f4923ad936685.jpg
9/6/7/967acdbe8ebe6c7d.jpg
8/5/d/85df9d12c76a9a07.jpg
f/f/5/ff599bc9ec88baf2.jpg
6/a/4/6a4a0be08dd9a63b.jpg
6/c/7/6c7035da340c8827.jpg
6/1/2/6128cb3e12b13ba3.jpg
c/7/7/c778821132fbef91.jpg
b/5/6/b56aa1c903f84099.jpg
3/e/d/3ed54ef56820b954.jpg
8/6/3/86389e0e1f937e74.jpg
5/2/1/5216fac9f579cd44.jpg
7/0/6/706d8f17c56c0c00.jpg
0/d/6/0d64887c2e0a1183.jpg
8/b/3/8b3177fd5fbdd043.jpg
b/6/8/b68cde4bb19eb53c.jpg
5/f/c/5fc4a155df11e157.jpg
4/2/c/42c60fea8538bae2.jpg
0/5/5/0558839eae5d867f.jpg
9/6/2/962778db6a3cbac0.jpg
4/4/0/440bfd1ccd91a6ca.jpg
6/0/9/609ca5a11ae7b785.jpg
c/a/4/ca4500af52ae1c3f.jpg
6/b/3/6b3606a6f5aa1df1.jpg
3/7/f/37fb5132b9b3bad9.jpg
e/6/c/e6c3d73994b475db.jpg
5/2/c/52cdafc7b456b21e.jpg
d/0/1/d01e5f9f3b55adae.jpg
7/d/b/7db5c1e82fc260a7.jpg
6/a/1/6a14728d5d8348ad.jpg
f/1/b/f1bd4ae0e9346143.jpg
0/e/f/0ef8876c26e39899.jpg
1/f/2/1f2a4517bd1bc86e.jpg
9/e/7/9e7367ca4612b041.jpg
8/e/c/8ec196bbd6d5d843.jpg
d/b/4/db4aeb9abf00bd93.jpg
5/1/b/51babfda81e0f3d8.jpg
9/9/e/99e78cbcb85944f5.jpg
5/0/8/5086a2d768f8ed1f.jpg
f/e/d/fed1f98e18aade26.jpg
3/d/2/3d23a23d83a4496e.jpg
3/8/a/38a4986c4bc1d4dd.jpg
6/d/1/6d15074d0e372621.jpg
4/2/b/42b5065d9718d769.jpg
f/5/2/f52b2efa3ebdc79b.jpg
1/7/f/17f9b152f497ea50.jpg
e/9/6/e96dca4c38778ac1.jpg
5/0/3/50363e222de5e029.jpg
5/4/7/5471b0f4ab7126c0.jpg
d/6/5/d65965d1a2fcd0c5.jpg
a/f/d/afd9af2d9dc66232.jpg
b/2/7/b2728d26db7e1c0b.jpg
1/c/5/1c55609b33b8e63d.jpg
f/7/a/f7a8cf9afa122cd8.jpg
2/9/3/2934a594cc5de85f.jpg
4/9/1/4912babe4e803e3d.jpg
7/b/3/7b3d73c4185d0259.jpg
3/c/d/3cd60564ba278c4c.jpg
6/3/1/631be451331f3305.jpg
7/0/8/70859c5f5f2baa68.jpg
a/f/e/afe5abd0e507282b.jpg
2/8/d/28d0dbab202ddcdc.jpg
9/2/c/92c4f7da430e3738.jpg
3/5/0/350c69b0b191f6ff.jpg
1/d/2/1d25c86e83c96366.jpg
0/f/b/0fb5105192fcf913.jpg
8/9/c/89ce6d8abdb72548.jpg
5/2/e/52e7dc61c3a55375.jpg
6/7/c/67c642baff9081a6.jpg
2/a/2/2a26b67fb6ccda87.jpg
a/0/9/a09ff7ea975f3d3e.jpg
5/7/8/5785b6cd99c6e387.jpg
b/7/4/b747d598d5476f05.jpg
d/6/5/d6572dd9ca9fdf0a.jpg
4/b/b/4bb92a5d1698cba0.jpg
6/5/0/6507903ade3ea258.jpg
9/d/a/9da0099f6a2f76e5.jpg
8/e/6/8e61611a1d86bbd9.jpg
8/f/e/8fee04c04ba9c78f.jpg
8/d/a/8da39a9019f36012.jpg
1/4/0/140263de38ac8c4d.jpg
9/b/6/9b63c09748863517.jpg
f/f/1/ff12a2bed64927c5.jpg
c/8/6/c867eda2972b0493.jpg
a/1/4/a14e0c07a2c9a3dd.jpg
f/3/3/f339bea6c79d225d.jpg
4/f/a/4faef46fbccf15ce.jpg
7/1/3/7134e0d18152c959.jpg
5/a/5/5a53f0b7e58624cb.jpg
9/e/c/9ec8753afc843749.jpg
3/c/2/3c2ab1c7e4558f77.jpg
c/5/2/c52fc36eaff89ee4.jpg
b/c/4/bc4da0e02b9a856f.jpg
d/3/7/d3720626062b83c5.jpg
a/a/7/aa7934d9c96c73fc.jpg
0/5/4/0549b03546f477a2.jpg
4/c/1/4c15cdb3e10046f5.jpg
b/b/d/bbdd9258ba849040.jpg
d/1/4/d1447fe2ab3c8470.jpg
2/8/6/286031a957ea75b4.jpg
6/b/6/6b6e9676811d53bf.jpg
3/b/e/3beebf098b8192c9.jpg
5/0/1/5016ea302faf4385.jpg
3/5/4/354878a3f546cf17.jpg
2/7/7/277554195c42da17.jpg
1/7/c/17cbf73accdd6290.jpg
8/5/4/8548a921219fbf14.jpg
7/a/e/7ae09b14462171c8.jpg
9/3/8/93835736fb76279e.jpg
2/7/3/27376fca74ec9cbe.jpg
e/0/7/e07f25dc3dffcbe9.jpg
c/0/9/c09ff033a27627d1.jpg
5/3/d/53d1ac9c6b83c6fc.jpg
6/e/0/6e01f6497b288619.jpg
2/4/3/243e5a06b3bbcb48.jpg
e/e/0/ee04615cf66435a6.jpg
6/6/a/66a6b50f2127f107.jpg
a/b/7/ab79611a787cc397.jpg
5/3/d/53dfd9015178364d.jpg
b/f/5/bf5adf320269417f.jpg
9/9/2/9926f0d27239dbaa.jpg
5/d/8/5d8f4d9a2abc87dc.jpg
d/1/3/d13fa31c1fedd522.jpg
1/5/b/15bfbbea6c2f8bab.jpg
f/7/b/f7b6444bd36e1d7e.jpg
f/4/b/f4be5503a0887d52.jpg
3/8/c/38c778d9e3a81372.jpg
d/d/2/dd2a62bfeac078b3.jpg
7/f/e/7febc7822fa2ba15.jpg
0/3/2/0320ec80165c5342.jpg
9/c/7/9c72aab1cb739993.jpg
4/3/3/4330d3d63ea9e8c7.jpg
7/0/8/708191f96e0c7ad3.jpg
3/6/3/3630b620f73640b2.jpg
a/0/5/a053e4c9cf7bcfea.jpg
f/c/1/fc114283a5be1e2a.jpg
4/0/a/40aa6231f2fb78b2.jpg
4/4/2/442e7b165a2e38c5.jpg
e/9/0/e9068bae48136e92.jpg
c/e/e/cee777db9e258168.jpg
f/8/3/f83b02f32c4f8706.jpg
d/9/1/d9172d190dd1b255.jpg
b/0/9/b096f9ce2c168a69.jpg
9/5/b/95b899a8944a9f31.jpg
6/6/9/6692e15b8ac12cb6.jpg
2/b/3/2b3920977327818d.jpg
0/6/4/0649738eef87b7bd.jpg
8/e/b/8eb52c7bf07197f7.jpg
1/7/f/17fd18abc1314b29.jpg
7/7/f/77fb9df83d600a87.jpg
0/7/c/07c0f61f76394d66.jpg
c/e/a/ceab21f25cdb0794.jpg
f/e/d/fed96ed6eb95c8e8.jpg
3/a/d/3ad796a6f7e1cc40.jpg
5/5/4/554922c7c17d5aae.jpg
6/b/5/6b5899d3b70449f2.jpg
7/d/6/7d652c620e157815.jpg
c/4/4/c4487fc935524cc1.jpg
6/6/8/66890fb41c8cd59d.jpg
5/2/2/52261e944bd7128c.jpg
6/b/c/6bcddce56b9e4521.jpg
e/b/6/eb63908ee226c681.jpg
5/1/1/51167ef5f5c41623.jpg
3/4/4/344bdb66714a2765.jpg
3/6/1/361a6122483f638b.jpg
f/7/a/f7ae57808009ac41.jpg
8/2/c/82c4a4af544d91cb.jpg
7/5/b/75b23020ac3f57a2.jpg
5/6/e/56e344ea7dc6062b.jpg
b/5/5/b555d032a737a305.jpg
a/7/d/a7d160c839d9d5c9.jpg
1/c/f/1cfb3f4c37a72b00.jpg
3/0/9/3091e677de9754dd.jpg
3/b/1/3b1d948b79d33f85.jpg
c/f/4/cf4bee29649dce7c.jpg
f/4/2/f420218cc299577f.jpg
7/3/3/7332b0960a291343.jpg
e/f/b/efb767f3929b7e3e.jpg
7/d/2/7d2455065ee7b7a9.jpg
f/1/c/f1cfacf490397e3d.jpg
b/e/6/be6fada7f69c7e38.jpg
2/6/5/265c1c268faf437b.jpg
7/0/8/7089246ef42abd8f.jpg
c/6/8/c68f8efc99777ab8.jpg
7/8/1/7818e8368de539a5.jpg
6/c/8/6c8711c5c521ffb6.jpg
0/4/d/04ddbd6998114a1d.jpg
0/d/1/0d17af8e84c1fa53.jpg
c/b/b/cbb4233dfccd2583.jpg
0/1/3/013289843ce46aea.jpg
8/4/c/84cb0c33f6c21a5d.jpg
3/a/a/3aaa9127303d988e.jpg
6/4/2/642f88e7280388a3.jpg
a/3/0/a30cc8b9c58088e1.jpg
6/1/3/613c8a6f2c24fe11.jpg
9/0/6/9064a725dff36ee4.jpg
f/7/5/f7598b6eee45342f.jpg
4/3/7/4371f03783fdd39b.jpg
1/7/2/17248684880b737f.jpg
f/a/5/fa561a4d338cad48.jpg
5/9/8/59876ef10316d914.jpg
e/7/4/e74546a5d3f81714.jpg
7/5/2/752568f6d226f79e.jpg
f/7/6/f768779975e0276b.jpg
d/a/9/da98723de36663b6.jpg
7/4/0/74056795c6e27cc6.jpg
a/0/5/a05e0d5d69d3644b.jpg
1/0/a/10a44ee8308cc46d.jpg
6/8/0/680f44e1853d78db.jpg
7/d/5/7d5ea29faf922380.jpg
d/6/3/d63c007df0f9ae88.jpg
2/0/7/2079773df91e0fd1.jpg
1/c/7/1c732c8dd281ea03.jpg
a/4/8/a48ab165885a60cf.jpg
d/3/d/d3d941cce2446262.jpg
8/4/d/84d8f1c214f4b8c4.jpg
2/5/b/25b608ac400f78fe.jpg
5/d/3/5d331dc92c3830b8.jpg
b/e/6/be6758ae83ecd696.jpg
6/b/4/6b474ae04206d63c.jpg
c/b/9/cb94205a443d83b6.jpg
a/d/5/ad5d7fc73bfa4b00.jpg
9/2/7/92768f0a9cb948d1.jpg
7/0/f/70f07c9f506dc648.jpg
d/0/4/d04ac0edbfc1856f.jpg
6/c/8/6c86d75316ef8f15.jpg
6/f/2/6f26ceac5512904d.jpg
e/1/0/e10bf12cace47d3f.jpg
7/1/0/710616d5bb41b95d.jpg
7/1/7/71736b2942bdcc46.jpg
c/1/0/c1004be3861cda1f.jpg
b/8/3/b830f19bff78a812.jpg
8/7/9/879aea06af1638f7.jpg
c/1/3/c13ce26f9bee16c5.jpg
f/c/7/fc71ae2cbb322d3b.jpg
2/0/f/20f8f5d3474599c9.jpg
2/d/d/2ddfc6e1b4e7bb1a.jpg
d/2/a/d2aefdb7b97aeaba.jpg
9/c/e/9ce8bb0b919a24d8.jpg
0/3/d/03d47c667857a87a.jpg
a/5/1/a51d1fe7979e8568.jpg
c/f/6/cf6536cd14bac484.jpg
c/6/1/c61516efa985fa02.jpg
c/c/1/cc16277ef7ab419c.jpg
f/6/d/f6d7d148117180b8.jpg
9/a/4/9a4d708707d9e497.jpg
c/b/1/cb1336e2a7992fe2.jpg
b/8/d/b8dab9ed76c60b43.jpg
8/1/a/81a79983d392a3fe.jpg
2/6/6/26601b106f9a5676.jpg
8/5/d/85de554300c9d969.jpg
9/d/9/9d920b2c3d7105f4.jpg
8/e/a/8ea01713455292c0.jpg
0/e/c/0ec6f7523af33e02.jpg
7/9/9/7996c9bc927c7096.jpg
7/e/e/7ee42f70cccf6945.jpg
1/a/c/1aca5e7772d81a91.jpg
8/4/b/84b6d78069d9458f.jpg
3/e/b/3eb867836e9e3898.jpg
4/6/8/46828d463aeb06ef.jpg
a/7/5/a75f5f0cbe2b68f1.jpg
7/0/e/70e54c2bfc2e5dd2.jpg
5/b/f/5bff88e2e35094b8.jpg
3/c/5/3c5652f2340c59fb.jpg
d/d/1/dd195a3ea268ce55.jpg
c/1/c/c1cbe71debba612b.jpg
8/2/b/82bc670f7d0bb099.jpg
6/f/2/6f282f11a8a98787.jpg
4/6/8/468b4bd131c664c2.jpg
2/0/f/20f758628bd54545.jpg
e/e/4/ee4d4f9594c2b65b.jpg
6/f/f/6ff3e6f5e9e0b7f7.jpg
3/5/6/356ce78a55abd495.jpg
a/e/e/aee84093405d81a8.jpg
d/d/0/dd09ce4353fca6b7.jpg
3/6/7/3677f67031ff56bc.jpg
c/3/5/c3531446e582fc30.jpg
e/2/1/e213ef297b606053.jpg
b/8/7/b8773183e8d9c437.jpg
e/d/7/ed7b00c016d2e8d4.jpg
c/4/f/c4f2c19c0c6ea269.jpg
d/0/d/d0deefe35e0f9bfb.jpg
8/8/5/8851afaaaf87ce25.jpg
2/5/b/25be194c4aeaaccc.jpg
5/2/5/5253a88cbf5229f3.jpg
8/c/1/8c17b51c6bee23d9.jpg
3/8/8/388a7e2bb4ff2b3c.jpg
a/a/d/aad57a2686b52d6f.jpg
e/0/d/e0d7e2078c964ea1.jpg
a/5/1/a51b3c56df6f7168.jpg
f/0/0/f00fc45aa4fd1b7d.jpg
9/7/e/97e8cbcab1553bec.jpg
6/4/f/64f56c7363977608.jpg
b/8/0/b801ad0dbbb6ca9f.jpg
8/5/1/851575c58e12a8d2.jpg
7/4/4/7440e3f543d70a40.jpg
b/5/9/b5969261b259bc31.jpg
5/8/6/5862791abd77fd3c.jpg
a/f/7/af7d4e0927290b36.jpg
4/2/7/4279088964ec26ac.jpg
d/f/9/df93a3e33d98349d.jpg
3/1/0/310975c2b912c39b.jpg
c/f/6/cf69a28237bbbc3a.jpg
0/a/8/0a8f26147a6963a0.jpg
9/2/5/9258f687d8b19d91.jpg
5/4/4/544d01cc87539b54.jpg
7/d/1/7d12ad5abafdcc72.jpg
6/9/2/69290fbdd46af7bf.jpg
3/a/0/3a024774ab357ef2.jpg
f/a/7/fa796b9dc9b4df52.jpg
b/3/0/b301415bb3071da6.jpg
6/f/3/6f3efdee71506e04.jpg
6/b/8/6b857635a9376dc6.jpg
b/1/6/b1652f1a69c8ced1.jpg
b/1/0/b10f061589a47325.jpg
9/6/0/960c2c5c161845a5.jpg
1/b/9/1b929408fe3db633.jpg
7/2/e/72e836c917f84ed2.jpg
5/9/e/59e4ee0a4f1c2350.jpg
4/4/b/44b814deb9848a2e.jpg
a/6/1/a6162b267f699c97.jpg
a/b/8/ab8f382f4ed55e6d.jpg
2/f/d/2fd707b0533565f4.jpg
2/2/0/220362d6b1407fc6.jpg
7/1/9/719dea790ee63b76.jpg
f/a/7/fa797b94824c92de.jpg
2/8/b/28bfa21603a50a96.jpg
f/4/6/f469b2051fdde6b9.jpg
8/a/b/8ab8dc30ac19b16b.jpg
4/5/3/453223ec11399d4e.jpg
4/8/7/48729c71b8d030ec.jpg
a/6/5/a654320f7e294e11.jpg
d/b/f/dbff825cb28ac8d8.jpg
4/7/d/47d9ee336367041d.jpg
8/3/5/8353281b36aef372.jpg
f/1/6/f16bc4bbc85b9872.jpg
d/f/b/dfb208b83457ad28.jpg
3/8/6/38639ba6224cb113.jpg
3/5/3/35392592f75b0ef9.jpg
b/1/2/b12d776812b1d066.jpg
b/3/e/b3e0f80e6da195c4.jpg
9/a/6/9a64468af2520aa6.jpg
9/0/d/90d51969fd6e543a.jpg
6/a/c/6ac139daacf65294.jpg
d/1/f/d1ff51c951d6074c.jpg
2/0/6/20614470f822c037.jpg
0/f/8/0f88b332135f3bba.jpg
2/d/b/2dbbcf3bdd5a86c4.jpg
8/d/9/8d9fad7068a8a8af.jpg
3/0/4/30444d975311447a.jpg
c/a/b/cabda560d05f8305.jpg
7/7/f/77f6647b0b409df6.jpg
6/f/a/6fa1f1cb79363673.jpg
e/9/4/e944ec553aeab599.jpg
d/b/5/db595ec347fc40fa.jpg
b/f/6/bf6d61e763d4909f.jpg
8/e/3/8e37666af2f85401.jpg
5/3/7/5378b7dbb6cf8b99.jpg
5/d/f/5df35a186d18538f.jpg
f/9/0/f905964763ae893b.jpg
a/3/7/a372d32dc5051ff9.jpg
a/0/d/a0d280a8a5a70cbb.jpg
e/c/a/ecabf942eafb5fef.jpg
a/3/0/a30a6ef1b419d2b3.jpg
6/6/3/663a7d0ed561386c.jpg
4/e/9/4e99aa68de0ba8ba.jpg
c/7/1/c71f2714ed107e3a.jpg
a/0/c/a0c8f2d2464fb5c5.jpg
2/3/e/23e8b55e78c88778.jpg
9/e/0/9e087801ba8b19e3.jpg
0/1/9/019f4a1313217aa0.jpg
b/2/1/b218086cda336218.jpg
d/9/4/d948f748ef89e165.jpg
9/a/e/9aeeb2c0c6b43d0e.jpg
7/b/3/7b37048b86ef7cbb.jpg
4/8/d/48dd0a23ac17b6d4.jpg
5/8/3/583557da36ea8b6e.jpg
a/5/0/a5099d9a2e2fc111.jpg
5/4/7/54736fff7f52845b.jpg
3/e/5/3e54d37cb1a4a180.jpg
e/6/c/e6ca304eadce9b2b.jpg
9/1/4/9146ffe5db5890f1.jpg
a/1/b/a1b7b2a7a2872398.jpg
9/c/b/9cb30c4ea215641d.jpg
8/0/d/80d7b14821a0320a.jpg
1/9/3/193ecbfac90121ff.jpg
b/2/3/b23559bc5f63d42e.jpg
a/f/d/afdd974f55e9b37e.jpg
3/c/7/3c7febf50ffd3266.jpg
3/0/7/307921b41f7e42f9.jpg
b/8/d/b8dd8d175621d908.jpg
8/2/5/825d90f03a132ec2.jpg
7/d/4/7d48e2089f889708.jpg
c/e/3/ce3590cdd5a3a0e6.jpg
7/f/e/7fe2c078a2e8f06e.jpg
4/6/a/46a554b7a468543f.jpg
9/b/5/9b52e10c61da0224.jpg
2/5/2/2523854642720d6f.jpg
c/d/4/cd4d0a14623a1a10.jpg
a/d/4/ad4bbdcd55e0f9f1.jpg
5/2/0/520fc1c04e089fc7.jpg
a/7/7/a773617df70f951c.jpg
c/7/8/c78deabd9f4dc7a1.jpg
c/e/d/ced63b485ccd0262.jpg
f/0/2/f029855dc379df1c.jpg
6/3/1/631051128237e9e5.jpg
1/9/3/193c7caee695944e.jpg
9/a/5/9a5b741d87028b55.jpg
c/e/7/ce774e7dd31be2a1.jpg
5/8/d/58deba286f5f1038.jpg
d/8/c/d8c216b1780efdcc.jpg
1/e/e/1eea189feeb51722.jpg
1/e/3/1e33ca6bb3b04a6d.jpg
4/1/e/41e96923a915df42.jpg
d/9/9/d99c1e57d3d89d77.jpg
9/1/4/914a92ba13d6a33a.jpg
d/0/e/d0edf8fbb1706052.jpg
c/a/e/cae29d031de6ea35.jpg
a/e/f/aef83f38d5539eda.jpg
4/c/b/4cbf8990ebe336a1.jpg
1/9/6/196e360d80954804.jpg
d/7/e/d7ee874df1457ee4.jpg
f/d/5/fd54133e32391902.jpg
c/3/d/c3dfdec44e5c1ad3.jpg
4/6/e/46ec29e231a29885.jpg
d/0/3/d03424dc760f8b77.jpg
d/5/7/d57d2466c0c9fe75.jpg
c/d/a/cdaad1aaa4eff1be.jpg
5/1/7/517c127b12f33bf6.jpg
d/6/1/d61e67372cfb5651.jpg
5/2/4/52448b91899410ff.jpg
4/1/8/418f23e49157c2b1.jpg
a/0/d/a0d8c4e5afde799f.jpg
f/0/7/f07c7e5abd2182df.jpg
3/e/1/3e158fdcb9f063b7.jpg
7/8/e/78ed66ea6011eab8.jpg
6/6/4/664b8498815fd598.jpg
0/3/8/038a1a0e02a30f32.jpg
3/a/1/3a1d91dce1a6c37a.jpg
8/5/2/8522672e08c73789.jpg
0/2/c/02cf138b7950be37.jpg
6/3/d/63dd368173135b22.jpg
6/8/1/68173849469a7f61.jpg
d/8/b/d8b6f411750f3032.jpg
4/6/c/46c6788df8025f57.jpg
d/8/b/d8b2dfa2dd546389.jpg
a/5/0/a501ba9ddea98232.jpg
c/e/9/ce9bcdb67e39613f.jpg
0/6/7/067c4fc20e3f3584.jpg
0/1/d/01ddf57f43b980dc.jpg
e/f/f/effc42368b5c48c5.jpg
5/a/2/5a2862749ed8513a.jpg
d/7/a/d7aa5bd6a994e276.jpg
2/0/1/201e6575af76aed8.jpg
3/7/0/370d7ed496c5c3ce.jpg
d/a/f/daf5d35d1d625146.jpg
b/1/b/b1b52ba57a14ae22.jpg
5/0/c/50ce3522192bfb47.jpg
3/f/2/3f2e19c6a8d7dad8.jpg
4/6/e/46e7e732906fbd56.jpg
2/e/8/2e8f124025a45e8a.jpg
2/7/a/27ab8f452b16bdf7.jpg
2/1/7/217d462d64e046d0.jpg
2/d/f/2dfe8c4015ae48e5.jpg
c/5/1/c518db2bcfd7a0b4.jpg
9/7/c/97c7d3669cb85fba.jpg
3/4/1/341cc109dcd2e9d4.jpg
4/c/4/4c4c94659adf5381.jpg
6/c/a/6cab2bc7df417edd.jpg
e/e/b/eeb37c4c724c9b88.jpg
d/4/3/d436806e81003e59.jpg
4/c/3/4c3899fe7757f186.jpg
7/0/b/70bb67a67860e445.jpg
5/e/1/5e1e8cb4589780c5.jpg
2/c/0/2c069b29a7deef8d.jpg
0/1/d/01d160d26d1098c3.jpg
3/f/3/3f3d8a2f0f7c5c74.jpg
4/2/7/427eea7e85e71a5a.jpg
e/2/0/e20daacd19509635.jpg
7/e/2/7e2a15900fbd5563.jpg
6/1/e/61e1d47ca2a43b2e.jpg
e/d/e/edec5a231638b839.jpg
b/3/9/b3935a54ec9432d6.jpg
4/4/9/449b1a6b71e0847c.jpg
7/0/a/70afbe01c5f1e6bd.jpg
9/2/c/92c69a52ea552857.jpg
1/8/7/1871b2e85d6bfde9.jpg
9/c/1/9c1f2239f1dcf5e1.jpg
1/4/8/148fc03433200d5f.jpg
c/0/9/c09924d897b44b76.jpg
3/a/4/3a48886bb534533d.jpg
3/f/c/3fc96d5b0724f685.jpg
6/a/a/6aa171c0c25a1e29.jpg
9/c/0/9c0782ba81010c09.jpg
2/a/3/2a3d24a7df715c9b.jpg
1/5/5/155f36b40d8bdcb9.jpg
2/d/c/2dc028f87dc8ae34.jpg
7/1/4/714878e01d897c87.jpg
5/1/7/51707f658b8323f9.jpg
4/0/1/4016b769197579ce.jpg
0/5/1/0518bad20356daba.jpg
3/7/e/37e1bf584405a1be.jpg
c/8/3/c8304bab8747ec89.jpg
7/3/8/7384a3ca555d3329.jpg
e/c/d/ecde232bfe4c9300.jpg
f/c/3/fc33d350af8d8131.jpg
e/8/d/e8d9dc6d70de6244.jpg
e/c/b/ecb48d6025643d6d.jpg
e/8/5/e8531793ec96ace9.jpg
c/c/0/cc0aea873da74f50.jpg
e/2/c/e2cfd139463dccc6.jpg
9/0/d/90d989dd96e04725.jpg
8/4/a/84a47ee3646b9463.jpg
1/6/2/1624a89cc44ca7e9.jpg
2/d/9/2d9eaae46598e352.jpg
d/8/5/d855de81c6279231.jpg
3/3/a/33a51cc63436f07f.jpg
1/2/b/12b36d2f63bbce1b.jpg
3/5/1/351de771ec7427ae.jpg
c/4/9/c49b5e97d07e8734.jpg
8/3/0/83000179393edba0.jpg
9/3/5/935094e1b37e9235.jpg
6/1/b/61b814d1e5cf0acf.jpg
b/1/1/b11414e60a3fdcb2.jpg
9/a/5/9a54699ff8e0a6b2.jpg
6/0/9/609e5965dc1fa8da.jpg
2/2/c/22cc997afa784c66.jpg
f/6/9/f69ac7a46723364c.jpg
5/9/f/59f0215fb8ecb067.jpg
2/1/d/21d64ca4de389dfa.jpg
5/f/9/5f9e582d0b6cf9eb.jpg
3/1/c/31c135a9ff4238a2.jpg
c/6/b/c6b13cf2b929a5e2.jpg
4/e/6/4e61cf704086541f.jpg
c/2/3/c2349b02c93a217f.jpg
e/8/e/e8ead434d9d3da0b.jpg
7/5/9/759c24f90ceca25a.jpg
2/0/f/20f3bb636a8ed085.jpg
5/8/a/58a1bf6a13baee85.jpg
3/d/c/3dc43fab174c3ee6.jpg
0/4/5/04549221a4ee5743.jpg
b/2/6/b26739b178c1812e.jpg
2/0/3/203ba71fc3a26b73.jpg
9/7/d/97d774956707a117.jpg
9/b/b/9bb733fa0bbb9f6c.jpg
6/e/e/6ee2a63e08beac5a.jpg
7/d/b/7dbfd309058897c9.jpg
0/3/6/0367ae25af2278e5.jpg
1/1/2/112925f52cc6b060.jpg
2/e/a/2ea916322befe505.jpg
6/e/3/6e30c9e3940f701c.jpg
e/c/5/ec5e39722652822f.jpg
4/8/d/48da896a11a69b64.jpg
7/9/d/79d53b05f6e34bfc.jpg
e/7/3/e7387362bd12c041.jpg
7/4/c/74c87686e974c82f.jpg
1/1/1/111ca28df49ddc2b.jpg
8/e/5/8e5f24ddfb4cfdc7.jpg
e/7/d/e7d716f8a2ee6f18.jpg
8/a/c/8acadeae79a55487.jpg
a/1/5/a15de9ab82852efe.jpg
8/e/e/8eeefa42ded44937.jpg
e/1/6/e16aa8e1ae4e8680.jpg
f/5/6/f5651da219f8fa3f.jpg
1/3/1/131f90b4938759b8.jpg
c/b/d/cbd76ccb14e4751d.jpg
0/e/b/0ebebc7e8cef8932.jpg
d/9/b/d9b8d302af9ef3f9.jpg
f/0/5/f054844257ecf27b.jpg
9/7/4/974847ff42d347af.jpg
3/f/3/3f36f84d1a1465ec.jpg
8/0/3/803bce1d7317e945.jpg
c/b/b/cbbfafb64b00c79e.jpg
6/5/0/6502e4796a7954a4.jpg
a/5/5/a55974268d39ee07.jpg
1/2/6/12675dc8e180d629.jpg
2/5/7/257e610bac1284d3.jpg
f/9/8/f98b321058284075.jpg
1/f/9/1f93984ee8883e10.jpg
7/5/9/759b552be8400321.jpg
5/2/5/525af2b71127e377.jpg
f/c/1/fc130aed51ceee67.jpg
4/5/5/45599c703f807522.jpg
e/d/b/edb2b4565806d3f6.jpg
9/4/f/94f558f54a461923.jpg
9/a/1/9a117e65f4d2e387.jpg
e/3/4/e34caf14344d1774.jpg
d/b/e/dbe7e19a0c2b4767.jpg
6/a/7/6a7e9f673f7a9742.jpg
5/b/2/5b27d7a090f3e95f.jpg
f/8/1/f814f62cbb7ee6df.jpg
8/b/7/8b79df6cae5a7dbf.jpg
2/4/c/24ce8a8362be439d.jpg
6/a/e/6aefbe778dd0f4de.jpg
9/2/8/928ee4ab7545ee6d.jpg
d/8/8/d885fc2959caec81.jpg
f/9/8/f9843d50e79d31c7.jpg
1/8/1/181e52e50ef09903.jpg
6/2/0/6204d747a233d508.jpg
4/6/f/46f400c1cb7e5217.jpg
7/6/2/762f8b627616351c.jpg
a/a/d/aad42436f714ecbf.jpg
5/2/c/52cdaca24d9232d1.jpg
b/4/7/b471c90a5e2c6ab5.jpg
5/d/3/5d35bc3249a3b028.jpg
5/1/0/51061f5121c73b53.jpg
a/5/7/a57d98d1156d6294.jpg
6/9/1/691d06a51f2e50c9.jpg
5/1/d/51d23cfb75cfc9d3.jpg
1/9/7/197f9de5cdcaa487.jpg
e/e/b/eebbc93a4c09bb9e.jpg
b/1/5/b15163eeab0577d6.jpg
b/a/8/ba8e0bc2879a24df.jpg
5/1/9/51984c8e68ec285d.jpg
7/9/e/79e37151d3575e02.jpg
c/4/2/c42148d7b21256f2.jpg
8/4/9/8492f7d0d3577094.jpg
6/0/0/6003fb44b8eece7d.jpg
9/e/e/9eeaca143f52a5d5.jpg
3/5/f/35f8e8d0ca284723.jpg
6/a/7/6a7eaaa7f6be8dd2.jpg
f/e/5/fe5af16d4b0e490b.jpg
9/b/7/9b7d3609b89724df.jpg
e/8/a/e8a7e077e9bdf112.jpg
7/3/1/731ff40e38fabbae.jpg
7/8/0/78067d884b0add96.jpg
b/9/7/b97e612513cff172.jpg
a/0/3/a030f6c4a2a738e0.jpg
9/b/e/9bec639d6a049743.jpg
c/9/8/c98b58dc84c41e88.jpg
e/a/1/ea142e05c575ca4a.jpg
2/8/7/2877c60aa253c455.jpg
f/1/a/f1ade54bc32ac043.jpg
f/1/b/f1b7b3c48e0d2611.jpg
6/3/6/6360695bdb5b3cb6.jpg
2/e/1/2e11a43ff5f255b0.jpg
5/5/3/553cb4820bb68c5b.jpg
f/3/a/f3ae0f2044702933.jpg
8/2/5/825c192b4c47927c.jpg
d/4/8/d488dd2f8bef15d6.jpg
b/2/1/b2182f4990ca0869.jpg
2/5/a/25a0841a4b5d26cb.jpg
2/b/3/2b3d4b23235ed2c5.jpg
b/9/f/b9f0b694928e51ae.jpg
7/6/9/769dcdcde2eb1cf9.jpg
9/9/1/99130451b8fb9a1d.jpg
5/9/f/59f733b4fae32c35.jpg
f/e/4/fe4824d045d90f57.jpg
5/5/c/55c558248a85ecd2.jpg
8/0/e/80eb5d8cea63b838.jpg
c/c/f/ccfb58af5a3bab8a.jpg
2/6/7/26739618588b33c9.jpg
c/1/1/c110888648b46874.jpg
1/3/9/13993458164fbf5e.jpg
f/b/c/fbcac2ff2cfe0c4f.jpg
a/4/1/a41f11a9a9eea71e.jpg
2/4/e/24ef3a7073fe4361.jpg
7/7/5/775e66a4b0bc373d.jpg
5/4/3/543c6a27f2a83378.jpg
a/5/3/a535acabac83fb05.jpg
7/e/a/7ea6b4f6d6b593c2.jpg
c/0/9/c097083d2d7ad986.jpg
d/8/e/d8e018c12754c8b6.jpg
b/6/6/b661923b5d556893.jpg
b/0/d/b0db4387b46ea09d.jpg
6/a/4/6a4176dc9c7bd690.jpg
8/a/f/8afce029b3bb3445.jpg
6/5/b/65b4ebe8df5e7f9a.jpg
f/6/8/f68a7d3904e2b9b1.jpg
8/9/b/89b1bf7dd9dc4195.jpg
6/b/9/6b9709e3884553fe.jpg
c/f/a/cfa3f356d0c31b10.jpg
e/e/8/ee8d2be0a7a9c2b9.jpg
e/4/a/e4a9fb7d2dd8a6a9.jpg
8/4/b/84b027b3d34d68c3.jpg
9/5/5/95540901cdd1414f.jpg
a/c/7/ac79a655f6c3bc75.jpg
3/9/1/391130af0455e1db.jpg
7/7/2/7727ab843d06819e.jpg
0/c/c/0cc1b55fb79329e4.jpg
a/1/1/a11a74308390e75f.jpg
1/b/4/1b4daa61ceb53be8.jpg
a/5/0/a501e8ddff578349.jpg
a/a/f/aaf78013a7578cd8.jpg
5/e/b/5eb325fe86dcab8c.jpg
5/e/1/5e17e2f07e492c00.jpg
2/d/c/2dc42c7d3c2ba29e.jpg
c/1/4/c141a42dad680dd7.jpg
d/1/d/d1dddaf1fb6a983f.jpg
a/8/8/a8839bd6368a91d1.jpg
4/8/e/48ef9ae7270afff8.jpg
0/4/4/044c86875e6df085.jpg
3/5/f/35fd1958a2dacdf7.jpg
f/2/5/f250da61d423ea93.jpg
c/5/8/c589fcc9e2e45dba.jpg
a/e/e/aeeb574eaf2a4908.jpg
c/f/8/cf87a1f1302802af.jpg
9/1/8/91857f6040a5024b.jpg
2/d/3/2d37c9623a50812d.jpg
c/8/e/c8e252c95ad7d8bf.jpg
5/5/4/5542c002f938ca1f.jpg
5/2/b/52b9f32225fc84dc.jpg
5/c/5/5c5c3adcecd2fd39.jpg
1/f/b/1fb4a3fa42b234e3.jpg
f/4/9/f4967d3141078b9c.jpg
f/1/2/f12a2d6c8c19cd31.jpg
1/9/e/19e5adc7ae52d2d3.jpg
b/5/b/b5b62055651aea3a.jpg
1/8/b/18b2dc4c92b872ed.jpg
0/6/b/06bcd78dbfd9534f.jpg
7/c/3/7c345e66da536a49.jpg
4/9/5/4955b876a960f93c.jpg
a/b/2/ab28756e37c86793.jpg
3/2/1/32148b1619a95d2b.jpg
a/1/4/a14d6c5763153650.jpg
0/d/5/0d5525666a806338.jpg
6/1/0/6100b173c1b3dcbc.jpg
d/7/e/d7e67e812ac69afe.jpg
9/8/c/98cb09c79c94f157.jpg
b/b/9/bb9441e7904232ef.jpg
6/d/3/6d3eb62be22754fe.jpg
f/0/2/f0298f466e3920b2.jpg
9/8/2/98264d8dbb7cf716.jpg
4/c/5/4c50cc733b4e48c8.jpg
c/0/4/c0403f1bb52f4c46.jpg
5/8/4/5848aeaca306911a.jpg
b/8/8/b8889e27a271100c.jpg
c/5/1/c51480246a4a336b.jpg
b/3/5/b35e2b1cf0fe9b49.jpg
f/e/c/fec2325324ce07c6.jpg
0/b/d/0bda2243b393491c.jpg
b/1/8/b1844de725872b0d.jpg
b/0/b/b0b7d8af4024d200.jpg
d/8/e/d8e4c881f8adb8bf.jpg
2/0/2/202c5bb4003d7e50.jpg
5/9/3/5937f7456fe69bb7.jpg
f/9/2/f92f77b28bdc05e2.jpg
7/2/e/72ed5d7d42fb082f.jpg
8/3/4/8348d0e5d41d3218.jpg
9/8/a/98ac8b2c9858a2f5.jpg
c/5/0/c508af1c868fbda3.jpg
b/4/a/b4a9b6e4c1c21385.jpg
5/7/8/5784e09526eea3a2.jpg
d/0/7/d078f9d64da685fe.jpg
8/e/b/8eb8c2723bb72880.jpg
3/f/3/3f3fb27da0dd6924.jpg
d/2/b/d2b9e7c5d1855c53.jpg
7/e/c/7ec5f46f3a2710c2.jpg
f/3/7/f37e54e13c7dac39.jpg
a/9/a/a9a29419f10655f9.jpg
3/8/a/38abaf225d7f0446.jpg
f/c/2/fc240fe39864b019.jpg
0/d/4/0d4e98e0a8a9c288.jpg
7/4/7/747cc81f2b678306.jpg
8/f/3/8f371cf61c9ed5f3.jpg
8/c/3/8c38f3bf8cd694fb.jpg
b/7/8/b7884717af21d63b.jpg
2/e/6/2e65c711b01dd1a6.jpg
2/0/b/20b6bf4e1c5cdb66.jpg
4/4/6/4465e2dcaf963bd0.jpg
f/a/0/fa0d0322ae21294b.jpg
4/1/5/4159840201a9888c.jpg
d/c/9/dc9737eee70534e9.jpg
8/6/f/86f29ff9bbdb2507.jpg
e/c/1/ec1d8d92c06702a0.jpg
8/3/b/83bbbb28ad039612.jpg
0/9/1/091d63b6a4ad1b03.jpg
b/e/0/be075392cd627b4b.jpg
8/5/d/85d9b4b6f385b463.jpg
1/a/0/1a0f5db2706a79e1.jpg
0/6/e/06ed3b7f1fe809c5.jpg
1/3/3/1333b20e11283d3d.jpg
0/7/b/07b566b6289c692e.jpg
e/b/2/eb2d4516f05e0ff1.jpg
3/0/1/3010ab25b744bfeb.jpg
6/f/7/6f70f7f8eea7540a.jpg
8/5/4/854ada6027872a04.jpg
b/6/8/b6825b8d7dcc7f00.jpg
d/f/6/df6ba0b984fe267d.jpg
8/4/a/84acd8cb452c1896.jpg
1/d/c/1dcf220eac8c3981.jpg
8/6/8/868402feaf5acbd0.jpg
2/a/6/2a6933ed36932301.jpg
0/f/0/0f0cee4c0fc0f8b1.jpg
3/d/a/3dadf5ab02cb81a5.jpg
9/f/d/9fdd3dbd1e260d3f.jpg
f/b/c/fbce1fb01c921f61.jpg
b/b/d/bbd431195bc627e7.jpg
c/b/6/cb6cee9fa98bfba1.jpg
0/f/c/0fc3cfd5b057018a.jpg
4/a/f/4af8947fef966a08.jpg
7/d/f/7df8cc4b6ae2f3ef.jpg
5/0/b/50b27d7549dbed92.jpg
6/a/4/6a43737809bc62d8.jpg
1/1/6/11693c0f00bb81ef.jpg
c/8/f/c8f4aed90907f266.jpg
a/9/1/a9175c33d839d06e.jpg
7/e/4/7e422b0f3176086d.jpg
8/b/b/8bb351df0289d954.jpg
4/2/9/429b019563325bb0.jpg
a/3/5/a35f32e95625e1cf.jpg
8/4/0/840ecc5d992d5e1c.jpg
1/7/2/172c1c6ab816b3bb.jpg
3/a/b/3ab833de73867302.jpg
5/2/c/52cbfca828a4cdbd.jpg
7/7/3/773739a3a639460c.jpg
9/9/6/9966de4f6bc3f5c0.jpg
d/b/2/db22baddccc6abcb.jpg
b/0/7/b07ef8ae02e11092.jpg
e/0/f/e0ff18e400427fae.jpg
a/6/d/a6d16d4486dbd73d.jpg
6/d/7/6d7064167543bc33.jpg
3/1/c/31c3720ac8743b32.jpg
f/0/2/f028d6c5cdc378ab.jpg
e/c/f/ecf0ab5e8f6da3f2.jpg
a/7/8/a787d29d978ab7c1.jpg
a/1/5/a154c5c1f5d7a667.jpg
b/6/9/b69476900fea7226.jpg
2/0/5/205b6cb0650e3ac3.jpg
b/9/3/b9369de98d672ff8.jpg
f/9/4/f9488cdb472bc0cb.jpg
7/4/8/748c9bbe24924820.jpg
3/7/d/37d2bae34fdde1ca.jpg
6/0/7/60757fdc41d4dcfc.jpg
1/4/6/146812961c7ccfe0.jpg
e/8/d/e8dadf7a783cef90.jpg
d/f/4/df408f07161f9491.jpg
6/8/8/688cdeaa4deecd2a.jpg
f/c/6/fc6325bf635947b7.jpg
d/3/9/d39adc45671cc35e.jpg
6/d/7/6d72ee97eb49a2f1.jpg
4/b/7/4b77dbf50431c644.jpg
9/1/3/9130ddeb48f0eb85.jpg
a/5/a/a5a186adf03509e1.jpg
1/3/6/13646c807047d91f.jpg
7/e/1/7e19349291744513.jpg
b/1/6/b164ea461e04db27.jpg
b/d/f/bdf610d446121502.jpg
e/e/f/eef57811ac364632.jpg
b/d/b/bdbad36b3e8fe176.jpg
d/8/2/d828a05885233ef8.jpg
6/8/2/6823fc1d61f15152.jpg
5/e/5/5e5e87830e5fce7f.jpg
a/6/2/a625341a0e250259.jpg
3/d/4/3d4d5ec4620e9564.jpg
b/c/a/bca78008b401f1ab.jpg
2/9/b/29b93f02b090b442.jpg
4/0/8/4087ed5c8db9bbc1.jpg
0/1/c/01cb6690bd0539fb.jpg
d/c/b/dcb7a295e237ee85.jpg
0/1/e/01e834125ecfb377.jpg
5/0/3/5037bf114aad84bc.jpg
2/0/d/20da1b955a19b8bb.jpg
d/c/d/dcddde097808fc03.jpg
5/1/d/51deac1e2a7232f1.jpg
9/8/b/98b91efb507177b2.jpg
0/4/9/0498204adf66548e.jpg
4/8/2/482161257c6c31d3.jpg
b/9/b/b9b13288b7ba3108.jpg
1/c/2/1c2d577a9a85c72c.jpg
8/7/c/87c2c1a9d5f22ff4.jpg
7/1/b/71b04b69c857fcbe.jpg
4/0/f/40f4a8ff962f06e1.jpg
e/a/d/eadcc08a8ca940e4.jpg
6/b/2/6b2e0dd0f2f05917.jpg
1/7/9/1791437657c66dbc.jpg
5/d/2/5d2fe23d9ea8ec82.jpg
9/8/1/981674845982b2ed.jpg
e/d/e/ede39b3eb2bdfd92.jpg
2/0/a/20a9f4cbcd30b484.jpg
7/f/4/7f4b074e6ff62e97.jpg
4/4/8/4488fafe691848fb.jpg
a/c/d/acd536aba575f43d.jpg
a/f/5/af5a8cf7e1cf3c22.jpg
9/c/b/9cb96468309991cc.jpg
2/2/0/220704dbaa8b6f19.jpg
3/b/4/3b452c2d8eee6fde.jpg
6/9/b/69bd19e7b9959686.jpg
8/f/2/8f2ce18a86958349.jpg
c/8/2/c8269fc2794d7a99.jpg
d/d/9/dd95825d584caf7e.jpg
5/2/e/52e15f4a9abc5f49.jpg
f/2/5/f25e5a4ad7c93eba.jpg
2/f/e/2fed9fcaf1677f7a.jpg
5/6/a/56abde17f312f06f.jpg
4/a/c/4ac8f96c654698e8.jpg
8/b/f/8bf6d266f713959b.jpg
3/d/0/3d0b7ff7f14e4dca.jpg
0/f/c/0fcf6ecdefcf173e.jpg
3/6/f/36f269e3815dc204.jpg
9/7/2/972220554f9638b3.jpg
0/3/a/03ab680ddfb2ad59.jpg
7/8/7/787b74ec1aad2d4e.jpg
d/a/7/da755046446d7bb1.jpg
c/b/1/cb1be33a769e0cbb.jpg
9/b/b/9bb771508b56ec72.jpg
7/c/2/7c2ae6f3e70cfa93.jpg
8/e/f/8ef79a5f9a1618de.jpg
4/c/9/4c97ba98bd9de436.jpg
9/4/a/94adaa785c801c94.jpg
5/f/2/5f2b5a83bfb77924.jpg
5/a/f/5af901635ecc1837.jpg
1/a/7/1a7cb7422611b74d.jpg
9/1/8/9187be331f791f23.jpg
8/1/5/815cbdc0186aa165.jpg
9/0/c/90c06cfe2381edf0.jpg
b/4/e/b4ed3a0146292a2f.jpg
c/1/4/c14ffde95e86a250.jpg
d/c/e/dce5bacbe1883e70.jpg
0/e/c/0ecb8979d875e8b9.jpg
6/e/4/6e419f7283c74c0e.jpg
5/c/b/5cb1c8880d85511a.jpg
3/3/b/33b3924e022fb2f0.jpg
b/e/8/be884a88a630b69b.jpg
8/6/4/864deadc8456cc94.jpg
2/6/8/268a00c5dc7903fe.jpg
d/2/7/d27dcba7c0da1e06.jpg
a/2/2/a223c546395f9542.jpg
d/4/6/d468dc50b6067122.jpg
5/5/6/5567c29eec8ea924.jpg
2/8/9/289f23b0501e1b6e.jpg
5/e/f/5ef901fd9a2cacb4.jpg
7/b/7/7b73accfa64ef64e.jpg
b/9/e/b9e7a38540e03e5a.jpg
0/6/8/0682297e652dc882.jpg
7/d/5/7d51f35ee9003f7c.jpg
f/3/a/f3a787a01beb5c84.jpg
4/e/b/4eb69ac06a645296.jpg
d/f/2/df26ee0a2a608cf8.jpg
8/3/0/83037620cd936a7e.jpg
0/e/4/0e4547fdb2610084.jpg
3/8/1/381a914ab4787de8.jpg
4/d/9/4d9d9ddaaf420dc2.jpg
e/4/9/e4982d709505da3f.jpg
5/9/e/59e1104994fe345d.jpg
9/c/1/9c1d913a11329a91.jpg
f/2/0/f205af4d412ed574.jpg
3/6/2/362e41c1322e5fb0.jpg
3/7/f/37f92c71163e3c21.jpg
c/f/0/cf02ec46e54786a4.jpg
6/6/5/665815d0b7842ea2.jpg
0/6/a/06a00c64c53eff1c.jpg
a/9/9/a995b9bcf67b0714.jpg
8/e/d/8edf54d2114347bb.jpg
1/0/0/100e17176dd7f7df.jpg
f/2/c/f2c734d20c9bf398.jpg
3/a/8/3a8dc1d1885b3f23.jpg
a/2/1/a210ca3cd5b286a7.jpg
7/6/5/76585a02df5eb4b8.jpg
0/1/9/01905aca0edfc555.jpg
2/f/5/2f5db40ff29e81c1.jpg
3/3/1/331680be98994da3.jpg
0/1/e/01ece3dba50516d1.jpg
b/8/f/b8fd79c652660efe.jpg
4/f/b/4fbbe8bcb8240e1c.jpg
a/8/1/a811d97d3343be23.jpg
5/3/5/5351f87cdc448278.jpg
3/d/e/3dee91419ce39f24.jpg
6/5/2/652a2699df42a8c6.jpg
0/a/e/0ae9b0f9c9771cca.jpg
4/7/9/4792d8311af5667b.jpg
8/5/e/85e16123176c6d1e.jpg
2/e/0/2e06f14ed9891922.jpg
1/4/1/1418e0d4f78e0b57.jpg
1/5/a/15adf9d97cdfe020.jpg
0/e/2/0e2044c489d21fb7.jpg
9/2/0/920efde698b98856.jpg
5/1/2/512d8ae1b0007f45.jpg
d/2/f/d2facf7d07dba857.jpg
7/2/6/726c4501fee628ab.jpg
0/2/6/02682885d773944b.jpg
3/1/e/31eeec21757c8df1.jpg
4/5/e/45eca00e6424345f.jpg
a/b/6/ab6b6ef007d03a1e.jpg
1/c/6/1c6a4f9f0047da11.jpg
2/7/8/27803a82f5440b92.jpg
d/2/7/d27c8f1f3ca4824f.jpg
b/3/7/b37318138f286b1d.jpg
4/d/3/4d3bd95afae08b4f.jpg
3/5/b/35b6de1e60ce087b.jpg
5/6/2/562b2074b9956e61.jpg
f/7/5/f75c15ef03fbc6f2.jpg
9/e/6/9e615010751ca80a.jpg
0/2/3/02378ffa9c5dac0e.jpg
5/2/0/520f563428c26a70.jpg
0/9/f/09f03150527944c1.jpg
9/a/d/9ad416f070751d99.jpg
1/8/b/18be4e340d754679.jpg
a/8/c/a8c4937b0eb45f10.jpg
1/a/d/1adad4fbe03c56a8.jpg
9/6/6/9669ca3ba288d9bc.jpg
0/c/a/0ca1152ce7784a07.jpg
c/6/e/c6e35875558faa67.jpg
e/b/8/eb852ce4b60cf964.jpg
a/1/7/a17c33494b0dc956.jpg
b/e/a/beac9ce371b605c9.jpg
4/6/c/46cdac7880f81fc0.jpg
4/4/7/447a1ecda85093ad.jpg
e/0/2/e02673a400c49eba.jpg
6/5/2/65246938831f4430.jpg
d/c/6/dc699c60cb7d6cb5.jpg
e/7/1/e71d02eae7427d79.jpg
e/c/0/ec066732e37e6fa3.jpg
7/8/e/78e3a982a5ad5cfe.jpg
e/d/b/edb50b9a1cd89f46.jpg
c/b/0/cb00da4c5f269d16.jpg
3/4/3/343ba91b56049537.jpg
6/5/5/655bf93e7d9955ab.jpg
e/6/b/e6b8b4c4cc4d7870.jpg
7/8/a/78aa147708c3bbe7.jpg
f/7/f/f7f9ba2a56e95a15.jpg
8/6/4/8640ac69455afcab.jpg
1/0/c/10cd236a0df35ec0.jpg
3/f/a/3fa8908b23ba5fa1.jpg
2/b/5/2b59abb9e23f2828.jpg
2/6/3/263be23d960ff9e7.jpg
c/5/e/c5ef552d599d5482.jpg
5/d/b/5db0248c51ed93e9.jpg
5/2/5/525dec9ab2b29842.jpg
e/6/3/e636604f5cb34418.jpg
4/9/a/49a15cb22cd2b7e3.jpg
e/e/9/ee99d0efd99dfbca.jpg
a/7/1/a71006db5e664d3e.jpg
7/1/3/713722ba48ab0459.jpg
b/e/c/bec218e6fbf8f36c.jpg
1/e/1/1e19c309116e9f03.jpg
2/7/0/2709b3b49879b6ec.jpg
f/b/8/fb886ee11aedba8a.jpg
2/9/0/29052a2536d955f0.jpg
8/b/f/8bf95f203c1acff4.jpg
d/3/c/d3c5a0dde7094ba8.jpg
d/0/0/d00064fda802e729.jpg
5/d/f/5dfcd01ba3f1f3d8.jpg
7/2/1/7211a87cacd044e8.jpg
2/8/2/282febda0e4a9df0.jpg
3/3/9/3392e6b886739b0a.jpg
1/4/6/1469be8864f899ad.jpg
3/5/d/35d892fe9c2949b8.jpg
3/a/2/3a230dc3bac6465c.jpg
3/0/3/303e4a8bde5fc349.jpg
c/9/b/c9bc1f8e8acac2b7.jpg
c/d/2/cd2cf35ed431462c.jpg
2/f/9/2f9c18e9a66b8bae.jpg
d/4/2/d42f5ca6e241a48f.jpg
5/2/0/520497a218708cc7.jpg
0/2/5/0259e800c7574f1f.jpg
a/9/2/a925225b00e33811.jpg
2/5/8/258f54a6c013929c.jpg
3/e/e/3ee28996cf728a13.jpg
3/b/8/3b8baef4eca883ea.jpg
5/6/f/56f0651ab9b04058.jpg
4/9/2/4923746380bad3a7.jpg
b/8/e/b8e260a6a6e0b414.jpg
a/f/3/af3df9d9c38b111a.jpg
8/f/a/8faec292f22caebe.jpg
5/a/e/5ae9589404c89bc9.jpg
0/7/b/07b70c06a94ce9db.jpg
7/0/a/70aa9c995c5e3977.jpg
b/7/9/b799ac349f7de970.jpg
1/e/d/1ed572749c084b4c.jpg
d/e/e/deea69cd110b7cef.jpg
6/6/9/669f436fb43678f4.jpg
4/a/7/4a7babadd28e5d48.jpg
5/6/5/565601e129a6c4cf.jpg
2/f/3/2f3e21f7a861fecf.jpg
d/c/6/dc664f4afc6d8151.jpg
e/c/d/ecd9ba8746397f0e.jpg
2/0/7/207224639663053c.jpg
c/e/9/ce98db9ae9b59356.jpg
8/2/9/829fe0f7d73e75b8.jpg
0/a/3/0a3593e762d43c81.jpg
8/b/7/8b7ec429bbe571ee.jpg
a/a/4/aa4c0d430ec3277e.jpg
7/0/1/701d884e6c99f5ff.jpg
5/6/5/56531c44969c86be.jpg
5/d/f/5df91c245616a09a.jpg
4/b/5/4b599df26b1a5607.jpg
4/e/a/4eab63bfa75f7790.jpg
0/0/c/00c9a8582c695724.jpg
9/8/e/98e765736462547b.jpg
7/2/f/72f4316c52cabdaa.jpg
9/1/0/910437ffcfbeb926.jpg
3/2/3/32342895bee5db5d.jpg
a/5/0/a50d9fa46cdf5937.jpg
6/9/f/69f8bab470ec287f.jpg
a/b/2/ab21b5a4b24de062.jpg
e/c/7/ec7aeb2434375bec.jpg
c/5/2/c5295683b1ee6cb4.jpg
c/d/7/cd7fecdb96bd2abd.jpg
8/3/4/834b728384f6448f.jpg
7/3/3/73319c6bc3946154.jpg
5/5/3/55345109ffee9924.jpg
d/c/8/dc85b31e4a60fcd8.jpg
4/b/8/4b8fcbe67cd102dd.jpg
3/c/6/3c6dc9ba310b175c.jpg
d/b/e/dbeb1753ee9c0bdd.jpg
4/a/0/4a0e442fdfdd32f1.jpg
d/9/b/d9b6cb7a64ec7cfa.jpg
9/9/e/99e94ace56424c86.jpg
7/2/0/720b502b2466eb63.jpg
e/a/e/eae00ba95414f284.jpg
a/e/7/ae7e0cb24e082e7d.jpg
d/d/8/dd8d6cf46e97cb3e.jpg
3/c/0/3c0abbed9f6f00ac.jpg
5/4/c/54cf4cc2df229b35.jpg
c/2/5/c25b2e26cadbb617.jpg
e/7/c/e7c10b525aef2a4c.jpg
9/d/b/9db0f66d419783e6.jpg
1/0/0/10089296e31ff998.jpg
f/b/3/fb3d8d9796124cd6.jpg
0/a/f/0af1d5825abc2378.jpg
8/3/4/834dc6eae6ee227e.jpg
8/5/9/8598857408800845.jpg
0/f/2/0f2161ec64ee5ae0.jpg
8/7/8/8787f8ef8906d09d.jpg
3/7/f/37fbfbe0523d8d04.jpg
3/2/5/32546e27e5fdff1b.jpg
9/8/9/989887832ca80ce0.jpg
4/d/f/4df821826cc8996e.jpg
1/3/2/132f4c6e8106b954.jpg
8/7/e/87e1f1ecf54aed45.jpg
7/5/9/759ff2cf0147515b.jpg
7/3/4/734481f5534ad974.jpg
d/8/a/d8aedc5c9418287c.jpg
5/0/4/5043da7c7de2b35c.jpg
6/3/2/63274512a2fd7ead.jpg
a/f/8/af829e865daf5cab.jpg
d/c/9/dc96496bb541d24e.jpg
2/7/9/279a8ed8ab2160ec.jpg
1/a/0/1a00dd954b77a153.jpg
b/1/4/b14bfad0286c2ae2.jpg
6/e/c/6ec56c4194a25ab3.jpg
5/9/5/59548bdce3d3ee1f.jpg
b/d/8/bd8634347245ebe4.jpg
d/7/c/d7cf81b973938324.jpg
6/e/8/6e83403a8118b75e.jpg
7/8/f/78ffa71d2014aaab.jpg
3/d/c/3dc83285e295d64f.jpg
d/c/5/dc50bf7c75b4c761.jpg
7/c/7/7c7c33136496ef72.jpg
0/1/c/01c7413a8036f8da.jpg
1/7/5/175bad02170f1edc.jpg
7/e/d/7edb9505699adbb8.jpg
2/3/5/235df905231b3003.jpg
1/2/8/128efb865c313321.jpg
a/4/7/a4775fa3f641212c.jpg
2/1/b/21bd61ee7bde4f0f.jpg
8/5/2/852a0db1af4123f6.jpg
b/2/f/b2f29cb292bd2ab2.jpg
0/3/6/036fa67d29d5dafe.jpg
5/6/e/56e602a383fa6e77.jpg
1/9/e/19efd95d527d6fb5.jpg
7/5/2/7526d58da394d490.jpg
2/c/2/2c285414070bb11b.jpg
d/3/1/d3116dfeb3adb4dc.jpg
e/c/0/ec00247f01a2406a.jpg
3/8/d/38d56bbd55eda007.jpg
0/7/6/076633835e521026.jpg
a/5/8/a581d6b39648667d.jpg
6/8/4/6848d44d8e1f1929.jpg
b/d/c/bdc39abb3bac833c.jpg
f/b/9/fb93c9541022a0c0.jpg
b/8/c/b8cbacaac61c4c87.jpg
7/b/7/7b71bd1639c9f778.jpg
1/2/a/12aeaa93600cdf79.jpg
9/8/5/985136e26adabb50.jpg
e/d/f/edf333cb5af21e61.jpg
2/4/1/24124c65d74a926e.jpg
7/f/3/7f3447666590a46e.jpg
6/3/b/63b0a3bad3393602.jpg
9/f/2/9f267beeae6b0e8a.jpg
0/0/4/004b03d4fdf10461.jpg
e/1/8/e186bd68d3c988dd.jpg
b/7/6/b7602492bac993ad.jpg
1/7/1/17162a77615f0ed9.jpg
6/4/b/64bc88f7989abe04.jpg
e/2/e/e2eb091ea02abc66.jpg
5/8/9/589ff724a256374f.jpg
8/2/b/82b7164687fe9ca8.jpg
9/8/4/9841b0f21306958d.jpg
6/b/b/6bbf5bb1bc22423b.jpg
2/3/4/234e468effb073a9.jpg
1/f/c/1fc48d9a4f359ef3.jpg
f/6/d/f6ddb63d035e2453.jpg
c/0/6/c064a5fbc4a4077f.jpg
3/e/4/3e49a47632abd46a.jpg
8/9/8/8981db0a3a7c4091.jpg
4/b/6/4b618de47a3cdde0.jpg
a/1/0/a10b8b6e0ae71567.jpg
2/e/8/2e8ad75b943426e3.jpg
4/d/f/4df9a18720d077a5.jpg
8/b/3/8b3c506a2769f3ff.jpg
3/5/5/355cad091d98cab8.jpg
e/3/9/e394059c211aa26c.jpg
5/9/0/5904fc89f5d90a1f.jpg
4/6/9/46992965dc11bda9.jpg
b/3/2/b32f64c93d66e2be.jpg
4/d/6/4d65b7b7933fd717.jpg
8/8/e/88e84829af0ad450.jpg
1/3/9/1398660101ccc914.jpg
7/f/e/7fee13e713a0629e.jpg
d/3/d/d3d79ee14deae606.jpg
e/8/7/e871ad245780db15.jpg
9/7/2/972108c051e0bc25.jpg
9/7/6/9768494ca32fdb60.jpg
a/e/5/ae5bccaf58d7aad6.jpg
1/d/3/1d34930cb6435332.jpg
8/a/8/8a81f08d015a5611.jpg
7/3/7/7373b7555b397e13.jpg
3/e/4/3e45fa8e903314fe.jpg
b/0/b/b0b8952aeb3584ff.jpg
d/e/5/de5febaca921f96c.jpg
5/c/e/5ce6796872018d94.jpg
f/b/a/fba8229136c32d9d.jpg
3/5/5/355ca11326ad2049.jpg
e/3/a/e3a7bd50b7aa3fe9.jpg
b/4/5/b45107585f40c695.jpg
9/d/e/9deed1ab72ca4cd0.jpg
c/1/a/c1abd4ce6562d44e.jpg
6/7/4/674f722ca331adc5.jpg
d/0/8/d08bca3244c0f147.jpg
5/3/8/538064a1b4c02cac.jpg
a/0/d/a0dccb3c24078a38.jpg
b/0/5/b050a219a273b1cb.jpg
3/a/0/3a0028ac8d5a84b0.jpg
e/1/6/e163d97c3bcd901c.jpg
6/1/6/616cd5f3ed946188.jpg
2/e/e/2ee98b93e05b4fc0.jpg
b/8/f/b8f75dd853579d21.jpg
c/8/8/c8873476c5911604.jpg
9/3/6/936b46eefa748924.jpg
0/d/6/0d6929868e2ffe93.jpg
a/f/8/af8ef57d3ac23d06.jpg
f/0/1/f019133371a80cf9.jpg
7/b/1/7b149d49ea8b279e.jpg
a/3/1/a31a2c32e536ef12.jpg
c/8/d/c8d7d1d8144ccb12.jpg
c/6/e/c6ea69b846039fbf.jpg
b/4/1/b414ccc904d6d6f2.jpg
8/b/8/8b899d11f4bbbfcd.jpg
6/6/8/6681669229afc32d.jpg
f/c/e/fcec619fab1bf86d.jpg
a/7/1/a71945ecf468ca75.jpg
2/7/b/27b17fc68f47f380.jpg
0/b/0/0b0ac5cca4199fac.jpg
a/0/6/a06fdee7dd7f5da7.jpg
5/9/1/591918b4a6fe8d95.jpg
2/a/8/2a86154cf2c0e7a7.jpg
d/1/8/d182ecaa3f9fe5ae.jpg
7/1/0/710e98520c3c8feb.jpg
9/c/8/9c8c921d190ce698.jpg
0/a/3/0a38c5e550f66d5f.jpg
d/9/a/d9ae8776602ec914.jpg
b/9/3/b9388acf9ac1ea73.jpg
e/6/a/e6ac1d9c8e8d4367.jpg
1/d/2/1d2c5a13ff135866.jpg
0/4/4/044884465425a5c7.jpg
3/0/7/307416500bf5b118.jpg
2/5/9/25986c02311f0c7b.jpg
a/f/5/af563145496abe8e.jpg
4/5/e/45ed66066f56a2cb.jpg
5/1/3/5132ecb3aaa3d31a.jpg
3/2/6/3267a41882e2034b.jpg
0/4/b/04b3d18179a10410.jpg
8/8/b/88b9583ccc924348.jpg
1/1/9/11921e634603ddd0.jpg
0/0/1/001a11b0f23cd664.jpg
f/7/2/f72a52b33556270f.jpg
8/b/7/8b707a5e0b9977b6.jpg
4/6/2/462ebebe7be6e598.jpg
1/c/b/1cbdab92d3c8d3c9.jpg
9/d/d/9ddf64d44720baae.jpg
3/8/d/38d1bec992ac403e.jpg
e/3/7/e372e7a96e0a0832.jpg
9/c/2/9c2486ff94b7c275.jpg
4/2/b/42bb2b551e9bf892.jpg
a/c/a/acaefb2102da361c.jpg
4/2/0/4207c28fb6901151.jpg
a/9/3/a93782f9310c83d8.jpg
1/2/6/1262338b62dcc597.jpg
5/3/0/530151a00f09a10b.jpg
7/7/0/77060f8cc4f4ed51.jpg
8/2/2/82259d98bd8606e7.jpg
e/4/0/e40074496501cf9e.jpg
a/5/3/a532e822458b50da.jpg
6/6/d/66dd01b31a6d1dde.jpg
a/3/0/a30acec2eb7b2474.jpg
7/7/f/77f75f53ff1faaf0.jpg
1/f/4/1f450aca36090e49.jpg
8/2/3/823e22d87b389106.jpg
a/a/1/aa1f126df8bffc9d.jpg
e/d/e/edede646b9091316.jpg
2/c/0/2c089dd87c3f43b0.jpg
6/e/f/6efa2fcbc16c9d9c.jpg
9/2/5/925523afe77c64c5.jpg
9/b/2/9b2a972b055fb571.jpg
4/c/a/4ca7e08fd1aeb437.jpg
6/2/8/628275369ca1e964.jpg
e/3/d/e3d2c39a39916f7a.jpg
a/f/3/af3922674110813d.jpg
2/e/f/2efaa3abee4f9460.jpg
5/3/f/53f2bed43daa2863.jpg
0/4/1/0411536f58d5b96e.jpg
6/4/4/644ea725f9804afd.jpg
f/e/5/fe52d8fe3010cc33.jpg
5/0/c/50c500d7049d298f.jpg
c/1/5/c1583ef1362a7143.jpg
f/7/f/f7f8c7929e195045.jpg
b/c/8/bc8c2a7c4eaae541.jpg
4/2/f/42fe4ac326cddaa7.jpg
d/d/f/ddf25e5b9411fcbe.jpg
c/5/e/c5e21fa7319d5c79.jpg
b/0/f/b0f305810851f7b8.jpg
b/7/3/b73d3cf82272f478.jpg
b/3/4/b3420de290bc36d0.jpg
a/9/2/a923b6171c3c3a1d.jpg
7/2/3/723647928ae1ddfa.jpg
0/a/e/0ae835da7b1ac1ba.jpg
8/e/2/8e243667b5134528.jpg
3/1/4/3141f4d840a71a41.jpg
7/3/a/73a4f07341fdadc7.jpg
1/7/f/17fec8c104d87684.jpg
4/8/8/4884736c375b2dec.jpg
d/4/1/d4192619fccdbbad.jpg
5/f/b/5fb13e0d42bbd6ae.jpg
0/e/5/0e551458fee21e28.jpg
7/b/3/7b32133bb40bbaa7.jpg
1/4/a/14a1006d6edc3489.jpg
a/b/3/ab398baaa301af89.jpg
7/3/d/73dccf4c9bcf6d5a.jpg
9/8/6/986d7449adfb8cea.jpg
b/7/3/b732da7d3355a8a1.jpg
8/8/a/88a7536e4f910ab3.jpg
c/9/6/c963215ef0ecd30a.jpg
7/0/8/70820f0b77a67dee.jpg
5/5/8/558caa2d00a2e9c7.jpg
d/5/1/d51dc7c8f93c42ab.jpg
6/b/b/6bbf2b1018e1f40a.jpg
5/2/f/52fd89c11059a9d9.jpg
a/e/a/aea0506048437936.jpg
c/f/3/cf3025e66487e672.jpg
3/8/9/3894c5fe7ea69e08.jpg
c/2/8/c288bab2d1af3d0f.jpg
c/0/5/c05b955ade2d2992.jpg
f/3/7/f376049a988f611d.jpg
2/6/f/26f0be0a6b4704dd.jpg
9/d/a/9da53e3a416e8f40.jpg
6/3/1/631d780a62927ff4.jpg
0/b/e/0bed7d8d6cd37e63.jpg
9/2/0/9202b1dcbb87aecf.jpg
d/8/7/d8742b04c256e22d.jpg
5/5/c/55ceba2f6989d292.jpg
b/0/5/b057378244564b78.jpg
2/a/5/2a509ac0ed55623a.jpg
a/5/5/a551bf9c150c50b6.jpg
8/1/a/81a7fb695f12ec8b.jpg
1/6/b/16b078f6c348505e.jpg
4/c/c/4ccb5f00cb99e4e6.jpg
c/b/0/cb0b8c5721cc3d22.jpg
8/3/0/830ffddace4eef91.jpg
3/0/f/30fbd9340c1e620e.jpg
0/c/b/0cb8f33ad3a2f9ad.jpg
9/d/a/9da209048352878e.jpg
e/8/d/e8d25230e26fb060.jpg
2/a/7/2a7fc6462ad56579.jpg
1/1/d/11debe1302f01bbd.jpg
a/9/5/a95c71c55a59016a.jpg
7/1/c/71c7954221e585c6.jpg
2/c/4/2c4258e8f47e125e.jpg
4/a/d/4ad2aa890f875421.jpg
7/a/0/7a07dfbb0059d57c.jpg
e/f/6/ef60f201886e95dd.jpg
d/c/0/dc0ccd48d80d8858.jpg
f/7/7/f77c7daa688d9692.jpg
6/3/5/6358153c9d664e99.jpg
c/1/9/c193e5e9e991e641.jpg
5/7/9/5793d6710a3895d3.jpg
f/d/2/fd298c5ec7cbb483.jpg
d/8/9/d89f8fe8573809a0.jpg
c/e/9/ce9c5b91c20c9b26.jpg
9/6/3/963604c51d849fde.jpg
5/3/2/5321b771ca12986d.jpg
6/6/b/66b1b002acd38381.jpg
b/0/5/b05ccd19dba8bc5e.jpg
1/a/a/1aaac1459f1b556b.jpg
5/c/a/5cabc5102b63e54b.jpg
3/1/4/31403a050a7e1232.jpg
6/a/4/6a4ac0a52ce6db4e.jpg
9/a/e/9aeaca4a87f22bf5.jpg
6/5/8/6584394dbdaa6b30.jpg
d/1/f/d1f20ed2a8976307.jpg
c/5/6/c56324565b2a99f0.jpg
f/4/0/f40ba9a8c24e60f9.jpg
b/b/c/bbc17759656e05bd.jpg
6/a/2/6a2ccfa991643b6a.jpg
b/9/e/b9e9086e4f4ba3ab.jpg
8/9/0/8906276118a5c6ba.jpg
b/4/0/b40c17324a11be40.jpg
3/f/5/3f5b48889bd4a503.jpg
5/d/9/5d9d006df0237fa7.jpg
c/c/d/ccd45db8a25266ac.jpg
2/f/6/2f6013459b1c180c.jpg
4/6/b/46bfa7f4241aeb71.jpg
2/8/e/28e66089af155675.jpg
d/a/d/dad3c0b16c747a99.jpg
b/f/d/bfd82cd71354b5e5.jpg
2/e/7/2e715ae71c7a9a7b.jpg
a/f/d/afd895bfac390a0a.jpg
7/7/f/77fcebb6d5907d19.jpg
9/1/4/9148b5e0a28aa634.jpg
d/6/0/d60dc9d3b1d41a75.jpg
2/5/b/25b4bbd8b012ecbf.jpg
7/2/4/724d5d7e24f358db.jpg
3/4/3/343c42779955afc6.jpg
8/b/c/8bcec6d3ef6cbfc6.jpg
7/7/2/7726004d64ed8697.jpg
a/2/6/a26a6ae63c49be1c.jpg
8/1/a/81a134832bc8732a.jpg
c/2/3/c23432d3564acaab.jpg
2/e/1/2e1fd1272f599eb7.jpg
e/2/6/e26fc31cb974a95f.jpg
f/1/5/f157727719c2acac.jpg
4/6/1/4613613bef434765.jpg
1/4/e/14e6837f9691170c.jpg
a/b/0/ab027326c2727e9d.jpg
f/d/d/fddb89e66de51f72.jpg
a/3/6/a36cecafe2408af2.jpg
f/b/7/fb7c25129835babe.jpg
2/4/7/2474e67d16e9e076.jpg
3/e/9/3e92cae98403efa0.jpg
a/d/4/ad4d3f5188ebf100.jpg
3/9/1/391ddfa53f8aead2.jpg
6/c/b/6cb161ddc7f40817.jpg
0/d/3/0d38436982bda516.jpg
4/f/e/4feda517b895acb4.jpg
a/3/1/a31f2a041fa8bff1.jpg
a/5/6/a56847ea2a476d8d.jpg
5/d/1/5d19e1a38c4ba89c.jpg
6/b/2/6b2809c7af520b9b.jpg
c/a/1/ca17fb4d8b2bf5ff.jpg
8/f/0/8f0293b1cca9312d.jpg
f/9/d/f9dcee8c3a3e0b2f.jpg
a/5/3/a532ec1c44dd2ca7.jpg
4/1/0/410af80f29722457.jpg
1/c/b/1cb15a531674c4fb.jpg
1/9/4/194ac4696771e98b.jpg
8/b/c/8bc49fbcd614e7d5.jpg
3/8/1/381701fc1edfce26.jpg
7/0/3/703bad0fc9c66f04.jpg
f/5/5/f559d96c50ebce97.jpg
9/4/9/9490d954c974b071.jpg
2/9/9/299b322f140d16e7.jpg
e/9/f/e9fa60c26427cc2a.jpg
b/b/6/bb6f27eefed7e3f8.jpg
c/2/1/c216bea09d6c9890.jpg
a/f/d/afd7021c0f8be820.jpg
e/3/9/e391a4a86a3e9e70.jpg
0/8/a/08a14e77cd65ba3d.jpg
8/3/9/8392260df9931b42.jpg
a/9/1/a91d862f42b1ab76.jpg
2/b/0/2b089b88e56d022f.jpg
c/d/1/cd1d44fe4bac219a.jpg
0/6/8/0688cc43463105da.jpg
6/f/0/6f031e88f13e01bd.jpg
8/5/a/85ab1a64000022b0.jpg
3/2/1/321f99fd250544a0.jpg
b/4/3/b438623cd493f854.jpg
6/0/e/60e9156c70e494a4.jpg
8/0/9/80996bad2bfa12aa.jpg
6/f/b/6fbed8a461e0e6b7.jpg
b/d/a/bdadb51a57e5f55d.jpg
1/7/0/1709f06df16244de.jpg
d/0/0/d000eb90273dd2e4.jpg
3/5/b/35bf7b10f249bfac.jpg
d/8/d/d8d83878caf89df4.jpg
a/8/c/a8c7a5e11455f538.jpg
7/d/0/7d0319e385327bac.jpg
5/c/7/5c7d25d1ba8a76b8.jpg
0/a/b/0ab7ff6408e3fd1e.jpg
5/9/a/59a074c9c08f4105.jpg
e/d/c/edc3f7c9fa6f5690.jpg
2/7/b/27b1809c0e33cfbf.jpg
a/0/f/a0f9c4fb95b8e5d9.jpg
f/2/5/f25f1a086d4756f3.jpg
b/0/7/b07ff9c1b3598a4a.jpg
0/3/0/0309fba36fc670d4.jpg
c/b/b/cbb0f62e78021a6d.jpg
f/9/3/f9341a67f16375b2.jpg
9/4/6/946c88133d4b9bae.jpg
0/9/4/094001f0368399f9.jpg
d/e/c/decbe821b5906153.jpg
c/b/5/cb5f5a61dca40c68.jpg
7/3/e/73ead2753d86f706.jpg
d/0/f/d0fb3974e1583612.jpg
4/3/8/4387c4474cb7e5ad.jpg
5/9/a/59a7483fddae2983.jpg
7/f/c/7fcd885640119ae0.jpg
6/7/5/675e2649ba4ee43b.jpg
2/f/b/2fbcc7e96bfdc8d3.jpg
0/b/a/0baa35b6928ae50d.jpg
3/a/7/3a74c778ce49af7e.jpg
e/9/0/e903b7d81bcc81f3.jpg
0/9/4/0948d80a27e17c7d.jpg
d/2/d/d2d9135cd45e31c8.jpg
0/c/3/0c3b68a94bfd029b.jpg
4/c/5/4c5080d6c9bbf473.jpg
b/a/4/ba48801913cc7c73.jpg
d/4/0/d40718ad69ff0b1c.jpg
a/f/9/af99fb05fbdb1ec1.jpg
3/c/9/3c941daa9468474f.jpg
8/8/3/883ba51d7161749c.jpg
e/2/a/e2a66f8fe1a486ee.jpg
3/c/d/3cd2557459d5b209.jpg
b/2/4/b249b8e156793eaa.jpg
1/0/9/1095da86eb8dc13c.jpg
1/5/8/15826ef19d40f06f.jpg
1/7/b/17bb4a4dbd629665.jpg
6/2/a/62ac5912b7a0fe89.jpg
0/c/2/0c216f622d4fcb0b.jpg
8/e/8/8e84ee0d87744c9a.jpg
4/9/f/49fe0429aa1b8813.jpg
a/1/4/a14dcfd5d08ef439.jpg
d/8/2/d82643c393b0155a.jpg
8/d/4/8d406efbd71b1e75.jpg
2/f/4/2f4e91677aab12d7.jpg
a/5/5/a55f269770c92bd5.jpg
1/d/e/1de748f09defc306.jpg
d/0/4/d04a44e2109a06bd.jpg
3/4/1/341de8e748470695.jpg
e/d/3/ed33ffade5a865cc.jpg
6/0/b/60b046c1d192863c.jpg
4/f/a/4fa4fd4d1b49bad9.jpg
c/0/f/c0f050579c708352.jpg
4/5/3/45378dedc0b5dcce.jpg
b/4/d/b4d22579b66ea314.jpg
a/5/3/a5378d71e9573143.jpg
2/f/c/2fcb824d6884f4be.jpg
5/6/a/56aaa4f2ea33ab89.jpg
1/d/0/1d0762ec531bdbeb.jpg
f/b/3/fb3189cec548b64b.jpg
a/c/c/acc111e8c4a06f64.jpg
b/a/2/ba2a5d2cc1a55a2a.jpg
b/f/2/bf2531e86df11cbf.jpg
a/6/1/a614d0eff82edf84.jpg
1/e/7/1e75874f7e87896b.jpg
9/a/f/9af4926a15baac50.jpg
7/9/1/79132aed3bbf857e.jpg
b/3/7/b3710402264c4589.jpg
a/6/a/a6a62b7f27a5a400.jpg
a/a/f/aaf9f8663a36eeff.jpg
e/2/8/e28e71e0b382b80e.jpg
2/3/0/2308d7e541a2fe40.jpg
4/7/a/47a35c94e56503cd.jpg
6/4/3/64374520745fc034.jpg
6/a/4/6a4b253597c0bc68.jpg
e/7/d/e7da00ccb4c396ef.jpg
b/5/e/b5e0cc86f7314c42.jpg
9/c/f/9cf10b275559af69.jpg
a/2/0/a20cb46891ee91d3.jpg
c/3/4/c34d2a7b9cc07c5c.jpg
0/e/c/0ec48a7c5b7adcf2.jpg
c/9/1/c9111e56205f173f.jpg
3/5/0/350a44b130e6dc00.jpg
5/c/0/5c0bf59bc7b72a0f.jpg
4/a/2/4a2e53bcb00e4647.jpg
4/b/d/4bdcbb70faf5bbaf.jpg
d/2/5/d25b61b8fcb1859f.jpg
a/4/e/a4e2713c601a2d64.jpg
2/0/e/20e6dfac073da938.jpg
7/8/7/787c4ba095129d35.jpg
6/c/2/6c2592aa2cd60fe1.jpg
d/2/4/d24b7260a55ff84c.jpg
3/7/c/37cc43d51324d876.jpg
9/6/4/9644d5d4be2cd498.jpg
d/3/f/d3f7d4410e34927a.jpg
2/7/9/279c353dc9c4d1dd.jpg
6/4/2/64220f35c1f2df57.jpg
a/4/e/a4eba2343b842bee.jpg
3/2/a/32ab076ec50e93a4.jpg
e/e/0/ee0c419c527ff38b.jpg
4/1/e/41e6f20ef5678773.jpg
e/c/6/ec60eb383f0602db.jpg
d/4/0/d40e2a2240fafb60.jpg
1/2/d/12d208b21c54a905.jpg
6/9/d/69d2a7af9eb38b90.jpg
8/f/d/8fd1a6f4ac53240d.jpg
c/8/9/c8997ce8768b4012.jpg
c/4/f/c4f3987a80031a52.jpg
2/5/4/25442b585f3ee65a.jpg
8/d/5/8d50696399f692d6.jpg
0/3/3/033ba56fbe748334.jpg
c/3/0/c30496d7ce885018.jpg
e/5/7/e571f54d1fb229f6.jpg
0/5/7/057899572e2a775c.jpg
c/8/4/c844dc66a2222c56.jpg
9/0/e/90e6417b43a510c2.jpg
6/b/4/6b44d6f6f1929b1b.jpg
0/5/e/05e7824ed55abdc2.jpg
1/a/0/1a050df6a42a4abd.jpg
0/1/9/019b11b5d3ff5401.jpg
1/1/8/1187d183d8f5df0f.jpg
7/7/6/776ff84be8dcaa83.jpg
f/0/e/f0e3299ad0d1be65.jpg
8/b/f/8bfb569288b417bf.jpg
a/6/3/a630f73b973e0c9f.jpg
b/d/6/bd671fa1656f046e.jpg
a/8/0/a803a0da2be8c602.jpg
8/9/2/8924aa0a4b92c239.jpg
7/7/2/7727f86444bee596.jpg
8/5/4/85424115e217c503.jpg
3/f/c/3fc804c6efed18c2.jpg
4/8/b/48bb8230062796e2.jpg
0/a/2/0a2b0d774e135729.jpg
0/8/b/08b458f768b28b19.jpg
7/3/c/73c9013a27c09fd7.jpg
0/2/6/026ccb8310e2447f.jpg
4/9/0/4909638ca32d857a.jpg
c/d/0/cd0d0d73cbedfaf4.jpg
1/6/8/1681b3e2ae4006f4.jpg
f/f/a/ffa56b9ead059a80.jpg
0/4/c/04cda49e409554cb.jpg
e/e/1/ee192e5554961f7f.jpg
9/4/5/9453002ec899227c.jpg
1/7/8/178c01e0dca098c3.jpg
7/9/e/79e0e975217e5f86.jpg
4/b/5/4b56d87516bba16a.jpg
e/4/c/e4c14de602c6dc7e.jpg
4/3/8/438df78d8dc6b42f.jpg
6/0/0/600fade33def4385.jpg
8/7/2/872dc918672c5853.jpg
c/7/3/c73efaac5ff8b350.jpg
8/1/e/81e1eed45b1cc3aa.jpg
9/a/a/9aa98f5149a09d1c.jpg
b/5/0/b5065a74bb1d255a.jpg
e/0/c/e0ca6c35f5cb7b8c.jpg
d/b/3/db31e742116111c3.jpg
d/d/2/dd242a40b780a03e.jpg
c/0/5/c05106a646d3ba17.jpg
3/a/b/3abbb915811d2fe7.jpg
a/3/1/a31602d966ac6391.jpg
d/8/3/d83948c32344afcf.jpg
7/4/6/74621f55d8c0b678.jpg
5/e/7/5e740ce6de28acda.jpg
4/b/6/4b658462cd6d23e1.jpg
8/4/e/84e0eae470a8d064.jpg
d/c/6/dc67fce79e6337a2.jpg
f/e/f/fef9e09a3bc9e54b.jpg
f/f/4/ff46ddd5a206d012.jpg
c/0/6/c068cd47b342df04.jpg
f/c/f/fcf0a62a98976cb9.jpg
d/1/d/d1d392d462822eea.jpg
e/a/f/eaf6ab471b3d7257.jpg
d/7/3/d734f2e8c456ce83.jpg
f/f/a/ffad8251efa7061c.jpg
f/3/a/f3a06c70f5d6aa80.jpg
0/4/5/045ac2deb169fe7a.jpg
9/1/2/912743ee2682042a.jpg
e/6/a/e6ab861f0518cef8.jpg
4/4/5/44517a0e6fcf1de1.jpg
4/e/7/4e7b31b2e60db3bc.jpg
a/e/9/ae937b916c45c12e.jpg
e/8/c/e8c5fa0f80d1ff3d.jpg
7/d/c/7dcf72f7ae97bf27.jpg
9/2/1/921b78d1fed9ac25.jpg
8/f/8/8f8a97d905e037c6.jpg
2/9/c/29cf2e4f269e787e.jpg
0/1/5/015fb3de8992b2f3.jpg
1/2/7/127534f71acac535.jpg
e/4/1/e417f06a18dcf957.jpg
1/5/2/152caa3656729460.jpg
9/3/4/934345fba1a5622c.jpg
7/b/1/7b1d28d932c8565e.jpg
0/8/5/085ca609a92d13cb.jpg
e/6/8/e6848049d793a974.jpg
b/e/9/be9334669f4a42d4.jpg
b/a/a/baafbeebcf96a288.jpg
a/9/3/a933d63c672efc5f.jpg
0/1/8/01881f0f739ec53c.jpg
e/7/5/e756f48efd35241f.jpg
e/4/a/e4a2ed7daa17954d.jpg
6/4/3/6435d2dcec35cbc3.jpg
c/5/0/c5016bbf473bfb05.jpg
1/c/e/1ce0b80490bdc1aa.jpg
b/1/2/b125ba1535cfc0e0.jpg
0/5/5/05588f257ba258dd.jpg
5/8/c/58c141e8ba4e99c4.jpg
f/8/4/f840abaf0b2a29fe.jpg
d/a/a/daa7131090d283ab.jpg
c/2/5/c25fef32c37e4386.jpg
9/7/5/975f9f083aa7de9f.jpg
d/5/6/d56fe71963cf9632.jpg
1/0/8/10881257a4ecd47c.jpg
c/b/5/cb563f7c5c912670.jpg
4/3/d/43d0679fe2393264.jpg
a/4/2/a42e6d1fdfdd150a.jpg
2/e/4/2e4ce549700e7cf1.jpg
c/5/a/c5a05e2cdb6539e9.jpg
1/6/d/16dcef3f2daa898b.jpg
8/f/f/8ff59979c00ee596.jpg
3/4/7/34729d648af36f13.jpg
5/1/8/518ce5bffc0447f9.jpg
0/b/3/0b35dd9837c4534b.jpg
c/f/c/cfcaf2df4e98a200.jpg
6/6/3/663c3b2e94923444.jpg
4/6/f/46fef255f3d92641.jpg
0/0/1/001b16301ac67f41.jpg
5/5/d/55db96b9e0917757.jpg
1/b/a/1ba0dc5a70d2eb8a.jpg
4/0/9/4091f888397100c5.jpg
a/5/3/a53cabf07f63c802.jpg
9/1/b/91b2e87f6041348a.jpg
7/6/2/762d260cae348b64.jpg
1/1/3/11302edc631bad45.jpg
f/6/f/f6f38856af11573b.jpg
3/9/6/396203f377814580.jpg
e/e/5/ee5c2b009d0c4f0e.jpg
3/d/b/3db93977552cfa41.jpg
3/3/b/33b77e5421fa182d.jpg
4/b/2/4b2e44432871619e.jpg
9/8/9/98914cf4e4d4b219.jpg
7/f/0/7f0ad448e91a60bf.jpg
f/e/c/fec9ed3266e543c4.jpg
0/c/8/0c861d2fedb554e8.jpg
e/c/7/ec7594a669523f2e.jpg
a/4/b/a4bf7533e03e3471.jpg
5/d/8/5d8603f0026d5a6a.jpg
b/2/0/b20565cdbbfff0ed.jpg
3/5/3/3537c7b94b5d726d.jpg
4/5/6/4562e39a5a5ac878.jpg
9/2/3/923352422304ee81.jpg
d/1/6/d16f93d11d625a3e.jpg
5/e/4/5e476726280358f8.jpg
f/b/1/fb154e82eb91cd13.jpg
6/2/b/62bec31e63af5072.jpg
0/4/1/04130ac7d467802f.jpg
4/c/2/4c2afa589467d52f.jpg
0/d/4/0d44c0b7cc3e572f.jpg
5/c/3/5c3983f333c2d17b.jpg
4/4/a/44aa85f269dc93c4.jpg
4/8/7/487c482f351c04b0.jpg
2/c/0/2c0b96b803c032e4.jpg
2/e/5/2e5634e20a171169.jpg
e/5/6/e56b5e98826c1b86.jpg
c/d/a/cda6c230ef9880a9.jpg
6/2/7/6275dcd56578fa58.jpg
7/a/6/7a6640c45b3fcaa1.jpg
9/7/c/97ce1e7b031dec0d.jpg
6/b/1/6b1d8427d5e15905.jpg
c/2/7/c276284146799338.jpg
c/3/6/c364ba802363bcd2.jpg
3/7/6/37635f4efa103844.jpg
5/a/7/5a72b0541f7457ae.jpg
f/8/6/f8609dead79bd5d5.jpg
5/8/f/58f352e52343db9c.jpg
a/0/7/a074e138af0704fd.jpg
3/5/1/3512b888235434a0.jpg
8/b/9/8b91d12d067ddb4a.jpg
9/4/4/9449bbc54fa7b0dd.jpg
2/d/a/2dad8f77ff331f61.jpg
1/d/d/1ddb1c0e2f25154f.jpg
f/d/1/fd1290dd03fa898a.jpg
c/a/5/ca5d10b291d52c05.jpg
3/6/f/36fde89a8a450645.jpg
2/6/d/26d151a9b1d79d83.jpg
a/3/9/a39be802441b6d15.jpg
7/3/6/7361407413e6b078.jpg
3/d/0/3d0d33daecfd04b3.jpg
c/b/6/cb605f7f7315daaa.jpg
3/e/b/3eb7ad2eb73ce2f2.jpg
a/0/4/a04ae4ed70e03384.jpg
4/4/4/4447cf7f5a969c70.jpg
a/7/f/a7f4e89a8c6e3f8c.jpg
b/a/7/ba706ebfca7f074d.jpg
4/5/4/454d3dcfa827367d.jpg
a/6/5/a6520546b080d0d2.jpg
d/4/7/d47b0cbf1ee8f9cd.jpg
c/6/6/c6694a4ab80a1b38.jpg
0/d/5/0d511f477542de61.jpg
f/2/e/f2eddab5a4e5add2.jpg
6/7/8/6782f71e9b67ba9b.jpg
b/9/8/b9890cc6441946f4.jpg
7/a/1/7a1fa9f28075f9f4.jpg
3/1/1/3115a4a00c5fc7b3.jpg
f/e/4/fe4f3081a845d59c.jpg
5/6/5/565ceacd18d76cf5.jpg
6/7/9/679c2bb3d56e0937.jpg
e/9/2/e9225c8b6d203db4.jpg
2/5/7/2578dfcb5e877879.jpg
e/7/4/e744568784d0e8c2.jpg
9/7/a/97ac5cc5b0ede11e.jpg
d/a/9/da9bc90950f1b158.jpg
c/f/f/cff593a36a2f5622.jpg
5/e/6/5e6006bd7857d7ac.jpg
0/8/9/089e2f3cd783c5a5.jpg
1/8/a/18a6a5d3b295b72a.jpg
8/0/6/806ba19258ced2a9.jpg
8/3/b/83b3c7ca98a64803.jpg
0/2/e/02ee79a3e0770ab5.jpg
c/6/b/c6bffa4711f3091d.jpg
f/d/7/fd744f80800c71b7.jpg
f/1/8/f18614c3d53d0307.jpg
3/e/f/3ef2325e9d07642a.jpg
8/2/c/82ccd38f1b7346f8.jpg
a/8/f/a8fca86e8b1a8129.jpg
2/f/d/2fd44ab793aa92db.jpg
7/b/9/7b933db1d8527980.jpg
6/d/4/6d47f070efd761b8.jpg
9/6/a/96ac51648ba5ab99.jpg
d/2/8/d2809b537c9005ad.jpg
3/b/6/3b676f14e9a1a61b.jpg
8/a/1/8a1003f36ecd3e44.jpg
4/1/8/418b2061c6a8e2da.jpg
f/2/1/f2154f23ac774129.jpg
a/c/2/ac25807cb60de77c.jpg
6/3/4/634040211be52875.jpg
e/a/b/eab5fe738478afc9.jpg
b/6/0/b60a03a1d438e299.jpg
4/2/4/424ddf939398329b.jpg
9/d/0/9d0144c55cb19e80.jpg
e/d/d/eddd1a7b490343c4.jpg
d/d/0/dd02586e1645a597.jpg
a/5/7/a57b6b2d40d8e6de.jpg
9/f/2/9f2aeaf5bbaf6056.jpg
9/1/b/91b98c56f1e4fbda.jpg
8/2/2/8224fb35aefe62cc.jpg
9/2/7/927966a00e70ee96.jpg
0/3/0/0308706d4d538652.jpg
0/7/0/07059820cb846f18.jpg
1/3/8/138cd0d372138ec8.jpg
7/d/a/7daab60ed5db0c82.jpg
7/9/0/790845ab17eed4d9.jpg
e/3/5/e35bb191282db0f3.jpg
1/e/6/1e6d16a715ea669d.jpg
b/3/9/b39064b2b0ba9128.jpg
3/c/6/3c6752244a5350a5.jpg
1/8/4/18462538e34bcf89.jpg
c/8/2/c8253007f64040f8.jpg
6/d/6/6d6a8a90130d6e06.jpg
2/e/8/2e89302d760deee2.jpg
6/2/a/62a21b7e98f857a3.jpg
2/0/5/205ba7c6b40a6c3e.jpg
6/a/4/6a47b2a6ddc9c10e.jpg
7/b/9/7b99d7a7b6b6946f.jpg
3/a/6/3a697259b5054ea7.jpg
c/b/e/cbe0b6c55fc727ab.jpg
a/c/3/ac30c49f455f34a2.jpg
0/2/c/02c66ce3caec4ac5.jpg
5/6/6/5662c1dfc9cb6843.jpg
2/f/a/2faa1642d40a0069.jpg
5/b/b/5bb6117cb009c792.jpg
2/a/6/2a6cd65e3d163e4c.jpg
c/0/e/c0e6bd3a4dbae4fb.jpg
e/3/b/e3be7c1022d5e364.jpg
7/3/1/731e050cdf50abe4.jpg
e/f/a/efa10e347361f033.jpg
8/6/3/863a33cd0f6c8085.jpg
0/5/e/05ee6e76f5470937.jpg
3/0/6/306355e48d333756.jpg
1/b/8/1b8cdd8067606410.jpg
2/0/a/20a8f92e480e0d20.jpg
0/d/2/0d2dd7b228f50a9a.jpg
4/8/9/4896be0d307dc182.jpg
8/6/2/862c53e55d7a9bad.jpg
e/3/a/e3af62d225660f7c.jpg
f/d/c/fdc3e1d7433303eb.jpg
5/5/5/555c52954486d28a.jpg
2/b/6/2b60bf59d8e79a98.jpg
d/3/5/d35de30ce87d5c2a.jpg
5/b/e/5bec95edc231b0a0.jpg
b/2/5/b25a4c6bdfb4f72e.jpg
1/8/3/1832068a3650900e.jpg
6/7/8/678d7a38354b6fab.jpg
9/c/4/9c451a02c61d4cf8.jpg
6/1/a/61ab8a5fff9021df.jpg
b/0/1/b0136a539b8dae0b.jpg
f/9/3/f93f934cb4968cc7.jpg
6/9/3/693c0d437dfaa643.jpg
b/5/a/b5af8a9f19251e75.jpg
9/0/9/9099c6084f63cbee.jpg
d/9/2/d927eab3eb39d485.jpg
f/a/d/fadf079736af457a.jpg
4/e/8/4e8b032465fe44a2.jpg
4/f/6/4f6d0c1e68c7e22a.jpg
e/a/a/eaa34bd8268e8a1a.jpg
1/7/7/1777480d956cd511.jpg
8/9/8/8988580f86d66913.jpg
6/0/e/60e2d83bbc43b533.jpg
9/6/d/96dbab4dcfdd7f62.jpg
1/b/3/1b372b74b667263d.jpg
a/b/7/ab79c04f88e678ef.jpg
9/4/f/94f7ed29bffb3b2b.jpg
1/8/6/186404685981a0d5.jpg
4/2/e/42edf0290a347dc9.jpg
5/5/a/55ac8fb9b2990c52.jpg
2/1/7/2176612347c4123b.jpg
d/3/2/d329c5403d934f1a.jpg
5/b/3/5b3aa1fd86acb18a.jpg
1/8/3/183cc0a87fe0323e.jpg
2/0/d/20d79169c08d83e2.jpg
b/a/c/bac544796b819bc1.jpg
2/d/2/2d2a19235108f216.jpg
1/8/e/18e52802d4c8597b.jpg
c/3/1/c31764bb86739540.jpg
6/8/0/6801a6952d708305.jpg
b/1/1/b11efffdf70b18bb.jpg
b/4/1/b419472bdd4a3a5e.jpg
5/3/e/53e1e4d07c3c381e.jpg
8/8/2/882fa18e6325f528.jpg
a/7/d/a7df0e6d842527ac.jpg
7/5/3/7533cee94c2f2aa4.jpg
c/f/f/cff306339d9c7b30.jpg
7/e/0/7e07186fc375b0cb.jpg
9/d/3/9d3505f4516f78aa.jpg
6/b/7/6b71fc99c9947ad8.jpg
7/f/d/7fd1181c8c2de4b0.jpg
a/8/d/a8d0c55f660adda6.jpg
a/6/d/a6d18a3f4c97e5f8.jpg
6/e/6/6e6fcedba98ee177.jpg
9/7/0/970d66fdbba499a6.jpg
6/3/7/6374455627070d52.jpg
8/e/f/8efedca2ca7da0ef.jpg
c/c/4/cc4016f02766d31f.jpg
a/0/8/a08f87038d77868a.jpg
4/6/a/46a6d45f1cca576b.jpg
f/6/4/f64d8874484e86c8.jpg
4/e/b/4eb0b500239f2c96.jpg
1/3/0/1303ce9e13e7d51d.jpg
2/b/c/2bc63b750b377703.jpg
5/4/3/54388f0ed881caee.jpg
3/f/b/3fb4b63a9e4aea97.jpg
7/b/f/7bfdde050fb5b7db.jpg
2/7/9/27919cecdbdee43b.jpg
8/3/e/83e1df3803bdc8f1.jpg
4/7/c/47c629893a5903f6.jpg
d/d/b/ddb3b3731e397f1e.jpg
f/d/6/fd6fcfd1b1216e8a.jpg
a/c/1/ac17c2ec2f27df03.jpg
5/f/7/5f7426234cb0df7b.jpg
e/d/c/edc4175814cb7704.jpg
0/1/a/01af72b089d0b7bb.jpg
a/e/0/ae0cd5e9815d8fed.jpg
3/c/3/3c3658ba636e30b6.jpg
2/d/2/2d2d8eb30c5a845f.jpg
7/2/6/7262c413735387c7.jpg
1/8/6/186f80a7f41ddfa6.jpg
a/0/3/a035f7a15bca00e7.jpg
e/0/2/e02dceee239c0b30.jpg
4/d/0/4d04bc67881bee16.jpg
3/5/a/35aeb8c3690a020b.jpg
c/7/2/c720ed368f4c0629.jpg
6/4/9/649abab6b1c1d563.jpg
8/f/0/8f0a6e032ce4c348.jpg
f/d/f/fdf19d8d88b9462f.jpg
6/a/f/6affbbb4a901c770.jpg
1/1/4/114c7bf8b23cfa7d.jpg
5/a/b/5abc010cb6d63b62.jpg
a/b/6/ab6ce4519add9464.jpg
5/5/f/55f0749457b58835.jpg
f/6/2/f62d301fbbb3d391.jpg
2/1/b/21b47857af037102.jpg
4/f/6/4f69adb7a4bf21f0.jpg
6/3/4/6342407383ebb480.jpg
8/d/8/8d8a4fba473bb03b.jpg
2/4/4/24496ffbe43c5c58.jpg
8/0/e/80e364138cad7aa2.jpg
2/b/1/2b18995f2a529754.jpg
e/9/d/e9dd5b7f66b0e748.jpg
3/a/4/3a464c3197a14228.jpg
8/1/8/8184d0fe1b53865b.jpg
e/5/d/e5dac7740a8daf7c.jpg
c/b/a/cba9c680786a9841.jpg
9/9/2/992bb893f9daa0b4.jpg
1/5/2/15272528463b19b0.jpg
8/c/3/8c3c65946f7b2b00.jpg
6/b/c/6bc0f803d7849d33.jpg
1/e/3/1e355742ca1996d2.jpg
a/1/7/a1715f0b603bcb44.jpg
4/f/5/4f5e80bf9710ff66.jpg
c/5/8/c58b83e017318758.jpg
a/4/8/a48662aabece12ab.jpg
8/5/1/85113aa45fa97c19.jpg
0/f/0/0f0f5694751d4661.jpg
2/f/e/2feca0031486e4b0.jpg
6/7/3/67350c1cd25eb8c6.jpg
3/9/5/3954da008c332c2b.jpg
a/6/b/a6bc5aa74d70c8ac.jpg
6/c/5/6c516657803af4c3.jpg
9/d/b/9db13dc805b05f72.jpg
6/4/0/640b13edf71b6998.jpg
5/3/3/533fa9d6fb121358.jpg
1/b/9/1b9e0de6d67f2816.jpg
1/4/6/1466fc0495b9c2c9.jpg
a/0/f/a0fd9cc968d7e7c2.jpg
f/6/7/f67e6731ad4068de.jpg
8/1/b/81ba88b453d49bb1.jpg
d/c/e/dcee69a69ca531b6.jpg
e/5/2/e52ca777bef4d582.jpg
2/a/6/2a6ff9b46aead822.jpg
7/9/8/798334a74d1d59f1.jpg
4/5/a/45afa4a5a40f246d.jpg
8/9/6/896254e4eb0b7771.jpg
8/c/4/8c473916af37b7ce.jpg
8/7/7/877d96d81400888b.jpg
d/0/0/d00fd2de69028339.jpg
a/d/b/adb8d6edfcbf7b08.jpg
2/4/4/24468cfad171bcb4.jpg
b/6/d/b6da812a55729c14.jpg
8/6/c/86ce2baf165d4188.jpg
7/1/9/719a392a3ef1fc89.jpg
8/9/0/890e59142922958a.jpg
5/5/a/55a4b9aee5920c87.jpg
0/c/8/0c82ecbdbe4db82a.jpg
d/4/3/d43aa4cdf7d7776f.jpg
3/2/1/321cb6f65bae9546.jpg
a/c/7/ac76d7d3a32af720.jpg
8/b/6/8b65ba697dad6ee6.jpg
f/f/0/ff0fd448b8f576bc.jpg
f/9/0/f90c95e22f8d82ef.jpg
0/2/6/02648dd2a140a5f4.jpg
c/d/1/cd12875da89626fb.jpg
8/d/5/8d514be980bfd3be.jpg
d/5/5/d5549ce61a47184f.jpg
c/a/6/ca661dc107f95d32.jpg
f/9/9/f99f0e5fa2cfe853.jpg
e/c/f/ecf8c69858efe725.jpg
9/0/4/90497f1145bae574.jpg
f/f/b/ffbb5105768e6ca5.jpg
a/1/0/a10f5a028ac15848.jpg
7/3/3/7334344d70eee841.jpg
f/2/f/f2f627a47b6e70ee.jpg
8/f/e/8fe6a6480a8fdcec.jpg
b/6/2/b62acf8918d324de.jpg
a/6/e/a6e8c24ebae53293.jpg
5/e/8/5e85530bd62e3702.jpg
b/5/f/b5f2af4ca757c639.jpg
e/e/8/ee8efdec14cf8ddb.jpg
5/9/0/590529e809d0d355.jpg
4/3/d/43d6d1105f2aa857.jpg
3/9/7/39797c91945ae91e.jpg
b/5/a/b5a8a22e2e2b96ef.jpg
a/3/5/a352a891bf8f0cdf.jpg
8/4/5/845aabe6d85388d9.jpg
1/b/4/1b4a0b137bdacaf2.jpg
6/2/8/628b07a33ae1dc11.jpg
5/7/5/575c59b019a8cf8d.jpg
4/b/a/4ba5b9443f34aef4.jpg
7/1/3/71390312087ca4ff.jpg
a/3/0/a305d12eaf8295e6.jpg
0/a/e/0aec8abcc40f07a0.jpg
9/2/0/920aa9c92df55887.jpg
e/9/8/e989fb6026d22c73.jpg
4/1/b/41bbe8347c4d7e11.jpg
f/f/0/ff0910e1ff0ced9e.jpg
6/4/1/6414ad1917f6ce37.jpg
3/5/4/3548d53ec9b7a136.jpg
5/6/8/56808341638449b7.jpg
7/7/8/778982786689d88b.jpg
9/5/1/95127e58feb21cb9.jpg
6/c/1/6c1bdc3ed456fc81.jpg
3/5/c/35c95efa629a407b.jpg
3/b/4/3b48c45efa4a98e2.jpg
8/8/7/887e2c48ff708d1e.jpg
4/8/6/48674585d92a6192.jpg
5/1/f/51f8190844e26ad3.jpg
c/a/0/ca06d149dd50edf9.jpg
e/9/d/e9d7c4e6791bedd2.jpg
a/e/7/ae7b778e2f8827da.jpg
6/f/8/6f8a713128112892.jpg
8/b/7/8b7f2f467a50a76c.jpg
4/f/9/4f951fcf6404dfbb.jpg
5/0/e/50e397debca71457.jpg
a/2/6/a26b3c9fcc982ba0.jpg
4/9/d/49db209f42933255.jpg
1/9/4/194debd41ee59b45.jpg
2/7/e/27ebb3a101762354.jpg
8/e/2/8e2273a6f603a32d.jpg
3/f/3/3f3e9f473fd40dcc.jpg
9/7/f/97f9f8a0af12362d.jpg
6/5/8/658228648b95a354.jpg
6/c/f/6cfda5256c8a83ad.jpg
d/6/4/d64a8e293cee92cf.jpg
8/8/9/88903e260499867b.jpg
a/e/8/ae8c192d04294f73.jpg
3/2/d/32df5f17578f900a.jpg
c/a/e/cae1b4ea87be42d5.jpg
1/3/2/13295663db41a7cb.jpg
5/2/c/52c911759bd71a49.jpg
3/2/f/32f6544975bfe2e9.jpg
8/d/a/8da82dc3a2ceaf63.jpg
7/8/8/788e5a76d1cc8c8a.jpg
2/2/1/2212f05ab6cd69ca.jpg
6/a/1/6a1e1e127a7d6b47.jpg
1/e/b/1eb06b92a18777f5.jpg
3/1/a/31af59c394348c21.jpg
9/d/c/9dc69fb6f01d8cce.jpg
7/5/c/75ccfe12c4fe605e.jpg
3/1/3/313adb5d406f9f03.jpg
e/b/4/eb4da32f30e6b43a.jpg
6/f/1/6f144fe3ff49ef71.jpg
a/d/2/ad2faecc50a11dde.jpg
a/c/e/ace953af6e10ebbe.jpg
9/a/4/9a430268e1f50bab.jpg
f/b/3/fb32569721234c12.jpg
a/0/e/a0e0d041e63b13fb.jpg
d/d/f/ddf8c70e3ea4675e.jpg
8/3/7/8379c404cf42655e.jpg
d/6/e/d6edbe62a2c0e31f.jpg
f/4/f/f4f222a9fcf0459a.jpg
6/5/7/657f4678c1bd42b0.jpg
e/b/4/eb4365ae5ae82dd2.jpg
e/d/6/ed698c1a4fbc2f1c.jpg
8/e/0/8e009327ed564a54.jpg
c/9/4/c94a7e65b7f430ce.jpg
a/c/7/ac7cac7dd3f9a1f9.jpg
4/d/6/4d61db1d0ac3e9f3.jpg
2/6/3/263af495b1918de1.jpg
3/5/d/35d29fa8ededa5c7.jpg
d/7/3/d73b3e53c10be2ca.jpg
b/1/8/b189a0bb089a1633.jpg
7/7/a/77a157728e75d2e7.jpg
e/7/2/e72d020a9953c6ed.jpg
b/e/4/be425af33e5e2093.jpg
7/3/4/734d47636540edbc.jpg
2/d/4/2d4a00111ef97148.jpg
a/7/2/a72cd1dac989314e.jpg
2/f/4/2f4aeedd1479cef9.jpg
9/2/6/9260ec3a7a629399.jpg
e/e/9/ee9fe41ef76aa09b.jpg
9/3/d/93ddc91c8da52400.jpg
d/2/a/d2ae15932bd7d4f3.jpg
3/1/0/3105ef527e721dac.jpg
3/2/a/32a9809251b58ceb.jpg
7/6/5/765635dadce1a856.jpg
8/8/a/88ae88558000c4a8.jpg
8/3/b/83b1f1885bf2918f.jpg
7/4/b/74b761c4c414c616.jpg
b/7/a/b7aac22ebcb102d5.jpg
9/b/a/9ba908d51e5c0855.jpg
1/e/b/1eb3f6f52c42873d.jpg
4/d/8/4d8c1424e472bf45.jpg
b/e/7/be759f57be2ee940.jpg
5/3/0/53073e9da8579aa5.jpg
0/f/c/0fc737c890d489af.jpg
4/8/b/48bfab86130ab1fa.jpg
a/1/1/a11bfb5be23b706c.jpg
0/c/8/0c8c009f4a4ab48f.jpg
c/b/b/cbb2631729c5be2d.jpg
e/f/c/efcba6437be574b1.jpg
b/a/b/bab370562479d11e.jpg
5/c/8/5c89ae1458801e27.jpg
7/f/4/7f43f7b9bbddb3ce.jpg
8/f/a/8fa7a5030dde582d.jpg
5/f/6/5f679c83f56a5ee2.jpg
2/7/a/27a8ea95f9340768.jpg
a/c/d/acda059af5bb27b4.jpg
d/a/c/dacc684e855fc832.jpg
a/a/2/aa29dcf113d1aecd.jpg
e/0/1/e015799a291ae043.jpg
7/2/d/72dd9fd7a188f151.jpg
3/5/b/35b5593bf8ef2f94.jpg
c/a/8/ca843f9d94f3d850.jpg
2/c/c/2cc4a5ccf247eaaf.jpg
7/4/0/7409512c04e91b46.jpg
f/5/5/f551727f464cefa4.jpg
3/7/9/379e2fe97af71867.jpg
4/b/1/4b17cac0f5bb226a.jpg
d/d/a/dda016f5bb8235cc.jpg
d/c/7/dc72e78caf86e355.jpg
3/a/a/3aa5262e9dadf9d9.jpg
0/2/3/023637b4238e3868.jpg
f/4/2/f421706ad47909f8.jpg
6/a/5/6a55ab5d170335bb.jpg
8/8/2/882309c002c5c4c4.jpg
3/6/d/36de41bf4c64021a.jpg
9/0/8/9081aa65b01d3ce9.jpg
8/2/2/8221f4c9229284f3.jpg
7/f/8/7f8e4b533aff38a8.jpg
7/8/4/7847c17b0a29d312.jpg
2/d/2/2d23905f15190821.jpg
0/7/a/07a83be1dc5f6233.jpg
9/8/2/982b50adc486bced.jpg
2/9/0/2902d574a6d34322.jpg
1/d/7/1d7c4a44587ee27d.jpg
c/c/5/cc502bb58135664a.jpg
3/d/0/3d027e930ed145ca.jpg
6/a/0/6a01c92d736cd81e.jpg
a/8/0/a80e37cded13ffa2.jpg
c/3/2/c32fd1aa552acba9.jpg
2/6/f/26f13d56f917378c.jpg
4/0/4/4047092280416d82.jpg
9/4/d/94dad365b076fb4e.jpg
4/6/3/463d652818a00015.jpg
1/7/a/17ac721dc68a7bbe.jpg
7/4/d/74dc8855853387ee.jpg
f/9/c/f9c986676d84db28.jpg
1/c/c/1ccdd096adc10d3f.jpg
0/7/4/074fcf3ba72fc9ce.jpg
6/a/e/6ae862d23dbac5ca.jpg
7/f/c/7fc190d8ffb9ef1c.jpg
d/6/e/d6ece0f0bd0505e3.jpg
2/6/8/268e95a852fc3d42.jpg
b/2/d/b2d78cac930d2b6a.jpg
8/7/1/871fc20c0a458f4d.jpg
f/1/f/f1fce118b3257b5c.jpg
1/9/a/19ab6cf13378b855.jpg
9/7/f/97f848feb914f91c.jpg
4/1/a/41aae7469fabc72b.jpg
7/3/5/7355eb6149d4eac1.jpg
3/6/b/36b38e396af3febb.jpg
0/8/5/08561efcb30db15f.jpg
5/e/a/5eaa7fc4348f0bc4.jpg
9/9/3/99339a2d3165b2ac.jpg
4/3/a/43af790d903ce18b.jpg
9/0/8/90848482079f0d46.jpg
2/d/3/2d3c7578f7619dbc.jpg
1/4/f/14ff14a44053b9ac.jpg
2/c/0/2c0044db93dfa767.jpg
a/f/d/afd06256bef5ef45.jpg
6/e/8/6e87bee6fe4faba8.jpg
b/9/5/b9508a82268b1500.jpg
e/0/e/e0e91206cc91c0cd.jpg
1/4/b/14bb0976b6c01868.jpg
8/8/2/882496bed75eab43.jpg
3/2/5/32545782e86529ce.jpg
2/9/3/293fe5cbb4ba39eb.jpg
3/8/5/385a63034596d807.jpg
a/e/7/ae77bafe9f45a829.jpg
c/3/7/c379fe806d6aa8cf.jpg
c/c/4/cc404f6c91f3abd0.jpg
b/3/c/b3ca7e43ce673901.jpg
d/8/e/d8e6aa451b537fbb.jpg
7/9/9/7993f218bcb3fef5.jpg
3/6/0/360127069bfb6236.jpg
8/c/3/8c3fde8a21ef6621.jpg
6/1/e/61ea4e3c4edd84ed.jpg
7/7/a/77a962baa92b279c.jpg
9/e/d/9edf2de3a9bba7a4.jpg
a/0/1/a0143557f1d4c11c.jpg
0/a/7/0a7490bcb70bcd4e.jpg
4/2/7/427217a325f6ff85.jpg
3/3/6/33687dcfc31cb95f.jpg
5/e/0/5e0159cfb0e8f500.jpg
7/b/d/7bd851d7d3dc8f05.jpg
0/1/2/01296ca684f20b95.jpg
a/9/f/a9ff66f0dc2fe4e1.jpg
f/7/d/f7d886c2766208dd.jpg
b/f/c/bfcc4c9d3c8bd049.jpg
e/4/3/e43fdee0cee51ea7.jpg
d/c/2/dc267076fc77370c.jpg
3/b/3/3b38720e3f4faf60.jpg
0/8/5/0853747b7dd725ad.jpg
e/f/f/eff3c06212de238f.jpg
c/5/d/c5d5896d1a1fffc2.jpg
c/c/e/cce90f79d17ba7f7.jpg
f/4/2/f421fefa4ac41b5d.jpg
b/b/d/bbd39c2186c29725.jpg
6/b/f/6bf0dfe44eb71bc7.jpg
1/5/c/15c25bd676b76fa4.jpg
a/2/9/a297dc5e9b979e23.jpg
3/5/c/35c53c12d9ca442c.jpg
0/d/5/0d5a3ed69ab03e7b.jpg
9/4/c/94c4b8e5da06ea64.jpg
c/7/1/c71d52043866d8f3.jpg
c/9/2/c9206f0521ca43a8.jpg
1/6/5/1650c59976985199.jpg
a/1/6/a166128bab3fe7d1.jpg
5/2/9/5293e2e124a57f3c.jpg
4/4/9/4494fdcf7411a708.jpg
d/0/8/d0890f476d1feea1.jpg
7/4/9/749d48055b7cbbf5.jpg
c/8/5/c855b14bd6209775.jpg
1/0/6/10644d44c84a5cf7.jpg
9/f/f/9fff5aee56f6338f.jpg
c/9/a/c9a23c8fcb88bb6a.jpg
a/d/e/ade9c5d3588c80d6.jpg
2/1/e/21e49e71ee3fbb73.jpg
2/2/0/2201b00d917f8680.jpg
0/e/5/0e550d8578568ddf.jpg
e/b/a/eba76d599d769bb0.jpg
d/0/b/d0b97008f81356f9.jpg
b/4/1/b413b18fa7e2cee5.jpg
d/d/3/dd39307f240d28d9.jpg
7/7/b/77b5d7a640a03da7.jpg
0/6/9/069410c3a14a86ea.jpg
b/1/a/b1a80d5e5a813a9f.jpg
a/d/5/ad5cce078f32061c.jpg
2/e/b/2ebc36c9eb497ca3.jpg
3/4/6/346fc64d8699c046.jpg
2/1/8/218a8e83f274f060.jpg
d/3/6/d36fd774ffcea18d.jpg
4/0/e/40e72a6e2ed6b448.jpg
c/3/6/c36d2f486d0777c3.jpg
a/9/9/a994d64665329ffe.jpg
b/9/e/b9e57300880e1121.jpg
7/d/8/7d892b64b7ff2d4f.jpg
8/2/3/82393e81155fc6c2.jpg
3/9/a/39aaa1de1caa466b.jpg
7/2/2/722149559834680d.jpg
5/3/5/535d0b84b7efb193.jpg
c/1/0/c10e2bd503feef96.jpg
3/0/3/303a959f80b5f7d1.jpg
3/d/3/3d38a1827d525af5.jpg
8/8/3/88320bf3b650880f.jpg
c/b/e/cbe8a122ad2cf34f.jpg
3/1/6/316d8926a737c84a.jpg
c/4/d/c4d446b465fbfd66.jpg
5/0/a/50a82ff0a4fae7cb.jpg
4/c/4/4c40b66376a35ff7.jpg
5/7/2/5729ae0d3568f12c.jpg
8/f/a/8fa8e56e14b24222.jpg
f/8/6/f86d9a2efc81e78e.jpg
0/7/d/07d0f685441aa1b0.jpg
e/f/5/ef533110df5bf26d.jpg
f/1/4/f140b2ab3bb057e2.jpg
f/7/7/f777b3a4cc2b1e7c.jpg
b/9/0/b90916b4659c0d0a.jpg
a/2/f/a2fc6403876a53ad.jpg
9/2/8/928eae408b95976d.jpg
4/4/f/44f0fa1be2504efc.jpg
7/2/6/726c00492f91fc1c.jpg
0/d/e/0de31c2ee0f8d8dc.jpg
f/a/a/faa3e4ffdfa2e06b.jpg
e/6/1/e619670bd1e26e0b.jpg
e/a/0/ea041a12af2da297.jpg
4/8/e/48ed5a2953a1fa86.jpg
f/4/3/f43dea3b494b37bf.jpg
8/a/8/8a8324804c623d82.jpg
c/1/5/c1559414f4a135da.jpg
6/6/7/667cf041c8963f68.jpg
1/a/c/1acaf1677f8632e5.jpg
c/d/b/cdb16c6369df9f18.jpg
3/0/3/3034260506d2d354.jpg
d/9/3/d93dc81b6dc77ae3.jpg
b/4/2/b429b9a098b9292b.jpg
7/e/0/7e0d33914c6e8ddc.jpg
3/7/a/37aa8edf73f92746.jpg
a/6/7/a6790ba362c915bd.jpg
2/2/8/228ac13323975ec0.jpg
2/c/e/2ce1d4f4035fa6ca.jpg
6/b/3/6b3ca64416cf2318.jpg
b/8/6/b86c653d26446f31.jpg
4/1/b/41be47fd856092bc.jpg
c/7/1/c718668a5e23e538.jpg
f/e/8/fe8cdd64b9c0adab.jpg
4/6/5/465cf79186ede64b.jpg
9/2/9/929f7ff68703d65b.jpg
4/c/e/4ce8f596e85bbfba.jpg
a/6/7/a6770bc6ca43c9cf.jpg
a/f/6/af6495acfee60de2.jpg
3/f/c/3fc5edf347b4d3c3.jpg
9/5/f/95fb791d4e876bba.jpg
1/4/a/14aa2a6b16dc339e.jpg
4/1/c/41cf8826d4c7b965.jpg
9/f/1/9f1712ec1bb7092d.jpg
2/3/4/2347e8152381a312.jpg
7/e/f/7efb1600d7b18c10.jpg
a/b/b/abb98d83f8bdfe3a.jpg
0/e/6/0e678fb2cf4c869e.jpg
c/8/9/c89b675646f7bcc7.jpg
f/0/8/f08942395c19a00e.jpg
2/4/8/2488690a1f797d85.jpg
e/1/c/e1cf7488d68a70db.jpg
b/c/f/bcf746a0c3451aa7.jpg
8/7/d/87dbc1d00ef3af69.jpg
d/8/7/d87e4231d587f982.jpg
2/7/9/2793ab57929c1241.jpg
2/2/5/225f7e2f8aadf1d4.jpg
1/3/2/13227d0d34f1b428.jpg
2/5/e/25e08232feee7ea3.jpg
a/8/e/a8e8b4cb6e689e3d.jpg
f/0/e/f0ed8185dcf7a5d4.jpg
7/c/4/7c40cfb23f63ec9b.jpg
b/e/e/bee0117b1d55abdf.jpg
b/8/6/b86fc4931f3bb688.jpg
2/b/b/2bb7fa7a9aeeaf09.jpg
d/1/a/d1a02e657b7afd41.jpg
0/0/1/001db8ed03ca3207.jpg
4/f/e/4fe9bca425383062.jpg
d/4/c/d4ce72f531da5a48.jpg
a/f/5/af546bbfc5896407.jpg
9/b/9/9b92b55275d5bfec.jpg
d/3/7/d378183e5c941266.jpg
d/f/7/df73cac68f681ed9.jpg
d/c/7/dc70b80a33b855f8.jpg
6/2/f/62f7b6ef57be5b0b.jpg
a/0/2/a02da71ec4b0234d.jpg
b/e/c/becf45d6c6a15f09.jpg
1/b/b/1bbafeda99b166f6.jpg
6/5/2/652f13628732fa3c.jpg
3/0/0/3003ae5df65daa2e.jpg
8/5/0/8508e1db3422cb1b.jpg
e/e/6/ee6791c4d2c6fe9e.jpg
7/5/1/7517376507c56776.jpg
c/e/7/ce7614ce1e32a7c0.jpg
2/d/f/2df877353ba1c973.jpg
3/2/4/324bc1d8216c3e0b.jpg
d/7/f/d7f82af1ba0a5375.jpg
8/b/a/8ba58532623da766.jpg
b/8/2/b820f696a12ca905.jpg
a/1/6/a16d72b424e669e7.jpg
f/4/6/f46589a84a549cd0.jpg
d/9/5/d95f136c1d494637.jpg
6/c/3/6c300767111d9de8.jpg
a/4/6/a46b695c6acd406b.jpg
4/d/9/4d9974548d943b86.jpg
e/0/3/e039aed9dc2f4c19.jpg
9/4/e/94e3bd6d5ebbe1d3.jpg
6/7/4/6741f3378caae760.jpg
4/d/c/4dc7fd20e183803d.jpg
2/a/3/2a35f832d88a29bf.jpg
2/b/1/2b1b4af16ff716f2.jpg
8/c/5/8c5714b2124da115.jpg
b/7/b/b7b67d91269651fe.jpg
c/d/1/cd112103d6a4be56.jpg
7/b/a/7bad02da168c74c5.jpg
9/a/1/9a1875e623990e22.jpg
1/4/8/148fdb2aa5888058.jpg
c/c/f/ccffa1cdc8e8476c.jpg
e/6/0/e60b3b5d6f2b0191.jpg
c/d/2/cd26c732ec366541.jpg
f/b/6/fb6192abf6d018a5.jpg
2/5/0/2508a20aeb5282f3.jpg
1/2/0/120b84eb3b9201ef.jpg
9/a/3/9a335c294d65366b.jpg
3/e/0/3e0c71392893ae24.jpg
6/b/2/6b2235f8a82c2a8d.jpg
3/6/c/36c6f80c78f06035.jpg
0/f/a/0fa39ac8616a26ea.jpg
0/e/1/0e13fad618bc28e9.jpg
3/f/3/3f30380f4458684b.jpg
2/5/b/25bfc119179028d3.jpg
c/4/c/c4cb55c5f71562c3.jpg
9/3/4/934fc0aed30ba88e.jpg
a/6/6/a66e7d95c3236e43.jpg
7/4/f/74f8f05df2142b71.jpg
9/b/e/9be3c60ec51ae7a8.jpg
6/e/1/6e13725afe58c940.jpg
b/2/8/b284961be57a7260.jpg
1/1/2/11235006b19084ad.jpg
d/a/6/da66685a03261577.jpg
9/4/2/9426dac2f4d2e75c.jpg
b/3/3/b333b2750f300a5f.jpg
f/5/b/f5b0323d47f6e451.jpg
9/5/c/95cc56f42b444f53.jpg
4/9/4/49412724e4e5822d.jpg
b/7/3/b7396c036455fef9.jpg
0/7/9/079cf62576e9ee45.jpg
8/1/c/81c324dabccfbb5d.jpg
0/5/3/0534751f694b6bf1.jpg
4/0/a/40acd3bd63b1785b.jpg
1/0/8/10844a6d6716bf04.jpg
5/7/f/57fca5ff2e3ded07.jpg
e/a/4/ea4a0f7c0cdfad8f.jpg
6/9/3/69391227fdf7a2a3.jpg
f/e/6/fe6b79f0648799e6.jpg
2/3/e/23e168f2b9593b3c.jpg
1/6/2/16218b8639dd1dc9.jpg
9/8/6/986ee665c3f35d17.jpg
7/9/3/79338ca9253b69af.jpg
3/d/3/3d35bc4de57c050f.jpg
6/f/e/6fe70782f46144d6.jpg
c/6/4/c6452ac79d7d7efc.jpg
0/f/a/0fa5b7fbdd2e530f.jpg
8/a/5/8a5e16840b19d33d.jpg
a/0/9/a09a1077e3ce2e9f.jpg
0/d/5/0d530ac5c576dda3.jpg
3/4/f/34fa9b2b9585650f.jpg
7/5/b/75befc51c73e8170.jpg
b/b/5/bb55422472dad2cb.jpg
b/3/e/b3ef52c286a1a9e5.jpg
d/7/8/d78f892ec5b1106e.jpg
0/2/b/02be7ef45bd552aa.jpg
1/5/2/152c3107077de7b4.jpg
8/1/0/8107df0ab8d99fc1.jpg
3/8/c/38c51b5053cb45bc.jpg
b/6/6/b66191ead25aef33.jpg
e/0/5/e0514d91b5190361.jpg
f/c/e/fce9d7a8f0f36c58.jpg
3/6/8/3682f10d0bc75548.jpg
5/0/3/50364c1117aa85da.jpg
b/4/c/b4c33ee6e8d69577.jpg
e/9/6/e9648d79aa519dd2.jpg
c/3/a/c3a04babf0111e59.jpg
9/3/2/93211a1088233a2c.jpg
0/a/1/0a1b5b526bb44389.jpg
f/6/f/f6f2f2188c444cad.jpg
b/3/0/b30911d86cdf3059.jpg
4/e/6/4e60bd52472a2474.jpg
7/6/1/7618b85d9458544c.jpg
4/c/a/4ca51a29a1b10b8d.jpg
5/b/b/5bbea43e2b5a093e.jpg
2/5/8/2589345c338e0cfd.jpg
b/d/b/bdb8c502d2e0d627.jpg
a/b/c/abc4da6530e148d5.jpg
6/6/3/663f9b94a8d77685.jpg
6/b/7/6b792a2e68cce37e.jpg
e/7/a/e7a11f1f41eb5bd0.jpg
4/0/9/40932a14084aee86.jpg
e/6/4/e647eff2075cd823.jpg
d/8/0/d8020f43e9d66891.jpg
9/1/a/91a8a64b37aed825.jpg
3/5/d/35dbee886dddf12f.jpg
6/b/8/6b8f039cc26dc361.jpg
d/e/e/deea7640d7f49acc.jpg
6/0/0/60098f74fb4b1790.jpg
7/d/0/7d0b44fee2b69efc.jpg
1/0/b/10b4a3fa2b356108.jpg
f/9/3/f9379fa1e0633db6.jpg
f/9/b/f9bfe2cabb4a6d6c.jpg
1/5/9/1590b6c1f13eaf22.jpg
f/c/f/fcfc358b0dbbccca.jpg
0/1/f/01f76f77562cb4ad.jpg
d/7/b/d7bba79c32cf49e0.jpg
e/e/5/ee532da160b8dcb5.jpg
1/b/d/1bdd9de617ed1689.jpg
b/8/0/b80026ae533a2988.jpg
5/a/3/5a344c2c40a2c612.jpg
b/d/e/bdeb912e28d2a024.jpg
9/5/5/955f6aaca2ad7130.jpg
8/c/2/8c2b364d2a26e1e4.jpg
c/e/d/ced0c2508495b839.jpg
3/9/f/39f8fc5211182faf.jpg
4/9/a/49a4731300ffb977.jpg
a/a/6/aa68ce95953c19e1.jpg
b/d/a/bda6c8a023cfae06.jpg
c/e/4/ce4dec7c9f20e678.jpg
0/2/f/02fa2db8fdf73383.jpg
1/9/f/19f29cd3a492f0e3.jpg
5/a/d/5ad71e1de6df8abc.jpg
f/b/6/fb68393ff86c11b5.jpg
7/f/8/7f8542d0246fea48.jpg
f/5/1/f51def0e571620a0.jpg
d/6/7/d677d6ef84d4420a.jpg
7/d/2/7d218251c207a235.jpg
4/2/6/42611a1781692868.jpg
a/6/b/a6b6d7398fd519a2.jpg
0/c/1/0c12d9574855b424.jpg
9/5/e/95ebf30e1432ab84.jpg
f/a/8/fa8a8928762f0dad.jpg
7/e/0/7e0d533008d63e11.jpg
9/b/5/9b58f0117cb39299.jpg
a/f/1/af1d7154c2f0ff54.jpg
2/8/5/2856763b65f45e8f.jpg
8/5/f/85fc3bd48ba39077.jpg
9/e/4/9e4521d9bb1b0e1f.jpg
2/2/3/223b10f050a9f313.jpg
c/a/c/cac37af3733b979b.jpg
1/6/2/162667ac34ac2f7b.jpg
b/0/5/b05bb299ab778171.jpg
2/5/f/25f419ac519f24de.jpg
e/a/f/eafc759ad06c29ee.jpg
2/d/7/2d739c93959d6c45.jpg
3/0/6/306499281d588fea.jpg
b/d/7/bd72e5d18b081a02.jpg
6/5/2/652e5455d97487cd.jpg
5/f/3/5f36250cd198a2b0.jpg
c/5/c/c5cbff3f6491816d.jpg
0/8/9/0890987a2fe1afdf.jpg
1/e/2/1e2855f64efc5410.jpg
d/6/4/d6409073e0dbea29.jpg
7/5/4/7545b92aae9c0eef.jpg
e/a/5/ea59038a7a39d823.jpg
1/1/5/115ed2bcc586d4de.jpg
f/c/a/fcafd64b96fc403e.jpg
4/c/3/4c3269def76274a0.jpg
0/d/0/0d00e91cffcfbc4b.jpg
1/b/0/1b0efa18eab67b32.jpg
4/9/3/493c2be08774406a.jpg
d/2/1/d21f4ce1340098e0.jpg
c/8/a/c8aba936dbfc1dcf.jpg
7/d/4/7d4a1289dfc4593c.jpg
b/8/7/b87b903f2875c906.jpg
e/2/6/e26fb1b69d82bc8f.jpg
3/6/d/36dc2f4756dd5a42.jpg
a/4/7/a47653dc01e5cc71.jpg
1/7/e/17ee8c8ce749a44f.jpg
7/7/f/77f174488b9ead98.jpg
5/c/b/5cbc4c833c3212ca.jpg
b/b/b/bbb24df1173e50f4.jpg
d/a/0/da0f6d14d2e78400.jpg
a/f/f/aff5eddc3d585dfd.jpg
b/1/f/b1f6945176582623.jpg
a/6/1/a61159c16e9910a9.jpg
0/3/7/037481a13c9774f9.jpg
6/b/3/6b3d4fa1f2c74f83.jpg
5/6/e/56e0fe801abe9404.jpg
f/1/8/f18f0c3a87840363.jpg
b/0/8/b083e68ce9e18000.jpg
0/9/2/092762a04070f26e.jpg
d/b/5/db54581e0dc12a60.jpg
1/7/d/17d8af563815bc92.jpg
4/d/3/4d3e89d3381bb889.jpg
8/1/0/8109d668e24f32eb.jpg
1/6/4/164114d156b6d466.jpg
d/1/b/d1b12e1ac236d730.jpg
4/2/b/42b8e7c6a0819f14.jpg
2/7/3/273a511dce2f9c62.jpg
6/b/8/6b8d8a76b1c6b491.jpg
4/e/d/4eddd4c45155ef4c.jpg
3/8/d/38dfe53b34f4bc39.jpg
8/3/a/83a7302bafcabad6.jpg
8/c/4/8c4ff4647b76c466.jpg
b/2/4/b248a43718de970f.jpg
9/5/5/955513a568894caa.jpg
3/3/b/33b735822e89ff95.jpg
8/b/9/8b9ef3fb9c327528.jpg
d/e/9/de92c345f708c57f.jpg
9/7/5/9759c2a3c253de5c.jpg
b/0/e/b0e56a2b6e06f04b.jpg
b/5/2/b526a6ba6b5e0966.jpg
3/e/3/3e3d4fa02100b9fc.jpg
8/3/c/83cc152fb28aa20b.jpg
e/0/b/e0b3a127abc3ceea.jpg
7/8/d/78d51df16fa70201.jpg
3/e/5/3e5ce250b3b9742b.jpg
a/a/8/aa8c2787ac00856e.jpg
4/8/7/4873ee980a202c9f.jpg
6/0/4/604c38ecb35a6a0e.jpg
d/e/7/de784609dc239f4f.jpg
e/6/9/e69711d4e129dad5.jpg
a/4/8/a48238394035dabf.jpg
1/d/3/1d370661c4ba47ec.jpg
9/5/c/95c32a451ed146ab.jpg
2/4/4/244e152a0cccd71d.jpg
d/a/3/da38d2154defd048.jpg
2/2/7/227659dca6b9adee.jpg
0/5/f/05fbcd75fa3f98b6.jpg
8/4/f/84fe5099cef90e3a.jpg
9/5/1/9512da26b21bd262.jpg
0/0/5/005743c1777c292d.jpg
a/b/e/abe1c6f1097b9c66.jpg
2/4/3/24388f9d1c9c2192.jpg
b/7/6/b76cc7a6a7bc26c8.jpg
a/5/f/a5f7742c6183d530.jpg
d/c/6/dc65f41a84666f62.jpg
3/c/1/3c10e42028d939bd.jpg
5/1/8/51867ac83947972e.jpg
4/b/a/4baa248cb393f2fd.jpg
4/7/9/47961e3055690cf8.jpg
0/0/0/0004f0c06a08f198.jpg
d/8/f/d8f356f26b6783c3.jpg
7/3/5/735de7a2abe3b78e.jpg
a/d/7/ad76296e0d6e2dbe.jpg
6/e/f/6ef500caae5d18ae.jpg
6/1/f/61f3290501554bd8.jpg
f/d/e/fde8a746e3b5be52.jpg
5/f/7/5f7a1f53932d669d.jpg
7/c/b/7cbcedcc8f130968.jpg
b/7/4/b74a27552efd7f02.jpg
0/c/8/0c81d82161cf0c97.jpg
7/a/f/7af314ff5fd80ee6.jpg
4/a/9/4a9ccff34ed42e24.jpg
c/9/4/c941a3157659e552.jpg
c/b/6/cb61d2d7d4bba23b.jpg
f/a/7/fa7bc9bbe68c70b9.jpg
2/1/1/2112faea0365582c.jpg
6/8/5/685277bfb7488f26.jpg
2/0/d/20d871b5838dbb06.jpg
8/3/b/83b9a303e9be17a9.jpg
2/3/0/23021222b43e4687.jpg
1/a/b/1abbe0ba1dc14e42.jpg
c/9/6/c9644673b6171922.jpg
1/a/3/1a3eec4902a3b46c.jpg
4/3/9/439c52ca749bb1e7.jpg
0/a/d/0ad273875f23ff3b.jpg
3/5/7/357362b823d783eb.jpg
a/d/0/ad096adf6b5d40ec.jpg
0/d/5/0d5da13c76314b84.jpg
8/d/f/8dfc58175312bfdf.jpg
8/2/1/821d9eedc32e5954.jpg
3/c/6/3c69c2513c483934.jpg
c/6/8/c6894155cccd766e.jpg
a/1/4/a14ef912d4ea8ed1.jpg
d/d/a/dda0c6b64fde4a5b.jpg
f/7/6/f76b450978c9e427.jpg
6/d/5/6d52b77c813da11e.jpg
e/4/2/e4299de5e6521942.jpg
a/b/3/ab3bc96a385a79cb.jpg
e/3/a/e3adffb0a020fc09.jpg
e/a/7/ea71e57cdbc70b1a.jpg
9/2/0/92018e79d640e293.jpg
0/d/c/0dcdc9fa81b39f52.jpg
1/9/c/19c86cf2939373f2.jpg
3/9/6/39656dfa72531108.jpg
c/c/8/cc850e11e102029f.jpg
5/c/9/5c9f37f768251039.jpg
d/7/7/d77aee5299c5fcb0.jpg
5/5/4/554b84fe290c723e.jpg
6/d/c/6dcbe7a00f5cc7e5.jpg
c/7/d/c7d3e5aa2de807cf.jpg
6/d/8/6d8b348fcfeae070.jpg
6/3/a/63ab35530c4b8884.jpg
e/e/2/ee2d4bca42017d71.jpg
b/c/a/bca63695167b962d.jpg
e/9/d/e9d301d84106ea38.jpg
1/3/7/13706f1ffc59df02.jpg
1/b/8/1b87834199e0ff9a.jpg
9/e/9/9e969109b0e90118.jpg
c/8/8/c889ea30722f53c1.jpg
9/0/e/90e2117bf705623d.jpg
6/a/a/6aa56d08c20a7cdd.jpg
0/0/4/004a055b4d1f8a1a.jpg
c/6/2/c62f3acefaf0bdb1.jpg
7/1/9/71908be78b82d229.jpg
7/0/a/70a962416f0dda0d.jpg
3/2/f/32fbe91c03b842a6.jpg
c/0/6/c06b9f5e41e99df2.jpg
8/1/5/81589b32b84ab532.jpg
1/1/c/11c698b830982854.jpg
d/d/6/dd668c11c16e2204.jpg
9/7/a/97a4f8d977a04606.jpg
4/a/5/4a56777903490186.jpg
2/d/2/2d278267259b028a.jpg
1/e/1/1e1b5c0cdec94632.jpg
b/b/8/bb88f59f7ed2ca97.jpg
c/a/d/cadd4898ee65d4fd.jpg
f/c/8/fc8530e5b91992aa.jpg
f/c/3/fc3612ae675335ce.jpg
f/7/2/f72bf3820a65d338.jpg
f/2/1/f219752260aafe88.jpg
a/0/2/a02dd06eefa2b4e1.jpg
7/b/5/7b5da0a975c4ce9e.jpg
0/7/3/07357f3ea5586969.jpg
a/6/0/a6001d935e4549fa.jpg
a/8/2/a8283b2b355be795.jpg
8/d/1/8d12a176e5d3117a.jpg
f/6/b/f6b8b5f955393642.jpg
5/6/5/5651fbe90bb21212.jpg
1/a/5/1a5b8dd888980346.jpg
a/c/2/ac2c1dfa225230e8.jpg
9/f/f/9fff8bb562d8bdf2.jpg
1/d/d/1ddde0a124982710.jpg
6/7/8/67825c8e00b9aadc.jpg
d/1/9/d198f7918f99e7cc.jpg
b/4/9/b49daa5bf6db1f7c.jpg
9/3/4/934877cff3ff5bd2.jpg
5/d/9/5d9d2afec8f3906e.jpg
3/0/a/30a5e9b81c6799f5.jpg
d/b/9/db9d99b457968746.jpg
f/e/f/fef6f5ee13364f88.jpg
6/3/e/63e705ec96a17208.jpg
8/b/7/8b78808a522d53d6.jpg
b/f/8/bf86943f60309786.jpg
a/7/8/a78edbec87a1ecd2.jpg
3/b/f/3bfc693f0ec001f1.jpg
6/c/0/6c0aeadb7a1a210e.jpg
4/9/1/491a1a2963d04d6d.jpg
f/4/c/f4cb2930c648f482.jpg
2/6/a/26a96475547fa52b.jpg
9/4/8/94800f262acf3265.jpg
0/0/3/003b9f16bad9e24f.jpg
a/7/e/a7e3edba0917bd9d.jpg
2/f/a/2faece7e77b2437b.jpg
1/b/7/1b71783971b6fb4b.jpg
6/7/f/67f47bd2403c8590.jpg
a/1/2/a12355154bfcf282.jpg
c/c/2/cc2b2c7e85af4dbe.jpg
4/c/1/4c11796421225870.jpg
c/3/1/c313653d624d2a63.jpg
8/9/d/89d845b994faa4c3.jpg
7/3/5/73587051be0b7897.jpg
c/f/b/cfb8b936791823a3.jpg
3/8/c/38c879d297e0eeb1.jpg
3/e/1/3e1128b4171fc765.jpg
4/c/f/4cfd5a73e5d9e97e.jpg
d/4/5/d45d95c3c57bd0fd.jpg
6/d/7/6d7431c230dca143.jpg
f/9/e/f9ef75838cf3ede4.jpg
f/8/1/f81c1fd206825b20.jpg
b/7/a/b7ad82787a26858f.jpg
0/b/f/0bfb2269b7c23948.jpg
5/6/3/563f53f49879541c.jpg
f/a/d/fadfba5c47e02638.jpg
b/e/2/be264dc6c075957c.jpg
d/0/5/d050286a8567e870.jpg
b/e/c/beceba0c9d493dd7.jpg
9/d/6/9d65e4a4ec3e636f.jpg
a/4/3/a432dbd807e5029a.jpg
7/1/d/71d1bdab8250ac64.jpg
7/2/d/72d66a708138f2a5.jpg
5/b/e/5be2a9637f45f03a.jpg
c/d/8/cd8dd09f505e53eb.jpg
e/4/0/e40991f7b8005a4c.jpg
7/d/d/7dd9d880177411cb.jpg
d/0/4/d04c8357ea020383.jpg
f/f/e/ffed891089296812.jpg
f/d/8/fd876de642238c26.jpg
e/8/8/e884896cf0e39b4e.jpg
a/3/b/a3b4a5f8875a9b5b.jpg
2/8/5/2855e2079a118ef1.jpg
d/0/1/d01a6c709ea206ef.jpg
d/d/7/dd751354cda74c7e.jpg
d/d/3/dd3d638a7828601c.jpg
3/a/0/3a039aac78ce4b2e.jpg
4/f/d/4fd81a9299113de3.jpg
7/8/b/78b1cb290f93f2bc.jpg
5/f/2/5f28a8b288ed2f9e.jpg
a/5/d/a5d3eec87d942902.jpg
4/b/c/4bcafcd8ce43561a.jpg
7/5/f/75fbd898f63006bf.jpg
8/d/b/8db7dc0d45a9e98f.jpg
1/7/8/178be5935900e2eb.jpg
9/0/2/902754ca7fd732db.jpg
8/8/1/8814ec961595cefb.jpg
0/0/f/00f25d07150efa9a.jpg
8/6/a/86a9f432c70a5f29.jpg
9/4/a/94ac42783061991f.jpg
8/b/c/8bc84e246859af28.jpg
5/8/0/58020c5426453440.jpg
4/4/3/4430e4b6db7103f9.jpg
0/e/c/0ec798512baefe64.jpg
2/7/f/27f4e727ecdfecfd.jpg
6/e/5/6e5355a9cfbb5fa9.jpg
c/1/3/c13ac124458e5fc3.jpg
c/e/f/cef0accffd7ba0f1.jpg
4/6/7/467fdadc1df41dcb.jpg
8/b/7/8b77bb07262e9736.jpg
f/5/a/f5a764fed6c58602.jpg
f/5/3/f535e5c94a13e2b8.jpg
5/f/7/5f7470d6534902bb.jpg
9/1/a/91ad290401caae97.jpg
7/f/0/7f01fc98c50b1ee1.jpg
7/b/9/7b9069a1eb46a421.jpg
5/2/b/52bfcfa906855edd.jpg
1/d/2/1d2b2cf34aa1cea3.jpg
f/c/6/fc6ffdea7c8194fd.jpg
1/b/0/1b0f865f678085b6.jpg
5/e/b/5eb7520fb76c5ecd.jpg
7/a/4/7a4596acca44f2d9.jpg
f/c/2/fc2b7694543995fa.jpg
2/8/4/28474e90555a16c6.jpg
c/6/3/c63c1f047a258d96.jpg
6/5/4/65402adf3dec609b.jpg
4/8/f/48f426eb94c612a6.jpg
7/3/7/737c21791acb36b8.jpg
a/f/5/af5d206f1aa26d4a.jpg
9/0/3/903c78da2a88a513.jpg
9/2/f/92f37be282695b6d.jpg
7/6/f/76ffa29e35c6f326.jpg
b/c/3/bc3d5b71aad6299e.jpg
6/1/0/610fdc6808e7d0b0.jpg
7/7/9/779948082e8b22fe.jpg
2/7/b/27bf69686709dcf8.jpg
6/3/2/632b5906ff0c7d78.jpg
7/a/f/7af30d1ba5a281e4.jpg
b/1/a/b1a999e984b6a3fa.jpg
3/4/e/34e1edc61e8cce97.jpg
9/a/6/9a6277bbb221fe75.jpg
2/2/5/2254531f2d7a9700.jpg
2/6/f/26f72ebb647057e4.jpg
f/8/9/f89bf3417ea48561.jpg
9/8/2/98287e342b9f5661.jpg
1/f/2/1f2dfa42a98de219.jpg
0/b/1/0b1328612ab95845.jpg
b/6/c/b6c61098d8e9c6df.jpg
e/4/6/e46c1e4937bd3739.jpg
b/5/7/b57980746dd324a7.jpg
e/e/4/ee4a8b9311400ccd.jpg
4/5/f/45fca10e6a628462.jpg
7/3/7/73777a018738e43a.jpg
f/4/4/f44250b051c15e2d.jpg
a/6/d/a6da3cbfae303038.jpg
b/f/8/bf8e98cd1852a20c.jpg
0/3/f/03fc20a365e43259.jpg
f/1/6/f16d81d835f6e525.jpg
3/f/8/3f8bda1beeb5bb36.jpg
c/7/3/c73656ada30bc0f4.jpg
2/0/c/20c966e9ec520caa.jpg
b/0/b/b0b7f6dee401d051.jpg
f/6/3/f6367ea1f11da836.jpg
e/0/6/e06dca0c43332fea.jpg
e/6/d/e6dcaa6917b7376f.jpg
7/a/b/7ab1f6fd50dafd60.jpg
0/c/1/0c1d66fbb20c3c2f.jpg
1/6/2/162aae3d656da2b1.jpg
c/d/c/cdcd5c737cb77ae0.jpg
2/2/5/225a3911f11050fe.jpg
c/5/6/c564e9f3bde08f82.jpg
e/b/a/ebacc735cdb15b70.jpg
c/f/4/cf4050aeb6b370da.jpg
d/e/e/dee239ec8431bc4f.jpg
1/6/5/165834c952b73f9f.jpg
8/1/3/813143b6ccd147df.jpg
0/a/0/0a06db5e6c6e89a1.jpg
f/a/6/fa68d8a456f75119.jpg
5/4/6/546977b4c7246c87.jpg
f/8/d/f8dd1b2657c4f586.jpg
e/7/a/e7a709cf0899a311.jpg
9/a/0/9a093a4bee2105e7.jpg
3/d/8/3d863a68a78f4a73.jpg
0/a/3/0a319209d33d8c70.jpg
a/0/4/a0413d10cf097bb0.jpg
4/0/f/40f614dd86d208bc.jpg
8/c/7/8c7e1c785c804f50.jpg
6/2/7/6277b05449dfcfeb.jpg
2/5/7/257d5fb21760418e.jpg
1/a/0/1a0aed3743e674e4.jpg
5/f/7/5f7b8fe58f1992c1.jpg
e/e/e/eeeba5a4cdfbe5ff.jpg
9/3/c/93caaf72a113c4ed.jpg
8/c/a/8cab55c9d0f492e3.jpg
3/5/b/35bbdbab3002a23d.jpg
a/d/2/ad2d1081fe1b88f0.jpg
8/4/5/845d553a8674d08a.jpg
9/5/a/95a60dac1171367a.jpg
7/7/6/7769b7e696062bfa.jpg
b/7/1/b719c35d5f572ff4.jpg
c/0/a/c0a9e2d08c7241dc.jpg
7/5/f/75f0584ffd0d49a6.jpg
9/5/4/954b8d7b1ede304a.jpg
c/2/e/c2eee8d0b1a22937.jpg
5/d/8/5d8207e4997a867f.jpg
e/5/8/e589120eaf42de98.jpg
8/7/a/87a8a112f79dc2b1.jpg
8/7/7/877a020df4105009.jpg
f/f/b/ffb69a6d4cc1bd2b.jpg
6/b/1/6b1e920c6d26ef93.jpg
6/b/3/6b31f9504f05951d.jpg
a/0/5/a05be66f7c4d50ad.jpg
0/8/6/086424dac480719d.jpg
f/4/a/f4a83d4fd4c295ce.jpg
7/8/e/78eec49927f91516.jpg
0/e/7/0e7e5a8e8e19cb80.jpg
7/e/0/7e0c0f12415a1eeb.jpg
d/d/f/ddf699ae684e9720.jpg
0/3/0/03007ff06f4135ac.jpg
9/e/4/9e4986d71e6a5cc1.jpg
9/5/a/95a61ddf456c2976.jpg
6/1/3/6130932e1041f473.jpg
4/a/1/4a1c8fac04fe9963.jpg
4/5/d/45dad4f74f53f758.jpg
9/9/1/991a9ea9a7d0cdb7.jpg
c/0/b/c0b1b5680bfbb680.jpg
e/6/d/e6dc75ffac05105e.jpg
e/c/9/ec9d74180b7dec85.jpg
2/c/0/2c0ce7a2bf2cffad.jpg
2/1/6/2163f7c04859edda.jpg
a/d/f/adfec77a5ce95821.jpg
5/5/8/55800bbcbce586bc.jpg
7/e/1/7e13e67d157e5cc4.jpg
f/8/7/f878601c8f286445.jpg
e/6/2/e62b324522c82d78.jpg
b/8/5/b85611fa0aafe9cc.jpg
9/1/7/917e15ca507fc309.jpg
b/e/d/bed073d83340943d.jpg
6/5/8/65880785ae013a30.jpg
e/4/7/e4730aeada6a3ea8.jpg
0/f/4/0f4534e9f56c0c72.jpg
7/8/7/787f31ab3fa9d0c4.jpg
6/6/9/66989776c4c97539.jpg
1/8/b/18b45d5d15f286ed.jpg
2/8/0/2809062053e69856.jpg
3/f/d/3fdc30131a9fe5b3.jpg
e/d/4/ed4f43ee2103110d.jpg
6/4/c/64cc3bd606e02ee2.jpg
2/6/f/26fc04a843d44ab5.jpg
f/4/a/f4af60aefe7dafde.jpg
3/2/6/326855ad4e018486.jpg
c/2/7/c27bc4b9f05ab482.jpg
a/4/e/a4ee0dee81b0ed80.jpg
b/4/2/b42cc13a6b242703.jpg
0/e/4/0e4bbea6112c1410.jpg
5/b/0/5b096feff8053bbe.jpg
8/0/a/80aa8c838b18da6c.jpg
f/b/2/fb23a4fa75cda40d.jpg
5/d/5/5d5f470269b1f865.jpg
7/0/2/702dac83297b3a54.jpg
0/0/3/003786c4bce51c1f.jpg
6/6/0/66006826f4faa0ba.jpg
5/2/f/52f37ae112284c48.jpg
7/b/3/7b34c57e3369b5fc.jpg
9/5/f/95f8946000592223.jpg
8/5/5/8553f4cb10bf5f98.jpg
1/2/a/12a65460f03c798f.jpg
e/a/2/ea2b7f7dec009916.jpg
d/9/f/d9fe583922325e52.jpg
6/1/b/61bc0c470d4ebb31.jpg
9/2/d/92dcc739f0dc269f.jpg
4/d/0/4d021db0912c1f9c.jpg
4/9/0/49095307dee9f228.jpg
c/b/f/cbfdaef2b0003e27.jpg
5/5/3/553b54d809a68eca.jpg
3/f/f/3ff0d633a6580116.jpg
7/7/2/772f5efae2a7dff4.jpg
3/0/4/30454cc701cf5a5f.jpg
2/7/e/27edd204fcb20087.jpg
7/e/7/7e71785f252f48f2.jpg
f/c/a/fca8f95f72ba39a1.jpg
2/1/b/21b5deafa994b8cc.jpg
4/1/0/410706df3b60a56f.jpg
e/9/4/e94b400ed158eb28.jpg
2/0/6/206a8240c43347b4.jpg
e/c/2/ec2150fd761cac0d.jpg
1/5/e/15e5fec31fb84982.jpg
2/a/0/2a043faf4ffa2684.jpg
9/3/2/932ec357fd09abf4.jpg
2/f/d/2fde43107f78c2b1.jpg
3/c/7/3c7ace2e59dd8e59.jpg
7/1/3/713f8fe273024ea2.jpg
c/8/c/c8c746f334edb438.jpg
a/7/2/a7244b8411ff96bd.jpg
2/5/0/250c264ad0c45c76.jpg
7/a/4/7a4152217a9703e4.jpg
3/6/d/36de19ee794cde17.jpg
9/a/3/9a30ca01df515dbc.jpg
c/b/a/cba37513d7b04916.jpg
4/4/b/44b705761cef3f1a.jpg
4/4/f/44fbfbe89fc82ffb.jpg
c/2/f/c2f95009de0293b1.jpg
2/4/b/24b0ef6b04ffabe4.jpg
a/a/7/aa711baa477eba5f.jpg
a/6/b/a6b8b60058b0522e.jpg
8/e/a/8eac66694a8e6380.jpg
f/5/7/f575ea80536f7ea7.jpg
e/d/5/ed5b701a3fe01884.jpg
a/1/e/a1e0652a85b6a34f.jpg
4/c/8/4c8ca5e3eba6dfe8.jpg
f/e/5/fe5e03898c5716f2.jpg
f/9/7/f973751355fbb445.jpg
6/5/b/65bddb19e521c4e1.jpg
6/9/8/698aaa7ad2518dd1.jpg
5/2/1/5212cd3e439a0ac2.jpg
0/d/8/0d881d2415d36782.jpg
7/f/3/7f352ad9c2fb5db7.jpg
f/e/d/fed9f61b53995bc0.jpg
b/0/3/b037273c82ed655e.jpg
8/d/5/8d5a12f72ab117d4.jpg
f/4/5/f45f6dd858378e53.jpg
3/8/f/38f468cc08d79584.jpg
1/8/1/181cd820035d2c60.jpg
1/0/6/106bb763dcfeb176.jpg
0/c/1/0c158be8cfccef8a.jpg
5/d/f/5df4220a2803a3cb.jpg
5/a/3/5a3d89c8762086f6.jpg
d/4/d/d4d50083214d279c.jpg
7/8/0/7802ae93d9b1aa28.jpg
5/8/7/587667949b1038c8.jpg
5/1/b/51b5f985282f6dd2.jpg
8/d/5/8d5dc7dc0cad1651.jpg
3/1/2/312bf2f45acaf11d.jpg
9/9/f/99f96ed117262b35.jpg
f/6/b/f6bee56483c91c8f.jpg
9/6/2/962c86dc6d236707.jpg
2/7/a/27a1e3a1c453d06d.jpg
a/8/2/a820d4bb668cbf00.jpg
4/3/0/430a9980a68e854f.jpg
b/9/6/b968956d5a0b123e.jpg
4/7/a/47a70fec48caf91d.jpg
e/e/e/eee0343b3c420ba2.jpg
e/e/5/ee52512a94e302f3.jpg
5/8/1/581cbbd513504991.jpg
1/c/a/1caae04d3f2b1937.jpg
b/8/6/b861d97e0bd92e00.jpg
2/2/f/22f0dcb54622a52a.jpg
3/e/f/3ef7156007c9052d.jpg
6/2/5/625da2bea5361a95.jpg
c/f/9/cf903d018b07434b.jpg
a/4/c/a4c93f83fdcabce3.jpg
d/5/9/d5929ef0f3319166.jpg
8/d/4/8d41023a1335ead9.jpg
1/e/1/1e1630331a08c442.jpg
f/c/1/fc1f78932570e823.jpg
e/f/7/ef72baff66942f81.jpg
a/7/4/a7400e378d1596c9.jpg
0/b/1/0b14bab49db7edee.jpg
1/0/f/10f7f30d4937eaf7.jpg
7/0/b/70bed80e78f19fcb.jpg
c/7/d/c7d2ed578379479e.jpg
3/d/7/3d71a7925ce54ebb.jpg
3/3/8/338fb8566d2b0e70.jpg
a/9/5/a9574cfba93322df.jpg
a/b/d/abd2f32822b4254b.jpg
9/8/a/98aadf886ef56826.jpg
c/b/2/cb23cd6c4243b78d.jpg
a/7/a/a7a6ac80af6d6a42.jpg
1/2/0/1202dfa20db0ebed.jpg
6/3/2/6326081edb24e410.jpg
b/0/7/b078c4dd0eb602d5.jpg
8/3/e/83e95b62d4a29c4b.jpg
3/3/d/33dafe02c31f0c88.jpg
4/8/8/4881e58fe966d122.jpg
7/0/8/7088b584dc1bb607.jpg
7/5/3/753a086a4efc10d6.jpg
1/0/8/1083281ad91768f6.jpg
1/2/0/1207ce460e81bba8.jpg
3/9/a/39a051f7323fc4fe.jpg
2/1/9/21975374aa8490a6.jpg
f/1/4/f1418f04e15f19ad.jpg
8/6/2/862484fbaba2d562.jpg
d/7/d/d7d340089cea9761.jpg
b/9/d/b9d69359f682dd88.jpg
0/3/3/0337edf4048ac66a.jpg
a/e/b/aebd223329b91906.jpg
3/7/e/37ed0b66001093b2.jpg
a/3/3/a33ca993e5cc58e8.jpg
7/c/e/7cee9baad8b53ee5.jpg
5/9/6/596c60f340450cdb.jpg
1/5/a/15ab00c6d48dd08f.jpg
6/5/a/65a1db4542f07d22.jpg
e/8/c/e8c9fb522ce92473.jpg
8/7/8/878410b4ed90d19a.jpg
6/b/8/6b87eb0b271bf2de.jpg
9/d/6/9d607e7d88941b3f.jpg
1/8/b/18b4e77782c8a733.jpg
e/4/b/e4b8ca08fd4b2cb0.jpg
2/d/5/2d5dc244ae21720a.jpg
1/d/d/1ddb9d8c33bfcc9c.jpg
a/9/d/a9d9e222fc17545e.jpg
2/0/2/202f5870ad01f46e.jpg
b/d/1/bd1b272fd83d8322.jpg
5/6/9/569b9b731722dbe6.jpg
c/e/7/ce7f1b3f9d0a0492.jpg
0/3/5/0353401ad01f13a1.jpg
1/d/0/1d08e7b4e993af40.jpg
1/0/9/10930f03c349b95a.jpg
0/4/1/041ffc81df3996de.jpg
6/4/e/64e26826b32254fc.jpg
5/0/9/50962cb944ce55bc.jpg
5/8/a/58aa130a8b600633.jpg
f/0/2/f02f9c83610b021b.jpg
1/4/e/14e6bef69db91214.jpg
e/f/9/ef9f6ffe916e651a.jpg
5/3/c/53c424525927b93a.jpg
d/f/2/df2d62e9ad6063b2.jpg
7/0/f/70fa2571233d1e36.jpg
d/0/f/d0f02f9e85441b23.jpg
e/6/d/e6d7b366d9b46f63.jpg
e/4/b/e4bcf39672af537b.jpg
e/e/6/ee613d067e1e0179.jpg
f/3/1/f3105d183fcabcdb.jpg
7/c/5/7c509f5b7c301f24.jpg
8/6/9/8692e5fd2c9d4e6a.jpg
e/9/6/e9684c794f86f032.jpg
d/3/c/d3c3e3e7b4854675.jpg
9/f/7/9f76983b45a0225c.jpg
6/3/9/639cdc0bc720170a.jpg
f/b/7/fb7afd60708ed1e9.jpg
f/6/f/f6fe632894a60852.jpg
f/c/1/fc13efcc4cbf2cc5.jpg
f/f/e/ffe5d9b2914d0994.jpg
1/a/5/1a5332cbfd4b498b.jpg
2/1/c/21c3576ba3957e66.jpg
8/7/5/8755df41bd802ac9.jpg
a/2/e/a2e332bc9512fa34.jpg
f/c/1/fc1808136753b633.jpg
6/8/d/68da2d7d16c81835.jpg
0/b/4/0b49c9edd4cc7a26.jpg
5/5/a/55a7043ad4c1b7f9.jpg
e/6/4/e646e2664236e9b9.jpg
7/5/3/753e2cc94db9c5d6.jpg
d/6/6/d66494631dae2c76.jpg
3/5/b/35b205a027784568.jpg
0/1/c/01cdb6df822b0369.jpg
b/b/b/bbbb150d11b8ad26.jpg
e/e/1/ee1be41cc2fc524f.jpg
c/1/e/c1e7f03fba04d316.jpg
4/8/7/4877614935672665.jpg
e/e/5/ee5a0b966c110172.jpg
2/3/5/23587c1a646e7ad5.jpg
0/a/a/0aa7c51ec0521190.jpg
e/0/4/e04d7c916eae75b0.jpg
d/2/3/d237e355a484bf7a.jpg
2/8/8/288dca733ab03bbe.jpg
7/5/1/75171bcd8cae04a4.jpg
0/a/0/0a08459844d5cd04.jpg
1/c/c/1cc881ab61de6781.jpg
5/d/3/5d35e9a1c10da173.jpg
b/d/5/bd578f25e9830836.jpg
3/7/5/375737697e128274.jpg
8/1/8/818b004619428bc2.jpg
9/b/1/9b13b5331c26b343.jpg
4/f/d/4fde219c2dbaa395.jpg
c/6/6/c66008f162e01348.jpg
8/4/8/84833a6de83f0cd5.jpg
f/5/9/f59a7956eea1cb49.jpg
5/3/3/53393cf1272b4779.jpg
1/f/9/1f9277e47da4a714.jpg
2/d/e/2de2d5a1a2ab762b.jpg
e/1/2/e120e95fefca8ddd.jpg
0/9/6/096f53ca071e4dc9.jpg
5/a/b/5ab9d9a0a9367f6a.jpg
c/f/3/cf363b5fd9799b12.jpg
5/9/0/5906504f36c01703.jpg
4/7/0/4704631404b65884.jpg
a/d/0/ad0bb78a7f93befd.jpg
6/9/e/69ec513286d173c1.jpg
1/b/f/1bf3939c9500257f.jpg
a/4/0/a40443493bfa9c75.jpg
3/8/b/38b24d54746b5163.jpg
5/7/d/57d35be761a5af4f.jpg
7/1/6/7162c92cef0dec9a.jpg
c/4/2/c42ea2e514181ddc.jpg
a/b/9/ab95bd4b7b7be3e5.jpg
0/2/5/0253b3045e7bde1e.jpg
9/1/6/91699572a26cfb06.jpg
6/4/b/64b162ef588fde33.jpg
8/d/d/8dd7bf60694e1baf.jpg
1/a/b/1abbadf40c9c9ba8.jpg
8/0/7/807f553b804c1580.jpg
a/f/7/af79a74885bf414c.jpg
e/7/2/e7248da09a7c4a40.jpg
8/c/d/8cde9ad1614f1801.jpg
6/6/5/665d012589bc89cb.jpg
3/c/e/3ce786c3e7f52577.jpg
b/e/4/be48afdf6b287253.jpg
d/6/5/d65dc54848b44f37.jpg
a/d/6/ad6cf71fc2f72d67.jpg
d/b/0/db0b1e6ea34076d6.jpg
1/e/1/1e1876847b0f606e.jpg
2/2/c/22ce0f7d018382e9.jpg
d/1/1/d11a42d0b06918a6.jpg
1/f/e/1fe08b2754fedc5b.jpg
8/b/4/8b4a7e36ad3eb8c8.jpg
f/2/1/f218652a89e7dc03.jpg
2/d/e/2de33effd658d6dc.jpg
2/3/3/2338acf8dcfab5fa.jpg
2/e/c/2ecfddd6de2ff1a0.jpg
0/a/0/0a01c449a97ce1e7.jpg
e/3/6/e3607fb0cdb20430.jpg
f/5/1/f5130d7cfdf0f6aa.jpg
9/6/8/9681feaf8fcf3f84.jpg
2/a/2/2a274f4eb4bda636.jpg
c/6/3/c63a720aa05234d6.jpg
0/c/7/0c73aa0c5fc2fbeb.jpg
7/4/3/743e8b3ee504dc62.jpg
0/4/9/0497104d4aea0e05.jpg
3/5/1/35109982e12d2faa.jpg
9/d/5/9d5837522302e034.jpg
7/f/d/7fd965a7a898578c.jpg
7/1/e/71ee0e0717caf8f3.jpg
c/3/c/c3c4116dc5bf3dd6.jpg
f/a/0/fa059161dea21919.jpg
5/9/e/59e7058b8820dfe0.jpg
6/3/6/6362132d3594cb2c.jpg
b/d/6/bd6c9dd8c68bdfd0.jpg
1/e/f/1efe76c220989cf5.jpg
4/f/9/4f9f23ee03d0a339.jpg
6/5/e/65ea0f13dc78c46c.jpg
d/7/0/d70b0e17b8ff3ef2.jpg
4/9/1/491137e57d802848.jpg
1/9/a/19afaf821a4d5448.jpg
b/1/d/b1de862472275cd8.jpg
4/4/8/4485f92909996533.jpg
a/e/2/ae2085d3781e0a7a.jpg
9/e/5/9e5da89221414aed.jpg
c/7/c/c7cf8ff49e8d07e2.jpg
a/1/9/a1950eead07c2646.jpg
c/e/b/ceb6d1ac8465ab25.jpg
f/7/1/f71b3a93b528d208.jpg
b/a/b/bab1e4a8143ddd75.jpg
1/d/6/1d64d6c2e21fd47d.jpg
7/b/d/7bdd39f742f66a46.jpg
b/d/2/bd2d9cec3a16530c.jpg
4/c/0/4c08039545804281.jpg
d/0/e/d0e53e418c53ce32.jpg
7/c/3/7c3e551d4cd29b63.jpg
9/8/3/9833c6a527cf61e1.jpg
0/0/f/00ffb4df801327e6.jpg
d/9/d/d9ddf2f4d452b42f.jpg
a/c/6/ac69312411033213.jpg
4/5/d/45dc4ed97f15d37c.jpg
5/8/2/582f027ecc04de49.jpg
e/3/b/e3b9aac7fa3ff35f.jpg
6/6/0/6609af8cdbebefee.jpg
0/b/7/0b73c3fcd61086fd.jpg
6/3/c/63c96ecfbcd59260.jpg
5/5/2/552d762b996ace5f.jpg
b/0/d/b0db2dea60386be5.jpg
1/9/d/19df6db1fcb7d3b5.jpg
1/7/a/17ae6145b5bcd3f6.jpg
6/7/1/67118cde91be145a.jpg
8/2/8/828eec615c347752.jpg
c/3/9/c3930db67b649d33.jpg
d/6/0/d608a97ed7fdcc65.jpg
8/d/d/8ddf0b1e27db5ba0.jpg
c/2/5/c25a55d1e75727b3.jpg
8/a/4/8a47c17ea9b85fd9.jpg
6/7/f/67ff218e8e9ed40b.jpg
c/5/2/c52238ee9dba846f.jpg
8/2/7/82768090c8bd4699.jpg
d/d/a/dda81c3752d6fb5e.jpg
5/0/3/503cf805f84be710.jpg
8/1/b/81ba8218449499d9.jpg
d/e/b/debbb61029c296fe.jpg
b/e/4/be40cdf749d76a7b.jpg
1/5/f/15f501a9b9f14270.jpg
d/e/d/ded0fd3a8223324a.jpg
9/1/7/917ddada8f7b558f.jpg
9/7/6/9765da6226480f44.jpg
6/1/0/6102e0c85b8ecb7d.jpg
f/a/0/fa0919ef4d505265.jpg
4/e/7/4e72efd98d4ae324.jpg
2/c/0/2c0e9c741603751c.jpg
d/a/d/dada1379b68692d9.jpg
8/d/9/8d958fca0f478c80.jpg
0/9/5/095b8269e4577d64.jpg
e/3/1/e315dd30db04755a.jpg
2/d/9/2d9c4771d4364f63.jpg
5/c/0/5c0852f135b2bc24.jpg
2/4/e/24e5cab04dda2bf4.jpg
3/0/4/3048b584fc69cbb5.jpg
a/4/2/a420447e408f923a.jpg
1/3/2/13236c21dec673ce.jpg
5/7/a/57a0b8c0d1b6cdf8.jpg
1/c/1/1c11b8eb5d9839c6.jpg
f/1/1/f115b3900a0c8535.jpg
1/c/0/1c0354233adcb833.jpg
e/b/f/ebfb6eb2912dfea2.jpg
6/2/0/620666fd54c020b0.jpg
e/2/a/e2a7c4f20f426869.jpg
1/8/b/18b208aca7753094.jpg
b/e/a/bea3469ff2a4a52a.jpg
0/d/b/0db9601b1b975362.jpg
e/6/3/e63d8a150cef999c.jpg
c/9/6/c96beab1aceb6da1.jpg
d/f/8/df8f2e09c680867c.jpg
c/5/a/c5a628e4061dcf4a.jpg
f/9/3/f932eb1182b5c642.jpg
4/e/c/4ecad91816da1ce4.jpg
7/9/3/793faaef50fbec47.jpg
0/c/6/0c626eec3da57d4f.jpg
9/8/8/988b50e74eaee5a5.jpg
4/9/3/493e695405541304.jpg
5/d/b/5db0911d5a2cb05f.jpg
2/1/2/212fc404e03a78bd.jpg
d/b/a/dba62797acfabb9e.jpg
4/2/7/427e8526c4be6a18.jpg
7/4/5/745541c971b27114.jpg
3/9/c/39c17063a6e39366.jpg
3/c/0/3c0959c3a81130a5.jpg
f/1/5/f1516603018fbab4.jpg
f/c/0/fc0c62b339aeed62.jpg
5/f/f/5ff8f473a9f0b0db.jpg
f/9/c/f9c220ddeaf8275c.jpg
1/d/e/1de5a9927a59570e.jpg
1/1/7/117a7900e46028f1.jpg
b/d/3/bd387830458f4f23.jpg
6/9/a/69a7908acb6ea3d5.jpg
9/d/8/9d8d837fca4ca994.jpg
d/1/d/d1d0fd84c0e6e2a4.jpg
d/7/5/d758a4531fc72fb2.jpg
c/7/e/c7e25108d0257914.jpg
5/8/3/5836c324e1cfc484.jpg
5/8/7/5870e5c1a86f6759.jpg
8/3/f/83fe2e38403619de.jpg
b/8/a/b8a007a885d226b5.jpg
4/5/d/45dd04a146ec1093.jpg
f/c/e/fcec1277093560d5.jpg
9/2/b/92b5fa68d94366e0.jpg
b/c/1/bc184fd019febdfa.jpg
d/1/d/d1d6b66db1327bc8.jpg
b/b/0/bb02bc449c363182.jpg
9/7/3/97330983f532d476.jpg
3/2/5/325270b45b629d23.jpg
f/1/1/f11291349e623793.jpg
e/2/9/e297bb83c2fd364f.jpg
6/2/8/6282ee1bfc893fce.jpg
1/5/d/15d6874062155c78.jpg
a/1/f/a1f4d3385e07ff90.jpg
d/5/9/d59452b32ac73c25.jpg
d/f/2/df2fc7dc4e4f4718.jpg
a/e/e/aee1c54deeba2358.jpg
8/d/9/8d9ef98e35577d21.jpg
6/b/7/6b7b412341b9df91.jpg
8/7/5/875d889d832fb46f.jpg
9/6/9/96938ed96b09838c.jpg
9/b/3/9b3fb3526850ebe7.jpg
d/a/3/da38d2d5ccd16437.jpg
1/6/e/16e408466c6196ac.jpg
b/e/2/be2ec50ba3f87c01.jpg
f/1/9/f193637f5b917045.jpg
8/5/4/8544ca6169deb3da.jpg
a/1/1/a1128541f7822a8c.jpg
8/3/2/8324e7939197b8ad.jpg
4/c/c/4cc8c4ea5b900ff4.jpg
9/f/1/9f1905e13088a0f7.jpg
9/c/9/9c9df5a32a68ceea.jpg
6/2/6/626eb2dbeea05320.jpg
b/a/1/ba18773e8831c60a.jpg
4/f/f/4ff93e343a4a4f5e.jpg
b/a/d/bade81b41e18126d.jpg
d/b/f/dbf5a68f8be4d247.jpg
a/6/1/a61d0c3e28c8044d.jpg
7/3/a/73a4a41a47d5de41.jpg
e/1/4/e14b81e71c355097.jpg
c/1/4/c14440b4dc99bfd1.jpg
d/1/7/d17bad51b8969714.jpg
[truncated: 8,294,238 more chars]
